# Supplementary material for: Genome-Wide Identification of Powdery Mildew Responsive Long Non-Coding RNAs in Cucurbita pepo
Source: Front Genet. 2022 Jul 1;13:933022. doi: 10.3389/fgene.2022.933022 (PMC9283782; doi:10.3389/fgene.2022.933022)
Supplement: Supplementary file 1 [file Table2.XLSX]

## Sheet: Sheet1
Table S2 Summary of C. pepo RNA-seq data
ID	Total Reads	Mapped Reads	GC(%)	N(%)	Q20(%)	Q30(%)
PR1	39957638	37466060 (93.76%)	43.5	0	98.31	94.84
PR2	46246788	43288497 (93.60%)	43.69	0	98.36	94.94
PR3	45653092	42957028 (94.09%)	43.88	0	98.42	95.05
PR4	43205456	40490130 (93.72%)	43.21	0	98.35	94.95
PR5	43756726	41388504 (94.59%)	43.43	0	98.31	94.87
PR6	39182176	37385697 (95.42%)	43.2	0	98.28	94.82
PS1	39265936	36910499 (94.00%)	43.34	0	98.36	94.94
PS2	43202302	40797058 (94.43%)	43.41	0	98.41	95.11
PS3	41221426	38713858 (93.92%)	43.17	0	98.43	95.13
PS4	45224380	42321873 (93.58%)	45.47	0	98.4	95.08
PS5	43686728	41168845 (94.24%)	43.25	0	98.32	94.83
PS6	44320750	41725985 (94.15%)	43.12	0	98.29	94.79
