# Supplementary material for: Genome-Wide Identification of Powdery Mildew Responsive Long Non-Coding RNAs in Cucurbita pepo
Source: Front Genet. 2022 Jul 1;13:933022. doi: 10.3389/fgene.2022.933022 (PMC9283782; doi:10.3389/fgene.2022.933022)
Supplement: Supplementary file 2 [file Table3.XLSX]

## Sheet: Sheet1
Table S3 Characteristics of all lncRNA identified in this study
lncRNA_id	Class	Chromosome	Strand	Length
MSTRG.24324.23	anti-sense-lncRNA	Cp4.1LG14	-	1244
MSTRG.16393.1	lincRNA	Cp4.1LG08	-	399
MSTRG.25801.4	lincRNA	Cp4.1LG16	+	767
MSTRG.24324.22	anti-sense-lncRNA	Cp4.1LG14	-	1067
MSTRG.96.2	sense-lncRNA	Cp4.1LG00	+	697
MSTRG.24324.27	lincRNA	Cp4.1LG14	-	491
MSTRG.226.2	lincRNA	Cp4.1LG00	-	918
MSTRG.6784.2	lincRNA	Cp4.1LG02	-	304
MSTRG.287.10	lincRNA	Cp4.1LG00	-	1071
MSTRG.13934.2	lincRNA	Cp4.1LG06	-	358
MSTRG.16393.2	lincRNA	Cp4.1LG08	-	400
MSTRG.21480.1	lincRNA	Cp4.1LG12	-	791
MSTRG.30946.1	lincRNA	Cp4.1LG20	+	381
MSTRG.226.3	lincRNA	Cp4.1LG00	-	1464
MSTRG.24434.2	lincRNA	Cp4.1LG14	+	1038
MSTRG.15095.1	lincRNA	Cp4.1LG07	-	334
MSTRG.25801.6	sense-lncRNA	Cp4.1LG16	+	1540
MSTRG.15659.1	lincRNA	Cp4.1LG07	+	872
MSTRG.19220.3	sense-lncRNA	Cp4.1LG10	-	763
MSTRG.287.11	lincRNA	Cp4.1LG00	-	1320
MSTRG.10774.1	lincRNA	Cp4.1LG04	-	345
MSTRG.27589.2	lincRNA	Cp4.1LG17	+	693
MSTRG.932.3	sense-lncRNA	Cp4.1LG00	+	594
MSTRG.10191.1	lincRNA	Cp4.1LG04	-	687
MSTRG.13346.2	lincRNA	Cp4.1LG06	-	571
MSTRG.6258.1	intronic_lncRNA	Cp4.1LG02	+	436
MSTRG.28782.3	lincRNA	Cp4.1LG18	-	209
MSTRG.15212.1	lincRNA	Cp4.1LG07	-	249
MSTRG.15616.2	lincRNA	Cp4.1LG07	+	961
MSTRG.21474.2	lincRNA	Cp4.1LG12	-	251
MSTRG.15116.12	lincRNA	Cp4.1LG07	+	12012
MSTRG.1763.1	lincRNA	Cp4.1LG00	-	375
MSTRG.8947.8	intronic_lncRNA	Cp4.1LG03	-	741
MSTRG.20997.1	lincRNA	Cp4.1LG11	-	1316
MSTRG.6333.14	intronic_lncRNA	Cp4.1LG02	-	1369
MSTRG.13934.1	lincRNA	Cp4.1LG06	-	368
MSTRG.18660.1	lincRNA	Cp4.1LG10	+	368
MSTRG.9933.1	lincRNA	Cp4.1LG04	-	280
MSTRG.13117.3	lincRNA	Cp4.1LG05	-	1675
MSTRG.11254.1	lincRNA	Cp4.1LG04	-	531
MSTRG.6300.15	sense-lncRNA	Cp4.1LG02	-	1734
MSTRG.16628.13	sense-lncRNA	Cp4.1LG08	+	1523
MSTRG.28417.1	lincRNA	Cp4.1LG18	+	1513
MSTRG.20320.2	sense-lncRNA	Cp4.1LG11	-	1144
MSTRG.11758.5	intronic_lncRNA	Cp4.1LG05	+	238
MSTRG.20601.1	lincRNA	Cp4.1LG11	-	255
MSTRG.13553.7	anti-sense-lncRNA	Cp4.1LG06	-	2797
MSTRG.1788.2	lincRNA	Cp4.1LG00	-	1285
MSTRG.19654.1	lincRNA	Cp4.1LG10	+	339
MSTRG.2248.1	lincRNA	Cp4.1LG00	+	416
MSTRG.12598.15	sense-lncRNA	Cp4.1LG05	-	940
MSTRG.697.1	lincRNA	Cp4.1LG00	+	585
MSTRG.26210.2	lincRNA	Cp4.1LG16	-	599
MSTRG.21010.10	anti-sense-lncRNA	Cp4.1LG11	+	675
MSTRG.14155.6	sense-lncRNA	Cp4.1LG06	+	1282
MSTRG.11616.1	sense-lncRNA	Cp4.1LG05	-	466
MSTRG.287.12	lincRNA	Cp4.1LG00	-	1356
MSTRG.27780.9	intronic_lncRNA	Cp4.1LG17	+	626
MSTRG.4279.24	sense-lncRNA	Cp4.1LG01	-	1166
MSTRG.967.1	lincRNA	Cp4.1LG00	-	1120
MSTRG.479.1	lincRNA	Cp4.1LG00	-	232
MSTRG.8735.1	lincRNA	Cp4.1LG03	+	282
MSTRG.12598.14	sense-lncRNA	Cp4.1LG05	-	1161
MSTRG.27938.3	lincRNA	Cp4.1LG18	+	441
MSTRG.14138.18	sense-lncRNA	Cp4.1LG06	+	3847
MSTRG.6133.8	lincRNA	Cp4.1LG02	-	1275
MSTRG.21010.7	anti-sense-lncRNA	Cp4.1LG11	+	1274
MSTRG.27787.3	lincRNA	Cp4.1LG17	-	1454
MSTRG.15616.1	lincRNA	Cp4.1LG07	+	622
MSTRG.16275.1	anti-sense-lncRNA	Cp4.1LG08	+	1547
MSTRG.16965.2	lincRNA	Cp4.1LG08	-	1560
MSTRG.21007.9	sense-lncRNA	Cp4.1LG11	+	435
MSTRG.16393.3	lincRNA	Cp4.1LG08	-	401
MSTRG.17854.1	lincRNA	Cp4.1LG09	-	1551
MSTRG.19424.20	sense-lncRNA	Cp4.1LG10	+	3707
MSTRG.18615.17	sense-lncRNA	Cp4.1LG10	+	687
MSTRG.5521.4	sense-lncRNA	Cp4.1LG01	+	740
MSTRG.16965.1	lincRNA	Cp4.1LG08	-	1934
MSTRG.17429.1	sense-lncRNA	Cp4.1LG09	-	1353
MSTRG.11264.6	sense-lncRNA	Cp4.1LG04	+	1098
MSTRG.4648.2	lincRNA	Cp4.1LG01	-	2842
MSTRG.96.16	lincRNA	Cp4.1LG00	+	1782
MSTRG.12598.16	sense-lncRNA	Cp4.1LG05	-	1186
MSTRG.989.1	lincRNA	Cp4.1LG00	+	208
MSTRG.19528.13	intronic_lncRNA	Cp4.1LG10	-	1189
MSTRG.24797.4	intronic_lncRNA	Cp4.1LG15	+	1717
MSTRG.23642.9	anti-sense-lncRNA	Cp4.1LG14	+	1426
MSTRG.16438.4	sense-lncRNA	Cp4.1LG08	-	582
MSTRG.25748.10	sense-lncRNA	Cp4.1LG16	+	393
MSTRG.9877.17	sense-lncRNA	Cp4.1LG04	+	1285
MSTRG.9814.9	sense-lncRNA	Cp4.1LG04	-	2800
MSTRG.1200.1	lincRNA	Cp4.1LG00	-	393
MSTRG.2073.1	lincRNA	Cp4.1LG00	-	284
MSTRG.15116.10	lincRNA	Cp4.1LG07	+	12012
MSTRG.24598.1	intronic_lncRNA	Cp4.1LG14	-	1978
MSTRG.2736.1	lincRNA	Cp4.1LG00	+	344
MSTRG.13871.14	lincRNA	Cp4.1LG06	-	2916
MSTRG.781.1	lincRNA	Cp4.1LG00	+	1253
MSTRG.19639.3	lincRNA	Cp4.1LG10	+	430
MSTRG.25890.1	lincRNA	Cp4.1LG16	-	643
MSTRG.21522.2	lincRNA	Cp4.1LG12	+	1256
MSTRG.25721.1	lincRNA	Cp4.1LG16	-	2799
MSTRG.20992.2	sense-lncRNA	Cp4.1LG11	-	947
MSTRG.6376.2	sense-lncRNA	Cp4.1LG02	-	603
MSTRG.23898.6	sense-lncRNA	Cp4.1LG14	+	1912
MSTRG.6504.7	sense-lncRNA	Cp4.1LG02	+	2771
MSTRG.21305.3	lincRNA	Cp4.1LG12	-	748
MSTRG.23271.19	sense-lncRNA	Cp4.1LG13	+	457
MSTRG.21861.2	lincRNA	Cp4.1LG12	-	905
MSTRG.96.32	lincRNA	Cp4.1LG00	+	406
MSTRG.28252.2	lincRNA	Cp4.1LG18	-	1313
MSTRG.14238.1	lincRNA	Cp4.1LG06	+	244
MSTRG.24075.16	sense-lncRNA	Cp4.1LG14	-	793
MSTRG.30169.11	sense-lncRNA	Cp4.1LG19	+	689
MSTRG.12356.1	lincRNA	Cp4.1LG05	+	817
MSTRG.21384.11	intronic_lncRNA	Cp4.1LG12	-	1882
MSTRG.2826.1	anti-sense-lncRNA	Cp4.1LG00	-	340
MSTRG.2671.1	lincRNA	Cp4.1LG00	+	283
MSTRG.24075.20	intronic_lncRNA	Cp4.1LG14	-	1434
MSTRG.14240.25	sense-lncRNA	Cp4.1LG06	+	1543
MSTRG.26570.6	sense-lncRNA	Cp4.1LG16	+	3575
MSTRG.8257.5	sense-lncRNA	Cp4.1LG03	-	2711
MSTRG.28024.2	lincRNA	Cp4.1LG18	+	235
MSTRG.22404.2	anti-sense-lncRNA	Cp4.1LG13	+	2419
MSTRG.6504.9	sense-lncRNA	Cp4.1LG02	+	2844
MSTRG.3173.6	lincRNA	Cp4.1LG01	+	995
MSTRG.17439.2	lincRNA	Cp4.1LG09	+	449
MSTRG.1330.1	lincRNA	Cp4.1LG00	-	332
MSTRG.13553.1	anti-sense-lncRNA	Cp4.1LG06	-	2162
MSTRG.11287.1	lincRNA	Cp4.1LG04	-	2230
MSTRG.2317.1	lincRNA	Cp4.1LG00	-	597
MSTRG.433.13	lincRNA	Cp4.1LG00	-	285
MSTRG.2707.1	lincRNA	Cp4.1LG00	-	311
MSTRG.4644.1	lincRNA	Cp4.1LG01	-	1004
MSTRG.28729.1	lincRNA	Cp4.1LG18	-	1879
MSTRG.20701.8	sense-lncRNA	Cp4.1LG11	-	470
MSTRG.20320.6	sense-lncRNA	Cp4.1LG11	-	648
MSTRG.27911.1	lincRNA	Cp4.1LG18	-	289
MSTRG.20.8	sense-lncRNA	Cp4.1LG00	+	1298
MSTRG.22154.20	intronic_lncRNA	Cp4.1LG12	+	2537
MSTRG.22679.5	sense-lncRNA	Cp4.1LG13	+	2001
MSTRG.28965.10	sense-lncRNA	Cp4.1LG19	-	2239
MSTRG.17170.7	sense-lncRNA	Cp4.1LG08	-	1469
MSTRG.25313.3	sense-lncRNA	Cp4.1LG15	+	1868
MSTRG.29098.6	sense-lncRNA	Cp4.1LG19	+	1606
MSTRG.14409.16	lincRNA	Cp4.1LG06	+	804
MSTRG.3296.14	lincRNA	Cp4.1LG01	-	346
MSTRG.17170.6	sense-lncRNA	Cp4.1LG08	-	971
MSTRG.28098.3	anti-sense-lncRNA	Cp4.1LG18	+	995
MSTRG.477.1	lincRNA	Cp4.1LG00	-	3274
MSTRG.14537.7	sense-lncRNA	Cp4.1LG07	-	1032
MSTRG.26802.5	sense-lncRNA	Cp4.1LG17	+	1982
MSTRG.25766.4	sense-lncRNA	Cp4.1LG16	+	1325
MSTRG.16628.5	sense-lncRNA	Cp4.1LG08	+	1210
MSTRG.28700.4	lincRNA	Cp4.1LG18	+	4210
MSTRG.12598.12	sense-lncRNA	Cp4.1LG05	-	3005
MSTRG.26614.9	sense-lncRNA	Cp4.1LG16	+	1362
MSTRG.16628.2	sense-lncRNA	Cp4.1LG08	+	1011
MSTRG.16628.3	sense-lncRNA	Cp4.1LG08	+	1006
MSTRG.10831.3	sense-lncRNA	Cp4.1LG04	-	883
MSTRG.16628.7	sense-lncRNA	Cp4.1LG08	+	1553
MSTRG.19317.3	anti-sense-lncRNA	Cp4.1LG10	+	2491
MSTRG.441.1	lincRNA	Cp4.1LG00	+	1255
MSTRG.19174.6	sense-lncRNA	Cp4.1LG10	-	812
MSTRG.23476.18	sense-lncRNA	Cp4.1LG13	+	3134
MSTRG.22189.3	anti-sense-lncRNA	Cp4.1LG12	+	312
MSTRG.16829.6	sense-lncRNA	Cp4.1LG08	-	1471
MSTRG.3740.1	lincRNA	Cp4.1LG01	+	523
MSTRG.21965.2	sense-lncRNA	Cp4.1LG12	+	1623
MSTRG.18045.2	lincRNA	Cp4.1LG09	-	466
MSTRG.30798.1	intronic_lncRNA	Cp4.1LG20	+	509
MSTRG.16628.20	sense-lncRNA	Cp4.1LG08	+	1621
MSTRG.10379.7	intronic_lncRNA	Cp4.1LG04	+	3026
MSTRG.5878.7	lincRNA	Cp4.1LG02	-	7851
MSTRG.20772.7	sense-lncRNA	Cp4.1LG11	-	2180
MSTRG.18349.10	lincRNA	Cp4.1LG09	-	1801
MSTRG.4586.3	lincRNA	Cp4.1LG01	+	1031
MSTRG.3869.2	lincRNA	Cp4.1LG01	-	1047
MSTRG.24989.3	lincRNA	Cp4.1LG15	-	1573
MSTRG.2827.1	anti-sense-lncRNA	Cp4.1LG00	+	342
MSTRG.654.2	lincRNA	Cp4.1LG00	-	512
MSTRG.16628.19	sense-lncRNA	Cp4.1LG08	+	1409
MSTRG.23961.3	anti-sense-lncRNA	Cp4.1LG14	+	687
MSTRG.15898.5	sense-lncRNA	Cp4.1LG08	+	1761
MSTRG.11721.1	intronic_lncRNA	Cp4.1LG05	+	307
MSTRG.16628.4	sense-lncRNA	Cp4.1LG08	+	1034
MSTRG.16357.1	intronic_lncRNA	Cp4.1LG08	-	844
MSTRG.26222.17	sense-lncRNA	Cp4.1LG16	-	1924
MSTRG.658.1	lincRNA	Cp4.1LG00	+	1540
MSTRG.27219.12	sense-lncRNA	Cp4.1LG17	-	455
MSTRG.26614.7	sense-lncRNA	Cp4.1LG16	+	962
MSTRG.14754.2	lincRNA	Cp4.1LG07	-	1709
MSTRG.7598.1	lincRNA	Cp4.1LG02	+	935
MSTRG.13887.10	sense-lncRNA	Cp4.1LG06	+	920
MSTRG.2197.1	lincRNA	Cp4.1LG00	-	758
MSTRG.16508.9	intronic_lncRNA	Cp4.1LG08	-	1450
MSTRG.12010.5	intronic_lncRNA	Cp4.1LG05	+	365
MSTRG.445.1	lincRNA	Cp4.1LG00	+	1511
MSTRG.22453.4	sense-lncRNA	Cp4.1LG13	+	1385
MSTRG.29156.14	sense-lncRNA	Cp4.1LG19	+	745
MSTRG.5136.1	lincRNA	Cp4.1LG01	+	259
MSTRG.16628.11	sense-lncRNA	Cp4.1LG08	+	1149
MSTRG.10299.4	sense-lncRNA	Cp4.1LG04	-	675
MSTRG.14976.1	lincRNA	Cp4.1LG07	+	2061
MSTRG.2332.1	lincRNA	Cp4.1LG00	+	589
MSTRG.2768.1	lincRNA	Cp4.1LG00	-	211
MSTRG.1641.1	anti-sense-lncRNA	Cp4.1LG00	+	596
MSTRG.672.11	sense-lncRNA	Cp4.1LG00	+	993
MSTRG.15116.11	lincRNA	Cp4.1LG07	+	11798
MSTRG.14966.4	intronic_lncRNA	Cp4.1LG07	-	626
MSTRG.22580.12	sense-lncRNA	Cp4.1LG13	-	874
MSTRG.24484.1	intronic_lncRNA	Cp4.1LG14	+	931
MSTRG.13218.7	sense-lncRNA	Cp4.1LG05	+	1852
MSTRG.10547.1	anti-sense-lncRNA	Cp4.1LG04	+	379
MSTRG.22175.1	lincRNA	Cp4.1LG12	+	880
MSTRG.746.1	lincRNA	Cp4.1LG00	+	431
MSTRG.14646.4	sense-lncRNA	Cp4.1LG07	+	390
MSTRG.7205.7	sense-lncRNA	Cp4.1LG02	-	1179
MSTRG.23910.1	lincRNA	Cp4.1LG14	+	611
MSTRG.20783.1	lincRNA	Cp4.1LG11	+	395
MSTRG.21525.5	sense-lncRNA	Cp4.1LG12	+	1321
MSTRG.17278.8	sense-lncRNA	Cp4.1LG09	-	613
MSTRG.8947.7	intronic_lncRNA	Cp4.1LG03	-	1447
MSTRG.24075.3	sense-lncRNA	Cp4.1LG14	-	1109
MSTRG.24519.2	lincRNA	Cp4.1LG14	+	1349
MSTRG.20654.6	intronic_lncRNA	Cp4.1LG11	-	1257
MSTRG.16628.8	sense-lncRNA	Cp4.1LG08	+	1075
MSTRG.22591.3	sense-lncRNA	Cp4.1LG13	+	2640
MSTRG.4591.2	sense-lncRNA	Cp4.1LG01	+	1356
MSTRG.636.7	sense-lncRNA	Cp4.1LG00	-	750
MSTRG.30846.6	sense-lncRNA	Cp4.1LG20	+	1770
MSTRG.14205.2	lincRNA	Cp4.1LG06	+	1520
MSTRG.10004.7	intronic_lncRNA	Cp4.1LG04	-	1978
MSTRG.20609.11	lincRNA	Cp4.1LG11	-	502
MSTRG.22219.11	lincRNA	Cp4.1LG12	-	553
MSTRG.16385.10	anti-sense-lncRNA	Cp4.1LG08	+	664
MSTRG.22620.1	lincRNA	Cp4.1LG13	-	1440
MSTRG.28072.5	lincRNA	Cp4.1LG18	+	787
MSTRG.3470.9	sense-lncRNA	Cp4.1LG01	+	2851
MSTRG.29486.6	sense-lncRNA	Cp4.1LG19	-	662
MSTRG.1028.4	sense-lncRNA	Cp4.1LG00	+	3134
MSTRG.9731.17	intronic_lncRNA	Cp4.1LG03	-	588
MSTRG.17921.1	lincRNA	Cp4.1LG09	-	4308
MSTRG.15344.1	sense-lncRNA	Cp4.1LG07	+	532
MSTRG.5872.7	lincRNA	Cp4.1LG02	-	2700
MSTRG.566.1	intronic_lncRNA	Cp4.1LG00	-	791
MSTRG.781.2	lincRNA	Cp4.1LG00	+	1048
MSTRG.10662.18	lincRNA	Cp4.1LG04	-	539
MSTRG.11688.2	lincRNA	Cp4.1LG05	+	1926
MSTRG.793.1	lincRNA	Cp4.1LG00	-	387
MSTRG.18512.8	sense-lncRNA	Cp4.1LG10	-	3992
MSTRG.16628.18	sense-lncRNA	Cp4.1LG08	+	1422
MSTRG.5570.12	sense-lncRNA	Cp4.1LG01	-	1852
MSTRG.12603.2	lincRNA	Cp4.1LG05	+	1593
MSTRG.6263.3	sense-lncRNA	Cp4.1LG02	+	946
MSTRG.3242.1	anti-sense-lncRNA	Cp4.1LG01	-	287
MSTRG.25260.2	lincRNA	Cp4.1LG15	+	1116
MSTRG.10129.8	intronic_lncRNA	Cp4.1LG04	-	699
MSTRG.1745.1	lincRNA	Cp4.1LG00	+	585
MSTRG.15020.1	lincRNA	Cp4.1LG07	+	738
MSTRG.345.1	lincRNA	Cp4.1LG00	-	214
MSTRG.19174.14	sense-lncRNA	Cp4.1LG10	-	1644
MSTRG.28493.1	lincRNA	Cp4.1LG18	-	1451
MSTRG.608.2	lincRNA	Cp4.1LG00	-	951
MSTRG.28282.6	intronic_lncRNA	Cp4.1LG18	+	5171
MSTRG.24459.1	lincRNA	Cp4.1LG14	+	921
MSTRG.25914.4	sense-lncRNA	Cp4.1LG16	-	1322
MSTRG.6451.1	lincRNA	Cp4.1LG02	+	422
MSTRG.11047.1	lincRNA	Cp4.1LG04	-	1430
MSTRG.557.1	lincRNA	Cp4.1LG00	-	239
MSTRG.1820.3	lincRNA	Cp4.1LG00	-	2747
MSTRG.12848.1	anti-sense-lncRNA	Cp4.1LG05	-	600
MSTRG.14246.1	lincRNA	Cp4.1LG06	+	1082
MSTRG.12919.1	intronic_lncRNA	Cp4.1LG05	-	2433
MSTRG.15080.1	intronic_lncRNA	Cp4.1LG07	-	1524
MSTRG.22234.1	anti-sense-lncRNA	Cp4.1LG12	+	1012
MSTRG.23562.1	intronic_lncRNA	Cp4.1LG13	+	815
MSTRG.19177.12	intronic_lncRNA	Cp4.1LG10	+	619
MSTRG.12813.3	intronic_lncRNA	Cp4.1LG05	-	1367
MSTRG.21776.1	anti-sense-lncRNA	Cp4.1LG12	+	506
MSTRG.12598.13	sense-lncRNA	Cp4.1LG05	-	2573
MSTRG.11984.3	lincRNA	Cp4.1LG05	-	1215
MSTRG.13653.8	sense-lncRNA	Cp4.1LG06	+	1217
MSTRG.10118.7	lincRNA	Cp4.1LG04	-	326
MSTRG.6264.1	lincRNA	Cp4.1LG02	+	802
MSTRG.12274.2	intronic_lncRNA	Cp4.1LG05	+	391
MSTRG.16628.14	sense-lncRNA	Cp4.1LG08	+	1050
MSTRG.4086.3	lincRNA	Cp4.1LG01	-	1947
MSTRG.23730.12	lincRNA	Cp4.1LG14	-	1180
MSTRG.22179.15	lincRNA	Cp4.1LG12	+	607
MSTRG.19424.26	sense-lncRNA	Cp4.1LG10	+	2734
MSTRG.12816.1	intronic_lncRNA	Cp4.1LG05	-	1074
MSTRG.8947.9	intronic_lncRNA	Cp4.1LG03	-	741
MSTRG.3817.3	lincRNA	Cp4.1LG01	-	209
MSTRG.16087.12	intronic_lncRNA	Cp4.1LG08	-	724
MSTRG.15158.3	intronic_lncRNA	Cp4.1LG07	-	856
MSTRG.10102.8	intronic_lncRNA	Cp4.1LG04	+	1178
MSTRG.22259.7	sense-lncRNA	Cp4.1LG12	-	1123
MSTRG.355.2	lincRNA	Cp4.1LG00	-	226
MSTRG.25054.2	lincRNA	Cp4.1LG15	-	356
MSTRG.14419.10	lincRNA	Cp4.1LG07	-	1067
MSTRG.25013.3	sense-lncRNA	Cp4.1LG15	-	761
MSTRG.29067.1	sense-lncRNA	Cp4.1LG19	+	578
MSTRG.17096.1	lincRNA	Cp4.1LG08	-	940
MSTRG.9635.6	intronic_lncRNA	Cp4.1LG03	-	903
MSTRG.5.4	lincRNA	Cp4.1LG00	-	906
MSTRG.11751.4	sense-lncRNA	Cp4.1LG05	-	686
MSTRG.17880.2	lincRNA	Cp4.1LG09	-	3159
MSTRG.13553.2	anti-sense-lncRNA	Cp4.1LG06	-	2349
MSTRG.12173.1	lincRNA	Cp4.1LG05	-	3162
MSTRG.25145.4	intronic_lncRNA	Cp4.1LG15	+	985
MSTRG.24841.1	intronic_lncRNA	Cp4.1LG15	-	763
MSTRG.21697.6	lincRNA	Cp4.1LG12	-	1058
MSTRG.26590.3	intronic_lncRNA	Cp4.1LG16	-	951
MSTRG.21861.1	lincRNA	Cp4.1LG12	-	915
MSTRG.9716.2	sense-lncRNA	Cp4.1LG03	+	1813
MSTRG.25474.1	lincRNA	Cp4.1LG15	-	1930
MSTRG.20346.2	intronic_lncRNA	Cp4.1LG11	+	719
MSTRG.21270.1	lincRNA	Cp4.1LG12	+	1196
MSTRG.2042.2	lincRNA	Cp4.1LG00	-	1052
MSTRG.28857.1	anti-sense-lncRNA	Cp4.1LG18	+	818
MSTRG.1070.1	lincRNA	Cp4.1LG00	-	820
MSTRG.10581.1	lincRNA	Cp4.1LG04	+	292
MSTRG.16533.10	sense-lncRNA	Cp4.1LG08	+	712
MSTRG.14246.2	lincRNA	Cp4.1LG06	+	2852
MSTRG.1078.4	lincRNA	Cp4.1LG00	-	584
MSTRG.7766.7	lincRNA	Cp4.1LG03	+	1310
MSTRG.24011.1	anti-sense-lncRNA	Cp4.1LG14	+	2411
MSTRG.2542.2	lincRNA	Cp4.1LG00	+	392
MSTRG.6753.1	intronic_lncRNA	Cp4.1LG02	-	589
MSTRG.16458.1	intronic_lncRNA	Cp4.1LG08	+	1834
MSTRG.27655.2	lincRNA	Cp4.1LG17	+	959
MSTRG.23037.1	intronic_lncRNA	Cp4.1LG13	+	1049
MSTRG.30281.5	sense-lncRNA	Cp4.1LG20	+	470
MSTRG.1995.1	lincRNA	Cp4.1LG00	-	1000
MSTRG.17074.14	sense-lncRNA	Cp4.1LG08	-	408
MSTRG.14880.10	sense-lncRNA	Cp4.1LG07	-	1050
MSTRG.22060.5	intronic_lncRNA	Cp4.1LG12	-	815
MSTRG.2276.1	lincRNA	Cp4.1LG00	+	412
MSTRG.2307.1	lincRNA	Cp4.1LG00	-	459
MSTRG.17650.1	intronic_lncRNA	Cp4.1LG09	-	626
MSTRG.9181.5	intronic_lncRNA	Cp4.1LG03	-	856
MSTRG.8119.3	sense-lncRNA	Cp4.1LG03	+	916
MSTRG.18007.5	intronic_lncRNA	Cp4.1LG09	+	746
MSTRG.6865.1	intronic_lncRNA	Cp4.1LG02	-	1918
MSTRG.20622.23	sense-lncRNA	Cp4.1LG11	-	1609
MSTRG.14206.1	lincRNA	Cp4.1LG06	+	1453
MSTRG.12598.17	sense-lncRNA	Cp4.1LG05	-	761
MSTRG.19622.1	intronic_lncRNA	Cp4.1LG10	+	2805
MSTRG.27938.1	lincRNA	Cp4.1LG18	+	268
MSTRG.21467.1	anti-sense-lncRNA	Cp4.1LG12	-	290
MSTRG.1301.1	sense-lncRNA	Cp4.1LG00	-	846
MSTRG.13680.9	sense-lncRNA	Cp4.1LG06	+	1339
MSTRG.13553.8	anti-sense-lncRNA	Cp4.1LG06	-	1478
MSTRG.17587.3	lincRNA	Cp4.1LG09	-	625
MSTRG.10379.6	intronic_lncRNA	Cp4.1LG04	+	2731
MSTRG.4776.1	anti-sense-lncRNA	Cp4.1LG01	-	830
MSTRG.3542.2	intronic_lncRNA	Cp4.1LG01	+	616
MSTRG.30132.2	lincRNA	Cp4.1LG19	-	835
MSTRG.19620.4	intronic_lncRNA	Cp4.1LG10	+	631
MSTRG.8683.1	sense-lncRNA	Cp4.1LG03	-	2188
MSTRG.12854.1	anti-sense-lncRNA	Cp4.1LG05	+	1076
MSTRG.4887.16	lincRNA	Cp4.1LG01	-	1009
MSTRG.29145.12	intronic_lncRNA	Cp4.1LG19	-	1940
MSTRG.15171.1	intronic_lncRNA	Cp4.1LG07	+	854
MSTRG.2430.1	lincRNA	Cp4.1LG00	+	450
MSTRG.22069.1	lincRNA	Cp4.1LG12	+	817
MSTRG.15207.1	lincRNA	Cp4.1LG07	+	379
MSTRG.23093.5	lincRNA	Cp4.1LG13	-	985
MSTRG.12130.1	intronic_lncRNA	Cp4.1LG05	-	778
MSTRG.16628.21	sense-lncRNA	Cp4.1LG08	+	1266
MSTRG.355.1	lincRNA	Cp4.1LG00	-	232
MSTRG.944.1	lincRNA	Cp4.1LG00	-	717
MSTRG.16766.2	lincRNA	Cp4.1LG08	-	1496
MSTRG.217.1	intronic_lncRNA	Cp4.1LG00	-	1687
MSTRG.20465.2	lincRNA	Cp4.1LG11	-	210
MSTRG.8934.19	lincRNA	Cp4.1LG03	-	469
MSTRG.30899.1	lincRNA	Cp4.1LG20	+	551
MSTRG.5393.4	sense-lncRNA	Cp4.1LG01	-	2595
MSTRG.7166.3	anti-sense-lncRNA	Cp4.1LG02	-	1529
MSTRG.27049.11	sense-lncRNA	Cp4.1LG17	-	958
MSTRG.26584.1	intronic_lncRNA	Cp4.1LG16	+	402
MSTRG.25126.10	intronic_lncRNA	Cp4.1LG15	+	1521
MSTRG.24747.2	lincRNA	Cp4.1LG15	+	2264
MSTRG.11135.2	sense-lncRNA	Cp4.1LG04	+	411
MSTRG.17126.2	lincRNA	Cp4.1LG08	-	1648
MSTRG.1796.3	lincRNA	Cp4.1LG00	+	745
MSTRG.1942.2	lincRNA	Cp4.1LG00	-	621
MSTRG.25922.1	intronic_lncRNA	Cp4.1LG16	-	858
MSTRG.26871.1	lincRNA	Cp4.1LG17	+	651
MSTRG.14688.13	sense-lncRNA	Cp4.1LG07	+	785
MSTRG.29062.1	lincRNA	Cp4.1LG19	+	207
MSTRG.5438.8	intronic_lncRNA	Cp4.1LG01	+	1253
MSTRG.14628.7	sense-lncRNA	Cp4.1LG07	+	961
MSTRG.851.1	lincRNA	Cp4.1LG00	-	874
MSTRG.19354.1	lincRNA	Cp4.1LG10	+	686
MSTRG.21861.3	lincRNA	Cp4.1LG12	-	2355
MSTRG.9781.1	lincRNA	Cp4.1LG04	-	420
MSTRG.6728.1	intronic_lncRNA	Cp4.1LG02	-	734
MSTRG.378.1	lincRNA	Cp4.1LG00	-	449
MSTRG.9188.1	intronic_lncRNA	Cp4.1LG03	-	658
MSTRG.21072.1	anti-sense-lncRNA	Cp4.1LG12	+	1880
MSTRG.10228.9	intronic_lncRNA	Cp4.1LG04	-	735
MSTRG.18878.10	sense-lncRNA	Cp4.1LG10	+	577
MSTRG.17457.8	lincRNA	Cp4.1LG09	+	1425
MSTRG.2021.1	lincRNA	Cp4.1LG00	-	941
MSTRG.20843.1	lincRNA	Cp4.1LG11	-	837
MSTRG.15415.13	intronic_lncRNA	Cp4.1LG07	+	948
MSTRG.19796.1	lincRNA	Cp4.1LG11	+	434
MSTRG.11361.10	sense-lncRNA	Cp4.1LG04	+	2463
MSTRG.7318.5	lincRNA	Cp4.1LG02	+	2064
MSTRG.21479.1	lincRNA	Cp4.1LG12	+	356
MSTRG.27655.1	lincRNA	Cp4.1LG17	+	813
MSTRG.27448.17	lincRNA	Cp4.1LG17	-	349
MSTRG.19337.3	lincRNA	Cp4.1LG10	+	502
MSTRG.10432.4	sense-lncRNA	Cp4.1LG04	+	1413
MSTRG.11563.1	intronic_lncRNA	Cp4.1LG05	-	505
MSTRG.29488.3	lincRNA	Cp4.1LG19	+	336
MSTRG.25823.12	sense-lncRNA	Cp4.1LG16	-	1761
MSTRG.23069.1	sense-lncRNA	Cp4.1LG13	-	1139
MSTRG.396.1	lincRNA	Cp4.1LG00	-	651
MSTRG.14084.4	anti-sense-lncRNA	Cp4.1LG06	-	910
MSTRG.16628.16	sense-lncRNA	Cp4.1LG08	+	838
MSTRG.21243.6	sense-lncRNA	Cp4.1LG12	+	1540
MSTRG.20191.2	lincRNA	Cp4.1LG11	+	818
MSTRG.4386.1	anti-sense-lncRNA	Cp4.1LG01	-	413
MSTRG.998.1	lincRNA	Cp4.1LG00	-	4682
MSTRG.18057.5	sense-lncRNA	Cp4.1LG09	-	875
MSTRG.27461.1	intronic_lncRNA	Cp4.1LG17	-	1806
MSTRG.23565.10	intronic_lncRNA	Cp4.1LG14	-	662
MSTRG.4618.2	lincRNA	Cp4.1LG01	-	591
MSTRG.23476.19	sense-lncRNA	Cp4.1LG13	+	2166
MSTRG.1322.1	anti-sense-lncRNA	Cp4.1LG00	-	1863
MSTRG.24155.1	intronic_lncRNA	Cp4.1LG14	+	1605
MSTRG.5587.6	sense-lncRNA	Cp4.1LG01	+	1657
MSTRG.13653.7	sense-lncRNA	Cp4.1LG06	+	1248
MSTRG.4026.17	intronic_lncRNA	Cp4.1LG01	-	1108
MSTRG.28029.14	lincRNA	Cp4.1LG18	-	466
MSTRG.746.2	lincRNA	Cp4.1LG00	+	435
MSTRG.11984.2	lincRNA	Cp4.1LG05	-	828
MSTRG.17489.3	sense-lncRNA	Cp4.1LG09	-	967
MSTRG.21676.1	lincRNA	Cp4.1LG12	-	456
MSTRG.1020.1	lincRNA	Cp4.1LG00	-	1567
MSTRG.23688.1	lincRNA	Cp4.1LG14	-	875
MSTRG.19555.4	intronic_lncRNA	Cp4.1LG10	+	375
MSTRG.13569.1	lincRNA	Cp4.1LG06	+	613
MSTRG.25668.13	intronic_lncRNA	Cp4.1LG15	+	2068
MSTRG.15201.12	lincRNA	Cp4.1LG07	+	916
MSTRG.16628.10	sense-lncRNA	Cp4.1LG08	+	1072
MSTRG.10343.1	intronic_lncRNA	Cp4.1LG04	-	738
MSTRG.25290.7	intronic_lncRNA	Cp4.1LG15	+	310
MSTRG.18273.17	sense-lncRNA	Cp4.1LG09	+	945
MSTRG.11728.2	anti-sense-lncRNA	Cp4.1LG05	-	635
MSTRG.9410.4	lincRNA	Cp4.1LG03	+	404
MSTRG.839.1	lincRNA	Cp4.1LG00	-	488
MSTRG.11329.7	sense-lncRNA	Cp4.1LG04	+	1724
MSTRG.7619.1	lincRNA	Cp4.1LG02	+	562
MSTRG.27999.2	lincRNA	Cp4.1LG18	+	671
MSTRG.5099.6	intronic_lncRNA	Cp4.1LG01	+	282
MSTRG.4341.1	intronic_lncRNA	Cp4.1LG01	+	941
MSTRG.2578.1	lincRNA	Cp4.1LG00	-	292
MSTRG.19562.1	lincRNA	Cp4.1LG10	-	2971
MSTRG.9953.1	lincRNA	Cp4.1LG04	-	742
MSTRG.20427.1	intronic_lncRNA	Cp4.1LG11	+	1627
MSTRG.17704.1	lincRNA	Cp4.1LG09	-	848
MSTRG.21472.1	intronic_lncRNA	Cp4.1LG12	-	493
MSTRG.17888.1	anti-sense-lncRNA	Cp4.1LG09	+	312
MSTRG.16628.15	sense-lncRNA	Cp4.1LG08	+	1009
MSTRG.9716.3	sense-lncRNA	Cp4.1LG03	+	2926
MSTRG.23431.12	lincRNA	Cp4.1LG13	-	4616
MSTRG.24134.3	anti-sense-lncRNA	Cp4.1LG14	+	1392
MSTRG.20892.1	intronic_lncRNA	Cp4.1LG11	+	358
MSTRG.24891.1	anti-sense-lncRNA	Cp4.1LG15	+	712
MSTRG.16081.1	intronic_lncRNA	Cp4.1LG08	-	293
MSTRG.15566.4	intronic_lncRNA	Cp4.1LG07	-	906
MSTRG.25064.3	lincRNA	Cp4.1LG15	+	1018
MSTRG.603.1	intronic_lncRNA	Cp4.1LG00	-	782
MSTRG.19447.1	lincRNA	Cp4.1LG10	+	1148
MSTRG.18901.1	anti-sense-lncRNA	Cp4.1LG10	+	433
MSTRG.13276.8	sense-lncRNA	Cp4.1LG06	-	757
MSTRG.15955.6	sense-lncRNA	Cp4.1LG08	+	430
MSTRG.3583.8	intronic_lncRNA	Cp4.1LG01	+	629
MSTRG.5429.13	sense-lncRNA	Cp4.1LG01	-	2029
MSTRG.18820.3	anti-sense-lncRNA	Cp4.1LG10	+	1877
MSTRG.560.3	sense-lncRNA	Cp4.1LG00	-	1034
MSTRG.13553.4	anti-sense-lncRNA	Cp4.1LG06	-	2638
MSTRG.19616.1	lincRNA	Cp4.1LG10	+	1223
MSTRG.5821.1	lincRNA	Cp4.1LG01	+	690
MSTRG.616.3	sense-lncRNA	Cp4.1LG00	-	1510
MSTRG.29123.7	sense-lncRNA	Cp4.1LG19	-	1006
MSTRG.17457.10	sense-lncRNA	Cp4.1LG09	+	1031
MSTRG.16362.23	lincRNA	Cp4.1LG08	-	767
MSTRG.1019.1	lincRNA	Cp4.1LG00	+	1238
MSTRG.19216.1	anti-sense-lncRNA	Cp4.1LG10	-	1340
MSTRG.25713.1	intronic_lncRNA	Cp4.1LG16	+	528
MSTRG.4135.1	lincRNA	Cp4.1LG01	-	717
MSTRG.8520.3	lincRNA	Cp4.1LG03	-	567
MSTRG.4004.12	intronic_lncRNA	Cp4.1LG01	+	731
MSTRG.27422.1	lincRNA	Cp4.1LG17	+	321
MSTRG.5700.18	sense-lncRNA	Cp4.1LG01	+	721
MSTRG.2572.1	lincRNA	Cp4.1LG00	+	203
MSTRG.3100.9	intronic_lncRNA	Cp4.1LG01	+	543
MSTRG.1097.1	lincRNA	Cp4.1LG00	-	929
MSTRG.8181.2	lincRNA	Cp4.1LG03	-	422
MSTRG.2360.1	lincRNA	Cp4.1LG00	+	572
MSTRG.25184.5	intronic_lncRNA	Cp4.1LG15	-	744
MSTRG.20386.1	lincRNA	Cp4.1LG11	-	3629
MSTRG.16362.28	intronic_lncRNA	Cp4.1LG08	-	3052
MSTRG.12813.2	intronic_lncRNA	Cp4.1LG05	-	1403
MSTRG.15778.1	lincRNA	Cp4.1LG08	-	365
MSTRG.31109.5	sense-lncRNA	Cp4.1LG20	+	1355
MSTRG.5197.12	intronic_lncRNA	Cp4.1LG01	+	698
MSTRG.20415.1	intronic_lncRNA	Cp4.1LG11	-	295
MSTRG.23304.9	sense-lncRNA	Cp4.1LG13	-	1003
MSTRG.481.1	lincRNA	Cp4.1LG00	-	433
MSTRG.3555.2	intronic_lncRNA	Cp4.1LG01	-	359
MSTRG.13450.6	sense-lncRNA	Cp4.1LG06	-	911
MSTRG.938.2	sense-lncRNA	Cp4.1LG00	-	515
MSTRG.25916.1	intronic_lncRNA	Cp4.1LG16	-	628
MSTRG.21269.4	lincRNA	Cp4.1LG12	+	502
MSTRG.20801.1	sense-lncRNA	Cp4.1LG11	+	2052
MSTRG.8385.1	lincRNA	Cp4.1LG03	-	831
MSTRG.4902.5	intronic_lncRNA	Cp4.1LG01	+	1265
MSTRG.14699.5	lincRNA	Cp4.1LG07	-	477
MSTRG.23787.10	lincRNA	Cp4.1LG14	-	386
MSTRG.26074.3	lincRNA	Cp4.1LG16	-	781
MSTRG.26590.5	sense-lncRNA	Cp4.1LG16	-	1078
MSTRG.29422.1	lincRNA	Cp4.1LG19	-	1114
MSTRG.24012.7	anti-sense-lncRNA	Cp4.1LG14	+	931
MSTRG.30383.1	anti-sense-lncRNA	Cp4.1LG20	-	697
MSTRG.2334.1	lincRNA	Cp4.1LG00	+	261
MSTRG.22229.11	intronic_lncRNA	Cp4.1LG12	+	1348
MSTRG.17922.1	lincRNA	Cp4.1LG09	-	209
MSTRG.10000.4	lincRNA	Cp4.1LG04	-	647
MSTRG.14278.21	intronic_lncRNA	Cp4.1LG06	-	916
MSTRG.10173.43	intronic_lncRNA	Cp4.1LG04	-	606
MSTRG.4026.18	sense-lncRNA	Cp4.1LG01	-	1093
MSTRG.26575.2	intronic_lncRNA	Cp4.1LG16	-	1311
MSTRG.4870.1	intronic_lncRNA	Cp4.1LG01	+	770
MSTRG.25962.1	lincRNA	Cp4.1LG16	-	888
MSTRG.13249.1	anti-sense-lncRNA	Cp4.1LG06	+	1017
MSTRG.22619.3	lincRNA	Cp4.1LG13	-	340
MSTRG.23910.3	lincRNA	Cp4.1LG14	+	391
MSTRG.11909.2	sense-lncRNA	Cp4.1LG05	-	1609
MSTRG.8934.20	lincRNA	Cp4.1LG03	-	757
MSTRG.30153.1	anti-sense-lncRNA	Cp4.1LG19	+	723
MSTRG.5.7	lincRNA	Cp4.1LG00	-	998
MSTRG.6391.12	lincRNA	Cp4.1LG02	-	623
MSTRG.10779.6	anti-sense-lncRNA	Cp4.1LG04	+	671
MSTRG.13553.5	anti-sense-lncRNA	Cp4.1LG06	-	2170
MSTRG.4115.7	intronic_lncRNA	Cp4.1LG01	+	1628
MSTRG.25535.1	intronic_lncRNA	Cp4.1LG15	+	995
MSTRG.25808.1	lincRNA	Cp4.1LG16	-	1345
MSTRG.6779.2	anti-sense-lncRNA	Cp4.1LG02	-	2672
MSTRG.16723.2	anti-sense-lncRNA	Cp4.1LG08	+	426
MSTRG.22869.13	intronic_lncRNA	Cp4.1LG13	-	1243
MSTRG.14764.1	intronic_lncRNA	Cp4.1LG07	+	448
MSTRG.1504.1	lincRNA	Cp4.1LG00	-	455
MSTRG.12401.2	anti-sense-lncRNA	Cp4.1LG05	-	1177
MSTRG.23109.2	lincRNA	Cp4.1LG13	-	906
MSTRG.5755.4	lincRNA	Cp4.1LG01	-	1586
MSTRG.11214.2	lincRNA	Cp4.1LG04	+	419
MSTRG.4533.1	lincRNA	Cp4.1LG01	-	821
MSTRG.10015.3	sense-lncRNA	Cp4.1LG04	+	1098
MSTRG.20822.1	lincRNA	Cp4.1LG11	-	674
MSTRG.13084.10	sense-lncRNA	Cp4.1LG05	-	710
MSTRG.18342.2	sense-lncRNA	Cp4.1LG09	+	1356
MSTRG.3267.3	lincRNA	Cp4.1LG01	+	1719
MSTRG.6866.1	intronic_lncRNA	Cp4.1LG02	-	1325
MSTRG.16403.1	intronic_lncRNA	Cp4.1LG08	-	575
MSTRG.16363.1	intronic_lncRNA	Cp4.1LG08	-	766
MSTRG.643.6	lincRNA	Cp4.1LG00	+	1220
MSTRG.1301.2	sense-lncRNA	Cp4.1LG00	-	925
MSTRG.20785.12	sense-lncRNA	Cp4.1LG11	+	876
MSTRG.13117.2	lincRNA	Cp4.1LG05	-	1545
MSTRG.1485.1	lincRNA	Cp4.1LG00	+	510
MSTRG.11185.3	intronic_lncRNA	Cp4.1LG04	+	501
MSTRG.4.1	lincRNA	Cp4.1LG00	-	511
MSTRG.27176.1	lincRNA	Cp4.1LG17	-	231
MSTRG.5748.1	intronic_lncRNA	Cp4.1LG01	-	304
MSTRG.8607.2	intronic_lncRNA	Cp4.1LG03	-	585
MSTRG.14313.9	sense-lncRNA	Cp4.1LG06	+	1073
MSTRG.22128.9	anti-sense-lncRNA	Cp4.1LG12	+	267
MSTRG.15726.1	anti-sense-lncRNA	Cp4.1LG08	-	1261
MSTRG.14046.1	lincRNA	Cp4.1LG06	+	428
MSTRG.16204.17	intronic_lncRNA	Cp4.1LG08	-	451
MSTRG.24036.1	intronic_lncRNA	Cp4.1LG14	-	381
MSTRG.17510.1	intronic_lncRNA	Cp4.1LG09	-	510
MSTRG.24434.3	lincRNA	Cp4.1LG14	+	614
MSTRG.14960.1	intronic_lncRNA	Cp4.1LG07	+	233
MSTRG.24269.11	intronic_lncRNA	Cp4.1LG14	-	528
MSTRG.16628.12	sense-lncRNA	Cp4.1LG08	+	1035
MSTRG.20308.7	intronic_lncRNA	Cp4.1LG11	+	336
MSTRG.18749.2	lincRNA	Cp4.1LG10	+	1129
MSTRG.30827.1	lincRNA	Cp4.1LG20	+	1698
MSTRG.2251.1	lincRNA	Cp4.1LG00	+	303
MSTRG.5734.2	lincRNA	Cp4.1LG01	+	343
MSTRG.17149.1	lincRNA	Cp4.1LG08	+	481
MSTRG.8549.1	intronic_lncRNA	Cp4.1LG03	+	826
MSTRG.13001.5	sense-lncRNA	Cp4.1LG05	-	444
MSTRG.16875.7	intronic_lncRNA	Cp4.1LG08	-	581
MSTRG.14413.10	sense-lncRNA	Cp4.1LG07	+	525
MSTRG.11928.3	lincRNA	Cp4.1LG05	+	1375
MSTRG.30302.1	intronic_lncRNA	Cp4.1LG20	-	270
MSTRG.14858.1	intronic_lncRNA	Cp4.1LG07	+	329
MSTRG.12811.1	lincRNA	Cp4.1LG05	+	905
MSTRG.24794.1	lincRNA	Cp4.1LG15	+	1122
MSTRG.15207.3	lincRNA	Cp4.1LG07	+	1265
MSTRG.22304.10	intronic_lncRNA	Cp4.1LG13	+	991
MSTRG.28967.4	intronic_lncRNA	Cp4.1LG19	+	453
MSTRG.5454.11	sense-lncRNA	Cp4.1LG01	-	1458
MSTRG.29247.1	lincRNA	Cp4.1LG19	-	1207
MSTRG.16387.1	intronic_lncRNA	Cp4.1LG08	+	470
MSTRG.23569.1	intronic_lncRNA	Cp4.1LG14	-	981
MSTRG.26696.9	sense-lncRNA	Cp4.1LG16	+	1006
MSTRG.23785.5	intronic_lncRNA	Cp4.1LG14	+	574
MSTRG.11909.3	sense-lncRNA	Cp4.1LG05	-	1606
MSTRG.4386.2	anti-sense-lncRNA	Cp4.1LG01	-	374
MSTRG.688.1	lincRNA	Cp4.1LG00	-	354
MSTRG.6417.2	lincRNA	Cp4.1LG02	-	933
MSTRG.752.7	sense-lncRNA	Cp4.1LG00	+	943
MSTRG.16168.13	sense-lncRNA	Cp4.1LG08	-	715
MSTRG.3431.1	intronic_lncRNA	Cp4.1LG01	-	1790
MSTRG.2422.1	lincRNA	Cp4.1LG00	-	408
MSTRG.20043.1	anti-sense-lncRNA	Cp4.1LG11	-	1370
MSTRG.9541.1	lincRNA	Cp4.1LG03	+	2321
MSTRG.1322.3	anti-sense-lncRNA	Cp4.1LG00	-	1433
MSTRG.29439.2	intronic_lncRNA	Cp4.1LG19	+	377
MSTRG.7231.1	intronic_lncRNA	Cp4.1LG02	-	1937
MSTRG.2821.1	lincRNA	Cp4.1LG00	+	209
MSTRG.15400.5	sense-lncRNA	Cp4.1LG07	+	1881
MSTRG.23787.11	lincRNA	Cp4.1LG14	-	386
MSTRG.6555.1	lincRNA	Cp4.1LG02	-	894
MSTRG.96.14	lincRNA	Cp4.1LG00	+	1638
MSTRG.744.1	lincRNA	Cp4.1LG00	+	458
MSTRG.2232.1	lincRNA	Cp4.1LG00	+	698
MSTRG.18406.1	lincRNA	Cp4.1LG09	+	1160
MSTRG.8403.1	intronic_lncRNA	Cp4.1LG03	+	1230
MSTRG.792.3	lincRNA	Cp4.1LG00	+	323
MSTRG.18964.1	lincRNA	Cp4.1LG10	+	431
MSTRG.29085.1	intronic_lncRNA	Cp4.1LG19	-	454
MSTRG.31068.2	lincRNA	Cp4.1LG20	-	749
MSTRG.28098.2	anti-sense-lncRNA	Cp4.1LG18	+	1051
MSTRG.6036.1	lincRNA	Cp4.1LG02	+	823
MSTRG.19828.10	sense-lncRNA	Cp4.1LG11	-	667
MSTRG.26942.11	intronic_lncRNA	Cp4.1LG17	-	459
MSTRG.20772.10	sense-lncRNA	Cp4.1LG11	-	614
MSTRG.14118.3	sense-lncRNA	Cp4.1LG06	-	2635
MSTRG.24270.4	intronic_lncRNA	Cp4.1LG14	-	449
MSTRG.17757.5	sense-lncRNA	Cp4.1LG09	-	576
MSTRG.438.1	intronic_lncRNA	Cp4.1LG00	+	443
MSTRG.19686.7	intronic_lncRNA	Cp4.1LG10	-	380
MSTRG.26688.9	sense-lncRNA	Cp4.1LG16	-	912
MSTRG.21483.6	sense-lncRNA	Cp4.1LG12	-	750
MSTRG.5737.6	sense-lncRNA	Cp4.1LG01	+	626
MSTRG.24669.9	lincRNA	Cp4.1LG14	+	771
MSTRG.1015.11	intronic_lncRNA	Cp4.1LG00	+	297
MSTRG.6141.1	intronic_lncRNA	Cp4.1LG02	-	251
MSTRG.2275.1	lincRNA	Cp4.1LG00	+	242
MSTRG.6636.14	intronic_lncRNA	Cp4.1LG02	-	413
MSTRG.1515.3	lincRNA	Cp4.1LG00	-	413
MSTRG.23616.4	lincRNA	Cp4.1LG14	+	907
MSTRG.26870.19	lincRNA	Cp4.1LG17	+	619
MSTRG.31123.7	sense-lncRNA	Cp4.1LG20	+	564
MSTRG.24732.6	lincRNA	Cp4.1LG15	-	926
MSTRG.904.1	lincRNA	Cp4.1LG00	-	223
MSTRG.17085.2	sense-lncRNA	Cp4.1LG08	-	1634
MSTRG.17797.1	intronic_lncRNA	Cp4.1LG09	-	374
MSTRG.16353.9	sense-lncRNA	Cp4.1LG08	+	702
MSTRG.17429.3	lincRNA	Cp4.1LG09	-	698
MSTRG.394.1	lincRNA	Cp4.1LG00	-	286
MSTRG.24012.6	sense-lncRNA	Cp4.1LG14	+	1116
MSTRG.24119.9	sense-lncRNA	Cp4.1LG14	-	1082
MSTRG.24098.21	lincRNA	Cp4.1LG14	+	740
MSTRG.25073.4	anti-sense-lncRNA	Cp4.1LG15	+	2060
MSTRG.6549.2	anti-sense-lncRNA	Cp4.1LG02	-	1176
MSTRG.16630.8	intronic_lncRNA	Cp4.1LG08	-	702
MSTRG.1889.1	lincRNA	Cp4.1LG00	-	649
MSTRG.18598.7	sense-lncRNA	Cp4.1LG10	-	1101
MSTRG.29139.5	intronic_lncRNA	Cp4.1LG19	-	298
MSTRG.24543.1	anti-sense-lncRNA	Cp4.1LG14	+	430
MSTRG.7190.2	lincRNA	Cp4.1LG02	-	1551
MSTRG.19620.8	intronic_lncRNA	Cp4.1LG10	+	708
MSTRG.30427.1	anti-sense-lncRNA	Cp4.1LG20	-	384
MSTRG.22815.2	anti-sense-lncRNA	Cp4.1LG13	+	1357
MSTRG.739.1	anti-sense-lncRNA	Cp4.1LG00	+	302
MSTRG.1767.1	lincRNA	Cp4.1LG00	+	313
MSTRG.20046.2	sense-lncRNA	Cp4.1LG11	+	535
MSTRG.5872.6	lincRNA	Cp4.1LG02	-	1259
MSTRG.7658.1	anti-sense-lncRNA	Cp4.1LG02	+	1319
MSTRG.9977.3	anti-sense-lncRNA	Cp4.1LG04	+	1415
MSTRG.14526.2	lincRNA	Cp4.1LG07	-	2182
MSTRG.21806.10	intronic_lncRNA	Cp4.1LG12	+	554
MSTRG.16630.6	intronic_lncRNA	Cp4.1LG08	-	590
MSTRG.17932.18	intronic_lncRNA	Cp4.1LG09	+	556
MSTRG.25809.1	lincRNA	Cp4.1LG16	-	1465
MSTRG.133.4	intronic_lncRNA	Cp4.1LG00	-	386
MSTRG.16371.1	intronic_lncRNA	Cp4.1LG08	-	2041
MSTRG.10039.8	intronic_lncRNA	Cp4.1LG04	-	684
MSTRG.8202.1	intronic_lncRNA	Cp4.1LG03	-	319
MSTRG.13010.2	sense-lncRNA	Cp4.1LG05	+	1569
MSTRG.3381.1	anti-sense-lncRNA	Cp4.1LG01	-	215
MSTRG.5964.1	anti-sense-lncRNA	Cp4.1LG02	+	614
MSTRG.887.1	lincRNA	Cp4.1LG00	-	248
MSTRG.195.2	lincRNA	Cp4.1LG00	-	444
MSTRG.8679.27	sense-lncRNA	Cp4.1LG03	+	1602
MSTRG.821.1	lincRNA	Cp4.1LG00	+	483
MSTRG.27623.1	anti-sense-lncRNA	Cp4.1LG17	-	1507
MSTRG.1264.1	lincRNA	Cp4.1LG00	-	408
MSTRG.20297.8	sense-lncRNA	Cp4.1LG11	+	1057
MSTRG.17547.1	lincRNA	Cp4.1LG09	-	623
MSTRG.17885.1	lincRNA	Cp4.1LG09	+	411
MSTRG.28156.15	intronic_lncRNA	Cp4.1LG18	+	1924
MSTRG.2508.1	lincRNA	Cp4.1LG00	+	224
MSTRG.11559.5	sense-lncRNA	Cp4.1LG05	+	400
MSTRG.10366.8	lincRNA	Cp4.1LG04	+	2092
MSTRG.20465.1	lincRNA	Cp4.1LG11	-	282
MSTRG.20901.1	intronic_lncRNA	Cp4.1LG11	-	578
MSTRG.28022.1	anti-sense-lncRNA	Cp4.1LG18	-	1197
MSTRG.26722.1	lincRNA	Cp4.1LG17	+	373
MSTRG.23799.1	anti-sense-lncRNA	Cp4.1LG14	-	1295
MSTRG.8757.1	lincRNA	Cp4.1LG03	-	1163
MSTRG.25474.2	lincRNA	Cp4.1LG15	-	923
MSTRG.13906.1	intronic_lncRNA	Cp4.1LG06	-	835
MSTRG.11928.1	sense-lncRNA	Cp4.1LG05	+	1143
MSTRG.27588.13	intronic_lncRNA	Cp4.1LG17	+	966
MSTRG.13683.8	lincRNA	Cp4.1LG06	+	993
MSTRG.8261.2	anti-sense-lncRNA	Cp4.1LG03	-	435
MSTRG.25914.2	intronic_lncRNA	Cp4.1LG16	-	1092
MSTRG.20916.1	lincRNA	Cp4.1LG11	+	537
MSTRG.28156.4	intronic_lncRNA	Cp4.1LG18	+	654
MSTRG.1820.1	lincRNA	Cp4.1LG00	-	2645
MSTRG.20412.12	intronic_lncRNA	Cp4.1LG11	+	334
MSTRG.9202.1	anti-sense-lncRNA	Cp4.1LG03	+	1146
MSTRG.13696.2	lincRNA	Cp4.1LG06	-	749
MSTRG.7863.1	lincRNA	Cp4.1LG03	+	922
MSTRG.11440.20	lincRNA	Cp4.1LG04	-	1209
MSTRG.8900.1	lincRNA	Cp4.1LG03	-	263
MSTRG.21807.15	intronic_lncRNA	Cp4.1LG12	+	928
MSTRG.15231.14	intronic_lncRNA	Cp4.1LG07	+	955
MSTRG.18252.1	lincRNA	Cp4.1LG09	+	1112
MSTRG.22086.3	lincRNA	Cp4.1LG12	+	2188
MSTRG.22141.1	lincRNA	Cp4.1LG12	-	1307
MSTRG.24427.4	intronic_lncRNA	Cp4.1LG14	+	741
MSTRG.29173.10	lincRNA	Cp4.1LG19	+	562
MSTRG.7496.2	intronic_lncRNA	Cp4.1LG02	-	1612
MSTRG.2447.1	lincRNA	Cp4.1LG00	+	361
MSTRG.4018.1	intronic_lncRNA	Cp4.1LG01	+	364
MSTRG.20525.1	intronic_lncRNA	Cp4.1LG11	-	540
MSTRG.6005.2	anti-sense-lncRNA	Cp4.1LG02	-	1319
MSTRG.2049.2	lincRNA	Cp4.1LG00	+	275
MSTRG.22439.1	lincRNA	Cp4.1LG13	+	1239
MSTRG.29202.6	sense-lncRNA	Cp4.1LG19	+	375
MSTRG.31023.1	intronic_lncRNA	Cp4.1LG20	-	2168
MSTRG.15116.14	lincRNA	Cp4.1LG07	+	2956
MSTRG.9309.3	anti-sense-lncRNA	Cp4.1LG03	+	422
MSTRG.350.2	lincRNA	Cp4.1LG00	-	238
MSTRG.11047.3	lincRNA	Cp4.1LG04	-	839
MSTRG.8757.2	lincRNA	Cp4.1LG03	-	1193
MSTRG.28327.1	lincRNA	Cp4.1LG18	-	889
MSTRG.7293.12	intronic_lncRNA	Cp4.1LG02	+	531
MSTRG.11009.1	lincRNA	Cp4.1LG04	-	473
MSTRG.27597.1	intronic_lncRNA	Cp4.1LG17	-	408
MSTRG.29105.2	lincRNA	Cp4.1LG19	+	420
MSTRG.761.1	lincRNA	Cp4.1LG00	-	318
MSTRG.16370.16	intronic_lncRNA	Cp4.1LG08	-	569
MSTRG.27378.1	anti-sense-lncRNA	Cp4.1LG17	-	861
MSTRG.2360.2	lincRNA	Cp4.1LG00	+	569
MSTRG.1065.3	sense-lncRNA	Cp4.1LG00	-	724
MSTRG.18249.1	intronic_lncRNA	Cp4.1LG09	+	288
MSTRG.5415.1	anti-sense-lncRNA	Cp4.1LG01	+	641
MSTRG.16638.10	intronic_lncRNA	Cp4.1LG08	+	979
MSTRG.11733.2	sense-lncRNA	Cp4.1LG05	-	738
MSTRG.13325.1	anti-sense-lncRNA	Cp4.1LG06	+	565
MSTRG.5488.2	sense-lncRNA	Cp4.1LG01	-	625
MSTRG.1111.1	lincRNA	Cp4.1LG00	-	233
MSTRG.29157.2	intronic_lncRNA	Cp4.1LG19	+	718
MSTRG.26803.16	lincRNA	Cp4.1LG17	-	1593
MSTRG.11833.10	lincRNA	Cp4.1LG05	+	377
MSTRG.13871.15	lincRNA	Cp4.1LG06	-	2916
MSTRG.20780.13	intronic_lncRNA	Cp4.1LG11	-	638
MSTRG.6434.1	lincRNA	Cp4.1LG02	+	1716
MSTRG.1218.1	lincRNA	Cp4.1LG00	-	920
MSTRG.9936.1	lincRNA	Cp4.1LG04	+	949
MSTRG.19055.11	intronic_lncRNA	Cp4.1LG10	-	859
MSTRG.4381.11	intronic_lncRNA	Cp4.1LG01	+	230
MSTRG.11758.7	intronic_lncRNA	Cp4.1LG05	+	234
MSTRG.16336.6	intronic_lncRNA	Cp4.1LG08	-	721
MSTRG.833.1	lincRNA	Cp4.1LG00	-	514
MSTRG.14228.1	lincRNA	Cp4.1LG06	-	469
MSTRG.686.1	lincRNA	Cp4.1LG00	+	475
MSTRG.792.1	lincRNA	Cp4.1LG00	+	315
MSTRG.11041.1	intronic_lncRNA	Cp4.1LG04	+	528
MSTRG.24639.1	anti-sense-lncRNA	Cp4.1LG14	-	501
MSTRG.18687.1	lincRNA	Cp4.1LG10	-	451
MSTRG.1080.2	lincRNA	Cp4.1LG00	-	271
MSTRG.17165.3	sense-lncRNA	Cp4.1LG08	-	853
MSTRG.9740.13	intronic_lncRNA	Cp4.1LG03	+	329
MSTRG.13553.3	anti-sense-lncRNA	Cp4.1LG06	-	1950
MSTRG.22413.1	intronic_lncRNA	Cp4.1LG13	+	774
MSTRG.6896.1	lincRNA	Cp4.1LG02	-	310
MSTRG.17055.5	sense-lncRNA	Cp4.1LG08	+	630
MSTRG.12723.4	anti-sense-lncRNA	Cp4.1LG05	-	320
MSTRG.14519.4	sense-lncRNA	Cp4.1LG07	+	1082
MSTRG.22729.2	intronic_lncRNA	Cp4.1LG13	+	349
MSTRG.24016.1	lincRNA	Cp4.1LG14	+	250
MSTRG.7320.6	intronic_lncRNA	Cp4.1LG02	+	594
MSTRG.16117.1	intronic_lncRNA	Cp4.1LG08	+	367
MSTRG.13033.1	anti-sense-lncRNA	Cp4.1LG05	+	1870
MSTRG.18710.1	lincRNA	Cp4.1LG10	-	940
MSTRG.4404.1	lincRNA	Cp4.1LG01	-	309
MSTRG.30755.1	lincRNA	Cp4.1LG20	+	224
MSTRG.16414.2	lincRNA	Cp4.1LG08	-	703
MSTRG.17832.1	lincRNA	Cp4.1LG09	+	1320
MSTRG.7618.1	lincRNA	Cp4.1LG02	+	1040
MSTRG.17438.3	lincRNA	Cp4.1LG09	+	1510
MSTRG.11323.2	anti-sense-lncRNA	Cp4.1LG04	-	421
MSTRG.26803.11	sense-lncRNA	Cp4.1LG17	-	1570
MSTRG.17321.1	lincRNA	Cp4.1LG09	-	371
MSTRG.11350.1	lincRNA	Cp4.1LG04	+	217
MSTRG.4026.15	intronic_lncRNA	Cp4.1LG01	-	894
MSTRG.5837.16	intronic_lncRNA	Cp4.1LG01	+	406
MSTRG.20788.1	lincRNA	Cp4.1LG11	-	647
MSTRG.13871.18	lincRNA	Cp4.1LG06	-	2885
MSTRG.18057.6	anti-sense-lncRNA	Cp4.1LG09	-	722
MSTRG.30207.1	lincRNA	Cp4.1LG19	+	498
MSTRG.22414.1	intronic_lncRNA	Cp4.1LG13	-	476
MSTRG.18306.1	lincRNA	Cp4.1LG09	-	259
MSTRG.27437.11	intronic_lncRNA	Cp4.1LG17	-	336
MSTRG.9197.3	lincRNA	Cp4.1LG03	-	686
MSTRG.17078.7	intronic_lncRNA	Cp4.1LG08	+	480
MSTRG.2636.1	lincRNA	Cp4.1LG00	-	238
MSTRG.7310.7	intronic_lncRNA	Cp4.1LG02	+	434
MSTRG.3973.3	anti-sense-lncRNA	Cp4.1LG01	-	983
MSTRG.661.1	lincRNA	Cp4.1LG00	-	231
MSTRG.17438.2	lincRNA	Cp4.1LG09	+	2406
MSTRG.12356.2	lincRNA	Cp4.1LG05	+	792
MSTRG.8947.5	intronic_lncRNA	Cp4.1LG03	-	818
MSTRG.23272.1	anti-sense-lncRNA	Cp4.1LG13	-	396
MSTRG.57.5	intronic_lncRNA	Cp4.1LG00	+	575
MSTRG.26336.1	lincRNA	Cp4.1LG16	-	508
MSTRG.8419.4	intronic_lncRNA	Cp4.1LG03	+	518
MSTRG.8396.6	intronic_lncRNA	Cp4.1LG03	+	1205
MSTRG.615.2	lincRNA	Cp4.1LG00	-	290
MSTRG.19482.1	lincRNA	Cp4.1LG10	+	690
MSTRG.11170.10	sense-lncRNA	Cp4.1LG04	-	633
MSTRG.146.1	lincRNA	Cp4.1LG00	-	282
MSTRG.14976.3	lincRNA	Cp4.1LG07	+	1899
MSTRG.704.4	lincRNA	Cp4.1LG00	+	481
MSTRG.23148.1	lincRNA	Cp4.1LG13	+	1103
MSTRG.24545.1	intronic_lncRNA	Cp4.1LG14	-	731
MSTRG.3898.1	lincRNA	Cp4.1LG01	+	860
MSTRG.1537.1	lincRNA	Cp4.1LG00	-	730
MSTRG.720.1	lincRNA	Cp4.1LG00	-	429
MSTRG.24519.3	anti-sense-lncRNA	Cp4.1LG14	+	485
MSTRG.13100.1	anti-sense-lncRNA	Cp4.1LG05	-	452
MSTRG.18501.5	intronic_lncRNA	Cp4.1LG10	+	994
MSTRG.9731.16	intronic_lncRNA	Cp4.1LG03	-	483
MSTRG.6549.1	anti-sense-lncRNA	Cp4.1LG02	-	394
MSTRG.16021.11	intronic_lncRNA	Cp4.1LG08	+	557
MSTRG.4355.1	intronic_lncRNA	Cp4.1LG01	+	783
MSTRG.23910.4	lincRNA	Cp4.1LG14	+	625
MSTRG.13453.1	anti-sense-lncRNA	Cp4.1LG06	-	509
MSTRG.5481.1	lincRNA	Cp4.1LG01	-	611
MSTRG.1322.4	lincRNA	Cp4.1LG00	-	1457
MSTRG.30997.1	lincRNA	Cp4.1LG20	-	215
MSTRG.4176.3	intronic_lncRNA	Cp4.1LG01	+	1384
MSTRG.21401.4	anti-sense-lncRNA	Cp4.1LG12	+	670
MSTRG.17469.1	lincRNA	Cp4.1LG09	+	868
MSTRG.16638.9	intronic_lncRNA	Cp4.1LG08	+	1006
MSTRG.30270.4	sense-lncRNA	Cp4.1LG20	+	1047
MSTRG.1744.1	lincRNA	Cp4.1LG00	-	548
MSTRG.26554.1	anti-sense-lncRNA	Cp4.1LG16	-	213
MSTRG.20874.1	lincRNA	Cp4.1LG11	+	831
MSTRG.26803.12	lincRNA	Cp4.1LG17	-	3424
MSTRG.4846.1	lincRNA	Cp4.1LG01	+	209
MSTRG.24708.2	sense-lncRNA	Cp4.1LG14	-	1248
MSTRG.13276.5	sense-lncRNA	Cp4.1LG06	-	601
MSTRG.13871.16	lincRNA	Cp4.1LG06	-	1548
MSTRG.19082.1	anti-sense-lncRNA	Cp4.1LG10	-	1139
MSTRG.1560.2	lincRNA	Cp4.1LG00	-	417
MSTRG.18669.6	intronic_lncRNA	Cp4.1LG10	-	1107
MSTRG.19692.1	intronic_lncRNA	Cp4.1LG10	+	590
MSTRG.27919.1	lincRNA	Cp4.1LG18	+	1197
MSTRG.3791.1	lincRNA	Cp4.1LG01	+	963
MSTRG.1001.1	lincRNA	Cp4.1LG00	+	312
MSTRG.24107.3	sense-lncRNA	Cp4.1LG14	+	910
MSTRG.14932.1	lincRNA	Cp4.1LG07	-	843
MSTRG.19639.2	lincRNA	Cp4.1LG10	+	430
MSTRG.30840.1	intronic_lncRNA	Cp4.1LG20	+	458
MSTRG.29000.9	sense-lncRNA	Cp4.1LG19	+	581
MSTRG.22058.5	sense-lncRNA	Cp4.1LG12	+	922
MSTRG.16626.7	intronic_lncRNA	Cp4.1LG08	+	369
MSTRG.5120.2	intronic_lncRNA	Cp4.1LG01	+	1631
MSTRG.5482.1	lincRNA	Cp4.1LG01	-	641
MSTRG.19274.1	anti-sense-lncRNA	Cp4.1LG10	+	668
MSTRG.16230.7	sense-lncRNA	Cp4.1LG08	+	623
MSTRG.9250.1	lincRNA	Cp4.1LG03	-	2176
MSTRG.22165.2	lincRNA	Cp4.1LG12	+	1312
MSTRG.6414.1	lincRNA	Cp4.1LG02	-	469
MSTRG.6103.1	anti-sense-lncRNA	Cp4.1LG02	-	988
MSTRG.15484.6	intronic_lncRNA	Cp4.1LG07	+	1977
MSTRG.21554.1	lincRNA	Cp4.1LG12	+	497
MSTRG.3634.3	sense-lncRNA	Cp4.1LG01	+	935
MSTRG.8037.3	lincRNA	Cp4.1LG03	+	755
MSTRG.24212.6	anti-sense-lncRNA	Cp4.1LG14	+	920
MSTRG.24025.1	anti-sense-lncRNA	Cp4.1LG14	+	309
MSTRG.9264.1	intronic_lncRNA	Cp4.1LG03	+	473
MSTRG.18234.1	lincRNA	Cp4.1LG09	-	1519
MSTRG.27883.1	intronic_lncRNA	Cp4.1LG17	+	556
MSTRG.19377.1	lincRNA	Cp4.1LG10	-	1968
MSTRG.2042.1	lincRNA	Cp4.1LG00	-	1184
MSTRG.7255.1	lincRNA	Cp4.1LG02	-	266
MSTRG.3914.10	lincRNA	Cp4.1LG01	-	1014
MSTRG.23833.4	lincRNA	Cp4.1LG14	-	1452
MSTRG.15805.3	sense-lncRNA	Cp4.1LG08	+	2514
MSTRG.16208.2	intronic_lncRNA	Cp4.1LG08	-	517
MSTRG.24948.1	anti-sense-lncRNA	Cp4.1LG15	+	212
MSTRG.10034.8	intronic_lncRNA	Cp4.1LG04	+	710
MSTRG.6264.2	lincRNA	Cp4.1LG02	+	683
MSTRG.29083.11	intronic_lncRNA	Cp4.1LG19	-	619
MSTRG.6500.5	lincRNA	Cp4.1LG02	-	555
MSTRG.30999.2	lincRNA	Cp4.1LG20	+	405
MSTRG.4785.6	sense-lncRNA	Cp4.1LG01	-	496
MSTRG.5487.1	lincRNA	Cp4.1LG01	-	428
MSTRG.6643.1	lincRNA	Cp4.1LG02	-	347
MSTRG.26711.1	sense-lncRNA	Cp4.1LG17	-	653
MSTRG.13670.12	sense-lncRNA	Cp4.1LG06	-	397
MSTRG.25237.10	sense-lncRNA	Cp4.1LG15	-	1235
MSTRG.902.1	lincRNA	Cp4.1LG00	-	738
MSTRG.8782.1	intronic_lncRNA	Cp4.1LG03	-	244
MSTRG.21277.1	intronic_lncRNA	Cp4.1LG12	-	645
MSTRG.7077.1	intronic_lncRNA	Cp4.1LG02	-	743
MSTRG.12813.5	intronic_lncRNA	Cp4.1LG05	-	1236
MSTRG.25022.1	anti-sense-lncRNA	Cp4.1LG15	+	321
MSTRG.11972.10	sense-lncRNA	Cp4.1LG05	+	644
MSTRG.20123.5	sense-lncRNA	Cp4.1LG11	+	2314
MSTRG.17555.8	sense-lncRNA	Cp4.1LG09	-	507
MSTRG.16643.6	anti-sense-lncRNA	Cp4.1LG08	+	828
MSTRG.18141.2	anti-sense-lncRNA	Cp4.1LG09	-	243
MSTRG.22484.1	lincRNA	Cp4.1LG13	+	598
MSTRG.4016.14	intronic_lncRNA	Cp4.1LG01	+	407
MSTRG.11332.1	lincRNA	Cp4.1LG04	-	409
MSTRG.15484.5	intronic_lncRNA	Cp4.1LG07	+	2789
MSTRG.2074.1	lincRNA	Cp4.1LG00	+	976
MSTRG.5599.11	anti-sense-lncRNA	Cp4.1LG01	+	588
MSTRG.24846.5	intronic_lncRNA	Cp4.1LG15	+	585
MSTRG.19174.15	sense-lncRNA	Cp4.1LG10	-	1645
MSTRG.15382.1	intronic_lncRNA	Cp4.1LG07	+	508
MSTRG.13084.6	sense-lncRNA	Cp4.1LG05	-	378
MSTRG.20850.6	intronic_lncRNA	Cp4.1LG11	+	475
MSTRG.5867.1	intronic_lncRNA	Cp4.1LG01	-	202
MSTRG.8013.1	anti-sense-lncRNA	Cp4.1LG03	-	524
MSTRG.23858.1	lincRNA	Cp4.1LG14	-	221
MSTRG.2072.1	lincRNA	Cp4.1LG00	+	890
MSTRG.23791.8	sense-lncRNA	Cp4.1LG14	-	1146
MSTRG.26730.2	anti-sense-lncRNA	Cp4.1LG17	-	472
MSTRG.14233.4	sense-lncRNA	Cp4.1LG06	-	5164
MSTRG.18590.1	intronic_lncRNA	Cp4.1LG10	-	351
MSTRG.30479.1	lincRNA	Cp4.1LG20	+	659
MSTRG.18294.1	lincRNA	Cp4.1LG09	+	1010
MSTRG.6574.10	sense-lncRNA	Cp4.1LG02	-	467
MSTRG.19434.1	lincRNA	Cp4.1LG10	+	430
MSTRG.8703.6	sense-lncRNA	Cp4.1LG03	+	742
MSTRG.13553.9	anti-sense-lncRNA	Cp4.1LG06	-	1883
MSTRG.30960.2	anti-sense-lncRNA	Cp4.1LG20	+	1616
MSTRG.7737.4	anti-sense-lncRNA	Cp4.1LG02	+	1257
MSTRG.10882.1	lincRNA	Cp4.1LG04	-	272
MSTRG.6170.1	lincRNA	Cp4.1LG02	+	315
MSTRG.15020.2	lincRNA	Cp4.1LG07	+	450
MSTRG.15793.1	anti-sense-lncRNA	Cp4.1LG08	+	734
MSTRG.29157.1	intronic_lncRNA	Cp4.1LG19	+	743
MSTRG.14126.1	lincRNA	Cp4.1LG06	+	667
MSTRG.17921.2	lincRNA	Cp4.1LG09	-	1076
MSTRG.11447.4	sense-lncRNA	Cp4.1LG04	-	1005
MSTRG.3962.1	lincRNA	Cp4.1LG01	-	511
MSTRG.8211.5	lincRNA	Cp4.1LG03	-	324
MSTRG.4648.4	lincRNA	Cp4.1LG01	-	1388
MSTRG.12679.1	anti-sense-lncRNA	Cp4.1LG05	+	481
MSTRG.2101.1	lincRNA	Cp4.1LG00	-	608
MSTRG.2200.1	lincRNA	Cp4.1LG00	-	595
MSTRG.19269.3	anti-sense-lncRNA	Cp4.1LG10	+	648
MSTRG.20915.1	lincRNA	Cp4.1LG11	+	463
MSTRG.9897.3	lincRNA	Cp4.1LG04	-	368
MSTRG.24989.1	lincRNA	Cp4.1LG15	-	659
MSTRG.20939.4	sense-lncRNA	Cp4.1LG11	-	813
MSTRG.5850.7	lincRNA	Cp4.1LG01	+	1824
MSTRG.1322.2	anti-sense-lncRNA	Cp4.1LG00	-	1601
MSTRG.1770.3	sense-lncRNA	Cp4.1LG00	+	402
MSTRG.3609.4	anti-sense-lncRNA	Cp4.1LG01	+	1247
MSTRG.27437.12	intronic_lncRNA	Cp4.1LG17	-	1046
MSTRG.11046.1	lincRNA	Cp4.1LG04	+	445
MSTRG.29172.1	lincRNA	Cp4.1LG19	+	229
MSTRG.8894.1	anti-sense-lncRNA	Cp4.1LG03	-	939
MSTRG.11916.1	lincRNA	Cp4.1LG05	+	310
MSTRG.2037.1	lincRNA	Cp4.1LG00	+	969
MSTRG.12816.2	intronic_lncRNA	Cp4.1LG05	-	848
MSTRG.676.1	lincRNA	Cp4.1LG00	+	645
MSTRG.5700.16	sense-lncRNA	Cp4.1LG01	+	801
MSTRG.27918.12	sense-lncRNA	Cp4.1LG18	+	1651
MSTRG.23343.1	lincRNA	Cp4.1LG13	-	240
MSTRG.21269.2	lincRNA	Cp4.1LG12	+	1552
MSTRG.7260.1	lincRNA	Cp4.1LG02	-	510
MSTRG.14071.7	intronic_lncRNA	Cp4.1LG06	-	417
MSTRG.22820.15	intronic_lncRNA	Cp4.1LG13	+	386
MSTRG.13033.4	anti-sense-lncRNA	Cp4.1LG05	+	1932
MSTRG.28052.1	intronic_lncRNA	Cp4.1LG18	-	404
MSTRG.1041.1	lincRNA	Cp4.1LG00	+	312
MSTRG.15506.1	lincRNA	Cp4.1LG07	-	1347
MSTRG.2242.1	lincRNA	Cp4.1LG00	-	330
MSTRG.27956.1	lincRNA	Cp4.1LG18	+	405
MSTRG.30383.2	lincRNA	Cp4.1LG20	-	1404
MSTRG.22326.13	intronic_lncRNA	Cp4.1LG13	-	339
MSTRG.26059.1	anti-sense-lncRNA	Cp4.1LG16	-	408
MSTRG.1684.1	lincRNA	Cp4.1LG00	-	828
MSTRG.16156.21	intronic_lncRNA	Cp4.1LG08	-	441
MSTRG.30383.3	lincRNA	Cp4.1LG20	-	1177
MSTRG.20773.1	intronic_lncRNA	Cp4.1LG11	-	594
MSTRG.3643.1	lincRNA	Cp4.1LG01	-	895
MSTRG.15077.1	lincRNA	Cp4.1LG07	-	384
MSTRG.25387.5	sense-lncRNA	Cp4.1LG15	-	430
MSTRG.16906.1	lincRNA	Cp4.1LG08	+	698
MSTRG.216.11	intronic_lncRNA	Cp4.1LG00	-	442
MSTRG.13817.1	lincRNA	Cp4.1LG06	+	470
MSTRG.1598.1	lincRNA	Cp4.1LG00	-	1010
MSTRG.28762.1	lincRNA	Cp4.1LG18	+	255
MSTRG.20821.1	lincRNA	Cp4.1LG11	-	658
MSTRG.28098.1	anti-sense-lncRNA	Cp4.1LG18	+	942
MSTRG.15431.1	lincRNA	Cp4.1LG07	+	812
MSTRG.16114.1	intronic_lncRNA	Cp4.1LG08	+	351
MSTRG.14125.1	lincRNA	Cp4.1LG06	+	216
MSTRG.2082.1	lincRNA	Cp4.1LG00	+	902
MSTRG.16105.11	lincRNA	Cp4.1LG08	+	372
MSTRG.21292.6	sense-lncRNA	Cp4.1LG12	-	1470
MSTRG.15204.1	lincRNA	Cp4.1LG07	+	595
MSTRG.9250.2	lincRNA	Cp4.1LG03	-	904
MSTRG.25054.1	lincRNA	Cp4.1LG15	-	356
MSTRG.30488.2	anti-sense-lncRNA	Cp4.1LG20	+	830
MSTRG.21471.1	intronic_lncRNA	Cp4.1LG12	-	366
MSTRG.22380.1	anti-sense-lncRNA	Cp4.1LG13	-	1145
MSTRG.25766.5	sense-lncRNA	Cp4.1LG16	+	1325
MSTRG.4486.1	lincRNA	Cp4.1LG01	+	684
MSTRG.23672.6	lincRNA	Cp4.1LG14	-	675
MSTRG.28686.1	lincRNA	Cp4.1LG18	+	666
MSTRG.27524.2	intronic_lncRNA	Cp4.1LG17	-	547
MSTRG.28570.4	lincRNA	Cp4.1LG18	+	603
MSTRG.13764.9	sense-lncRNA	Cp4.1LG06	-	826
MSTRG.777.1	lincRNA	Cp4.1LG00	+	592
MSTRG.15099.1	intronic_lncRNA	Cp4.1LG07	+	286
MSTRG.20612.1	lincRNA	Cp4.1LG11	-	486
MSTRG.25803.2	lincRNA	Cp4.1LG16	-	350
MSTRG.23230.2	anti-sense-lncRNA	Cp4.1LG13	-	306
MSTRG.23833.8	lincRNA	Cp4.1LG14	-	636
MSTRG.5.6	lincRNA	Cp4.1LG00	-	1586
MSTRG.23375.1	intronic_lncRNA	Cp4.1LG13	-	243
MSTRG.28110.5	anti-sense-lncRNA	Cp4.1LG18	+	1257
MSTRG.23565.11	intronic_lncRNA	Cp4.1LG14	-	660
MSTRG.23956.5	lincRNA	Cp4.1LG14	-	865
MSTRG.26723.1	lincRNA	Cp4.1LG17	+	1330
MSTRG.19080.1	lincRNA	Cp4.1LG10	+	482
MSTRG.6262.1	lincRNA	Cp4.1LG02	+	382
MSTRG.16362.29	intronic_lncRNA	Cp4.1LG08	-	3043
MSTRG.3361.2	sense-lncRNA	Cp4.1LG01	-	808
MSTRG.12927.4	lincRNA	Cp4.1LG05	-	319
MSTRG.9662.1	lincRNA	Cp4.1LG03	-	444
MSTRG.14144.1	intronic_lncRNA	Cp4.1LG06	-	521
MSTRG.5866.20	intronic_lncRNA	Cp4.1LG01	-	1126
MSTRG.11907.9	lincRNA	Cp4.1LG05	-	1103
MSTRG.9977.6	anti-sense-lncRNA	Cp4.1LG04	+	916
MSTRG.22310.1	intronic_lncRNA	Cp4.1LG13	-	601
MSTRG.25951.4	intronic_lncRNA	Cp4.1LG16	-	408
MSTRG.8696.2	intronic_lncRNA	Cp4.1LG03	-	831
MSTRG.21275.1	lincRNA	Cp4.1LG12	-	314
MSTRG.11051.1	lincRNA	Cp4.1LG04	+	742
MSTRG.6918.1	lincRNA	Cp4.1LG02	-	416
MSTRG.18897.4	sense-lncRNA	Cp4.1LG10	+	830
MSTRG.12000.2	lincRNA	Cp4.1LG05	-	557
MSTRG.12749.3	sense-lncRNA	Cp4.1LG05	+	819
MSTRG.29002.2	lincRNA	Cp4.1LG19	+	572
MSTRG.4121.1	anti-sense-lncRNA	Cp4.1LG01	+	882
MSTRG.5025.1	lincRNA	Cp4.1LG01	-	2302
MSTRG.1652.2	lincRNA	Cp4.1LG00	-	868
MSTRG.792.2	lincRNA	Cp4.1LG00	+	203
MSTRG.26590.9	sense-lncRNA	Cp4.1LG16	-	263
MSTRG.2333.1	lincRNA	Cp4.1LG00	-	269
MSTRG.6417.1	lincRNA	Cp4.1LG02	-	1479
MSTRG.16842.7	intronic_lncRNA	Cp4.1LG08	+	921
MSTRG.3981.9	intronic_lncRNA	Cp4.1LG01	-	253
MSTRG.8683.3	sense-lncRNA	Cp4.1LG03	-	1392
MSTRG.22152.1	lincRNA	Cp4.1LG12	-	624
MSTRG.15580.3	sense-lncRNA	Cp4.1LG07	-	570
MSTRG.10261.1	lincRNA	Cp4.1LG04	+	362
MSTRG.58.1	intronic_lncRNA	Cp4.1LG00	+	513
MSTRG.18893.1	lincRNA	Cp4.1LG10	+	308
MSTRG.394.2	lincRNA	Cp4.1LG00	-	214
MSTRG.27460.1	intronic_lncRNA	Cp4.1LG17	-	215
MSTRG.5069.1	intronic_lncRNA	Cp4.1LG01	+	609
MSTRG.24359.2	lincRNA	Cp4.1LG14	+	451
MSTRG.2226.1	lincRNA	Cp4.1LG00	-	634
MSTRG.26497.1	intronic_lncRNA	Cp4.1LG16	-	271
MSTRG.13443.1	intronic_lncRNA	Cp4.1LG06	+	322
MSTRG.6237.1	lincRNA	Cp4.1LG02	-	681
MSTRG.2227.1	lincRNA	Cp4.1LG00	-	768
MSTRG.1652.5	lincRNA	Cp4.1LG00	-	702
MSTRG.19209.1	anti-sense-lncRNA	Cp4.1LG10	+	391
MSTRG.20836.6	intronic_lncRNA	Cp4.1LG11	-	1112
MSTRG.26968.3	intronic_lncRNA	Cp4.1LG17	+	603
MSTRG.24669.10	lincRNA	Cp4.1LG14	+	684
MSTRG.22326.15	intronic_lncRNA	Cp4.1LG13	-	397
MSTRG.30481.1	anti-sense-lncRNA	Cp4.1LG20	-	530
MSTRG.1834.1	lincRNA	Cp4.1LG00	-	1000
MSTRG.17429.2	sense-lncRNA	Cp4.1LG09	-	1081
MSTRG.29629.2	lincRNA	Cp4.1LG19	-	381
MSTRG.31113.1	anti-sense-lncRNA	Cp4.1LG20	-	333
MSTRG.19758.1	intronic_lncRNA	Cp4.1LG10	+	697
MSTRG.10607.3	lincRNA	Cp4.1LG04	-	1190
MSTRG.10629.1	anti-sense-lncRNA	Cp4.1LG04	+	837
MSTRG.27216.3	intronic_lncRNA	Cp4.1LG17	-	567
MSTRG.30684.1	lincRNA	Cp4.1LG20	+	815
MSTRG.28493.2	lincRNA	Cp4.1LG18	-	1483
MSTRG.1621.1	lincRNA	Cp4.1LG00	+	385
MSTRG.21589.1	lincRNA	Cp4.1LG12	+	261
MSTRG.30003.5	lincRNA	Cp4.1LG19	-	428
MSTRG.8281.1	intronic_lncRNA	Cp4.1LG03	-	696
MSTRG.14881.1	intronic_lncRNA	Cp4.1LG07	-	260
MSTRG.20234.1	anti-sense-lncRNA	Cp4.1LG11	-	384
MSTRG.25538.9	intronic_lncRNA	Cp4.1LG15	-	357
MSTRG.4189.5	anti-sense-lncRNA	Cp4.1LG01	-	653
MSTRG.26925.1	anti-sense-lncRNA	Cp4.1LG17	-	670
MSTRG.16727.1	intronic_lncRNA	Cp4.1LG08	-	391
MSTRG.31118.5	lincRNA	Cp4.1LG20	-	479
MSTRG.8484.3	intronic_lncRNA	Cp4.1LG03	-	605
MSTRG.17797.2	intronic_lncRNA	Cp4.1LG09	-	359
MSTRG.6417.3	lincRNA	Cp4.1LG02	-	1163
MSTRG.10527.20	intronic_lncRNA	Cp4.1LG04	-	220
MSTRG.26477.5	lincRNA	Cp4.1LG16	-	1447
MSTRG.16834.1	anti-sense-lncRNA	Cp4.1LG08	-	695
MSTRG.1515.2	lincRNA	Cp4.1LG00	-	549
MSTRG.5794.3	intronic_lncRNA	Cp4.1LG01	+	813
MSTRG.31162.2	sense-lncRNA	Cp4.1LG20	-	345
MSTRG.10990.1	lincRNA	Cp4.1LG04	-	593
MSTRG.5430.1	intronic_lncRNA	Cp4.1LG01	-	506
MSTRG.4629.1	anti-sense-lncRNA	Cp4.1LG01	+	557
MSTRG.18995.1	anti-sense-lncRNA	Cp4.1LG10	+	566
MSTRG.31167.1	sense-lncRNA	Cp4.1LG20	-	520
MSTRG.30909.1	lincRNA	Cp4.1LG20	+	295
MSTRG.5663.4	sense-lncRNA	Cp4.1LG01	+	951
MSTRG.21479.2	lincRNA	Cp4.1LG12	+	349
MSTRG.26185.1	anti-sense-lncRNA	Cp4.1LG16	-	630
MSTRG.13854.6	intronic_lncRNA	Cp4.1LG06	-	638
MSTRG.4041.2	lincRNA	Cp4.1LG01	+	950
MSTRG.16770.1	sense-lncRNA	Cp4.1LG08	-	1017
MSTRG.9253.1	anti-sense-lncRNA	Cp4.1LG03	+	2487
MSTRG.16373.1	lincRNA	Cp4.1LG08	-	1421
MSTRG.1537.3	lincRNA	Cp4.1LG00	-	895
MSTRG.29765.1	lincRNA	Cp4.1LG19	-	366
MSTRG.7146.1	lincRNA	Cp4.1LG02	-	946
MSTRG.13122.1	anti-sense-lncRNA	Cp4.1LG05	-	370
MSTRG.17933.1	lincRNA	Cp4.1LG09	+	487
MSTRG.30184.1	lincRNA	Cp4.1LG19	+	369
MSTRG.22367.1	lincRNA	Cp4.1LG13	+	1275
MSTRG.31117.1	anti-sense-lncRNA	Cp4.1LG20	-	263
MSTRG.19620.15	intronic_lncRNA	Cp4.1LG10	+	976
MSTRG.24553.1	lincRNA	Cp4.1LG14	-	275
MSTRG.30913.1	lincRNA	Cp4.1LG20	+	226
MSTRG.11972.13	intronic_lncRNA	Cp4.1LG05	+	279
MSTRG.1796.4	lincRNA	Cp4.1LG00	+	715
MSTRG.24765.3	lincRNA	Cp4.1LG15	-	873
MSTRG.2137.1	lincRNA	Cp4.1LG00	+	455
MSTRG.25475.63	lincRNA	Cp4.1LG15	-	1020
MSTRG.5481.3	lincRNA	Cp4.1LG01	-	790
MSTRG.1560.1	lincRNA	Cp4.1LG00	-	605
MSTRG.5868.1	intronic_lncRNA	Cp4.1LG01	-	742
MSTRG.6779.4	anti-sense-lncRNA	Cp4.1LG02	-	1239
MSTRG.25680.2	sense-lncRNA	Cp4.1LG16	+	677
MSTRG.5562.1	anti-sense-lncRNA	Cp4.1LG01	-	955
MSTRG.28541.2	sense-lncRNA	Cp4.1LG18	-	374
MSTRG.30306.1	lincRNA	Cp4.1LG20	-	325
MSTRG.9897.2	lincRNA	Cp4.1LG04	-	382
MSTRG.11170.11	sense-lncRNA	Cp4.1LG04	-	578
MSTRG.13462.3	anti-sense-lncRNA	Cp4.1LG06	-	1554
MSTRG.22995.1	lincRNA	Cp4.1LG13	+	394
MSTRG.1506.2	lincRNA	Cp4.1LG00	-	488
MSTRG.19203.2	anti-sense-lncRNA	Cp4.1LG10	-	622
MSTRG.25290.8	intronic_lncRNA	Cp4.1LG15	+	285
MSTRG.12770.2	sense-lncRNA	Cp4.1LG05	-	625
MSTRG.1633.1	lincRNA	Cp4.1LG00	-	450
MSTRG.3586.1	anti-sense-lncRNA	Cp4.1LG01	+	845
MSTRG.2294.2	lincRNA	Cp4.1LG00	-	674
MSTRG.28469.2	intronic_lncRNA	Cp4.1LG18	+	339
MSTRG.7076.1	intronic_lncRNA	Cp4.1LG02	-	977
MSTRG.20351.1	lincRNA	Cp4.1LG11	+	522
MSTRG.13950.8	sense-lncRNA	Cp4.1LG06	+	696
MSTRG.26421.1	anti-sense-lncRNA	Cp4.1LG16	+	613
MSTRG.8701.15	intronic_lncRNA	Cp4.1LG03	-	666
MSTRG.7145.1	lincRNA	Cp4.1LG02	-	988
MSTRG.9301.5	intronic_lncRNA	Cp4.1LG03	+	399
MSTRG.23801.1	lincRNA	Cp4.1LG14	-	1026
MSTRG.16869.4	intronic_lncRNA	Cp4.1LG08	+	646
MSTRG.3581.6	sense-lncRNA	Cp4.1LG01	+	424
MSTRG.25240.7	sense-lncRNA	Cp4.1LG15	+	485
MSTRG.26364.1	lincRNA	Cp4.1LG16	-	316
MSTRG.5481.4	lincRNA	Cp4.1LG01	-	888
MSTRG.14306.1	lincRNA	Cp4.1LG06	-	565
MSTRG.29488.1	lincRNA	Cp4.1LG19	+	305
MSTRG.5146.1	intronic_lncRNA	Cp4.1LG01	+	318
MSTRG.28192.1	anti-sense-lncRNA	Cp4.1LG18	+	1066
MSTRG.16395.1	intronic_lncRNA	Cp4.1LG08	-	844
MSTRG.1770.4	lincRNA	Cp4.1LG00	+	1286
MSTRG.8204.1	intronic_lncRNA	Cp4.1LG03	-	327
MSTRG.22137.1	lincRNA	Cp4.1LG12	+	289
MSTRG.26730.1	anti-sense-lncRNA	Cp4.1LG17	-	552
MSTRG.10379.5	intronic_lncRNA	Cp4.1LG04	+	2597
MSTRG.21249.1	lincRNA	Cp4.1LG12	-	1043
MSTRG.18938.1	lincRNA	Cp4.1LG10	+	265
MSTRG.28877.1	anti-sense-lncRNA	Cp4.1LG18	-	821
MSTRG.12495.10	intronic_lncRNA	Cp4.1LG05	-	587
MSTRG.13755.5	intronic_lncRNA	Cp4.1LG06	-	783
MSTRG.5120.1	intronic_lncRNA	Cp4.1LG01	+	1501
MSTRG.30818.2	sense-lncRNA	Cp4.1LG20	+	681
MSTRG.1389.5	lincRNA	Cp4.1LG00	-	1465
MSTRG.22603.1	sense-lncRNA	Cp4.1LG13	+	458
MSTRG.28695.1	anti-sense-lncRNA	Cp4.1LG18	+	641
MSTRG.21292.7	sense-lncRNA	Cp4.1LG12	-	1373
MSTRG.13256.1	anti-sense-lncRNA	Cp4.1LG06	+	1281
MSTRG.27979.1	anti-sense-lncRNA	Cp4.1LG18	+	548
MSTRG.23833.1	lincRNA	Cp4.1LG14	-	1834
MSTRG.21292.8	sense-lncRNA	Cp4.1LG12	-	2014
MSTRG.22477.1	lincRNA	Cp4.1LG13	+	1280
MSTRG.11596.1	anti-sense-lncRNA	Cp4.1LG05	+	419
MSTRG.19635.1	lincRNA	Cp4.1LG10	+	403
MSTRG.14692.7	lincRNA	Cp4.1LG07	-	713
MSTRG.3818.9	sense-lncRNA	Cp4.1LG01	+	801
MSTRG.15931.1	lincRNA	Cp4.1LG08	+	329
MSTRG.5481.2	lincRNA	Cp4.1LG01	-	637
MSTRG.21613.9	intronic_lncRNA	Cp4.1LG12	+	616
MSTRG.2422.2	lincRNA	Cp4.1LG00	-	492
MSTRG.17767.16	intronic_lncRNA	Cp4.1LG09	-	493
MSTRG.25720.1	lincRNA	Cp4.1LG16	-	683
MSTRG.5520.6	sense-lncRNA	Cp4.1LG01	-	383
MSTRG.14554.1	lincRNA	Cp4.1LG07	+	730
MSTRG.21634.1	anti-sense-lncRNA	Cp4.1LG12	-	602
MSTRG.30999.1	lincRNA	Cp4.1LG20	+	526
MSTRG.2099.1	lincRNA	Cp4.1LG00	-	402
MSTRG.17103.1	intronic_lncRNA	Cp4.1LG08	+	291
MSTRG.14676.7	lincRNA	Cp4.1LG07	-	533
MSTRG.10375.1	anti-sense-lncRNA	Cp4.1LG04	+	1017
MSTRG.30401.1	anti-sense-lncRNA	Cp4.1LG20	+	301
MSTRG.18690.8	intronic_lncRNA	Cp4.1LG10	-	1906
MSTRG.20345.14	sense-lncRNA	Cp4.1LG11	+	465
MSTRG.21741.1	lincRNA	Cp4.1LG12	+	1095
MSTRG.12813.4	intronic_lncRNA	Cp4.1LG05	-	1397
MSTRG.7618.2	lincRNA	Cp4.1LG02	+	678
MSTRG.21455.1	intronic_lncRNA	Cp4.1LG12	-	563
MSTRG.2031.1	lincRNA	Cp4.1LG00	+	527
MSTRG.17095.1	lincRNA	Cp4.1LG08	-	724
MSTRG.13710.1	lincRNA	Cp4.1LG06	+	571
MSTRG.15562.2	anti-sense-lncRNA	Cp4.1LG07	+	356
MSTRG.28915.5	intronic_lncRNA	Cp4.1LG18	-	781
MSTRG.28541.1	sense-lncRNA	Cp4.1LG18	-	529
MSTRG.21835.1	lincRNA	Cp4.1LG12	+	330
MSTRG.24555.1	lincRNA	Cp4.1LG14	-	393
MSTRG.23833.3	lincRNA	Cp4.1LG14	-	1141
MSTRG.6816.1	lincRNA	Cp4.1LG02	-	439
MSTRG.2072.2	lincRNA	Cp4.1LG00	+	973
MSTRG.10700.1	lincRNA	Cp4.1LG04	+	695
MSTRG.12060.1	intronic_lncRNA	Cp4.1LG05	+	442
MSTRG.6172.6	intronic_lncRNA	Cp4.1LG02	+	433
MSTRG.28042.2	lincRNA	Cp4.1LG18	-	415
MSTRG.21269.3	lincRNA	Cp4.1LG12	+	1542
MSTRG.22322.1	anti-sense-lncRNA	Cp4.1LG13	+	277
MSTRG.3915.1	lincRNA	Cp4.1LG01	-	501
MSTRG.7112.1	lincRNA	Cp4.1LG02	-	277
MSTRG.9250.3	lincRNA	Cp4.1LG03	-	443
MSTRG.7737.1	anti-sense-lncRNA	Cp4.1LG02	+	806
MSTRG.14831.1	lincRNA	Cp4.1LG07	+	382
MSTRG.27579.2	lincRNA	Cp4.1LG17	+	295
MSTRG.29580.5	intronic_lncRNA	Cp4.1LG19	-	597
MSTRG.10524.1	lincRNA	Cp4.1LG04	-	274
MSTRG.6617.1	lincRNA	Cp4.1LG02	-	258
MSTRG.5369.15	intronic_lncRNA	Cp4.1LG01	+	371
MSTRG.5927.1	anti-sense-lncRNA	Cp4.1LG02	+	298
MSTRG.20137.4	sense-lncRNA	Cp4.1LG11	+	766
MSTRG.14269.1	intronic_lncRNA	Cp4.1LG06	-	220
MSTRG.6556.3	sense-lncRNA	Cp4.1LG02	-	423
MSTRG.2581.1	lincRNA	Cp4.1LG00	-	355
MSTRG.7138.3	lincRNA	Cp4.1LG02	-	758
MSTRG.8470.1	lincRNA	Cp4.1LG03	-	1128
MSTRG.7658.2	lincRNA	Cp4.1LG02	+	802
MSTRG.18899.1	lincRNA	Cp4.1LG10	+	211
MSTRG.22352.3	sense-lncRNA	Cp4.1LG13	+	885
MSTRG.19596.1	intronic_lncRNA	Cp4.1LG10	+	337
MSTRG.21736.1	intronic_lncRNA	Cp4.1LG12	-	354
MSTRG.14314.1	intronic_lncRNA	Cp4.1LG06	+	216
MSTRG.773.1	lincRNA	Cp4.1LG00	+	203
MSTRG.18008.1	lincRNA	Cp4.1LG09	+	400
MSTRG.19257.2	sense-lncRNA	Cp4.1LG10	-	582
MSTRG.10886.1	anti-sense-lncRNA	Cp4.1LG04	-	542
MSTRG.6508.1	lincRNA	Cp4.1LG02	+	476
MSTRG.12782.1	lincRNA	Cp4.1LG05	+	355
MSTRG.30244.1	lincRNA	Cp4.1LG20	+	771
MSTRG.16844.1	lincRNA	Cp4.1LG08	-	369
MSTRG.13117.4	lincRNA	Cp4.1LG05	-	288
MSTRG.5817.3	lincRNA	Cp4.1LG01	+	570
MSTRG.26467.1	anti-sense-lncRNA	Cp4.1LG16	-	459
MSTRG.382.3	lincRNA	Cp4.1LG00	-	706
MSTRG.21912.1	lincRNA	Cp4.1LG12	-	321
MSTRG.13271.1	lincRNA	Cp4.1LG06	-	1071
MSTRG.5072.1	intronic_lncRNA	Cp4.1LG01	+	584
MSTRG.22974.1	sense-lncRNA	Cp4.1LG13	-	426
MSTRG.5872.8	lincRNA	Cp4.1LG02	-	468
MSTRG.14901.1	lincRNA	Cp4.1LG07	-	279
MSTRG.11062.1	anti-sense-lncRNA	Cp4.1LG04	-	417
MSTRG.1537.4	lincRNA	Cp4.1LG00	-	742
MSTRG.3187.1	intronic_lncRNA	Cp4.1LG01	-	321
MSTRG.11440.13	intronic_lncRNA	Cp4.1LG04	-	300
MSTRG.21253.9	sense-lncRNA	Cp4.1LG12	-	2179
MSTRG.13871.19	lincRNA	Cp4.1LG06	-	2585
MSTRG.7266.4	lincRNA	Cp4.1LG02	+	483
MSTRG.13445.3	sense-lncRNA	Cp4.1LG06	+	519
MSTRG.18257.1	anti-sense-lncRNA	Cp4.1LG09	-	376
MSTRG.12432.3	lincRNA	Cp4.1LG05	-	801
MSTRG.1666.1	lincRNA	Cp4.1LG00	+	650
MSTRG.29862.1	lincRNA	Cp4.1LG19	-	471
MSTRG.25475.51	lincRNA	Cp4.1LG15	-	1275
MSTRG.20195.1	sense-lncRNA	Cp4.1LG11	+	362
MSTRG.24810.5	intronic_lncRNA	Cp4.1LG15	-	497
MSTRG.7190.3	lincRNA	Cp4.1LG02	-	1565
MSTRG.7457.6	intronic_lncRNA	Cp4.1LG02	+	604
MSTRG.941.2	intronic_lncRNA	Cp4.1LG00	-	1711
MSTRG.23833.5	lincRNA	Cp4.1LG14	-	614
MSTRG.24457.3	lincRNA	Cp4.1LG14	+	3588
MSTRG.28541.3	sense-lncRNA	Cp4.1LG18	-	542
MSTRG.15153.18	sense-lncRNA	Cp4.1LG07	+	1370
MSTRG.23636.10	anti-sense-lncRNA	Cp4.1LG14	-	770
MSTRG.24556.1	lincRNA	Cp4.1LG14	-	395
MSTRG.23800.1	lincRNA	Cp4.1LG14	-	545
MSTRG.13462.1	anti-sense-lncRNA	Cp4.1LG06	-	1684
MSTRG.9488.6	intronic_lncRNA	Cp4.1LG03	+	243
MSTRG.14647.1	sense-lncRNA	Cp4.1LG07	+	674
MSTRG.31167.3	sense-lncRNA	Cp4.1LG20	-	519
MSTRG.19337.1	anti-sense-lncRNA	Cp4.1LG10	+	831
MSTRG.14680.4	intronic_lncRNA	Cp4.1LG07	+	222
MSTRG.1937.1	lincRNA	Cp4.1LG00	-	544
MSTRG.17833.1	lincRNA	Cp4.1LG09	+	346
MSTRG.8747.1	anti-sense-lncRNA	Cp4.1LG03	-	356
MSTRG.25634.1	intronic_lncRNA	Cp4.1LG15	-	673
MSTRG.25128.6	sense-lncRNA	Cp4.1LG15	+	1352
MSTRG.16481.4	lincRNA	Cp4.1LG08	+	427
MSTRG.9264.2	intronic_lncRNA	Cp4.1LG03	+	654
MSTRG.17423.4	anti-sense-lncRNA	Cp4.1LG09	-	853
MSTRG.12648.10	anti-sense-lncRNA	Cp4.1LG05	-	1237
MSTRG.24170.2	lincRNA	Cp4.1LG14	+	544
MSTRG.21059.1	lincRNA	Cp4.1LG12	-	427
MSTRG.14420.7	anti-sense-lncRNA	Cp4.1LG07	-	490
MSTRG.18925.9	intronic_lncRNA	Cp4.1LG10	+	523
MSTRG.24310.3	intronic_lncRNA	Cp4.1LG14	-	447
MSTRG.4221.1	lincRNA	Cp4.1LG01	-	347
MSTRG.3764.1	lincRNA	Cp4.1LG01	+	373
MSTRG.5025.5	lincRNA	Cp4.1LG01	-	1952
MSTRG.15270.1	intronic_lncRNA	Cp4.1LG07	+	376
MSTRG.20829.1	lincRNA	Cp4.1LG11	+	225
MSTRG.4397.1	anti-sense-lncRNA	Cp4.1LG01	+	436
MSTRG.28172.1	lincRNA	Cp4.1LG18	-	379
MSTRG.18578.1	anti-sense-lncRNA	Cp4.1LG10	-	427
MSTRG.4284.3	anti-sense-lncRNA	Cp4.1LG01	+	644
MSTRG.25475.47	lincRNA	Cp4.1LG15	-	1206
MSTRG.24833.1	lincRNA	Cp4.1LG15	-	434
MSTRG.15484.4	sense-lncRNA	Cp4.1LG07	+	725
MSTRG.676.2	lincRNA	Cp4.1LG00	+	872
MSTRG.25721.3	lincRNA	Cp4.1LG16	-	1350
MSTRG.4764.1	lincRNA	Cp4.1LG01	-	362
MSTRG.26257.1	intronic_lncRNA	Cp4.1LG16	-	307
MSTRG.4041.5	lincRNA	Cp4.1LG01	+	1609
MSTRG.1142.1	lincRNA	Cp4.1LG00	-	547
MSTRG.14353.1	lincRNA	Cp4.1LG06	+	633
MSTRG.16824.1	lincRNA	Cp4.1LG08	-	218
MSTRG.25651.1	anti-sense-lncRNA	Cp4.1LG15	+	241
MSTRG.22.13	lincRNA	Cp4.1LG00	+	507
MSTRG.12307.1	intronic_lncRNA	Cp4.1LG05	+	401
MSTRG.9972.1	lincRNA	Cp4.1LG04	-	368
MSTRG.14311.2	lincRNA	Cp4.1LG06	-	965
MSTRG.10379.8	intronic_lncRNA	Cp4.1LG04	+	1530
MSTRG.28543.1	lincRNA	Cp4.1LG18	+	398
MSTRG.26926.1	lincRNA	Cp4.1LG17	-	216
MSTRG.23431.13	lincRNA	Cp4.1LG13	-	4518
MSTRG.11758.6	intronic_lncRNA	Cp4.1LG05	+	234
MSTRG.29869.1	lincRNA	Cp4.1LG19	+	363
MSTRG.8037.1	lincRNA	Cp4.1LG03	+	626
MSTRG.12314.5	lincRNA	Cp4.1LG05	-	368
MSTRG.18442.1	lincRNA	Cp4.1LG10	+	893
MSTRG.20346.1	intronic_lncRNA	Cp4.1LG11	+	718
MSTRG.28570.5	lincRNA	Cp4.1LG18	+	950
MSTRG.1799.1	lincRNA	Cp4.1LG00	+	228
MSTRG.11173.2	sense-lncRNA	Cp4.1LG04	-	949
MSTRG.19092.1	anti-sense-lncRNA	Cp4.1LG10	-	348
MSTRG.2846.2	lincRNA	Cp4.1LG00	+	205
MSTRG.27500.1	lincRNA	Cp4.1LG17	+	298
MSTRG.24842.1	intronic_lncRNA	Cp4.1LG15	-	402
MSTRG.8866.1	lincRNA	Cp4.1LG03	-	251
MSTRG.21253.8	sense-lncRNA	Cp4.1LG12	-	1120
MSTRG.25453.1	anti-sense-lncRNA	Cp4.1LG15	-	305
MSTRG.61.1	intronic_lncRNA	Cp4.1LG00	+	484
MSTRG.21863.1	anti-sense-lncRNA	Cp4.1LG12	+	418
MSTRG.15851.3	anti-sense-lncRNA	Cp4.1LG08	+	711
MSTRG.21379.1	lincRNA	Cp4.1LG12	+	896
MSTRG.19930.2	sense-lncRNA	Cp4.1LG11	-	1221
MSTRG.16553.4	sense-lncRNA	Cp4.1LG08	+	447
MSTRG.27083.5	lincRNA	Cp4.1LG17	+	1816
MSTRG.3880.1	lincRNA	Cp4.1LG01	-	982
MSTRG.26533.1	lincRNA	Cp4.1LG16	+	344
MSTRG.26386.1	lincRNA	Cp4.1LG16	-	556
MSTRG.22436.1	anti-sense-lncRNA	Cp4.1LG13	-	297
MSTRG.24775.2	lincRNA	Cp4.1LG15	-	487
MSTRG.4651.8	intronic_lncRNA	Cp4.1LG01	-	2408
MSTRG.15720.1	anti-sense-lncRNA	Cp4.1LG08	-	206
MSTRG.6326.14	lincRNA	Cp4.1LG02	-	625
MSTRG.1420.1	lincRNA	Cp4.1LG00	-	336
MSTRG.11003.1	anti-sense-lncRNA	Cp4.1LG04	-	748
MSTRG.19321.5	intronic_lncRNA	Cp4.1LG10	-	505
MSTRG.20759.1	anti-sense-lncRNA	Cp4.1LG11	-	415
MSTRG.28155.1	intronic_lncRNA	Cp4.1LG18	-	398
MSTRG.13863.5	sense-lncRNA	Cp4.1LG06	+	603
MSTRG.17020.1	anti-sense-lncRNA	Cp4.1LG08	+	241
MSTRG.2645.1	lincRNA	Cp4.1LG00	-	276
MSTRG.11719.1	intronic_lncRNA	Cp4.1LG05	+	283
MSTRG.4385.1	anti-sense-lncRNA	Cp4.1LG01	-	621
MSTRG.10455.1	anti-sense-lncRNA	Cp4.1LG04	-	416
MSTRG.28006.1	lincRNA	Cp4.1LG18	+	234
MSTRG.19635.2	lincRNA	Cp4.1LG10	+	286
MSTRG.16554.1	intronic_lncRNA	Cp4.1LG08	+	245
MSTRG.12801.6	intronic_lncRNA	Cp4.1LG05	-	516
MSTRG.21861.4	lincRNA	Cp4.1LG12	-	1272
MSTRG.28355.1	lincRNA	Cp4.1LG18	+	337
MSTRG.5817.1	lincRNA	Cp4.1LG01	+	597
MSTRG.30368.4	intronic_lncRNA	Cp4.1LG20	+	364
MSTRG.9104.1	intronic_lncRNA	Cp4.1LG03	-	562
MSTRG.5439.1	lincRNA	Cp4.1LG01	-	265
MSTRG.144.1	intronic_lncRNA	Cp4.1LG00	-	749
MSTRG.7563.1	anti-sense-lncRNA	Cp4.1LG02	-	575
MSTRG.10676.1	lincRNA	Cp4.1LG04	-	317
MSTRG.16392.1	anti-sense-lncRNA	Cp4.1LG08	+	416
MSTRG.17849.3	lincRNA	Cp4.1LG09	-	1693
MSTRG.13052.1	sense-lncRNA	Cp4.1LG05	+	955
MSTRG.29503.1	intronic_lncRNA	Cp4.1LG19	-	366
MSTRG.23833.6	lincRNA	Cp4.1LG14	-	699
MSTRG.26202.1	lincRNA	Cp4.1LG16	-	243
MSTRG.13033.2	lincRNA	Cp4.1LG05	+	1548
MSTRG.25241.1	intronic_lncRNA	Cp4.1LG15	+	349
MSTRG.27614.1	anti-sense-lncRNA	Cp4.1LG17	-	950
MSTRG.12018.1	anti-sense-lncRNA	Cp4.1LG05	-	625
MSTRG.12324.1	intronic_lncRNA	Cp4.1LG05	+	237
MSTRG.13787.1	lincRNA	Cp4.1LG06	+	473
MSTRG.4638.1	lincRNA	Cp4.1LG01	+	510
MSTRG.2000.1	lincRNA	Cp4.1LG00	+	341
MSTRG.20301.1	intronic_lncRNA	Cp4.1LG11	+	344
MSTRG.21269.5	lincRNA	Cp4.1LG12	+	1405
MSTRG.18310.1	anti-sense-lncRNA	Cp4.1LG09	+	357
MSTRG.8169.3	sense-lncRNA	Cp4.1LG03	+	509
MSTRG.15187.4	intronic_lncRNA	Cp4.1LG07	+	477
MSTRG.14056.1	intronic_lncRNA	Cp4.1LG06	+	266
MSTRG.14142.1	lincRNA	Cp4.1LG06	-	283
MSTRG.5025.3	lincRNA	Cp4.1LG01	-	1925
MSTRG.14420.6	lincRNA	Cp4.1LG07	-	261
MSTRG.16628.6	sense-lncRNA	Cp4.1LG08	+	1136
MSTRG.792.4	lincRNA	Cp4.1LG00	+	295
MSTRG.1245.1	lincRNA	Cp4.1LG00	-	295
MSTRG.3538.1	intronic_lncRNA	Cp4.1LG01	-	513
MSTRG.3791.2	lincRNA	Cp4.1LG01	+	743
MSTRG.15188.1	intronic_lncRNA	Cp4.1LG07	+	428
MSTRG.10461.7	intronic_lncRNA	Cp4.1LG04	-	1278
MSTRG.19090.1	anti-sense-lncRNA	Cp4.1LG10	-	548
MSTRG.5858.1	intronic_lncRNA	Cp4.1LG01	-	782
MSTRG.24806.7	intronic_lncRNA	Cp4.1LG15	-	507
MSTRG.12040.1	anti-sense-lncRNA	Cp4.1LG05	+	558
MSTRG.12138.2	intronic_lncRNA	Cp4.1LG05	-	1098
MSTRG.4795.4	sense-lncRNA	Cp4.1LG01	+	514
MSTRG.878.3	lincRNA	Cp4.1LG00	-	3483
MSTRG.29656.1	anti-sense-lncRNA	Cp4.1LG19	+	538
MSTRG.6227.1	intronic_lncRNA	Cp4.1LG02	-	226
MSTRG.19354.2	lincRNA	Cp4.1LG10	+	812
MSTRG.20320.4	sense-lncRNA	Cp4.1LG11	-	553
MSTRG.19198.1	anti-sense-lncRNA	Cp4.1LG10	+	366
MSTRG.30133.1	lincRNA	Cp4.1LG19	-	358
MSTRG.24544.1	intronic_lncRNA	Cp4.1LG14	-	267
MSTRG.29488.2	lincRNA	Cp4.1LG19	+	333
MSTRG.14959.6	intronic_lncRNA	Cp4.1LG07	+	266
MSTRG.649.2	sense-lncRNA	Cp4.1LG00	-	263
MSTRG.6005.3	anti-sense-lncRNA	Cp4.1LG02	-	742
MSTRG.15909.1	lincRNA	Cp4.1LG08	+	444
MSTRG.21448.1	intronic_lncRNA	Cp4.1LG12	-	487
MSTRG.27137.1	lincRNA	Cp4.1LG17	-	294
MSTRG.14651.2	lincRNA	Cp4.1LG07	+	958
MSTRG.6504.11	sense-lncRNA	Cp4.1LG02	+	2448
MSTRG.27080.1	lincRNA	Cp4.1LG17	-	293
MSTRG.10458.1	lincRNA	Cp4.1LG04	-	612
MSTRG.21177.1	intronic_lncRNA	Cp4.1LG12	-	1353
MSTRG.2246.1	lincRNA	Cp4.1LG00	-	249
MSTRG.5080.1	lincRNA	Cp4.1LG01	-	586
MSTRG.3581.5	sense-lncRNA	Cp4.1LG01	+	426
MSTRG.2227.2	lincRNA	Cp4.1LG00	-	606
MSTRG.20702.2	lincRNA	Cp4.1LG11	-	494
MSTRG.7321.1	lincRNA	Cp4.1LG02	+	313
MSTRG.12152.1	lincRNA	Cp4.1LG05	+	302
MSTRG.1907.1	lincRNA	Cp4.1LG00	-	326
MSTRG.9337.15	sense-lncRNA	Cp4.1LG03	-	488
MSTRG.23776.1	anti-sense-lncRNA	Cp4.1LG14	+	356
MSTRG.21292.5	sense-lncRNA	Cp4.1LG12	-	1474
MSTRG.19424.28	sense-lncRNA	Cp4.1LG10	+	888
MSTRG.9459.1	lincRNA	Cp4.1LG03	+	393
MSTRG.27999.1	lincRNA	Cp4.1LG18	+	672
MSTRG.28729.2	lincRNA	Cp4.1LG18	-	1820
MSTRG.10363.1	lincRNA	Cp4.1LG04	+	827
MSTRG.10512.2	lincRNA	Cp4.1LG04	-	605
MSTRG.27815.1	lincRNA	Cp4.1LG17	-	274
MSTRG.10419.1	anti-sense-lncRNA	Cp4.1LG04	-	741
MSTRG.4579.2	sense-lncRNA	Cp4.1LG01	-	672
MSTRG.12906.2	sense-lncRNA	Cp4.1LG05	-	2322
MSTRG.24959.1	lincRNA	Cp4.1LG15	-	721
MSTRG.25870.3	lincRNA	Cp4.1LG16	-	611
MSTRG.29549.8	sense-lncRNA	Cp4.1LG19	-	656
MSTRG.26013.3	anti-sense-lncRNA	Cp4.1LG16	-	646
MSTRG.25687.1	lincRNA	Cp4.1LG16	-	282
MSTRG.25870.1	lincRNA	Cp4.1LG16	-	1057
MSTRG.3411.1	intronic_lncRNA	Cp4.1LG01	-	385
MSTRG.26688.19	sense-lncRNA	Cp4.1LG16	-	397
MSTRG.786.1	lincRNA	Cp4.1LG00	+	234
MSTRG.6384.1	lincRNA	Cp4.1LG02	-	313
MSTRG.23798.1	intronic_lncRNA	Cp4.1LG14	-	748
MSTRG.30158.1	lincRNA	Cp4.1LG19	+	540
MSTRG.811.1	intronic_lncRNA	Cp4.1LG00	-	273
MSTRG.23384.5	sense-lncRNA	Cp4.1LG13	-	431
MSTRG.24775.1	lincRNA	Cp4.1LG15	-	735
MSTRG.13872.4	sense-lncRNA	Cp4.1LG06	-	349
MSTRG.17315.1	anti-sense-lncRNA	Cp4.1LG09	-	437
MSTRG.16109.1	anti-sense-lncRNA	Cp4.1LG08	+	373
MSTRG.2018.2	lincRNA	Cp4.1LG00	+	1031
MSTRG.666.1	lincRNA	Cp4.1LG00	+	459
MSTRG.3263.3	lincRNA	Cp4.1LG01	+	374
MSTRG.18420.5	sense-lncRNA	Cp4.1LG09	-	725
MSTRG.11754.1	lincRNA	Cp4.1LG05	+	359
MSTRG.7828.1	lincRNA	Cp4.1LG03	-	421
MSTRG.12851.1	lincRNA	Cp4.1LG05	+	512
MSTRG.9402.4	lincRNA	Cp4.1LG03	-	348
MSTRG.25113.1	lincRNA	Cp4.1LG15	-	777
MSTRG.12736.1	lincRNA	Cp4.1LG05	+	402
MSTRG.27383.1	lincRNA	Cp4.1LG17	-	426
MSTRG.13033.3	lincRNA	Cp4.1LG05	+	1214
MSTRG.23242.17	sense-lncRNA	Cp4.1LG13	-	1492
MSTRG.27579.1	lincRNA	Cp4.1LG17	+	215
MSTRG.28700.2	lincRNA	Cp4.1LG18	+	1614
MSTRG.25475.60	lincRNA	Cp4.1LG15	-	948
MSTRG.28809.1	anti-sense-lncRNA	Cp4.1LG18	-	294
MSTRG.19377.2	lincRNA	Cp4.1LG10	-	1976
MSTRG.25475.59	lincRNA	Cp4.1LG15	-	984
MSTRG.29083.17	intronic_lncRNA	Cp4.1LG19	-	577
MSTRG.12670.1	lincRNA	Cp4.1LG05	+	284
MSTRG.20444.7	intronic_lncRNA	Cp4.1LG11	-	264
MSTRG.10363.3	lincRNA	Cp4.1LG04	+	827
MSTRG.60.1	intronic_lncRNA	Cp4.1LG00	+	279
MSTRG.5537.4	sense-lncRNA	Cp4.1LG01	-	483
MSTRG.4076.8	sense-lncRNA	Cp4.1LG01	-	354
MSTRG.3880.2	lincRNA	Cp4.1LG01	-	526
MSTRG.21269.1	lincRNA	Cp4.1LG12	+	692
MSTRG.24406.5	anti-sense-lncRNA	Cp4.1LG14	+	430
MSTRG.28110.6	anti-sense-lncRNA	Cp4.1LG18	+	1090
MSTRG.19312.2	lincRNA	Cp4.1LG10	-	267
MSTRG.5016.1	lincRNA	Cp4.1LG01	+	316
MSTRG.7231.2	intronic_lncRNA	Cp4.1LG02	-	1227
MSTRG.27364.1	lincRNA	Cp4.1LG17	-	355
MSTRG.16172.1	lincRNA	Cp4.1LG08	-	245
MSTRG.10491.1	lincRNA	Cp4.1LG04	+	219
MSTRG.17392.1	lincRNA	Cp4.1LG09	-	566
MSTRG.3908.1	lincRNA	Cp4.1LG01	-	377
MSTRG.17482.1	lincRNA	Cp4.1LG09	+	291
MSTRG.13315.2	lincRNA	Cp4.1LG06	-	868
MSTRG.20917.1	lincRNA	Cp4.1LG11	-	291
MSTRG.27206.1	intronic_lncRNA	Cp4.1LG17	-	235
MSTRG.19907.1	lincRNA	Cp4.1LG11	+	663
MSTRG.2243.1	lincRNA	Cp4.1LG00	-	507
MSTRG.1652.4	lincRNA	Cp4.1LG00	-	693
MSTRG.14356.1	intronic_lncRNA	Cp4.1LG06	+	214
MSTRG.4471.1	intronic_lncRNA	Cp4.1LG01	-	654
MSTRG.25130.1	lincRNA	Cp4.1LG15	-	462
MSTRG.12666.1	anti-sense-lncRNA	Cp4.1LG05	-	421
MSTRG.22086.1	lincRNA	Cp4.1LG12	+	1182
MSTRG.26338.1	lincRNA	Cp4.1LG16	-	346
MSTRG.9512.1	lincRNA	Cp4.1LG03	+	550
MSTRG.7008.1	anti-sense-lncRNA	Cp4.1LG02	-	299
MSTRG.693.2	lincRNA	Cp4.1LG00	-	965
MSTRG.30827.2	lincRNA	Cp4.1LG20	+	1688
MSTRG.17439.3	lincRNA	Cp4.1LG09	+	284
MSTRG.14651.1	lincRNA	Cp4.1LG07	+	857
MSTRG.12813.6	intronic_lncRNA	Cp4.1LG05	-	1216
MSTRG.11054.4	intronic_lncRNA	Cp4.1LG04	+	412
MSTRG.13273.1	lincRNA	Cp4.1LG06	-	826
MSTRG.5534.1	lincRNA	Cp4.1LG01	-	724
MSTRG.27364.2	lincRNA	Cp4.1LG17	-	284
MSTRG.11365.1	lincRNA	Cp4.1LG04	-	380
MSTRG.28296.1	lincRNA	Cp4.1LG18	+	302
MSTRG.24882.1	anti-sense-lncRNA	Cp4.1LG15	+	320
MSTRG.14860.1	anti-sense-lncRNA	Cp4.1LG07	-	525
MSTRG.6079.2	intronic_lncRNA	Cp4.1LG02	+	387
MSTRG.12897.2	intronic_lncRNA	Cp4.1LG05	+	381
MSTRG.28244.1	intronic_lncRNA	Cp4.1LG18	-	476
MSTRG.8036.1	lincRNA	Cp4.1LG03	+	793
MSTRG.22686.1	lincRNA	Cp4.1LG13	+	267
MSTRG.21742.2	anti-sense-lncRNA	Cp4.1LG12	+	689
MSTRG.14150.1	anti-sense-lncRNA	Cp4.1LG06	-	370
MSTRG.27083.1	lincRNA	Cp4.1LG17	+	1723
MSTRG.22093.1	lincRNA	Cp4.1LG12	-	599
MSTRG.10811.1	lincRNA	Cp4.1LG04	-	283
MSTRG.6184.1	lincRNA	Cp4.1LG02	+	751
MSTRG.4041.3	lincRNA	Cp4.1LG01	+	979
MSTRG.11441.1	lincRNA	Cp4.1LG04	-	349
MSTRG.20836.4	sense-lncRNA	Cp4.1LG11	-	1384
MSTRG.22.14	lincRNA	Cp4.1LG00	+	318
MSTRG.17423.3	intronic_lncRNA	Cp4.1LG09	-	697
MSTRG.23956.3	lincRNA	Cp4.1LG14	-	413
MSTRG.22145.1	anti-sense-lncRNA	Cp4.1LG12	-	305
MSTRG.16283.1	lincRNA	Cp4.1LG08	-	338
MSTRG.26713.1	lincRNA	Cp4.1LG17	+	207
MSTRG.19731.1	lincRNA	Cp4.1LG10	+	291
MSTRG.2010.4	lincRNA	Cp4.1LG00	+	372
MSTRG.16754.1	lincRNA	Cp4.1LG08	+	253
MSTRG.11443.1	anti-sense-lncRNA	Cp4.1LG04	-	219
MSTRG.7938.2	sense-lncRNA	Cp4.1LG03	+	293
MSTRG.20461.1	intronic_lncRNA	Cp4.1LG11	-	302
MSTRG.21626.1	lincRNA	Cp4.1LG12	-	226
MSTRG.8695.9	intronic_lncRNA	Cp4.1LG03	-	374
MSTRG.24995.1	lincRNA	Cp4.1LG15	+	294
MSTRG.10827.2	sense-lncRNA	Cp4.1LG04	-	223
MSTRG.20801.3	lincRNA	Cp4.1LG11	+	1346
MSTRG.30048.6	sense-lncRNA	Cp4.1LG19	+	1312
MSTRG.23833.7	lincRNA	Cp4.1LG14	-	797
MSTRG.18052.1	lincRNA	Cp4.1LG09	-	204
MSTRG.11963.1	lincRNA	Cp4.1LG05	-	400
MSTRG.23376.1	lincRNA	Cp4.1LG13	+	264
MSTRG.2846.1	lincRNA	Cp4.1LG00	+	210
MSTRG.2570.1	lincRNA	Cp4.1LG00	+	206
MSTRG.4041.4	lincRNA	Cp4.1LG01	+	956
MSTRG.15991.1	anti-sense-lncRNA	Cp4.1LG08	-	594
MSTRG.25908.1	lincRNA	Cp4.1LG16	-	461
MSTRG.4700.8	sense-lncRNA	Cp4.1LG01	+	683
MSTRG.30158.2	lincRNA	Cp4.1LG19	+	301
MSTRG.26546.1	anti-sense-lncRNA	Cp4.1LG16	+	350
MSTRG.14090.1	lincRNA	Cp4.1LG06	+	251
MSTRG.1738.1	lincRNA	Cp4.1LG00	+	628
MSTRG.1894.1	lincRNA	Cp4.1LG00	+	236
MSTRG.13001.4	sense-lncRNA	Cp4.1LG05	-	423
MSTRG.27922.1	lincRNA	Cp4.1LG18	+	300
MSTRG.7618.4	lincRNA	Cp4.1LG02	+	221
MSTRG.13524.1	lincRNA	Cp4.1LG06	-	324
MSTRG.8368.1	anti-sense-lncRNA	Cp4.1LG03	-	329
MSTRG.26371.12	intronic_lncRNA	Cp4.1LG16	-	434
MSTRG.1798.1	lincRNA	Cp4.1LG00	+	600
MSTRG.11591.1	lincRNA	Cp4.1LG05	+	217
MSTRG.21741.3	lincRNA	Cp4.1LG12	+	828
MSTRG.31028.12	lincRNA	Cp4.1LG20	+	344
MSTRG.12736.2	lincRNA	Cp4.1LG05	+	285
MSTRG.28208.28	lincRNA	Cp4.1LG18	-	218
MSTRG.14419.9	lincRNA	Cp4.1LG07	-	960
MSTRG.5610.1	lincRNA	Cp4.1LG01	-	363
MSTRG.4816.2	sense-lncRNA	Cp4.1LG01	-	539
MSTRG.16414.3	lincRNA	Cp4.1LG08	-	483
MSTRG.26582.4	intronic_lncRNA	Cp4.1LG16	+	504
MSTRG.27801.1	lincRNA	Cp4.1LG17	-	267
MSTRG.27168.1	lincRNA	Cp4.1LG17	+	225
MSTRG.4041.1	lincRNA	Cp4.1LG01	+	878
MSTRG.25309.6	lincRNA	Cp4.1LG15	+	214
MSTRG.748.3	lincRNA	Cp4.1LG00	-	822
MSTRG.18410.1	anti-sense-lncRNA	Cp4.1LG09	+	328
MSTRG.29809.1	anti-sense-lncRNA	Cp4.1LG19	-	740
MSTRG.11692.1	lincRNA	Cp4.1LG05	-	280
MSTRG.4905.1	lincRNA	Cp4.1LG01	+	450
MSTRG.28028.1	lincRNA	Cp4.1LG18	-	565
MSTRG.18379.9	sense-lncRNA	Cp4.1LG09	+	339
MSTRG.1537.2	lincRNA	Cp4.1LG00	-	812
MSTRG.13871.17	lincRNA	Cp4.1LG06	-	1513
MSTRG.9897.1	lincRNA	Cp4.1LG04	-	626
MSTRG.20378.1	anti-sense-lncRNA	Cp4.1LG11	+	266
MSTRG.10461.5	intronic_lncRNA	Cp4.1LG04	-	1264
MSTRG.378.2	lincRNA	Cp4.1LG00	-	311
MSTRG.20870.6	intronic_lncRNA	Cp4.1LG11	+	571
MSTRG.698.3	lincRNA	Cp4.1LG00	-	1817
MSTRG.9977.2	lincRNA	Cp4.1LG04	+	1164
MSTRG.24545.2	intronic_lncRNA	Cp4.1LG14	-	567
MSTRG.26108.12	intronic_lncRNA	Cp4.1LG16	-	483
MSTRG.14905.1	intronic_lncRNA	Cp4.1LG07	+	260
MSTRG.28774.1	intronic_lncRNA	Cp4.1LG18	-	205
MSTRG.20406.1	intronic_lncRNA	Cp4.1LG11	+	261
MSTRG.23844.3	sense-lncRNA	Cp4.1LG14	+	555
MSTRG.570.2	sense-lncRNA	Cp4.1LG00	-	209
MSTRG.14931.1	lincRNA	Cp4.1LG07	-	230
MSTRG.20878.1	lincRNA	Cp4.1LG11	-	541
MSTRG.5755.1	anti-sense-lncRNA	Cp4.1LG01	-	248
MSTRG.32.1	lincRNA	Cp4.1LG00	+	891
MSTRG.18995.2	anti-sense-lncRNA	Cp4.1LG10	+	454
MSTRG.17587.2	lincRNA	Cp4.1LG09	-	226
MSTRG.10461.4	intronic_lncRNA	Cp4.1LG04	-	1492
MSTRG.24236.1	lincRNA	Cp4.1LG14	+	275
MSTRG.3816.1	intronic_lncRNA	Cp4.1LG01	-	214
MSTRG.25870.2	lincRNA	Cp4.1LG16	-	611
MSTRG.350.1	lincRNA	Cp4.1LG00	-	238
MSTRG.15623.3	sense-lncRNA	Cp4.1LG07	-	592
MSTRG.23688.2	lincRNA	Cp4.1LG14	-	756
MSTRG.21292.10	sense-lncRNA	Cp4.1LG12	-	1696
MSTRG.9977.5	anti-sense-lncRNA	Cp4.1LG04	+	863
MSTRG.3690.1	sense-lncRNA	Cp4.1LG01	-	321
MSTRG.29602.1	anti-sense-lncRNA	Cp4.1LG19	+	318
MSTRG.12726.1	lincRNA	Cp4.1LG05	-	345
MSTRG.28098.4	anti-sense-lncRNA	Cp4.1LG18	+	963
MSTRG.12016.3	anti-sense-lncRNA	Cp4.1LG05	+	1309
MSTRG.5857.1	anti-sense-lncRNA	Cp4.1LG01	+	320
MSTRG.2156.1	lincRNA	Cp4.1LG00	-	300
MSTRG.22086.7	lincRNA	Cp4.1LG12	+	1202
MSTRG.14397.1	lincRNA	Cp4.1LG06	-	470
MSTRG.17891.1	lincRNA	Cp4.1LG09	-	250
MSTRG.20454.1	intronic_lncRNA	Cp4.1LG11	+	391
MSTRG.1772.2	lincRNA	Cp4.1LG00	-	528
MSTRG.4529.1	lincRNA	Cp4.1LG01	-	205
MSTRG.4638.4	lincRNA	Cp4.1LG01	+	338
MSTRG.27083.6	lincRNA	Cp4.1LG17	+	1685
MSTRG.4928.1	lincRNA	Cp4.1LG01	-	361
MSTRG.29524.3	anti-sense-lncRNA	Cp4.1LG19	+	317
MSTRG.20926.4	intronic_lncRNA	Cp4.1LG11	-	270
MSTRG.22439.3	lincRNA	Cp4.1LG13	+	1169
MSTRG.7275.1	intronic_lncRNA	Cp4.1LG02	-	293
MSTRG.25474.3	lincRNA	Cp4.1LG15	-	562
MSTRG.28238.1	anti-sense-lncRNA	Cp4.1LG18	+	385
MSTRG.1532.1	lincRNA	Cp4.1LG00	-	302
MSTRG.19597.3	anti-sense-lncRNA	Cp4.1LG10	+	349
MSTRG.19930.5	sense-lncRNA	Cp4.1LG11	-	990
MSTRG.14554.2	lincRNA	Cp4.1LG07	+	386
MSTRG.11287.2	lincRNA	Cp4.1LG04	-	1783
MSTRG.1352.1	lincRNA	Cp4.1LG00	-	526
MSTRG.1389.3	lincRNA	Cp4.1LG00	-	2687
MSTRG.17817.4	sense-lncRNA	Cp4.1LG09	-	253
MSTRG.7614.3	intronic_lncRNA	Cp4.1LG02	-	209
MSTRG.28135.3	lincRNA	Cp4.1LG18	-	503
MSTRG.1906.1	intronic_lncRNA	Cp4.1LG00	-	306
MSTRG.4300.7	anti-sense-lncRNA	Cp4.1LG01	-	437
MSTRG.24411.2	anti-sense-lncRNA	Cp4.1LG14	+	318
MSTRG.21495.1	lincRNA	Cp4.1LG12	+	364
MSTRG.25849.1	anti-sense-lncRNA	Cp4.1LG16	-	260
MSTRG.7561.1	intronic_lncRNA	Cp4.1LG02	-	413
MSTRG.15613.1	intronic_lncRNA	Cp4.1LG07	-	242
MSTRG.19185.1	anti-sense-lncRNA	Cp4.1LG10	+	303
MSTRG.16731.1	lincRNA	Cp4.1LG08	+	373
MSTRG.22462.1	lincRNA	Cp4.1LG13	+	216
MSTRG.26590.10	intronic_lncRNA	Cp4.1LG16	-	384
MSTRG.11668.1	lincRNA	Cp4.1LG05	-	211
MSTRG.8682.1	lincRNA	Cp4.1LG03	-	286
MSTRG.9905.1	lincRNA	Cp4.1LG04	+	223
MSTRG.25870.4	lincRNA	Cp4.1LG16	-	627
MSTRG.13243.1	anti-sense-lncRNA	Cp4.1LG06	-	408
MSTRG.16055.1	lincRNA	Cp4.1LG08	-	348
MSTRG.12926.1	lincRNA	Cp4.1LG05	-	299
MSTRG.20157.1	lincRNA	Cp4.1LG11	+	416
MSTRG.3643.3	lincRNA	Cp4.1LG01	-	769
MSTRG.16382.2	lincRNA	Cp4.1LG08	-	443
MSTRG.5408.1	intronic_lncRNA	Cp4.1LG01	+	348
MSTRG.22974.3	sense-lncRNA	Cp4.1LG13	-	318
MSTRG.18234.2	lincRNA	Cp4.1LG09	-	659
MSTRG.20789.1	lincRNA	Cp4.1LG11	-	618
MSTRG.20960.1	lincRNA	Cp4.1LG11	-	303
MSTRG.12590.1	lincRNA	Cp4.1LG05	+	346
MSTRG.20804.1	intronic_lncRNA	Cp4.1LG11	+	329
MSTRG.3311.2	anti-sense-lncRNA	Cp4.1LG01	+	646
MSTRG.9676.1	anti-sense-lncRNA	Cp4.1LG03	-	217
MSTRG.2146.1	lincRNA	Cp4.1LG00	+	515
MSTRG.25096.1	intronic_lncRNA	Cp4.1LG15	+	509
MSTRG.13789.1	lincRNA	Cp4.1LG06	+	364
MSTRG.25671.1	intronic_lncRNA	Cp4.1LG15	+	249
MSTRG.23688.3	lincRNA	Cp4.1LG14	-	747
MSTRG.11737.10	sense-lncRNA	Cp4.1LG05	+	1059
MSTRG.5742.1	lincRNA	Cp4.1LG01	-	774
MSTRG.15333.2	anti-sense-lncRNA	Cp4.1LG07	+	313
MSTRG.26741.21	lincRNA	Cp4.1LG17	+	1569
MSTRG.24331.1	lincRNA	Cp4.1LG14	+	303
MSTRG.25789.7	sense-lncRNA	Cp4.1LG16	+	224
MSTRG.7288.1	lincRNA	Cp4.1LG02	+	288
MSTRG.941.3	intronic_lncRNA	Cp4.1LG00	-	1648
MSTRG.4065.1	anti-sense-lncRNA	Cp4.1LG01	+	320
MSTRG.1214.1	lincRNA	Cp4.1LG00	-	447
MSTRG.998.3	lincRNA	Cp4.1LG00	-	1079
MSTRG.5817.5	lincRNA	Cp4.1LG01	+	662
MSTRG.5025.9	lincRNA	Cp4.1LG01	-	1424
MSTRG.3643.2	lincRNA	Cp4.1LG01	-	751
MSTRG.14736.1	anti-sense-lncRNA	Cp4.1LG07	-	290
MSTRG.19930.1	sense-lncRNA	Cp4.1LG11	-	1240
MSTRG.4793.1	intronic_lncRNA	Cp4.1LG01	-	297
MSTRG.8418.1	anti-sense-lncRNA	Cp4.1LG03	-	234
MSTRG.12576.3	sense-lncRNA	Cp4.1LG05	+	296
MSTRG.15881.2	intronic_lncRNA	Cp4.1LG08	-	249
MSTRG.660.1	lincRNA	Cp4.1LG00	+	605
MSTRG.3311.1	anti-sense-lncRNA	Cp4.1LG01	+	476
MSTRG.11323.3	anti-sense-lncRNA	Cp4.1LG04	-	410
MSTRG.11965.1	lincRNA	Cp4.1LG05	-	482
MSTRG.14708.1	lincRNA	Cp4.1LG07	-	285
MSTRG.12186.1	intronic_lncRNA	Cp4.1LG05	+	395
MSTRG.18116.2	sense-lncRNA	Cp4.1LG09	+	314
MSTRG.13553.10	anti-sense-lncRNA	Cp4.1LG06	-	710
MSTRG.2627.1	lincRNA	Cp4.1LG00	-	236
MSTRG.22439.2	lincRNA	Cp4.1LG13	+	1142
MSTRG.11948.1	lincRNA	Cp4.1LG05	-	280
MSTRG.20408.1	lincRNA	Cp4.1LG11	-	396
MSTRG.1931.2	lincRNA	Cp4.1LG00	+	557
MSTRG.31139.1	intronic_lncRNA	Cp4.1LG20	+	361
MSTRG.16920.1	anti-sense-lncRNA	Cp4.1LG08	-	228
MSTRG.25039.1	anti-sense-lncRNA	Cp4.1LG15	+	601
MSTRG.7614.4	intronic_lncRNA	Cp4.1LG02	-	461
MSTRG.11564.1	lincRNA	Cp4.1LG05	-	600
MSTRG.15020.3	lincRNA	Cp4.1LG07	+	343
MSTRG.16555.1	intronic_lncRNA	Cp4.1LG08	+	309
MSTRG.13010.3	intronic_lncRNA	Cp4.1LG05	+	870
MSTRG.22086.4	lincRNA	Cp4.1LG12	+	1278
MSTRG.1589.1	lincRNA	Cp4.1LG00	-	210
MSTRG.5817.2	lincRNA	Cp4.1LG01	+	629
MSTRG.10763.1	intronic_lncRNA	Cp4.1LG04	+	232
MSTRG.13272.1	lincRNA	Cp4.1LG06	-	298
MSTRG.27229.1	lincRNA	Cp4.1LG17	+	277
MSTRG.26527.2	sense-lncRNA	Cp4.1LG16	-	611
MSTRG.2483.1	lincRNA	Cp4.1LG00	+	363
MSTRG.17630.6	sense-lncRNA	Cp4.1LG09	-	388
MSTRG.25870.6	lincRNA	Cp4.1LG16	-	598
MSTRG.25475.41	lincRNA	Cp4.1LG15	-	1619
MSTRG.446.1	lincRNA	Cp4.1LG00	-	591
MSTRG.25808.2	lincRNA	Cp4.1LG16	-	328
MSTRG.29326.1	lincRNA	Cp4.1LG19	-	238
MSTRG.18338.1	intronic_lncRNA	Cp4.1LG09	+	206
MSTRG.24870.1	intronic_lncRNA	Cp4.1LG15	-	216
MSTRG.11180.1	anti-sense-lncRNA	Cp4.1LG04	-	371
MSTRG.16084.3	sense-lncRNA	Cp4.1LG08	+	494
MSTRG.29997.3	lincRNA	Cp4.1LG19	+	995
MSTRG.5065.5	sense-lncRNA	Cp4.1LG01	-	540
MSTRG.27938.2	lincRNA	Cp4.1LG18	+	299
MSTRG.20474.1	lincRNA	Cp4.1LG11	-	388
MSTRG.3472.1	lincRNA	Cp4.1LG01	+	278
MSTRG.7894.1	lincRNA	Cp4.1LG03	-	314
MSTRG.21384.10	sense-lncRNA	Cp4.1LG12	-	347
MSTRG.23595.1	lincRNA	Cp4.1LG14	+	240
MSTRG.2360.4	lincRNA	Cp4.1LG00	+	336
MSTRG.5931.4	intronic_lncRNA	Cp4.1LG02	-	280
MSTRG.20745.1	lincRNA	Cp4.1LG11	-	304
MSTRG.23106.6	intronic_lncRNA	Cp4.1LG13	+	540
MSTRG.13553.6	anti-sense-lncRNA	Cp4.1LG06	-	1409
MSTRG.13271.2	lincRNA	Cp4.1LG06	-	1197
MSTRG.27083.3	lincRNA	Cp4.1LG17	+	1724
MSTRG.21216.1	anti-sense-lncRNA	Cp4.1LG12	-	351
MSTRG.5864.1	intronic_lncRNA	Cp4.1LG01	+	336
MSTRG.4187.1	lincRNA	Cp4.1LG01	-	208
MSTRG.21728.8	intronic_lncRNA	Cp4.1LG12	-	474
MSTRG.2031.2	lincRNA	Cp4.1LG00	+	540
MSTRG.1052.2	lincRNA	Cp4.1LG00	-	964
MSTRG.28135.2	lincRNA	Cp4.1LG18	-	391
MSTRG.27823.1	lincRNA	Cp4.1LG17	+	234
MSTRG.5435.3	lincRNA	Cp4.1LG01	+	572
MSTRG.1009.1	lincRNA	Cp4.1LG00	-	209
MSTRG.26408.1	anti-sense-lncRNA	Cp4.1LG16	+	228
MSTRG.22086.6	lincRNA	Cp4.1LG12	+	2095
MSTRG.26741.18	sense-lncRNA	Cp4.1LG17	+	2363
MSTRG.9539.1	lincRNA	Cp4.1LG03	+	227
MSTRG.23441.5	sense-lncRNA	Cp4.1LG13	+	383
MSTRG.21598.1	anti-sense-lncRNA	Cp4.1LG12	+	217
MSTRG.15851.6	anti-sense-lncRNA	Cp4.1LG08	+	287
MSTRG.17821.8	anti-sense-lncRNA	Cp4.1LG09	+	860
MSTRG.21789.1	anti-sense-lncRNA	Cp4.1LG12	-	264
MSTRG.17438.4	lincRNA	Cp4.1LG09	+	1322
MSTRG.22086.8	lincRNA	Cp4.1LG12	+	979
MSTRG.2360.6	lincRNA	Cp4.1LG00	+	230
MSTRG.4121.2	anti-sense-lncRNA	Cp4.1LG01	+	415
MSTRG.27634.1	lincRNA	Cp4.1LG17	-	226
MSTRG.15987.3	sense-lncRNA	Cp4.1LG08	-	355
MSTRG.21010.9	anti-sense-lncRNA	Cp4.1LG11	+	1049
MSTRG.10806.1	anti-sense-lncRNA	Cp4.1LG04	+	352
MSTRG.1369.1	lincRNA	Cp4.1LG00	+	618
MSTRG.15333.1	intronic_lncRNA	Cp4.1LG07	+	387
MSTRG.21854.2	intronic_lncRNA	Cp4.1LG12	-	347
MSTRG.17939.1	lincRNA	Cp4.1LG09	+	378
MSTRG.20390.2	anti-sense-lncRNA	Cp4.1LG11	-	247
MSTRG.9442.1	intronic_lncRNA	Cp4.1LG03	-	306
MSTRG.59.1	intronic_lncRNA	Cp4.1LG00	+	229
MSTRG.10607.2	lincRNA	Cp4.1LG04	-	298
MSTRG.7737.6	anti-sense-lncRNA	Cp4.1LG02	+	599
MSTRG.22907.1	lincRNA	Cp4.1LG13	+	368
MSTRG.19082.3	anti-sense-lncRNA	Cp4.1LG10	-	352
MSTRG.14276.1	lincRNA	Cp4.1LG06	-	237
MSTRG.14191.1	lincRNA	Cp4.1LG06	+	287
MSTRG.12937.1	anti-sense-lncRNA	Cp4.1LG05	-	313
MSTRG.29075.1	lincRNA	Cp4.1LG19	-	279
MSTRG.4704.1	lincRNA	Cp4.1LG01	-	517
MSTRG.15991.2	anti-sense-lncRNA	Cp4.1LG08	-	572
MSTRG.2018.1	lincRNA	Cp4.1LG00	+	1084
MSTRG.21019.1	lincRNA	Cp4.1LG11	-	266
MSTRG.15926.9	intronic_lncRNA	Cp4.1LG08	+	643
MSTRG.20305.1	lincRNA	Cp4.1LG11	-	240
MSTRG.8013.2	anti-sense-lncRNA	Cp4.1LG03	-	219
MSTRG.29645.1	anti-sense-lncRNA	Cp4.1LG19	-	250
MSTRG.9541.2	lincRNA	Cp4.1LG03	+	1648
MSTRG.30400.1	lincRNA	Cp4.1LG20	-	285
MSTRG.8280.7	intronic_lncRNA	Cp4.1LG03	-	569
MSTRG.21733.1	lincRNA	Cp4.1LG12	-	320
MSTRG.27083.2	lincRNA	Cp4.1LG17	+	1853
MSTRG.6496.1	anti-sense-lncRNA	Cp4.1LG02	-	499
MSTRG.19207.1	lincRNA	Cp4.1LG10	+	337
MSTRG.12801.7	intronic_lncRNA	Cp4.1LG05	-	232
MSTRG.10924.3	sense-lncRNA	Cp4.1LG04	-	1028
MSTRG.14652.1	anti-sense-lncRNA	Cp4.1LG07	+	274
MSTRG.26794.1	intronic_lncRNA	Cp4.1LG17	-	342
MSTRG.30724.1	lincRNA	Cp4.1LG20	+	534
MSTRG.20874.2	lincRNA	Cp4.1LG11	+	686
MSTRG.17528.3	sense-lncRNA	Cp4.1LG09	-	288
MSTRG.7291.3	sense-lncRNA	Cp4.1LG02	-	408
MSTRG.29334.1	intronic_lncRNA	Cp4.1LG19	+	251
MSTRG.8053.1	anti-sense-lncRNA	Cp4.1LG03	-	422
MSTRG.17971.2	intronic_lncRNA	Cp4.1LG09	+	529
MSTRG.25780.1	anti-sense-lncRNA	Cp4.1LG16	+	340
MSTRG.15284.1	lincRNA	Cp4.1LG07	+	270
MSTRG.22327.1	intronic_lncRNA	Cp4.1LG13	-	261
MSTRG.27209.1	anti-sense-lncRNA	Cp4.1LG17	+	273
MSTRG.16019.5	intronic_lncRNA	Cp4.1LG08	-	540
MSTRG.18406.4	lincRNA	Cp4.1LG09	+	430
MSTRG.1692.1	intronic_lncRNA	Cp4.1LG00	+	360
MSTRG.21624.1	lincRNA	Cp4.1LG12	+	272
MSTRG.24321.1	lincRNA	Cp4.1LG14	+	273
MSTRG.29846.1	lincRNA	Cp4.1LG19	-	395
MSTRG.2276.2	lincRNA	Cp4.1LG00	+	407
MSTRG.3916.1	lincRNA	Cp4.1LG01	-	321
MSTRG.12288.4	intronic_lncRNA	Cp4.1LG05	+	405
MSTRG.6526.1	intronic_lncRNA	Cp4.1LG02	-	284
MSTRG.11813.1	lincRNA	Cp4.1LG05	+	788
MSTRG.1389.4	lincRNA	Cp4.1LG00	-	1825
MSTRG.26741.24	lincRNA	Cp4.1LG17	+	962
MSTRG.1259.1	lincRNA	Cp4.1LG00	-	327
MSTRG.23482.1	lincRNA	Cp4.1LG13	-	242
MSTRG.13896.2	lincRNA	Cp4.1LG06	-	271
MSTRG.20386.4	lincRNA	Cp4.1LG11	-	3236
MSTRG.19620.16	sense-lncRNA	Cp4.1LG10	+	270
MSTRG.16684.1	anti-sense-lncRNA	Cp4.1LG08	-	276
MSTRG.21741.2	lincRNA	Cp4.1LG12	+	927
MSTRG.19485.9	sense-lncRNA	Cp4.1LG10	+	602
MSTRG.25017.1	lincRNA	Cp4.1LG15	-	240
MSTRG.23508.3	anti-sense-lncRNA	Cp4.1LG13	+	484
MSTRG.5852.1	anti-sense-lncRNA	Cp4.1LG01	+	211
MSTRG.20332.2	sense-lncRNA	Cp4.1LG11	-	297
MSTRG.24013.1	lincRNA	Cp4.1LG14	-	219
MSTRG.7145.2	lincRNA	Cp4.1LG02	-	328
MSTRG.8947.4	anti-sense-lncRNA	Cp4.1LG03	-	884
MSTRG.22086.5	lincRNA	Cp4.1LG12	+	1887
MSTRG.382.4	lincRNA	Cp4.1LG00	-	542
MSTRG.14554.3	lincRNA	Cp4.1LG07	+	290
MSTRG.12435.1	lincRNA	Cp4.1LG05	+	211
MSTRG.19082.2	anti-sense-lncRNA	Cp4.1LG10	-	651
MSTRG.4952.2	lincRNA	Cp4.1LG01	-	227
MSTRG.4952.1	lincRNA	Cp4.1LG01	-	227
MSTRG.15954.1	lincRNA	Cp4.1LG08	-	220
MSTRG.15879.1	intronic_lncRNA	Cp4.1LG08	+	244
MSTRG.26717.1	lincRNA	Cp4.1LG17	+	234
MSTRG.13750.3	sense-lncRNA	Cp4.1LG06	+	300
MSTRG.11784.2	sense-lncRNA	Cp4.1LG05	-	733
MSTRG.28994.1	lincRNA	Cp4.1LG19	-	280
MSTRG.30795.1	lincRNA	Cp4.1LG20	+	363
MSTRG.27552.1	lincRNA	Cp4.1LG17	+	364
MSTRG.27906.1	anti-sense-lncRNA	Cp4.1LG17	+	244
MSTRG.17945.1	lincRNA	Cp4.1LG09	-	355
MSTRG.27546.1	lincRNA	Cp4.1LG17	-	425
MSTRG.27434.1	anti-sense-lncRNA	Cp4.1LG17	-	480
MSTRG.11181.1	anti-sense-lncRNA	Cp4.1LG04	-	332
MSTRG.7737.2	anti-sense-lncRNA	Cp4.1LG02	+	758
MSTRG.21313.1	lincRNA	Cp4.1LG12	+	457
MSTRG.6154.2	sense-lncRNA	Cp4.1LG02	-	512
MSTRG.28110.3	anti-sense-lncRNA	Cp4.1LG18	+	1347
MSTRG.26885.1	lincRNA	Cp4.1LG17	-	258
MSTRG.5025.2	lincRNA	Cp4.1LG01	-	1850
MSTRG.5025.4	lincRNA	Cp4.1LG01	-	2182
MSTRG.16638.12	intronic_lncRNA	Cp4.1LG08	+	893
MSTRG.5025.7	lincRNA	Cp4.1LG01	-	1137
MSTRG.11343.1	anti-sense-lncRNA	Cp4.1LG04	+	376
MSTRG.7618.3	lincRNA	Cp4.1LG02	+	604
MSTRG.27075.1	lincRNA	Cp4.1LG17	+	308
MSTRG.13033.6	anti-sense-lncRNA	Cp4.1LG05	+	1441
MSTRG.9209.1	lincRNA	Cp4.1LG03	-	320
MSTRG.8249.7	sense-lncRNA	Cp4.1LG03	+	252
MSTRG.11688.10	lincRNA	Cp4.1LG05	+	1129
MSTRG.13670.11	sense-lncRNA	Cp4.1LG06	-	404
MSTRG.13879.2	anti-sense-lncRNA	Cp4.1LG06	-	386
MSTRG.11132.1	anti-sense-lncRNA	Cp4.1LG04	-	222
MSTRG.21067.1	lincRNA	Cp4.1LG12	+	295
MSTRG.23833.2	lincRNA	Cp4.1LG14	-	736
MSTRG.17821.1	anti-sense-lncRNA	Cp4.1LG09	+	919
MSTRG.22441.1	intronic_lncRNA	Cp4.1LG13	-	272
MSTRG.17279.1	intronic_lncRNA	Cp4.1LG09	+	333
MSTRG.12318.1	lincRNA	Cp4.1LG05	+	266
MSTRG.22806.9	sense-lncRNA	Cp4.1LG13	+	539
MSTRG.13525.1	lincRNA	Cp4.1LG06	-	256
MSTRG.27760.3	intronic_lncRNA	Cp4.1LG17	+	441
MSTRG.30383.4	lincRNA	Cp4.1LG20	-	539
[truncated: 365 more rows]
