# Supplementary material for: Genome-Wide Identification of Powdery Mildew Responsive Long Non-Coding RNAs in Cucurbita pepo
Source: Front Genet. 2022 Jul 1;13:933022. doi: 10.3389/fgene.2022.933022 (PMC9283782; doi:10.3389/fgene.2022.933022)
Supplement: Supplementary file 3 [file Table9.XLSX]

## Sheet: Sheet1
Table S9 Targets of miRNAs verified by degradome sequencing
miRNA_Acc.	Target_Acc.	DEL	TStart	TStop	TSlice	MFEratio	AllenScore	Degradome Raw Reads	Degradome Norm Reads	Degradome Category	Degradome P value
cpe-miR172	MSTRG.23109.2	YES	81	101	92	1	2	9	70866.1	2	0.0031845
cpe-miR396a	MSTRG.11047.1	YES	190	209	200	0.827692	2.5	6	47244.1	2	0.00794225
cpe-miR396a	MSTRG.11047.3	YES	190	209	200	0.827692	2.5	3	23622	2	0.00635887
cpe-miR5067	MSTRG.17854.1	NO	277	300	291	0.684211	4.5	2	15748	3	0.0201071
cpe-miR5067	MSTRG.17854.1	NO	557	580	571	0.815789	4	1	7874.02	4	0.0341239
cpe-miR5067	MSTRG.17854.1	NO	891	914	905	0.779904	3.5	1	7874.02	4	0.0389028
cpe-miR396b	MSTRG.28493.1	NO	195	215	206	0.805389	3.5	44	346457	0	0.00151434
cpe-miR396b	MSTRG.28493.2	NO	195	215	206	0.805389	3.5	48	377953	0	0.00121166
