# Supplementary material for: Genome-Wide Identification of Powdery Mildew Responsive Long Non-Coding RNAs in Cucurbita pepo
Source: Front Genet. 2022 Jul 1;13:933022. doi: 10.3389/fgene.2022.933022 (PMC9283782; doi:10.3389/fgene.2022.933022)
Supplement: Supplementary file 4 [file Table6.XLSX]

## Sheet: Sheet1
Table S6 Cis-elements in the promoters of the PM-responsive lncRNAs
lncRNA ID	Cis-element Name	Cis-element Sequence	Cis-element Length	Type
MSTRG.226	CGTCA-motif	CGTCA	5	MeJA-responsive
MSTRG.226	CGTCA-motif	CGTCA	5	MeJA-responsive
MSTRG.226	TGACG-motif	TGACG	5	MeJA-responsive
MSTRG.226	TGACG-motif	TGACG	5	MeJA-responsive
MSTRG.226	ABRE	TACGGTC	7	abscisic acid responsive
MSTRG.433	ABRE	ACGTG	5	abscisic acid responsive
MSTRG.433	TGACG-motif	TGACG	5	MeJA-responsive
MSTRG.433	TGACG-motif	TGACG	5	MeJA-responsive
MSTRG.433	CGTCA-motif	CGTCA	5	MeJA-responsive
MSTRG.433	CGTCA-motif	CGTCA	5	MeJA-responsive
MSTRG.433	P-box	CCTTTTG	7	gibberellin-responsive
MSTRG.479	ABRE	GACACGTGGC	9	abscisic acid responsive
MSTRG.479	TGACG-motif	TGACG	5	MeJA-responsive
MSTRG.479	TGACG-motif	TGACG	5	MeJA-responsive
MSTRG.479	CGTCA-motif	CGTCA	5	MeJA-responsive
MSTRG.479	CGTCA-motif	CGTCA	5	MeJA-responsive
MSTRG.481	CGTCA-motif	CGTCA	5	MeJA-responsive
MSTRG.481	TGACG-motif	TGACG	5	MeJA-responsive
MSTRG.58	TCA-element	TCAGAAGAGG	9	salicylic acid responsive
MSTRG.608	CGTCA-motif	CGTCA	5	MeJA-responsive
MSTRG.608	TGACG-motif	TGACG	5	MeJA-responsive
MSTRG.616	P-box	CCTTTTG	7	gibberellin-responsive
MSTRG.616	P-box	CCTTTTG	7	gibberellin-responsive
MSTRG.616	TATC-box	TATCCCA	7	gibberellin-responsive
MSTRG.616	TATC-box	TATCCCA	7	gibberellin-responsive
MSTRG.643	TATC-box	TATCCCA	7	gibberellin-responsive
MSTRG.654	SARE	TTCGACCATCTT	11	salicylic acid responsive
MSTRG.654	ABRE	ACGTG	5	abscisic acid responsive
MSTRG.654	ABRE	CACGTG	6	abscisic acid responsive
MSTRG.654	ABRE	ACGTG	5	abscisic acid responsive
MSTRG.654	ABRE	ACGTG	5	abscisic acid responsive
MSTRG.654	TGACG-motif	TGACG	5	MeJA-responsive
MSTRG.654	TGACG-motif	TGACG	5	MeJA-responsive
MSTRG.654	TC-rich repeats	ATTCTCTAAC	9	defense and stress responsive
MSTRG.654	CGTCA-motif	CGTCA	5	MeJA-responsive
MSTRG.654	CGTCA-motif	CGTCA	5	MeJA-responsive
MSTRG.686	TGA-box	TGACGTAA	8	auxin-responsive
MSTRG.686	ABRE	ACGTG	5	abscisic acid responsive
MSTRG.686	TGACG-motif	TGACG	5	MeJA-responsive
MSTRG.686	CGTCA-motif	CGTCA	5	MeJA-responsive
MSTRG.688	TGACG-motif	TGACG	5	MeJA-responsive
MSTRG.688	TCA-element	CCATCTTTTT	9	salicylic acid responsive
MSTRG.688	CGTCA-motif	CGTCA	5	MeJA-responsive
MSTRG.773	ABRE	ACGTG	5	abscisic acid responsive
MSTRG.792	ABRE	ACGTG	5	abscisic acid responsive
MSTRG.792	P-box	CCTTTTG	7	gibberellin-responsive
MSTRG.792	CGTCA-motif	CGTCA	5	MeJA-responsive
MSTRG.792	TGACG-motif	TGACG	5	MeJA-responsive
MSTRG.821	ABRE	ACGTG	5	abscisic acid responsive
MSTRG.821	TGA-element	AACGAC	6	auxin-responsive
MSTRG.851	CGTCA-motif	CGTCA	5	MeJA-responsive
MSTRG.851	TC-rich repeats	GTTTTCTTAC	9	defense and stress responsive
MSTRG.851	TGACG-motif	TGACG	5	MeJA-responsive
MSTRG.938	TATC-box	TATCCCA	7	gibberellin-responsive
MSTRG.938	CGTCA-motif	CGTCA	5	MeJA-responsive
MSTRG.938	TC-rich repeats	GTTTTCTTAC	9	defense and stress responsive
MSTRG.938	TGACG-motif	TGACG	5	MeJA-responsive
MSTRG.944	TCA-element	CCATCTTTTT	9	salicylic acid responsive
MSTRG.967	TC-rich repeats	ATTCTCTAAC	9	defense and stress responsive
MSTRG.967	TGACG-motif	TGACG	5	MeJA-responsive
MSTRG.967	CGTCA-motif	CGTCA	5	MeJA-responsive
MSTRG.967	AuxRR-core	GGTCCAT	7	auxin-responsive
MSTRG.1028	P-box	CCTTTTG	7	gibberellin-responsive
MSTRG.1111	TC-rich repeats	ATTCTCTAAC	9	defense and stress responsive
MSTRG.1111	TC-rich repeats	GTTTTCTTAC	9	defense and stress responsive
MSTRG.1111	TC-rich repeats	GTTTTCTTAC	9	defense and stress responsive
MSTRG.1111	TC-rich repeats	GTTTTCTTAC	9	defense and stress responsive
MSTRG.1111	TGACG-motif	TGACG	5	MeJA-responsive
MSTRG.1111	CGTCA-motif	CGTCA	5	MeJA-responsive
MSTRG.1111	TGA-box	TGACGTAA	8	auxin-responsive
MSTRG.1111	TGA-element	AACGAC	6	auxin-responsive
MSTRG.1111	TGA-element	AACGAC	6	auxin-responsive
MSTRG.22	ABRE	ACGTG	5	abscisic acid responsive
MSTRG.22	TCA-element	CCATCTTTTT	9	salicylic acid responsive
MSTRG.22	TCA-element	CCATCTTTTT	9	salicylic acid responsive
MSTRG.22	P-box	CCTTTTG	7	gibberellin-responsive
MSTRG.22	P-box	CCTTTTG	7	gibberellin-responsive
MSTRG.1322	ABRE	ACGTG	5	abscisic acid responsive
MSTRG.1322	TCA-element	CCATCTTTTT	9	salicylic acid responsive
MSTRG.1322	TC-rich repeats	GTTTTCTTAC	9	defense and stress responsive
MSTRG.144	TCA-element	CCATCTTTTT	9	salicylic acid responsive
MSTRG.144	P-box	CCTTTTG	7	gibberellin-responsive
MSTRG.144	CGTCA-motif	CGTCA	5	MeJA-responsive
MSTRG.144	CGTCA-motif	CGTCA	5	MeJA-responsive
MSTRG.144	TGACG-motif	TGACG	5	MeJA-responsive
MSTRG.144	TGACG-motif	TGACG	5	MeJA-responsive
MSTRG.1770	TGACG-motif	TGACG	5	MeJA-responsive
MSTRG.1770	TC-rich repeats	ATTCTCTAAC	9	defense and stress responsive
MSTRG.1770	P-box	CCTTTTG	7	gibberellin-responsive
MSTRG.1770	CGTCA-motif	CGTCA	5	MeJA-responsive
MSTRG.1770	AuxRR-core	GGTCCAT	7	auxin-responsive
MSTRG.1796	TGA-element	AACGAC	6	auxin-responsive
MSTRG.1796	ABRE	CGCACGTGTC	9	abscisic acid responsive
MSTRG.1796	ABRE	ACGTG	5	abscisic acid responsive
MSTRG.2074	CGTCA-motif	CGTCA	5	MeJA-responsive
MSTRG.2074	CGTCA-motif	CGTCA	5	MeJA-responsive
MSTRG.2074	TGACG-motif	TGACG	5	MeJA-responsive
MSTRG.2074	TGACG-motif	TGACG	5	MeJA-responsive
MSTRG.2074	TGA-element	AACGAC	6	auxin-responsive
MSTRG.2101	CGTCA-motif	CGTCA	5	MeJA-responsive
MSTRG.2101	CGTCA-motif	CGTCA	5	MeJA-responsive
MSTRG.2101	TGACG-motif	TGACG	5	MeJA-responsive
MSTRG.2101	TGACG-motif	TGACG	5	MeJA-responsive
MSTRG.2101	ABRE	CGCACGTGTC	9	abscisic acid responsive
MSTRG.2101	ABRE	CACGTG	6	abscisic acid responsive
MSTRG.2101	ABRE	ACGTG	5	abscisic acid responsive
MSTRG.2101	ABRE	GACACGTGGC	9	abscisic acid responsive
MSTRG.2101	ABRE	CACGTG	6	abscisic acid responsive
MSTRG.2101	ABRE	ACGTG	5	abscisic acid responsive
MSTRG.2101	TCA-element	CCATCTTTTT	9	salicylic acid responsive
MSTRG.2197	CGTCA-motif	CGTCA	5	MeJA-responsive
MSTRG.2197	CGTCA-motif	CGTCA	5	MeJA-responsive
MSTRG.2197	CGTCA-motif	CGTCA	5	MeJA-responsive
MSTRG.2197	TGACG-motif	TGACG	5	MeJA-responsive
MSTRG.2197	TGACG-motif	TGACG	5	MeJA-responsive
MSTRG.2197	TGACG-motif	TGACG	5	MeJA-responsive
MSTRG.2197	ABRE	ACGTG	5	abscisic acid responsive
MSTRG.2197	ABRE	ACGTG	5	abscisic acid responsive
MSTRG.2197	ABRE	ACGTG	5	abscisic acid responsive
MSTRG.2197	TGA-element	AACGAC	6	auxin-responsive
MSTRG.2226	TCA-element	CCATCTTTTT	9	salicylic acid responsive
MSTRG.2227	ABRE	CACGTG	6	abscisic acid responsive
MSTRG.2227	ABRE	ACGTG	5	abscisic acid responsive
MSTRG.2227	ABRE	CACGTG	6	abscisic acid responsive
MSTRG.2227	ABRE	ACGTG	5	abscisic acid responsive
MSTRG.2227	ABRE	ACGTG	5	abscisic acid responsive
MSTRG.2227	ABRE	CACGTG	6	abscisic acid responsive
MSTRG.2227	ABRE	ACGTG	5	abscisic acid responsive
MSTRG.2360	CGTCA-motif	CGTCA	5	MeJA-responsive
MSTRG.2360	TC-rich repeats	ATTCTCTAAC	9	defense and stress responsive
MSTRG.2360	TGACG-motif	TGACG	5	MeJA-responsive
MSTRG.2360	ABRE	ACGTG	5	abscisic acid responsive
MSTRG.2360	ABRE	GACACGTGGC	9	abscisic acid responsive
MSTRG.2360	TCA-element	CCATCTTTTT	9	salicylic acid responsive
MSTRG.4	TGA-element	AACGAC	6	auxin-responsive
MSTRG.4	TGA-element	AACGAC	6	auxin-responsive
MSTRG.4	ABRE	ACGTG	5	abscisic acid responsive
MSTRG.4	P-box	CCTTTTG	7	gibberellin-responsive
MSTRG.5	CGTCA-motif	CGTCA	5	MeJA-responsive
MSTRG.5	TGACG-motif	TGACG	5	MeJA-responsive
MSTRG.5	TC-rich repeats	GTTTTCTTAC	9	defense and stress responsive
MSTRG.5	TGA-element	AACGAC	6	auxin-responsive
MSTRG.23799	ABRE	ACGTG	5	abscisic acid responsive
MSTRG.23799	ABRE	ACGTG	5	abscisic acid responsive
MSTRG.23799	TCA-element	TCAGAAGAGG	9	salicylic acid responsive
MSTRG.24989	CGTCA-motif	CGTCA	5	MeJA-responsive
MSTRG.24989	TGACG-motif	TGACG	5	MeJA-responsive
MSTRG.24989	ABRE	CACGTG	6	abscisic acid responsive
MSTRG.24989	ABRE	ACGTG	5	abscisic acid responsive
MSTRG.24989	ABRE	GACACGTGGC	9	abscisic acid responsive
MSTRG.24989	ABRE	ACGTG	5	abscisic acid responsive
MSTRG.24797	ABRE	AACCCGG	7	abscisic acid responsive
MSTRG.24797	TCA-element	CCATCTTTTT	9	salicylic acid responsive
MSTRG.24797	GARE-motif	TCTGTTG	7	gibberellin-responsive
MSTRG.24797	TGA-element	AACGAC	6	auxin-responsive
MSTRG.24797	P-box	CCTTTTG	7	gibberellin-responsive
MSTRG.24797	P-box	CCTTTTG	7	gibberellin-responsive
MSTRG.25475	CGTCA-motif	CGTCA	5	MeJA-responsive
MSTRG.25475	ABRE	ACGTG	5	abscisic acid responsive
MSTRG.25475	TGACG-motif	TGACG	5	MeJA-responsive
MSTRG.25475	TC-rich repeats	ATTCTCTAAC	9	defense and stress responsive
MSTRG.25916	TCA-element	TCAGAAGAGG	9	salicylic acid responsive
MSTRG.25916	ABRE	ACGTG	5	abscisic acid responsive
MSTRG.25916	TC-rich repeats	ATTCTCTAAC	9	defense and stress responsive
MSTRG.25922	TCA-element	CCATCTTTTT	9	salicylic acid responsive
MSTRG.25922	P-box	CCTTTTG	7	gibberellin-responsive
MSTRG.26421	ABRE	ACGTG	5	abscisic acid responsive
MSTRG.26421	TATC-box	TATCCCA	7	gibberellin-responsive
MSTRG.26590	TGA-element	AACGAC	6	auxin-responsive
MSTRG.26590	GARE-motif	TCTGTTG	7	gibberellin-responsive
MSTRG.26722	TGACG-motif	TGACG	5	MeJA-responsive
MSTRG.26722	TGACG-motif	TGACG	5	MeJA-responsive
MSTRG.26722	CGTCA-motif	CGTCA	5	MeJA-responsive
MSTRG.26722	CGTCA-motif	CGTCA	5	MeJA-responsive
MSTRG.26968	TGA-element	AACGAC	6	auxin-responsive
MSTRG.27083	CGTCA-motif	CGTCA	5	MeJA-responsive
MSTRG.27083	TGACG-motif	TGACG	5	MeJA-responsive
MSTRG.27083	TC-rich repeats	GTTTTCTTAC	9	defense and stress responsive
MSTRG.27083	P-box	CCTTTTG	7	gibberellin-responsive
MSTRG.27083	ABRE	ACGTG	5	abscisic acid responsive
MSTRG.27083	ABRE	ACGTG	5	abscisic acid responsive
MSTRG.27083	ABRE	ACGTG	5	abscisic acid responsive
MSTRG.27083	ABRE	TACGTGTC	8	abscisic acid responsive
MSTRG.27083	ABRE	ACGTG	5	abscisic acid responsive
MSTRG.27083	TCA-element	CCATCTTTTT	9	salicylic acid responsive
MSTRG.27083	TCA-element	TCAGAAGAGG	9	salicylic acid responsive
MSTRG.27378	TC-rich repeats	ATTCTCTAAC	9	defense and stress responsive
MSTRG.27378	TC-rich repeats	GTTTTCTTAC	9	defense and stress responsive
MSTRG.27378	TATC-box	TATCCCA	7	gibberellin-responsive
MSTRG.27378	TGA-element	AACGAC	6	auxin-responsive
MSTRG.27378	TCA-element	TCAGAAGAGG	9	salicylic acid responsive
MSTRG.27588	TCA-element	CCATCTTTTT	9	salicylic acid responsive
MSTRG.27589	ABRE	TACGGTC	7	abscisic acid responsive
MSTRG.27589	ABRE	CGTACGTGCA	9	abscisic acid responsive
MSTRG.27655	P-box	CCTTTTG	7	gibberellin-responsive
MSTRG.27655	CGTCA-motif	CGTCA	5	MeJA-responsive
MSTRG.27655	TGACG-motif	TGACG	5	MeJA-responsive
MSTRG.27883	TATC-box	TATCCCA	7	gibberellin-responsive
MSTRG.28006	CGTCA-motif	CGTCA	5	MeJA-responsive
MSTRG.28006	TGACG-motif	TGACG	5	MeJA-responsive
MSTRG.28006	ABRE	ACGTG	5	abscisic acid responsive
MSTRG.28022	ABRE	ACGTG	5	abscisic acid responsive
MSTRG.28022	ABRE	ACGTG	5	abscisic acid responsive
MSTRG.28022	ABRE	CGCACGTGTC	9	abscisic acid responsive
MSTRG.28022	ABRE	CACGTG	6	abscisic acid responsive
MSTRG.28022	ABRE	ACGTG	5	abscisic acid responsive
MSTRG.28022	TGACG-motif	TGACG	5	MeJA-responsive
MSTRG.28022	TGACG-motif	TGACG	5	MeJA-responsive
MSTRG.28022	CGTCA-motif	CGTCA	5	MeJA-responsive
MSTRG.28022	CGTCA-motif	CGTCA	5	MeJA-responsive
MSTRG.28024	ABRE	ACGTG	5	abscisic acid responsive
MSTRG.28024	ABRE	GACACGTGGC	9	abscisic acid responsive
MSTRG.28024	ABRE	ACGTG	5	abscisic acid responsive
MSTRG.28024	ABRE	ACGTG	5	abscisic acid responsive
MSTRG.28024	CGTCA-motif	CGTCA	5	MeJA-responsive
MSTRG.28024	TGACG-motif	TGACG	5	MeJA-responsive
MSTRG.28570	TGACG-motif	TGACG	5	MeJA-responsive
MSTRG.28570	TGACG-motif	TGACG	5	MeJA-responsive
MSTRG.28570	TGACG-motif	TGACG	5	MeJA-responsive
MSTRG.28570	AuxRR-core	GGTCCAT	7	auxin-responsive
MSTRG.28570	TCA-element	TCAGAAGAGG	9	salicylic acid responsive
MSTRG.28570	ABRE	ACGTG	5	abscisic acid responsive
MSTRG.28570	CGTCA-motif	CGTCA	5	MeJA-responsive
MSTRG.28570	CGTCA-motif	CGTCA	5	MeJA-responsive
MSTRG.28570	CGTCA-motif	CGTCA	5	MeJA-responsive
MSTRG.28915	CGTCA-motif	CGTCA	5	MeJA-responsive
MSTRG.28915	TC-rich repeats	GTTTTCTTAC	9	defense and stress responsive
MSTRG.28915	TGACG-motif	TGACG	5	MeJA-responsive
MSTRG.29105	ABRE	ACGTG	5	abscisic acid responsive
MSTRG.29105	TCA-element	CCATCTTTTT	9	salicylic acid responsive
MSTRG.29105	TC-rich repeats	ATTCTCTAAC	9	defense and stress responsive
MSTRG.29156	TGA-element	AACGAC	6	auxin-responsive
MSTRG.29156	TGA-element	AACGAC	6	auxin-responsive
MSTRG.29156	ABRE	ACGTG	5	abscisic acid responsive
MSTRG.29156	ABRE	ACGTG	5	abscisic acid responsive
MSTRG.29156	ABRE	GCAACGTGTC	9	abscisic acid responsive
MSTRG.29156	ABRE	ACGTG	5	abscisic acid responsive
MSTRG.29156	TCA-element	CCATCTTTTT	9	salicylic acid responsive
MSTRG.29156	TGACG-motif	TGACG	5	MeJA-responsive
MSTRG.29156	TGACG-motif	TGACG	5	MeJA-responsive
MSTRG.29156	TATC-box	TATCCCA	7	gibberellin-responsive
MSTRG.29156	CGTCA-motif	CGTCA	5	MeJA-responsive
MSTRG.29156	CGTCA-motif	CGTCA	5	MeJA-responsive
MSTRG.29000	TGA-element	AACGAC	6	auxin-responsive
MSTRG.29000	TGACG-motif	TGACG	5	MeJA-responsive
MSTRG.29000	CGTCA-motif	CGTCA	5	MeJA-responsive
MSTRG.29422	TCA-element	CCATCTTTTT	9	salicylic acid responsive
MSTRG.29422	CGTCA-motif	CGTCA	5	MeJA-responsive
MSTRG.29422	TGACG-motif	TGACG	5	MeJA-responsive
MSTRG.29422	TATC-box	TATCCCA	7	gibberellin-responsive
MSTRG.29656	ABRE	ACGTG	5	abscisic acid responsive
MSTRG.29656	ABRE	ACGTG	5	abscisic acid responsive
MSTRG.29656	ABRE	ACGTG	5	abscisic acid responsive
MSTRG.29656	TATC-box	TATCCCA	7	gibberellin-responsive
MSTRG.30158	ABRE	GACACGTGGC	9	abscisic acid responsive
MSTRG.30158	AuxRR-core	GGTCCAT	7	auxin-responsive
MSTRG.30158	P-box	CCTTTTG	7	gibberellin-responsive
MSTRG.30281	ABRE	ACGTG	5	abscisic acid responsive
MSTRG.30281	ABRE	ACGTG	5	abscisic acid responsive
MSTRG.30281	ABRE	ACGTG	5	abscisic acid responsive
MSTRG.30281	TGACG-motif	TGACG	5	MeJA-responsive
MSTRG.30281	CGTCA-motif	CGTCA	5	MeJA-responsive
MSTRG.30302	ABRE	ACGTG	5	abscisic acid responsive
MSTRG.30302	ABRE	ACGTG	5	abscisic acid responsive
MSTRG.30302	ABRE	ACGTG	5	abscisic acid responsive
MSTRG.30302	TGACG-motif	TGACG	5	MeJA-responsive
MSTRG.30302	TGACG-motif	TGACG	5	MeJA-responsive
MSTRG.30302	P-box	CCTTTTG	7	gibberellin-responsive
MSTRG.30302	CGTCA-motif	CGTCA	5	MeJA-responsive
MSTRG.30302	CGTCA-motif	CGTCA	5	MeJA-responsive
MSTRG.30960	ABRE	ACGTG	5	abscisic acid responsive
MSTRG.30960	TCA-element	CCATCTTTTT	9	salicylic acid responsive
MSTRG.30960	TCA-element	CCATCTTTTT	9	salicylic acid responsive
MSTRG.30960	GARE-motif	TCTGTTG	7	gibberellin-responsive
MSTRG.30960	TGACG-motif	TGACG	5	MeJA-responsive
MSTRG.30960	TGACG-motif	TGACG	5	MeJA-responsive
MSTRG.30960	CGTCA-motif	CGTCA	5	MeJA-responsive
MSTRG.30960	CGTCA-motif	CGTCA	5	MeJA-responsive
MSTRG.30997	TGA-element	AACGAC	6	auxin-responsive
MSTRG.30997	TGA-element	AACGAC	6	auxin-responsive
MSTRG.30999	CGTCA-motif	CGTCA	5	MeJA-responsive
MSTRG.30999	ABRE	CACGTG	6	abscisic acid responsive
MSTRG.30999	ABRE	ACGTG	5	abscisic acid responsive
MSTRG.30999	ABRE	ACGTG	5	abscisic acid responsive
MSTRG.30999	ABRE	ACGTG	5	abscisic acid responsive
MSTRG.30999	TGACG-motif	TGACG	5	MeJA-responsive
MSTRG.31023	CGTCA-motif	CGTCA	5	MeJA-responsive
MSTRG.31023	CGTCA-motif	CGTCA	5	MeJA-responsive
MSTRG.31023	TC-rich repeats	ATTCTCTAAC	9	defense and stress responsive
MSTRG.31023	TGACG-motif	TGACG	5	MeJA-responsive
MSTRG.31023	TGACG-motif	TGACG	5	MeJA-responsive
MSTRG.31023	AuxRR-core	GGTCCAT	7	auxin-responsive
MSTRG.31023	TGA-element	AACGAC	6	auxin-responsive
MSTRG.31023	ABRE	CACGTG	6	abscisic acid responsive
MSTRG.31023	ABRE	ACGTG	5	abscisic acid responsive
MSTRG.31117	ABRE	ACGTG	5	abscisic acid responsive
MSTRG.30383	GARE-motif	TCTGTTG	7	gibberellin-responsive
MSTRG.30383	ABRE	TACGTGTC	8	abscisic acid responsive
MSTRG.30383	ABRE	ACGTG	5	abscisic acid responsive
MSTRG.30383	TCA-element	CCATCTTTTT	9	salicylic acid responsive
MSTRG.30383	TGACG-motif	TGACG	5	MeJA-responsive
MSTRG.30383	CGTCA-motif	CGTCA	5	MeJA-responsive
MSTRG.4776	TGACG-motif	TGACG	5	MeJA-responsive
MSTRG.4776	ABRE	ACGTG	5	abscisic acid responsive
MSTRG.4776	CGTCA-motif	CGTCA	5	MeJA-responsive
MSTRG.5069	ABRE	ACGTG	5	abscisic acid responsive
MSTRG.5438	CGTCA-motif	CGTCA	5	MeJA-responsive
MSTRG.5438	CGTCA-motif	CGTCA	5	MeJA-responsive
MSTRG.5438	TGA-element	AACGAC	6	auxin-responsive
MSTRG.5438	TC-rich repeats	ATTCTCTAAC	9	defense and stress responsive
MSTRG.5438	TGACG-motif	TGACG	5	MeJA-responsive
MSTRG.5438	TGACG-motif	TGACG	5	MeJA-responsive
MSTRG.5487	P-box	CCTTTTG	7	gibberellin-responsive
MSTRG.5487	P-box	CCTTTTG	7	gibberellin-responsive
MSTRG.5487	TGA-element	AACGAC	6	auxin-responsive
MSTRG.5487	TGACG-motif	TGACG	5	MeJA-responsive
MSTRG.5487	CGTCA-motif	CGTCA	5	MeJA-responsive
MSTRG.5487	ABRE	ACGTG	5	abscisic acid responsive
MSTRG.5487	ABRE	ACGTG	5	abscisic acid responsive
MSTRG.5487	TCA-element	CCATCTTTTT	9	salicylic acid responsive
MSTRG.5487	TCA-element	TCAGAAGAGG	9	salicylic acid responsive
MSTRG.5488	TGA-element	AACGAC	6	auxin-responsive
MSTRG.5570	CGTCA-motif	CGTCA	5	MeJA-responsive
MSTRG.5570	TGACG-motif	TGACG	5	MeJA-responsive
MSTRG.5570	ABRE	ACGTG	5	abscisic acid responsive
MSTRG.5570	ABRE	AACCCGG	7	abscisic acid responsive
MSTRG.5570	ABRE	ACGTG	5	abscisic acid responsive
MSTRG.5570	TATC-box	TATCCCA	7	gibberellin-responsive
MSTRG.5734	TGA-element	AACGAC	6	auxin-responsive
MSTRG.5734	CGTCA-motif	CGTCA	5	MeJA-responsive
MSTRG.5734	TGACG-motif	TGACG	5	MeJA-responsive
MSTRG.5734	ABRE	ACGTG	5	abscisic acid responsive
MSTRG.5734	ABRE	GACACGTGGC	9	abscisic acid responsive
MSTRG.5734	ABRE	ACGTG	5	abscisic acid responsive
MSTRG.5734	ABRE	ACGTG	5	abscisic acid responsive
MSTRG.5734	ABRE	ACGTG	5	abscisic acid responsive
MSTRG.5734	ABRE	GCCGCGTGGC	9	abscisic acid responsive
MSTRG.5734	ABRE	CACGTG	6	abscisic acid responsive
MSTRG.5734	ABRE	ACGTG	5	abscisic acid responsive
MSTRG.5734	ABRE	CACGTG	6	abscisic acid responsive
MSTRG.5734	ABRE	ACGTG	5	abscisic acid responsive
MSTRG.5817	TGACG-motif	TGACG	5	MeJA-responsive
MSTRG.5817	CGTCA-motif	CGTCA	5	MeJA-responsive
MSTRG.5817	ABRE	ACGTG	5	abscisic acid responsive
MSTRG.3470	TATC-box	TATCCCA	7	gibberellin-responsive
MSTRG.3470	TCA-element	CCATCTTTTT	9	salicylic acid responsive
MSTRG.3470	TGA-element	AACGAC	6	auxin-responsive
MSTRG.3542	AuxRR-core	GGTCCAT	7	auxin-responsive
MSTRG.3542	TGACG-motif	TGACG	5	MeJA-responsive
MSTRG.3542	CGTCA-motif	CGTCA	5	MeJA-responsive
MSTRG.3542	GARE-motif	TCTGTTG	7	gibberellin-responsive
MSTRG.3542	TGA-element	AACGAC	6	auxin-responsive
MSTRG.3542	TGA-element	AACGAC	6	auxin-responsive
MSTRG.3973	TATC-box	TATCCCA	7	gibberellin-responsive
MSTRG.3973	TGA-element	AACGAC	6	auxin-responsive
MSTRG.3973	GARE-motif	TCTGTTG	7	gibberellin-responsive
MSTRG.4018	TGACG-motif	TGACG	5	MeJA-responsive
MSTRG.4018	ABRE	ACGTG	5	abscisic acid responsive
MSTRG.4018	TCA-element	CCATCTTTTT	9	salicylic acid responsive
MSTRG.4018	TATC-box	TATCCCA	7	gibberellin-responsive
MSTRG.4018	GARE-motif	TCTGTTG	7	gibberellin-responsive
MSTRG.4018	CGTCA-motif	CGTCA	5	MeJA-responsive
MSTRG.4041	ABRE	ACGTG	5	abscisic acid responsive
MSTRG.4041	TGACG-motif	TGACG	5	MeJA-responsive
MSTRG.4041	TC-rich repeats	ATTCTCTAAC	9	defense and stress responsive
MSTRG.4041	CGTCA-motif	CGTCA	5	MeJA-responsive
MSTRG.4086	TC-rich repeats	ATTCTCTAAC	9	defense and stress responsive
MSTRG.4086	TC-rich repeats	ATTCTCTAAC	9	defense and stress responsive
MSTRG.4086	TCA-element	CCATCTTTTT	9	salicylic acid responsive
MSTRG.4086	P-box	CCTTTTG	7	gibberellin-responsive
MSTRG.4176	TC-rich repeats	ATTCTCTAAC	9	defense and stress responsive
MSTRG.4638	CGTCA-motif	CGTCA	5	MeJA-responsive
MSTRG.4638	CGTCA-motif	CGTCA	5	MeJA-responsive
MSTRG.4638	P-box	CCTTTTG	7	gibberellin-responsive
MSTRG.4638	TCA-element	CCATCTTTTT	9	salicylic acid responsive
MSTRG.4638	TGACG-motif	TGACG	5	MeJA-responsive
MSTRG.4638	TGACG-motif	TGACG	5	MeJA-responsive
MSTRG.4638	ABRE	ACGTG	5	abscisic acid responsive
MSTRG.4638	ABRE	ACGTG	5	abscisic acid responsive
MSTRG.4638	ABRE	ACGTG	5	abscisic acid responsive
MSTRG.7190	GARE-motif	TCTGTTG	7	gibberellin-responsive
MSTRG.7190	CGTCA-motif	CGTCA	5	MeJA-responsive
MSTRG.7190	TGACG-motif	TGACG	5	MeJA-responsive
MSTRG.7190	ABRE	ACGTG	5	abscisic acid responsive
MSTRG.6170	CGTCA-motif	CGTCA	5	MeJA-responsive
MSTRG.6170	TGACG-motif	TGACG	5	MeJA-responsive
MSTRG.6237	CGTCA-motif	CGTCA	5	MeJA-responsive
MSTRG.6237	TGACG-motif	TGACG	5	MeJA-responsive
MSTRG.6504	CGTCA-motif	CGTCA	5	MeJA-responsive
MSTRG.6504	TGA-element	AACGAC	6	auxin-responsive
MSTRG.6504	P-box	CCTTTTG	7	gibberellin-responsive
MSTRG.6504	ABRE	GACACGTGGC	9	abscisic acid responsive
MSTRG.6504	ABRE	CACGTG	6	abscisic acid responsive
MSTRG.6504	ABRE	ACGTG	5	abscisic acid responsive
MSTRG.6504	ABRE	CACGTG	6	abscisic acid responsive
MSTRG.6504	ABRE	ACGTG	5	abscisic acid responsive
MSTRG.6504	ABRE	GCAACGTGTC	9	abscisic acid responsive
MSTRG.6504	ABRE	CACGTG	6	abscisic acid responsive
MSTRG.6504	ABRE	ACGTG	5	abscisic acid responsive
MSTRG.6504	TGACG-motif	TGACG	5	MeJA-responsive
MSTRG.6508	ABRE	ACGTG	5	abscisic acid responsive
MSTRG.6549	CGTCA-motif	CGTCA	5	MeJA-responsive
MSTRG.6549	CGTCA-motif	CGTCA	5	MeJA-responsive
MSTRG.6549	P-box	CCTTTTG	7	gibberellin-responsive
MSTRG.6549	P-box	CCTTTTG	7	gibberellin-responsive
MSTRG.6549	TGACG-motif	TGACG	5	MeJA-responsive
MSTRG.6549	TGACG-motif	TGACG	5	MeJA-responsive
MSTRG.6555	CGTCA-motif	CGTCA	5	MeJA-responsive
MSTRG.6555	CGTCA-motif	CGTCA	5	MeJA-responsive
MSTRG.6555	CGTCA-motif	CGTCA	5	MeJA-responsive
MSTRG.6555	CGTCA-motif	CGTCA	5	MeJA-responsive
MSTRG.6555	TGACG-motif	TGACG	5	MeJA-responsive
MSTRG.6555	TGACG-motif	TGACG	5	MeJA-responsive
MSTRG.6555	TGACG-motif	TGACG	5	MeJA-responsive
MSTRG.6555	TGACG-motif	TGACG	5	MeJA-responsive
MSTRG.6574	CGTCA-motif	CGTCA	5	MeJA-responsive
MSTRG.6574	TC-rich repeats	ATTCTCTAAC	9	defense and stress responsive
MSTRG.6574	TGACG-motif	TGACG	5	MeJA-responsive
MSTRG.6617	TGA-element	AACGAC	6	auxin-responsive
MSTRG.6617	TGA-element	AACGAC	6	auxin-responsive
MSTRG.6617	CGTCA-motif	CGTCA	5	MeJA-responsive
MSTRG.6617	TGACG-motif	TGACG	5	MeJA-responsive
MSTRG.6617	ABRE	ACGTG	5	abscisic acid responsive
MSTRG.6617	ABRE	ACGTG	5	abscisic acid responsive
MSTRG.6636	ABRE	ACGTG	5	abscisic acid responsive
MSTRG.6636	ABRE	ACGTG	5	abscisic acid responsive
MSTRG.6005	TCA-element	CCATCTTTTT	9	salicylic acid responsive
MSTRG.6005	TC-rich repeats	ATTCTCTAAC	9	defense and stress responsive
MSTRG.6005	ABRE	ACGTG	5	abscisic acid responsive
MSTRG.6005	P-box	CCTTTTG	7	gibberellin-responsive
MSTRG.9197	CGTCA-motif	CGTCA	5	MeJA-responsive
MSTRG.9197	CGTCA-motif	CGTCA	5	MeJA-responsive
MSTRG.9197	TGACG-motif	TGACG	5	MeJA-responsive
MSTRG.9197	TGACG-motif	TGACG	5	MeJA-responsive
MSTRG.9402	CGTCA-motif	CGTCA	5	MeJA-responsive
MSTRG.9402	ABRE	ACGTG	5	abscisic acid responsive
MSTRG.9402	ABRE	ACGTG	5	abscisic acid responsive
MSTRG.9402	TGACG-motif	TGACG	5	MeJA-responsive
MSTRG.9635	GARE-motif	TCTGTTG	7	gibberellin-responsive
MSTRG.9635	TCA-element	TCAGAAGAGG	9	salicylic acid responsive
MSTRG.9635	TC-rich repeats	ATTCTCTAAC	9	defense and stress responsive
MSTRG.8211	TCA-element	TCAGAAGAGG	10	salicylic acid responsive
MSTRG.8211	ABRE	CACGTG	6	abscisic acid responsive
MSTRG.8211	ABRE	ACGTG	5	abscisic acid responsive
MSTRG.8211	ABRE	ACGTG	5	abscisic acid responsive
MSTRG.8419	TCA-element	CCATCTTTTT	9	salicylic acid responsive
MSTRG.8419	TC-rich repeats	GTTTTCTTAC	9	defense and stress responsive
MSTRG.8549	TCA-element	TCAGAAGAGG	9	salicylic acid responsive
MSTRG.8549	TCA-element	CCATCTTTTT	9	salicylic acid responsive
MSTRG.8549	TGACG-motif	TGACG	5	MeJA-responsive
MSTRG.8549	CGTCA-motif	CGTCA	5	MeJA-responsive
MSTRG.8549	TGA-element	AACGAC	6	auxin-responsive
MSTRG.8549	TGA-element	AACGAC	6	auxin-responsive
MSTRG.8549	P-box	CCTTTTG	7	gibberellin-responsive
MSTRG.8696	CGTCA-motif	CGTCA	5	MeJA-responsive
MSTRG.8696	CGTCA-motif	CGTCA	5	MeJA-responsive
MSTRG.8696	TGACG-motif	TGACG	5	MeJA-responsive
MSTRG.8696	TGACG-motif	TGACG	5	MeJA-responsive
MSTRG.8696	AuxRR-core	GGTCCAT	7	auxin-responsive
MSTRG.8947	P-box	CCTTTTG	7	gibberellin-responsive
MSTRG.8947	TC-rich repeats	GTTTTCTTAC	9	defense and stress responsive
MSTRG.8947	TC-rich repeats	ATTCTCTAAC	9	defense and stress responsive
MSTRG.8947	TGACG-motif	TGACG	5	MeJA-responsive
MSTRG.8947	CGTCA-motif	CGTCA	5	MeJA-responsive
MSTRG.11047	TGA-element	AACGAC	6	auxin-responsive
MSTRG.11047	CGTCA-motif	CGTCA	5	MeJA-responsive
MSTRG.11047	TGACG-motif	TGACG	5	MeJA-responsive
MSTRG.11047	ABRE	ACGTG	5	abscisic acid responsive
MSTRG.11287	P-box	CCTTTTG	7	gibberellin-responsive
MSTRG.11287	CGTCA-motif	CGTCA	5	MeJA-responsive
MSTRG.11287	TGA-element	AACGAC	6	auxin-responsive
MSTRG.11287	AuxRR-core	GGTCCAT	7	auxin-responsive
MSTRG.11287	TGACG-motif	TGACG	5	MeJA-responsive
MSTRG.11447	ABRE	ACGTG	5	abscisic acid responsive
MSTRG.10000	TCA-element	TCAGAAGAGG	9	salicylic acid responsive
MSTRG.10000	ABRE	ACGTG	5	abscisic acid responsive
MSTRG.10000	TGACG-motif	TGACG	5	MeJA-responsive
MSTRG.10000	P-box	CCTTTTG	7	gibberellin-responsive
MSTRG.10000	CGTCA-motif	CGTCA	5	MeJA-responsive
MSTRG.10173	TATC-box	TATCCCA	7	gibberellin-responsive
MSTRG.10173	CGTCA-motif	CGTCA	5	MeJA-responsive
MSTRG.10173	CGTCA-motif	CGTCA	5	MeJA-responsive
MSTRG.10173	ABRE	ACGTG	5	abscisic acid responsive
MSTRG.10173	ABRE	GACACGTGGC	9	abscisic acid responsive
MSTRG.10173	ABRE	ACGTG	5	abscisic acid responsive
MSTRG.10173	TGACG-motif	TGACG	5	MeJA-responsive
MSTRG.10173	TGACG-motif	TGACG	5	MeJA-responsive
MSTRG.10299	CGTCA-motif	CGTCA	5	MeJA-responsive
MSTRG.10299	TGACG-motif	TGACG	5	MeJA-responsive
MSTRG.10461	ABRE	ACGTG	5	abscisic acid responsive
MSTRG.10461	ABRE	CACGTG	6	abscisic acid responsive
MSTRG.10461	ABRE	ACGTG	5	abscisic acid responsive
MSTRG.10461	ABRE	CACGTG	6	abscisic acid responsive
MSTRG.10461	ABRE	ACGTG	5	abscisic acid responsive
MSTRG.10461	TC-rich repeats	GTTTTCTTAC	9	defense and stress responsive
MSTRG.10512	CGTCA-motif	CGTCA	5	MeJA-responsive
MSTRG.10512	TGACG-motif	TGACG	5	MeJA-responsive
MSTRG.10512	TC-rich repeats	ATTCTCTAAC	9	defense and stress responsive
MSTRG.10512	ABRE	ACGTG	5	abscisic acid responsive
MSTRG.10512	ABRE	ACGTG	5	abscisic acid responsive
MSTRG.10774	TATC-box	TATCCCA	7	gibberellin-responsive
MSTRG.10774	TCA-element	CCATCTTTTT	9	salicylic acid responsive
MSTRG.10774	TGACG-motif	TGACG	5	MeJA-responsive
MSTRG.10774	CGTCA-motif	CGTCA	5	MeJA-responsive
MSTRG.10831	P-box	CCTTTTG	7	gibberellin-responsive
MSTRG.10831	ABRE	ACGTG	5	abscisic acid responsive
MSTRG.10990	P-box	CCTTTTG	7	gibberellin-responsive
MSTRG.10990	TGA-element	AACGAC	6	auxin-responsive
MSTRG.10990	TGA-element	AACGAC	6	auxin-responsive
MSTRG.10990	ABRE	ACGTG	5	abscisic acid responsive
MSTRG.11916	CGTCA-motif	CGTCA	5	MeJA-responsive
MSTRG.11916	TGA-element	AACGAC	6	auxin-responsive
MSTRG.11916	TGA-element	AACGAC	6	auxin-responsive
MSTRG.11916	GARE-motif	TCTGTTG	7	gibberellin-responsive
MSTRG.11916	ABRE	ACGTG	5	abscisic acid responsive
MSTRG.11916	ABRE	ACGTG	5	abscisic acid responsive
MSTRG.11916	TC-rich repeats	GTTTTCTTAC	9	defense and stress responsive
MSTRG.11916	TGACG-motif	TGACG	5	MeJA-responsive
MSTRG.12018	ABRE	ACGTG	5	abscisic acid responsive
MSTRG.12018	ABRE	ACGTG	5	abscisic acid responsive
MSTRG.12018	TGACG-motif	TGACG	5	MeJA-responsive
MSTRG.12018	TGACG-motif	TGACG	5	MeJA-responsive
MSTRG.12018	CGTCA-motif	CGTCA	5	MeJA-responsive
MSTRG.12018	CGTCA-motif	CGTCA	5	MeJA-responsive
MSTRG.12018	TGA-element	AACGAC	6	auxin-responsive
MSTRG.12060	TATC-box	TATCCCA	7	gibberellin-responsive
MSTRG.12060	TGA-element	AACGAC	6	auxin-responsive
MSTRG.12138	P-box	CCTTTTG	7	gibberellin-responsive
MSTRG.12173	ABRE	ACGTG	5	abscisic acid responsive
MSTRG.12173	ABRE	GACACGTGGC	9	abscisic acid responsive
MSTRG.12173	ABRE	CACGTG	6	abscisic acid responsive
MSTRG.12173	ABRE	ACGTG	5	abscisic acid responsive
MSTRG.12173	TGACG-motif	TGACG	5	MeJA-responsive
MSTRG.12173	CGTCA-motif	CGTCA	5	MeJA-responsive
MSTRG.12173	GARE-motif	TCTGTTG	7	gibberellin-responsive
MSTRG.12356	CGTCA-motif	CGTCA	5	MeJA-responsive
MSTRG.12356	CGTCA-motif	CGTCA	5	MeJA-responsive
MSTRG.12356	P-box	CAACAAACCCCTT	12	gibberellin-responsive
MSTRG.12356	ABRE	AACCCGG	7	abscisic acid responsive
MSTRG.12356	TGACG-motif	TGACG	5	MeJA-responsive
MSTRG.12356	TGACG-motif	TGACG	5	MeJA-responsive
MSTRG.12356	AuxRR-core	GGTCCAT	7	auxin-responsive
MSTRG.12598	TATC-box	TATCCCA	7	gibberellin-responsive
MSTRG.12770	ABRE	ACGTG	5	abscisic acid responsive
MSTRG.12770	TGA-element	AACGAC	6	auxin-responsive
MSTRG.12770	TGA-element	AACGAC	6	auxin-responsive
MSTRG.12770	GARE-motif	TCTGTTG	7	gibberellin-responsive
MSTRG.12848	AuxRR-core	GGTCCAT	7	auxin-responsive
MSTRG.12848	TC-rich repeats	ATTCTCTAAC	9	defense and stress responsive
MSTRG.12848	TGACG-motif	TGACG	5	MeJA-responsive
MSTRG.12848	CGTCA-motif	CGTCA	5	MeJA-responsive
MSTRG.12848	TGA-element	AACGAC	6	auxin-responsive
MSTRG.12848	TGA-element	AACGAC	6	auxin-responsive
MSTRG.14409	GARE-motif	TCTGTTG	7	gibberellin-responsive
MSTRG.13273	TGACG-motif	TGACG	5	MeJA-responsive
MSTRG.13273	TGACG-motif	TGACG	5	MeJA-responsive
MSTRG.13273	TGACG-motif	TGACG	5	MeJA-responsive
MSTRG.13273	ABRE	ACGTG	5	abscisic acid responsive
MSTRG.13273	TCA-element	CCATCTTTTT	9	salicylic acid responsive
MSTRG.13273	GARE-motif	TCTGTTG	7	gibberellin-responsive
MSTRG.13273	CGTCA-motif	CGTCA	5	MeJA-responsive
MSTRG.13273	CGTCA-motif	CGTCA	5	MeJA-responsive
MSTRG.13273	CGTCA-motif	CGTCA	5	MeJA-responsive
MSTRG.13653	GARE-motif	TCTGTTG	7	gibberellin-responsive
MSTRG.13653	TGA-element	AACGAC	6	auxin-responsive
MSTRG.13653	CGTCA-motif	CGTCA	5	MeJA-responsive
MSTRG.13653	AuxRE	TGTCTCAATAAG	11	auxin-responsive
MSTRG.13653	TGACG-motif	TGACG	5	MeJA-responsive
MSTRG.13653	ABRE	CGTACGTGCA	9	abscisic acid responsive
MSTRG.13653	ABRE	ACGTG	5	abscisic acid responsive
MSTRG.13871	TGA-element	AACGAC	6	auxin-responsive
MSTRG.13871	ABRE	CGTACGTGCA	9	abscisic acid responsive
MSTRG.13871	ABRE	CACGTG	6	abscisic acid responsive
MSTRG.13871	ABRE	ACGTG	5	abscisic acid responsive
MSTRG.13871	AuxRR-core	GGTCCAT	7	auxin-responsive
MSTRG.13325	CGTCA-motif	CGTCA	5	MeJA-responsive
MSTRG.13325	TGACG-motif	TGACG	5	MeJA-responsive
MSTRG.14071	TGACG-motif	TGACG	5	MeJA-responsive
MSTRG.14071	ABRE	ACGTG	5	abscisic acid responsive
MSTRG.14071	TCA-element	CCATCTTTTT	9	salicylic acid responsive
MSTRG.14071	CGTCA-motif	CGTCA	5	MeJA-responsive
MSTRG.14150	ABRE	ACGTG	5	abscisic acid responsive
MSTRG.14233	ABRE	CACGTG	6	abscisic acid responsive
MSTRG.14233	ABRE	ACGTG	5	abscisic acid responsive
MSTRG.14356	ABRE	ACGTG	5	abscisic acid responsive
MSTRG.14356	ABRE	ACGTG	5	abscisic acid responsive
MSTRG.14356	TC-rich repeats	GTTTTCTTAC	9	defense and stress responsive
MSTRG.14736	TGA-element	AACGAC	6	auxin-responsive
MSTRG.14736	CGTCA-motif	CGTCA	5	MeJA-responsive
MSTRG.14736	CGTCA-motif	CGTCA	5	MeJA-responsive
MSTRG.14736	TGACG-motif	TGACG	5	MeJA-responsive
MSTRG.14736	TGACG-motif	TGACG	5	MeJA-responsive
MSTRG.14736	ABRE	ACGTG	5	abscisic acid responsive
MSTRG.14736	ABRE	ACGTG	5	abscisic acid responsive
MSTRG.14736	ABRE	ACGTG	5	abscisic acid responsive
MSTRG.14858	GARE-motif	TCTGTTG	7	gibberellin-responsive
MSTRG.15207	CGTCA-motif	CGTCA	5	MeJA-responsive
MSTRG.15207	TATC-box	TATCCCA	7	gibberellin-responsive
MSTRG.15207	TGACG-motif	TGACG	5	MeJA-responsive
MSTRG.15207	ABRE	ACGTG	5	abscisic acid responsive
MSTRG.15212	AuxRR-core	GGTCCAT	7	auxin-responsive
MSTRG.15212	ABRE	ACGTG	5	abscisic acid responsive
MSTRG.15212	TC-rich repeats	GTTTTCTTAC	9	defense and stress responsive
MSTRG.15212	TGACG-motif	TGACG	5	MeJA-responsive
MSTRG.15212	P-box	CCTTTTG	7	gibberellin-responsive
MSTRG.15212	CGTCA-motif	CGTCA	5	MeJA-responsive
MSTRG.15344	CGTCA-motif	CGTCA	5	MeJA-responsive
MSTRG.15344	TGACG-motif	TGACG	5	MeJA-responsive
MSTRG.15566	TGACG-motif	TGACG	5	MeJA-responsive
MSTRG.15566	CGTCA-motif	CGTCA	5	MeJA-responsive
MSTRG.15616	TGACG-motif	TGACG	5	MeJA-responsive
MSTRG.15616	TGACG-motif	TGACG	5	MeJA-responsive
MSTRG.15616	TCA-element	CCATCTTTTT	9	salicylic acid responsive
MSTRG.15616	TATC-box	TATCCCA	7	gibberellin-responsive
MSTRG.15616	TGA-element	AACGAC	6	auxin-responsive
MSTRG.15616	CGTCA-motif	CGTCA	5	MeJA-responsive
MSTRG.15616	CGTCA-motif	CGTCA	5	MeJA-responsive
MSTRG.14646	CGTCA-motif	CGTCA	5	MeJA-responsive
MSTRG.14646	CGTCA-motif	CGTCA	5	MeJA-responsive
MSTRG.14646	CGTCA-motif	CGTCA	5	MeJA-responsive
MSTRG.14646	TGACG-motif	TGACG	5	MeJA-responsive
MSTRG.14646	TGACG-motif	TGACG	5	MeJA-responsive
MSTRG.14646	TGACG-motif	TGACG	5	MeJA-responsive
MSTRG.14646	TGA-box	TGACGTAA	8	auxin-responsive
MSTRG.14646	TC-rich repeats	ATTCTCTAAC	9	defense and stress responsive
MSTRG.14413	TGACG-motif	TGACG	5	MeJA-responsive
MSTRG.14413	CGTCA-motif	CGTCA	5	MeJA-responsive
MSTRG.14976	GARE-motif	TCTGTTG	7	gibberellin-responsive
MSTRG.14976	ABRE	ACGTG	5	abscisic acid responsive
MSTRG.14976	ABRE	ACGTG	5	abscisic acid responsive
MSTRG.14976	TGACG-motif	TGACG	5	MeJA-responsive
MSTRG.14976	CGTCA-motif	CGTCA	5	MeJA-responsive
MSTRG.15077	TGACG-motif	TGACG	5	MeJA-responsive
MSTRG.15077	TGACG-motif	TGACG	5	MeJA-responsive
MSTRG.15077	P-box	CCTTTTG	7	gibberellin-responsive
MSTRG.15077	TGA-element	AACGAC	6	auxin-responsive
MSTRG.15077	TGA-element	AACGAC	6	auxin-responsive
MSTRG.15077	CGTCA-motif	CGTCA	5	MeJA-responsive
MSTRG.15077	CGTCA-motif	CGTCA	5	MeJA-responsive
MSTRG.15099	ABRE	ACGTG	5	abscisic acid responsive
MSTRG.15099	ABRE	ACGTG	5	abscisic acid responsive
MSTRG.15204	P-box	CCTTTTG	7	gibberellin-responsive
MSTRG.15204	TGACG-motif	TGACG	5	MeJA-responsive
MSTRG.15204	CGTCA-motif	CGTCA	5	MeJA-responsive
MSTRG.15204	ABRE	ACGTG	5	abscisic acid responsive
MSTRG.15204	ABRE	ACGTG	5	abscisic acid responsive
MSTRG.15204	TATC-box	TATCCCA	7	gibberellin-responsive
MSTRG.15204	TATC-box	TATCCCA	7	gibberellin-responsive
MSTRG.15204	TGA-element	AACGAC	6	auxin-responsive
MSTRG.16105	TGACG-motif	TGACG	5	MeJA-responsive
MSTRG.16105	TGACG-motif	TGACG	5	MeJA-responsive
MSTRG.16105	CGTCA-motif	CGTCA	5	MeJA-responsive
MSTRG.16105	CGTCA-motif	CGTCA	5	MeJA-responsive
MSTRG.16109	TCA-element	CCATCTTTTT	9	salicylic acid responsive
MSTRG.16109	SARE	TTCGACCATCTT	11	salicylic acid responsive
MSTRG.16109	GARE-motif	TCTGTTG	7	gibberellin-responsive
MSTRG.16109	P-box	CCTTTTG	7	gibberellin-responsive
MSTRG.16109	TATC-box	TATCCCA	7	gibberellin-responsive
MSTRG.15726	P-box	CCTTTTG	7	gibberellin-responsive
MSTRG.15726	TGACG-motif	TGACG	5	MeJA-responsive
MSTRG.15726	TGACG-motif	TGACG	5	MeJA-responsive
MSTRG.15726	TATC-box	TATCCCA	7	gibberellin-responsive
MSTRG.15726	CGTCA-motif	CGTCA	5	MeJA-responsive
MSTRG.15726	CGTCA-motif	CGTCA	5	MeJA-responsive
MSTRG.16371	ABRE	GCAACGTGTC	9	abscisic acid responsive
MSTRG.16371	TCA-element	CCATCTTTTT	9	salicylic acid responsive
MSTRG.16555	TC-rich repeats	GTTTTCTTAC	9	defense and stress responsive
MSTRG.16555	AuxRR-core	GGTCCAT	7	auxin-responsive
MSTRG.16643	CGTCA-motif	CGTCA	5	MeJA-responsive
MSTRG.16643	TGACG-motif	TGACG	5	MeJA-responsive
MSTRG.16643	TC-rich repeats	GTTTTCTTAC	9	defense and stress responsive
MSTRG.16829	TC-rich repeats	ATTCTCTAAC	9	defense and stress responsive
MSTRG.16829	ABRE	ACGTG	5	abscisic acid responsive
MSTRG.16829	ABRE	ACGTG	5	abscisic acid responsive
MSTRG.16829	TGACG-motif	TGACG	5	MeJA-responsive
MSTRG.16829	TGACG-motif	TGACG	5	MeJA-responsive
MSTRG.16829	TGACG-motif	TGACG	5	MeJA-responsive
MSTRG.16829	TGACG-motif	TGACG	5	MeJA-responsive
MSTRG.16829	CGTCA-motif	CGTCA	5	MeJA-responsive
MSTRG.16829	CGTCA-motif	CGTCA	5	MeJA-responsive
MSTRG.16829	CGTCA-motif	CGTCA	5	MeJA-responsive
MSTRG.16829	CGTCA-motif	CGTCA	5	MeJA-responsive
MSTRG.16829	TCA-element	CCATCTTTTT	9	salicylic acid responsive
MSTRG.16965	TGACG-motif	TGACG	5	MeJA-responsive
MSTRG.16965	TCA-element	CCATCTTTTT	9	salicylic acid responsive
MSTRG.16965	CGTCA-motif	CGTCA	5	MeJA-responsive
MSTRG.16965	SARE	TTCGACCATCTT	11	salicylic acid responsive
MSTRG.17078	GARE-motif	TCTGTTG	7	gibberellin-responsive
MSTRG.17078	TGACG-motif	TGACG	5	MeJA-responsive
MSTRG.17078	CGTCA-motif	CGTCA	5	MeJA-responsive
MSTRG.17392	ABRE	ACGTG	5	abscisic acid responsive
MSTRG.17429	ABRE	ACGTG	5	abscisic acid responsive
MSTRG.17429	ABRE	ACGTG	5	abscisic acid responsive
MSTRG.17438	TGA-element	AACGAC	6	auxin-responsive
MSTRG.17438	CGTCA-motif	CGTCA	5	MeJA-responsive
MSTRG.17438	TCA-element	CCATCTTTTT	9	salicylic acid responsive
MSTRG.17438	TCA-element	CCATCTTTTT	9	salicylic acid responsive
MSTRG.17438	ABRE	ACGTG	5	abscisic acid responsive
MSTRG.17438	TGACG-motif	TGACG	5	MeJA-responsive
MSTRG.17469	ABRE	CACGTG	6	abscisic acid responsive
MSTRG.17469	ABRE	ACGTG	5	abscisic acid responsive
MSTRG.17469	ABRE	ACGTG	5	abscisic acid responsive
MSTRG.17469	TCA-element	CCATCTTTTT	9	salicylic acid responsive
MSTRG.17469	CGTCA-motif	CGTCA	5	MeJA-responsive
MSTRG.17469	TGACG-motif	TGACG	5	MeJA-responsive
MSTRG.17469	P-box	CCTTTTG	7	gibberellin-responsive
MSTRG.17555	ABRE	ACGTG	5	abscisic acid responsive
MSTRG.17767	ABRE	ACGTG	5	abscisic acid responsive
MSTRG.17767	ABRE	ACGTG	5	abscisic acid responsive
MSTRG.17767	ABRE	ACGTG	5	abscisic acid responsive
MSTRG.17767	TC-rich repeats	ATTCTCTAAC	9	defense and stress responsive
MSTRG.17767	TC-rich repeats	GTTTTCTTAC	9	defense and stress responsive
MSTRG.17767	TCA-element	TCAGAAGAGG	9	salicylic acid responsive
MSTRG.17767	CGTCA-motif	CGTCA	5	MeJA-responsive
MSTRG.17767	TGACG-motif	TGACG	5	MeJA-responsive
MSTRG.17821	ABRE	ACGTG	5	abscisic acid responsive
MSTRG.17821	ABRE	ACGTG	5	abscisic acid responsive
MSTRG.17821	TC-rich repeats	GTTTTCTTAC	9	defense and stress responsive
MSTRG.17821	TATC-box	TATCCCA	7	gibberellin-responsive
MSTRG.17821	P-box	CCTTTTG	7	gibberellin-responsive
MSTRG.17932	P-box	CCTTTTG	7	gibberellin-responsive
MSTRG.18057	TC-rich repeats	GTTTTCTTAC	9	defense and stress responsive
MSTRG.18234	P-box	CCTTTTG	7	gibberellin-responsive
MSTRG.18273	TC-rich repeats	GTTTTCTTAC	9	defense and stress responsive
MSTRG.18273	TGACG-motif	TGACG	5	MeJA-responsive
MSTRG.18273	P-box	CCTTTTG	7	gibberellin-responsive
MSTRG.18273	AuxRR-core	GGTCCAT	7	auxin-responsive
MSTRG.18273	TCA-element	CCATCTTTTT	9	salicylic acid responsive
MSTRG.18273	CGTCA-motif	CGTCA	5	MeJA-responsive
MSTRG.18420	P-box	CCTTTTG	7	gibberellin-responsive
MSTRG.18420	P-box	CCTTTTG	7	gibberellin-responsive
MSTRG.18420	ABRE	ACGTG	5	abscisic acid responsive
MSTRG.18687	AuxRR-core	GGTCCAT	7	auxin-responsive
MSTRG.18687	TCA-element	CCATCTTTTT	9	salicylic acid responsive
MSTRG.19216	TC-rich repeats	GTTTTCTTAC	9	defense and stress responsive
MSTRG.19220	CGTCA-motif	CGTCA	5	MeJA-responsive
MSTRG.19220	CGTCA-motif	CGTCA	5	MeJA-responsive
MSTRG.19220	TGACG-motif	TGACG	5	MeJA-responsive
MSTRG.19220	TGACG-motif	TGACG	5	MeJA-responsive
MSTRG.19354	P-box	CCTTTTG	7	gibberellin-responsive
MSTRG.19354	TGACG-motif	TGACG	5	MeJA-responsive
MSTRG.19354	AuxRR-core	GGTCCAT	7	auxin-responsive
MSTRG.19354	CGTCA-motif	CGTCA	5	MeJA-responsive
MSTRG.19354	ABRE	CACGTG	6	abscisic acid responsive
MSTRG.19354	ABRE	ACGTG	5	abscisic acid responsive
MSTRG.19354	TGA-element	AACGAC	6	auxin-responsive
MSTRG.19434	ABRE	ACGTG	5	abscisic acid responsive
MSTRG.19620	CGTCA-motif	CGTCA	5	MeJA-responsive
MSTRG.19620	TGACG-motif	TGACG	5	MeJA-responsive
MSTRG.19620	GARE-motif	TCTGTTG	7	gibberellin-responsive
MSTRG.19654	TGACG-motif	TGACG	5	MeJA-responsive
MSTRG.19654	TGACG-motif	TGACG	5	MeJA-responsive
MSTRG.19654	CGTCA-motif	CGTCA	5	MeJA-responsive
MSTRG.19654	CGTCA-motif	CGTCA	5	MeJA-responsive
MSTRG.19654	ABRE	ACGTG	5	abscisic acid responsive
MSTRG.19654	GARE-motif	TCTGTTG	7	gibberellin-responsive
MSTRG.20234	CGTCA-motif	CGTCA	5	MeJA-responsive
MSTRG.20234	CGTCA-motif	CGTCA	5	MeJA-responsive
MSTRG.20234	CGTCA-motif	CGTCA	5	MeJA-responsive
MSTRG.20234	CGTCA-motif	CGTCA	5	MeJA-responsive
MSTRG.20234	TGACG-motif	TGACG	5	MeJA-responsive
MSTRG.20234	TGACG-motif	TGACG	5	MeJA-responsive
MSTRG.20234	TGACG-motif	TGACG	5	MeJA-responsive
MSTRG.20234	TGACG-motif	TGACG	5	MeJA-responsive
MSTRG.20234	P-box	CCTTTTG	7	gibberellin-responsive
MSTRG.20234	ABRE	ACGTG	5	abscisic acid responsive
MSTRG.20234	ABRE	AACCCGG	7	abscisic acid responsive
MSTRG.20465	TCA-element	CCATCTTTTT	9	salicylic acid responsive
MSTRG.20601	TGA-element	AACGAC	6	auxin-responsive
MSTRG.20601	TGA-element	AACGAC	6	auxin-responsive
MSTRG.20701	CGTCA-motif	CGTCA	5	MeJA-responsive
MSTRG.20701	CGTCA-motif	CGTCA	5	MeJA-responsive
MSTRG.20701	TGACG-motif	TGACG	5	MeJA-responsive
MSTRG.20701	TGACG-motif	TGACG	5	MeJA-responsive
MSTRG.20701	ABRE	GACACGTGGC	9	abscisic acid responsive
MSTRG.20701	ABRE	CACGTG	6	abscisic acid responsive
MSTRG.20701	ABRE	ACGTG	5	abscisic acid responsive
MSTRG.20701	ABRE	TACGTGTC	8	abscisic acid responsive
MSTRG.20701	ABRE	ACGTG	5	abscisic acid responsive
MSTRG.20701	ABRE	GACACGTGGC	9	abscisic acid responsive
MSTRG.20701	ABRE	CACGTG	6	abscisic acid responsive
MSTRG.20701	ABRE	ACGTG	5	abscisic acid responsive
MSTRG.20821	CGTCA-motif	CGTCA	5	MeJA-responsive
MSTRG.20821	CGTCA-motif	CGTCA	5	MeJA-responsive
MSTRG.20821	CGTCA-motif	CGTCA	5	MeJA-responsive
MSTRG.20821	TATC-box	TATCCCA	7	gibberellin-responsive
MSTRG.20821	TGACG-motif	TGACG	5	MeJA-responsive
MSTRG.20821	TGACG-motif	TGACG	5	MeJA-responsive
MSTRG.20821	TGACG-motif	TGACG	5	MeJA-responsive
MSTRG.20850	ABRE	GACACGTACGT	10	abscisic acid responsive
MSTRG.20850	ABRE	ACGTG	5	abscisic acid responsive
MSTRG.20850	ABRE	ACGTG	5	abscisic acid responsive
MSTRG.20850	TCA-element	CCATCTTTTT	9	salicylic acid responsive
MSTRG.20850	CGTCA-motif	CGTCA	5	MeJA-responsive
MSTRG.20850	CGTCA-motif	CGTCA	5	MeJA-responsive
MSTRG.20850	TGACG-motif	TGACG	5	MeJA-responsive
MSTRG.20850	TGACG-motif	TGACG	5	MeJA-responsive
MSTRG.20960	P-box	CCTTTTG	7	gibberellin-responsive
MSTRG.20960	TGA-element	AACGAC	6	auxin-responsive
MSTRG.21010	TGACG-motif	TGACG	5	MeJA-responsive
MSTRG.21010	CGTCA-motif	CGTCA	5	MeJA-responsive
MSTRG.21010	TCA-element	TCAGAAGAGG	9	salicylic acid responsive
MSTRG.21269	ABRE	CACGTG	6	abscisic acid responsive
MSTRG.21269	ABRE	ACGTG	5	abscisic acid responsive
MSTRG.21269	ABRE	ACGTG	5	abscisic acid responsive
MSTRG.21269	ABRE	ACGTG	5	abscisic acid responsive
MSTRG.21269	ABRE	ACGTG	5	abscisic acid responsive
MSTRG.21269	TC-rich repeats	GTTTTCTTAC	9	defense and stress responsive
MSTRG.21269	TGACG-motif	TGACG	5	MeJA-responsive
MSTRG.21269	CGTCA-motif	CGTCA	5	MeJA-responsive
MSTRG.21269	AuxRR-core	GGTCCAT	7	auxin-responsive
MSTRG.21270	TC-rich repeats	ATTCTCTAAC	9	defense and stress responsive
MSTRG.21270	P-box	CCTTTTG	7	gibberellin-responsive
MSTRG.21270	TCA-element	CCATCTTTTT	9	salicylic acid responsive
MSTRG.21455	TC-rich repeats	ATTCTCTAAC	9	defense and stress responsive
MSTRG.21455	TC-rich repeats	ATTCTCTAAC	9	defense and stress responsive
MSTRG.21455	ABRE	ACGTG	5	abscisic acid responsive
MSTRG.21455	ABRE	ACGTG	5	abscisic acid responsive
MSTRG.21455	ABRE	ACGTG	5	abscisic acid responsive
MSTRG.21455	ABRE	TACGGTC	7	abscisic acid responsive
MSTRG.21455	P-box	CCTTTTG	7	gibberellin-responsive
MSTRG.21626	TGACG-motif	TGACG	5	MeJA-responsive
MSTRG.21626	TGACG-motif	TGACG	5	MeJA-responsive
MSTRG.21626	TGACG-motif	TGACG	5	MeJA-responsive
MSTRG.21626	TC-rich repeats	GTTTTCTTAC	9	defense and stress responsive
MSTRG.21626	CGTCA-motif	CGTCA	5	MeJA-responsive
MSTRG.21626	CGTCA-motif	CGTCA	5	MeJA-responsive
MSTRG.21626	CGTCA-motif	CGTCA	5	MeJA-responsive
MSTRG.21741	TGA-element	AACGAC	6	auxin-responsive
MSTRG.21741	CGTCA-motif	CGTCA	5	MeJA-responsive
MSTRG.21741	TGACG-motif	TGACG	5	MeJA-responsive
MSTRG.21741	P-box	CCTTTTG	7	gibberellin-responsive
MSTRG.21861	TC-rich repeats	GTTTTCTTAC	9	defense and stress responsive
MSTRG.21861	TC-rich repeats	GTTTTCTTAC	9	defense and stress responsive
MSTRG.21861	ABRE	AACCCGG	7	abscisic acid responsive
MSTRG.21861	ABRE	ACGTG	5	abscisic acid responsive
MSTRG.21861	ABRE	ACGTG	5	abscisic acid responsive
MSTRG.21861	AuxRR-core	GGTCCAT	7	auxin-responsive
MSTRG.22086	TCA-element	TCAGAAGAGG	9	salicylic acid responsive
MSTRG.22086	ABRE	ACGTG	5	abscisic acid responsive
MSTRG.22086	ABRE	ACGTG	5	abscisic acid responsive
MSTRG.22189	ABRE	ACGTG	5	abscisic acid responsive
MSTRG.22189	ABRE	ACGTG	5	abscisic acid responsive
MSTRG.22686	TATC-box	TATCCCA	7	gibberellin-responsive
MSTRG.22686	ABRE	CACGTG	6	abscisic acid responsive
MSTRG.22686	ABRE	ACGTG	5	abscisic acid responsive
MSTRG.22686	ABRE	ACGTG	5	abscisic acid responsive
MSTRG.22686	ABRE	ACGTG	5	abscisic acid responsive
MSTRG.22404	CGTCA-motif	CGTCA	5	MeJA-responsive
MSTRG.22404	CGTCA-motif	CGTCA	5	MeJA-responsive
MSTRG.22404	CGTCA-motif	CGTCA	5	MeJA-responsive
MSTRG.22404	TGACG-motif	TGACG	5	MeJA-responsive
MSTRG.22404	TGACG-motif	TGACG	5	MeJA-responsive
MSTRG.22404	TGACG-motif	TGACG	5	MeJA-responsive
MSTRG.23109	TC-rich repeats	ATTCTCTAAC	9	defense and stress responsive
MSTRG.23109	ABRE	ACGTG	5	abscisic acid responsive
MSTRG.23109	TGA-element	AACGAC	6	auxin-responsive
MSTRG.23109	TGA-element	AACGAC	6	auxin-responsive
MSTRG.23109	AuxRR-core	GGTCCAT	7	auxin-responsive
MSTRG.22414	CGTCA-motif	CGTCA	5	MeJA-responsive
MSTRG.22414	AuxRR-core	GGTCCAT	7	auxin-responsive
MSTRG.22414	TGACG-motif	TGACG	5	MeJA-responsive
MSTRG.22414	ABRE	ACGTG	5	abscisic acid responsive
MSTRG.22414	ABRE	ACGTG	5	abscisic acid responsive
MSTRG.22414	ABRE	ACGTG	5	abscisic acid responsive
MSTRG.23304	TC-rich repeats	GTTTTCTTAC	9	defense and stress responsive
MSTRG.23304	ABRE	ACGTG	5	abscisic acid responsive
MSTRG.23304	TCA-element	CCATCTTTTT	9	salicylic acid responsive
MSTRG.23343	TGACG-motif	TGACG	5	MeJA-responsive
MSTRG.23343	ABRE	ACGTG	5	abscisic acid responsive
MSTRG.23343	ABRE	CACGTG	6	abscisic acid responsive
MSTRG.23343	ABRE	ACGTG	5	abscisic acid responsive
MSTRG.23343	CGTCA-motif	CGTCA	5	MeJA-responsive
MSTRG.22439	TGA-element	AACGAC	6	auxin-responsive
MSTRG.22439	ABRE	ACGTG	5	abscisic acid responsive
MSTRG.22439	ABRE	ACGTG	5	abscisic acid responsive
MSTRG.23798	AuxRR-core	GGTCCAT	7	auxin-responsive
MSTRG.23798	TC-rich repeats	ATTCTCTAAC	9	defense and stress responsive
MSTRG.23800	ABRE	ACGTG	5	abscisic acid responsive
MSTRG.23800	TGA-element	AACGAC	6	auxin-responsive
MSTRG.23800	TCA-element	CCATCTTTTT	10	salicylic acid responsive
MSTRG.23801	TC-rich repeats	GTTTTCTTAC	9	defense and stress responsive
MSTRG.23801	TC-rich repeats	GTTTTCTTAC	9	defense and stress responsive
MSTRG.23801	ABRE	TACGGTC	7	abscisic acid responsive
MSTRG.23801	ABRE	ACGTG	5	abscisic acid responsive
MSTRG.23801	ABRE	ACGTG	5	abscisic acid responsive
MSTRG.23801	TGA-element	AACGAC	6	auxin-responsive
MSTRG.23801	TGACG-motif	TGACG	5	MeJA-responsive
MSTRG.23801	CGTCA-motif	CGTCA	5	MeJA-responsive
MSTRG.24025	CGTCA-motif	CGTCA	5	MeJA-responsive
MSTRG.24025	TGACG-motif	TGACG	5	MeJA-responsive
MSTRG.24025	ABRE	ACGTG	5	abscisic acid responsive
MSTRG.24025	ABRE	CGTACGTGCA	9	abscisic acid responsive
MSTRG.24025	ABRE	ACGTG	5	abscisic acid responsive
MSTRG.24270	CGTCA-motif	CGTCA	5	MeJA-responsive
MSTRG.24270	TGACG-motif	TGACG	5	MeJA-responsive
MSTRG.24270	TGA-element	AACGAC	6	auxin-responsive
MSTRG.24270	TC-rich repeats	GTTTTCTTAC	9	defense and stress responsive
MSTRG.23642	ABRE	ACGTG	5	abscisic acid responsive
MSTRG.23642	P-box	CCTTTTG	7	gibberellin-responsive
MSTRG.23642	TGA-element	AACGAC	6	auxin-responsive
MSTRG.24324	TGA-element	AACGAC	6	auxin-responsive
MSTRG.24324	CGTCA-motif	CGTCA	5	MeJA-responsive
MSTRG.24324	CGTCA-motif	CGTCA	5	MeJA-responsive
MSTRG.24324	CGTCA-motif	CGTCA	5	MeJA-responsive
MSTRG.24324	CGTCA-motif	CGTCA	5	MeJA-responsive
MSTRG.24324	CGTCA-motif	CGTCA	5	MeJA-responsive
MSTRG.24324	CGTCA-motif	CGTCA	5	MeJA-responsive
MSTRG.24324	CGTCA-motif	CGTCA	5	MeJA-responsive
MSTRG.24324	CGTCA-motif	CGTCA	5	MeJA-responsive
MSTRG.24324	CGTCA-motif	CGTCA	5	MeJA-responsive
MSTRG.24324	CGTCA-motif	CGTCA	5	MeJA-responsive
MSTRG.24324	CGTCA-motif	CGTCA	5	MeJA-responsive
MSTRG.24324	CGTCA-motif	CGTCA	5	MeJA-responsive
MSTRG.24324	CGTCA-motif	CGTCA	5	MeJA-responsive
MSTRG.24324	CGTCA-motif	CGTCA	5	MeJA-responsive
MSTRG.24324	ABRE	GACACGTGGC	9	abscisic acid responsive
MSTRG.24324	ABRE	ACGTG	5	abscisic acid responsive
MSTRG.24324	TGACG-motif	TGACG	5	MeJA-responsive
MSTRG.24324	TGACG-motif	TGACG	5	MeJA-responsive
MSTRG.24324	TGACG-motif	TGACG	5	MeJA-responsive
MSTRG.24324	TGACG-motif	TGACG	5	MeJA-responsive
MSTRG.24324	TGACG-motif	TGACG	5	MeJA-responsive
MSTRG.24324	TGACG-motif	TGACG	5	MeJA-responsive
MSTRG.24324	TGACG-motif	TGACG	5	MeJA-responsive
MSTRG.24324	TGACG-motif	TGACG	5	MeJA-responsive
MSTRG.24324	TGACG-motif	TGACG	5	MeJA-responsive
MSTRG.24324	TGACG-motif	TGACG	5	MeJA-responsive
MSTRG.24324	TGACG-motif	TGACG	5	MeJA-responsive
MSTRG.24324	TGACG-motif	TGACG	5	MeJA-responsive
MSTRG.24324	TGACG-motif	TGACG	5	MeJA-responsive
MSTRG.24324	TGACG-motif	TGACG	5	MeJA-responsive
MSTRG.24555	P-box	CCTTTTG	7	gibberellin-responsive
MSTRG.24555	P-box	CCTTTTG	7	gibberellin-responsive
MSTRG.24555	TGACG-motif	TGACG	5	MeJA-responsive
MSTRG.24555	TCA-element	CCATCTTTTT	9	salicylic acid responsive
MSTRG.24555	TCA-element	CCATCTTTTT	9	salicylic acid responsive
MSTRG.24555	CGTCA-motif	CGTCA	5	MeJA-responsive
MSTRG.24598	CGTCA-motif	CGTCA	5	MeJA-responsive
MSTRG.24598	TGACG-motif	TGACG	5	MeJA-responsive
