# Supplementary material for: Genome-Wide Identification of Powdery Mildew Responsive Long Non-Coding RNAs in Cucurbita pepo
Source: Front Genet. 2022 Jul 1;13:933022. doi: 10.3389/fgene.2022.933022 (PMC9283782; doi:10.3389/fgene.2022.933022)
Supplement: Supplementary file 5 [file Table11.XLSX]

## Sheet: Sheet1
Table S11 Enriched GO terms in PS
Type	ID	Description	Gene Ratio	Bg Ratio	Enrich_factor	P value
Biological Process	GO:0010200	response to chitin	0.0084	0.0031	2.7	2.22189e-05
Biological Process	GO:0030244	cellulose biosynthetic process	0.0074	0.0032	2.33	0.000496048
Biological Process	GO:0051171	regulation of nitrogen compound metabolic process	0.0478	0.0358	1.34	0.000864395
Biological Process	GO:0006559	L-phenylalanine catabolic process	0.0033	0.0009	3.62	0.000873066
Biological Process	GO:0060255	regulation of macromolecule metabolic process	0.0483	0.0366	1.32	0.00119774
Biological Process	GO:0019219	regulation of nucleobase-containing compound metabolic process	0.0367	0.0268	1.37	0.00153754
Biological Process	GO:1903506	regulation of nucleic acid-templated transcription	0.0358	0.0262	1.37	0.00196919
Biological Process	GO:2001141	regulation of RNA biosynthetic process	0.0358	0.0262	1.37	0.00196919
Biological Process	GO:0010556	regulation of macromolecule biosynthetic process	0.0376	0.0278	1.35	0.00204775
Biological Process	GO:0009889	regulation of biosynthetic process	0.0399	0.0299	1.34	0.00212174
Biological Process	GO:0031323	regulation of cellular metabolic process	0.0478	0.0368	1.3	0.00220772
Biological Process	GO:0031326	regulation of cellular biosynthetic process	0.0395	0.0295	1.34	0.00229218
Biological Process	GO:0080090	regulation of primary metabolic process	0.0478	0.0369	1.3	0.00237703
Biological Process	GO:0051252	regulation of RNA metabolic process	0.0386	0.0288	1.34	0.00246213
Biological Process	GO:0030433	ubiquitin-dependent ERAD pathway	0.006	0.0027	2.24	0.00254909
Biological Process	GO:0009800	cinnamic acid biosynthetic process	0.0023	0.0006	4.06	0.00255772
Biological Process	GO:0019222	regulation of metabolic process	0.0511	0.0399	1.28	0.00270203
Biological Process	GO:0090630	activation of GTPase activity	0.0051	0.0021	2.41	0.00278875
Biological Process	GO:0010344	seed oilbody biogenesis	0.0019	0.0004	4.55	0.00408916
Biological Process	GO:0006430	lysyl-tRNA aminoacylation	0.0014	0.0002	5.69	0.00542016
Biological Process	GO:0008272	sulfate transport	0.0014	0.0002	5.69	0.00542016
Biological Process	GO:0015709	thiosulfate transport	0.0014	0.0002	5.69	0.00542016
Biological Process	GO:0015729	oxaloacetate transport	0.0014	0.0002	5.69	0.00542016
Biological Process	GO:0036377	arbuscular mycorrhizal association	0.0014	0.0002	5.69	0.00542016
Biological Process	GO:0071422	succinate transmembrane transport	0.0014	0.0002	5.69	0.00542016
Biological Process	GO:1901698	response to nitrogen compound	0.0107	0.0063	1.7	0.00550773
Biological Process	GO:0051173	positive regulation of nitrogen compound metabolic process	0.0139	0.0088	1.58	0.0055179
Biological Process	GO:0009308	amine metabolic process	0.0028	0.0009	3.1	0.00603144
Biological Process	GO:0034314	Arp2/3 complex-mediated actin nucleation	0.0028	0.0009	3.1	0.00603144
Biological Process	GO:0045935	positive regulation of nucleobase-containing compound metabolic process	0.0111	0.0067	1.67	0.0061421
Biological Process	GO:2000112	regulation of cellular macromolecule biosynthetic process	0.0348	0.0265	1.31	0.00629579
Biological Process	GO:0010243	response to organonitrogen compound	0.0088	0.005	1.77	0.00681115
Biological Process	GO:0010468	regulation of gene expression	0.0418	0.0329	1.27	0.00765606
Biological Process	GO:0010604	positive regulation of macromolecule metabolic process	0.0144	0.0094	1.53	0.00775298
Biological Process	GO:0031328	positive regulation of cellular biosynthetic process	0.0116	0.0072	1.62	0.00790711
Biological Process	GO:0048522	positive regulation of cellular process	0.0214	0.0152	1.41	0.00821048
Biological Process	GO:0009891	positive regulation of biosynthetic process	0.0121	0.0076	1.59	0.0085574
Biological Process	GO:0031325	positive regulation of cellular metabolic process	0.0139	0.0091	1.52	0.00956738
Biological Process	GO:0050794	regulation of cellular process	0.0711	0.0601	1.18	0.0114151
Biological Process	GO:0010628	positive regulation of gene expression	0.0111	0.007	1.59	0.0114965
Biological Process	GO:0010411	xyloglucan metabolic process	0.0056	0.0029	1.95	0.0130829
Biological Process	GO:0010557	positive regulation of macromolecule biosynthetic process	0.0111	0.0071	1.57	0.0132997
Biological Process	GO:0051254	positive regulation of RNA metabolic process	0.0102	0.0064	1.61	0.0133228
Biological Process	GO:0031338	regulation of vesicle fusion	0.0033	0.0013	2.49	0.0133864
Biological Process	GO:0009893	positive regulation of metabolic process	0.0149	0.0101	1.47	0.0133958
Biological Process	GO:0010087	phloem or xylem histogenesis	0.0037	0.0016	2.28	0.0153168
Biological Process	GO:0006082	organic acid metabolic process	0.006	0.0033	1.85	0.0160843
Biological Process	GO:0043436	oxoacid metabolic process	0.006	0.0033	1.85	0.0160843
Biological Process	GO:0071555	cell wall organization	0.02	0.0147	1.36	0.0187085
Biological Process	GO:0000070	mitotic sister chromatid segregation	0.0014	0.0003	4.27	0.0188265
Biological Process	GO:0048586	regulation of long-day photoperiodism, flowering	0.0014	0.0003	4.27	0.0188265
Biological Process	GO:0071423	malate transmembrane transport	0.0014	0.0003	4.27	0.0188265
Biological Process	GO:0120009	intermembrane lipid transfer	0.0014	0.0003	4.27	0.0188265
Biological Process	GO:0006751	glutathione catabolic process	0.0023	0.0008	2.85	0.0192535
Biological Process	GO:0010876	lipid localization	0.0023	0.0008	2.85	0.0192535
Biological Process	GO:0045787	positive regulation of cell cycle	0.0023	0.0008	2.85	0.0192535
Biological Process	GO:1902680	positive regulation of RNA biosynthetic process	0.0098	0.0062	1.57	0.0193545
Biological Process	GO:1903508	positive regulation of nucleic acid-templated transcription	0.0098	0.0062	1.57	0.0193545
Biological Process	GO:0048268	clathrin coat assembly	0.0033	0.0014	2.34	0.019367
Biological Process	GO:0006974	cellular response to DNA damage stimulus	0.0074	0.0044	1.69	0.0202558
Biological Process	GO:0007017	microtubule-based process	0.0093	0.0059	1.58	0.0209101
Biological Process	GO:0030970	retrograde protein transport, ER to cytosol	0.0019	0.0006	3.25	0.021223
Biological Process	GO:0034620	cellular response to unfolded protein	0.0019	0.0006	3.25	0.021223
Biological Process	GO:0045931	positive regulation of mitotic cell cycle	0.0019	0.0006	3.25	0.021223
Biological Process	GO:0090150	establishment of protein localization to membrane	0.0019	0.0006	3.25	0.021223
Biological Process	GO:0090316	positive regulation of intracellular protein transport	0.0019	0.0006	3.25	0.021223
Biological Process	GO:0006352	DNA-templated transcription, initiation	0.0042	0.002	2.05	0.0216924
Biological Process	GO:0019760	glucosinolate metabolic process	0.0028	0.0011	2.44	0.0243548
Biological Process	GO:0050789	regulation of biological process	0.0766	0.0668	1.15	0.0266391
Biological Process	GO:0065007	biological regulation	0.0808	0.0708	1.14	0.0275536
Biological Process	GO:0006098	pentose-phosphate shunt	0.0037	0.0018	2.07	0.0280556
Biological Process	GO:0061024	membrane organization	0.0042	0.0021	1.97	0.0281372
Biological Process	GO:0009753	response to jasmonic acid	0.006	0.0035	1.72	0.0293493
Biological Process	GO:0006342	chromatin silencing	0.0023	0.0009	2.59	0.030272
Biological Process	GO:0006900	vesicle budding from membrane	0.0023	0.0009	2.59	0.030272
Biological Process	GO:0009292	genetic transfer	0.0023	0.0009	2.59	0.030272
Biological Process	GO:0009294	DNA mediated transformation	0.0023	0.0009	2.59	0.030272
Biological Process	GO:0010218	response to far red light	0.0023	0.0009	2.59	0.030272
Biological Process	GO:0016143	S-glycoside metabolic process	0.0023	0.0009	2.59	0.030272
Biological Process	GO:0019757	glycosinolate metabolic process	0.0023	0.0009	2.59	0.030272
Biological Process	GO:0044764	multi-organism cellular process	0.0023	0.0009	2.59	0.030272
Biological Process	GO:0006273	lagging strand elongation	0.0009	0.0002	5.69	0.0308679
Biological Process	GO:0009683	indoleacetic acid metabolic process	0.0009	0.0002	5.69	0.0308679
Biological Process	GO:0009684	indoleacetic acid biosynthetic process	0.0009	0.0002	5.69	0.0308679
Biological Process	GO:0009827	plant-type cell wall modification	0.0009	0.0002	5.69	0.0308679
Biological Process	GO:0009961	response to 1-aminocyclopropane-1-carboxylic acid	0.0009	0.0002	5.69	0.0308679
Biological Process	GO:0010265	SCF complex assembly	0.0009	0.0002	5.69	0.0308679
Biological Process	GO:0010358	leaf shaping	0.0009	0.0002	5.69	0.0308679
Biological Process	GO:0035065	regulation of histone acetylation	0.0009	0.0002	5.69	0.0308679
Biological Process	GO:0043461	proton-transporting ATP synthase complex assembly	0.0009	0.0002	5.69	0.0308679
Biological Process	GO:0048479	style development	0.0009	0.0002	5.69	0.0308679
Biological Process	GO:0048576	positive regulation of short-day photoperiodism, flowering	0.0009	0.0002	5.69	0.0308679
Biological Process	GO:0052837	thiazole biosynthetic process	0.0009	0.0002	5.69	0.0308679
Biological Process	GO:0042752	regulation of circadian rhythm	0.0028	0.0012	2.28	0.034689
Biological Process	GO:0071712	ER-associated misfolded protein catabolic process	0.0028	0.0012	2.28	0.034689
Biological Process	GO:0009644	response to high light intensity	0.0042	0.0022	1.9	0.0358138
Biological Process	GO:0032482	Rab protein signal transduction	0.0042	0.0022	1.9	0.0358138
Biological Process	GO:0009751	response to salicylic acid	0.0033	0.0016	2.1	0.0364155
Biological Process	GO:0006778	porphyrin-containing compound metabolic process	0.0019	0.0007	2.85	0.0366126
Biological Process	GO:0015994	chlorophyll metabolic process	0.0019	0.0007	2.85	0.0366126
Biological Process	GO:0034754	cellular hormone metabolic process	0.0019	0.0007	2.85	0.0366126
Biological Process	GO:0035435	phosphate ion transmembrane transport	0.0019	0.0007	2.85	0.0366126
Biological Process	GO:0050826	response to freezing	0.0019	0.0007	2.85	0.0366126
Biological Process	GO:0033043	regulation of organelle organization	0.0074	0.0047	1.57	0.038577
Biological Process	GO:0006418	tRNA aminoacylation for protein translation	0.0014	0.0004	3.41	0.0409326
Biological Process	GO:0006851	mitochondrial calcium ion transmembrane transport	0.0014	0.0004	3.41	0.0409326
Biological Process	GO:0009228	thiamine biosynthetic process	0.0014	0.0004	3.41	0.0409326
Biological Process	GO:0031119	tRNA pseudouridine synthesis	0.0014	0.0004	3.41	0.0409326
Biological Process	GO:0051228	mitotic spindle disassembly	0.0014	0.0004	3.41	0.0409326
Biological Process	GO:0097352	autophagosome maturation	0.0014	0.0004	3.41	0.0409326
Biological Process	GO:0071705	nitrogen compound transport	0.0079	0.0051	1.54	0.0409961
Biological Process	GO:0042546	cell wall biogenesis	0.007	0.0044	1.58	0.041845
Biological Process	GO:0009739	response to gibberellin	0.0046	0.0026	1.78	0.0425514
Biological Process	GO:0071702	organic substance transport	0.0084	0.0056	1.51	0.0431337
Biological Process	GO:0048518	positive regulation of biological process	0.0255	0.0205	1.25	0.0436001
Biological Process	GO:0006066	alcohol metabolic process	0.0023	0.001	2.37	0.0445483
Biological Process	GO:0009873	ethylene-activated signaling pathway	0.0023	0.001	2.37	0.0445483
Biological Process	GO:0010167	response to nitrate	0.0023	0.001	2.37	0.0445483
Biological Process	GO:0040034	regulation of development, heterochronic	0.0023	0.001	2.37	0.0445483
Biological Process	GO:0045184	establishment of protein localization	0.0074	0.0048	1.54	0.0445968
Biological Process	GO:0051726	regulation of cell cycle	0.0056	0.0033	1.67	0.0449771
Biological Process	GO:0009793	embryo development ending in seed dormancy	0.0107	0.0075	1.42	0.0452513
Biological Process	GO:0009231	riboflavin biosynthetic process	0.0028	0.0013	2.13	0.0474705
Biological Process	GO:0006950	response to stress	0.0386	0.0325	1.19	0.0485126
Biological Process	GO:0018130	heterocycle biosynthetic process	0.0084	0.0056	1.48	0.0491165
Biological Process	GO:0009314	response to radiation	0.0135	0.01	1.35	0.0495892
Cellular Component	GO:0005669	transcription factor TFIID complex	0.0035	0.0012	3.02	0.000956638
Cellular Component	GO:0005886	plasma membrane	0.0763	0.0641	1.19	0.00355297
Cellular Component	GO:0005885	Arp2/3 protein complex	0.0023	0.0008	3.12	0.00592539
Cellular Component	GO:0005634	nucleus	0.2512	0.2326	1.08	0.00805832
Cellular Component	GO:0012511	monolayer-surrounded lipid storage body	0.0023	0.0008	2.86	0.0101098
Cellular Component	GO:0034098	VCP-NPL4-UFD1 AAA ATPase complex	0.0016	0.0004	3.81	0.0104222
Cellular Component	GO:0071818	BAT3 complex	0.0019	0.0006	3.17	0.0110677
Cellular Component	GO:0043189	H4/H2A histone acetyltransferase complex	0.0012	0.0003	4.28	0.0186386
Cellular Component	GO:0030136	clathrin-coated vesicle	0.0027	0.0012	2.22	0.0265171
Cellular Component	GO:0030124	AP-4 adaptor complex	0.0008	0.0001	5.71	0.0306498
Cellular Component	GO:0043186	P granule	0.0008	0.0001	5.71	0.0306498
Cellular Component	GO:0005658	alpha DNA polymerase:primase complex	0.0012	0.0003	3.43	0.0405443
Cellular Component	GO:0005956	protein kinase CK2 complex	0.0012	0.0003	3.43	0.0405443
Cellular Component	GO:0000124	SAGA complex	0.0023	0.0011	2.14	0.0467618
Molecular Function	GO:0016760	cellulose synthase (UDP-forming) activity	0.0044	0.0017	2.63	0.000252206
Molecular Function	GO:0031593	polyubiquitin modification-dependent protein binding	0.0038	0.0013	2.81	0.000313653
Molecular Function	GO:0016762	xyloglucan:xyloglucosyl transferase activity	0.005	0.0023	2.2	0.00108567
Molecular Function	GO:0003700	transcription factor activity, sequence-specific DNA binding	0.0653	0.0547	1.19	0.00258363
Molecular Function	GO:0045548	phenylalanine ammonia-lyase activity	0.0016	0.0004	4.02	0.00269516
Molecular Function	GO:0008131	primary amine oxidase activity	0.0013	0.0003	4.5	0.00426849
Molecular Function	GO:0005200	structural constituent of cytoskeleton	0.0038	0.0017	2.18	0.00482147
Molecular Function	GO:0003972	RNA ligase (ATP) activity	0.0009	0.0002	5.63	0.00560439
Molecular Function	GO:0004824	lysine-tRNA ligase activity	0.0009	0.0002	5.63	0.00560439
Molecular Function	GO:0015116	sulfate transmembrane transporter activity	0.0009	0.0002	5.63	0.00560439
Molecular Function	GO:0015117	thiosulfate transmembrane transporter activity	0.0009	0.0002	5.63	0.00560439
Molecular Function	GO:0015131	oxaloacetate transmembrane transporter activity	0.0009	0.0002	5.63	0.00560439
Molecular Function	GO:0015141	succinate transmembrane transporter activity	0.0009	0.0002	5.63	0.00560439
Molecular Function	GO:0035243	protein-arginine omega-N symmetric methyltransferase activity	0.0009	0.0002	5.63	0.00560439
Molecular Function	GO:0048038	quinone binding	0.0022	0.0008	2.81	0.00592833
Molecular Function	GO:0017137	Rab GTPase binding	0.0041	0.002	2.03	0.00676642
Molecular Function	GO:0004724	magnesium-dependent protein serine/threonine phosphatase activity	0.0041	0.0021	1.93	0.0112012
Molecular Function	GO:0016853	isomerase activity	0.0047	0.0027	1.76	0.0163502
Molecular Function	GO:0003935	GTP cyclohydrolase II activity	0.0009	0.0002	4.22	0.0194326
Molecular Function	GO:0004566	beta-glucuronidase activity	0.0009	0.0002	4.22	0.0194326
Molecular Function	GO:0008184	glycogen phosphorylase activity	0.0009	0.0002	4.22	0.0194326
Molecular Function	GO:0008686	3,4-dihydroxy-2-butanone-4-phosphate synthase activity	0.0009	0.0002	4.22	0.0194326
Molecular Function	GO:0015140	malate transmembrane transporter activity	0.0009	0.0002	4.22	0.0194326
Molecular Function	GO:0051753	mannan synthase activity	0.0009	0.0002	4.22	0.0194326
Molecular Function	GO:0102499	SHG alpha-glucan phosphorylase activity	0.0009	0.0002	4.22	0.0194326
Molecular Function	GO:0017057	6-phosphogluconolactonase activity	0.0013	0.0004	3.22	0.0220723
Molecular Function	GO:0019784	NEDD8-specific protease activity	0.0013	0.0004	3.22	0.0220723
Molecular Function	GO:0004499	N,N-dimethylaniline monooxygenase activity	0.0025	0.0012	2.14	0.0224007
Molecular Function	GO:0016308	1-phosphatidylinositol-4-phosphate 5-kinase activity	0.0019	0.0008	2.41	0.0256514
Molecular Function	GO:0051787	misfolded protein binding	0.0019	0.0008	2.41	0.0256514
Molecular Function	GO:0003677	DNA binding	0.0927	0.0839	1.1	0.0277544
Molecular Function	GO:0005545	1-phosphatidylinositol binding	0.0022	0.001	2.19	0.0285719
Molecular Function	GO:0009055	electron carrier activity	0.0132	0.01	1.32	0.0315214
Molecular Function	GO:0000285	1-phosphatidylinositol-3-phosphate 5-kinase activity	0.0006	0.0001	5.63	0.0315596
Molecular Function	GO:0003879	ATP phosphoribosyltransferase activity	0.0006	0.0001	5.63	0.0315596
Molecular Function	GO:0004040	amidase activity	0.0006	0.0001	5.63	0.0315596
Molecular Function	GO:0004090	carbonyl reductase (NADPH) activity	0.0006	0.0001	5.63	0.0315596
Molecular Function	GO:0004750	ribulose-phosphate 3-epimerase activity	0.0006	0.0001	5.63	0.0315596
Molecular Function	GO:0005245	voltage-gated calcium channel activity	0.0006	0.0001	5.63	0.0315596
Molecular Function	GO:0005267	potassium channel activity	0.0006	0.0001	5.63	0.0315596
Molecular Function	GO:0008429	phosphatidylethanolamine binding	0.0006	0.0001	5.63	0.0315596
Molecular Function	GO:0043864	indoleacetamide hydrolase activity	0.0006	0.0001	5.63	0.0315596
Molecular Function	GO:0051752	phosphoglucan, water dikinase activity	0.0006	0.0001	5.63	0.0315596
Molecular Function	GO:0052906	tRNA (guanine(37)-N(1))-methyltransferase activity	0.0006	0.0001	5.63	0.0315596
Molecular Function	GO:0016860	intramolecular oxidoreductase activity	0.0016	0.0006	2.56	0.0316562
Molecular Function	GO:0016864	intramolecular oxidoreductase activity, transposing S-S bonds	0.0016	0.0006	2.56	0.0316562
Molecular Function	GO:0004402	histone acetyltransferase activity	0.0019	0.0008	2.25	0.0364665
Molecular Function	GO:0016799	hydrolase activity, hydrolyzing N-glycosyl compounds	0.0013	0.0004	2.81	0.0380096
Molecular Function	GO:0043023	ribosomal large subunit binding	0.0013	0.0004	2.81	0.0380096
Molecular Function	GO:0005507	copper ion binding	0.0054	0.0035	1.54	0.0391679
Molecular Function	GO:0003839	gamma-glutamylcyclotransferase activity	0.0009	0.0003	3.38	0.0421788
Molecular Function	GO:0015035	protein disulfide oxidoreductase activity	0.0079	0.0056	1.41	0.0429315
Molecular Function	GO:0004471	malate dehydrogenase (decarboxylating) (NAD+) activity	0.0016	0.0007	2.35	0.0465001
Molecular Function	GO:0005199	structural constituent of cell wall	0.0016	0.0007	2.35	0.0465001
Molecular Function	GO:0017016	Ras GTPase binding	0.0025	0.0013	1.88	0.0494682
Molecular Function	GO:0031267	small GTPase binding	0.0025	0.0013	1.88	0.0494682
