# Supplementary material for: Genome-Wide Identification of Powdery Mildew Responsive Long Non-Coding RNAs in Cucurbita pepo
Source: Front Genet. 2022 Jul 1;13:933022. doi: 10.3389/fgene.2022.933022 (PMC9283782; doi:10.3389/fgene.2022.933022)
Supplement: Supplementary file 6 [file Table4.XLSX]

## Sheet: Sheet1
Table S4 PM-responsive lncRNAs in PS
lncRNA_id	PS_0 hpi_FPKM (average)	PS_24 hpi_FPKM (average)	log2FC(24 hpi/0 hpi)	p-value	FDR	UP/DOWN regulate
MSTRG.22591.3	0.31886	2.64262	2.87843	2.34101e-12	3.51702e-09	UP
MSTRG.16628.10	0.778201	0.0111627	-4.23767	1.56281e-07	0.000117234	DOWN
MSTRG.5438.8	1.21871	0.204472	-2.39671	6.46152e-07	0.000323646	DOWN
MSTRG.17165.3	0	0.632469	4.48779	1.1997e-06	0.0004509	UP
MSTRG.11287.1	0.839173	2.52281	1.52934	1.58106e-06	0.000474948	UP
MSTRG.29105.2	1.09122	0	-4.25338	7.32103e-06	0.00172845	DOWN
MSTRG.28570.4	0	0.759028	4.21504	8.04698e-06	0.00172845	UP
MSTRG.4041.5	0.0156457	0.452567	3.60268	1.1598e-05	0.00217935	UP
MSTRG.23304.9	1.12411	0.125068	-2.74183	1.6232e-05	0.00263025	DOWN
MSTRG.11447.4	0.398339	0	-4.09781	1.74692e-05	0.00263025	DOWN
MSTRG.16965.2	3.96234	1.29858	-1.5665	2.61958e-05	0.00328513	DOWN
MSTRG.1796.3	0.00546367	0.850074	3.84613	2.64244e-05	0.00328513	UP
MSTRG.12173.1	1.04039	0.0895683	-3.00995	2.95647e-05	0.00328513	DOWN
MSTRG.27589.2	0	30.145	4.18718	3.06171e-05	0.00328513	UP
MSTRG.10990.1	0.491942	0	-3.85639	5.9854e-05	0.00600198	DOWN
MSTRG.24598.1	0.877839	4.46948	2.1688	8.37212e-05	0.00786257	UP
MSTRG.17932.18	0.798349	0.0162547	-3.62043	9.53459e-05	0.00810687	DOWN
MSTRG.27883.1	0.0455317	0.854365	3.1288	9.83654e-05	0.00810687	UP
MSTRG.16965.1	3.2364	1.00652	-1.61633	0.000102482	0.00810687	DOWN
MSTRG.12138.2	0.21145	0	-3.69169	0.000130878	0.00956473	DOWN
MSTRG.12770.2	0.475805	0	-3.7198	0.000133639	0.00956473	DOWN
MSTRG.16628.19	2.086	0.0914683	-3.30096	0.000149146	0.0100737	DOWN
MSTRG.23799.1	0.575261	0.066546	-2.63719	0.000154155	0.0100737	DOWN
MSTRG.24270.4	0.593495	0	-3.64572	0.000190728	0.0119443	DOWN
MSTRG.3470.9	1.56193	0.460906	-1.67603	0.000294486	0.0176212	DOWN
MSTRG.15726.1	0.0887817	1.29458	2.94152	0.000304824	0.0176212	UP
MSTRG.23801.1	0.193021	0	-3.45113	0.000423613	0.0235811	DOWN
MSTRG.13273.1	0	0.284756	3.44764	0.000449541	0.0241307	UP
MSTRG.25475.41	0.207223	0	-3.32583	0.000931102	0.0482568	DOWN
MSTRG.22219.11	1.67752	0.354006	-1.96965	0.00105761	0.0529863	DOWN
MSTRG.14966.4	0.502012	1.86789	1.72849	0.00147674	0.0715979	UP
MSTRG.944.1	0.207415	0.880046	1.83664	0.00171458	0.0805318	UP
MSTRG.6504.7	0.220775	2.21046	2.61477	0.00185222	0.0842423	UP
MSTRG.23798.1	0.175973	0	-3.09247	0.00190568	0.0842423	DOWN
MSTRG.5570.12	1.9264	0.147058	-2.75321	0.00199068	0.0854855	DOWN
MSTRG.15616.2	12.581	4.20659	-1.49797	0.00251731	0.105098	DOWN
MSTRG.26421.1	0	0.235206	2.99547	0.00275679	0.109257	UP
MSTRG.15659.1	27.8795	5.76762	-2.02802	0.00276233	0.109257	DOWN
MSTRG.11916.1	0	0.443833	2.98209	0.00290673	0.112021	UP
MSTRG.14071.7	0.35532	0	-2.98276	0.00305152	0.114661	DOWN
MSTRG.479.1	1.53398	6.85983	1.88133	0.00339084	0.124303	UP
MSTRG.3973.3	0.534468	0.0699073	-2.32015	0.00419067	0.149966	DOWN
MSTRG.17392.1	0	0.261941	2.87583	0.00434145	0.151749	UP
MSTRG.11813.1	0	0.184581	2.87279	0.00445078	0.152034	UP
MSTRG.4776.1	1.58615	0.258102	-2.15147	0.00500997	0.167333	DOWN
MSTRG.9635.6	1.01644	0.232538	-1.85465	0.00544556	0.177928	DOWN
MSTRG.851.1	0.144334	0.915182	2.08729	0.00574596	0.183748	UP
MSTRG.20821.1	0.397671	0.014158	-2.6108	0.00591961	0.185358	DOWN
MSTRG.28024.2	0.147752	1.95324	2.39085	0.00652216	0.200057	UP
MSTRG.22326.15	0.298979	0	-2.74246	0.00680085	0.201	DOWN
MSTRG.19434.1	0.580984	0.043185	-2.54176	0.00682036	0.201	DOWN
MSTRG.16643.6	0.0881473	0.699554	2.21602	0.00738236	0.213378	UP
MSTRG.21270.1	1.19414	0.299737	-1.75823	0.00821954	0.233094	DOWN
MSTRG.2074.1	0.0828663	0.493958	1.9427	0.00916173	0.255002	UP
MSTRG.10173.43	0.145274	1.08126	2.12797	0.00951778	0.260095	UP
MSTRG.8419.4	0.753069	0.0597077	-2.38939	0.0102809	0.275931	DOWN
MSTRG.23343.1	0	0.377576	2.58748	0.0108508	0.280659	UP
MSTRG.31023.1	0.160082	0.473401	1.41352	0.0109268	0.280659	UP
MSTRG.14858.1	0.61777	0.0317363	-2.39572	0.0110172	0.280659	DOWN
MSTRG.15212.1	13.8581	3.71327	-1.64318	0.0123169	0.308538	DOWN
MSTRG.16829.6	0.993842	0.441904	-1.11551	0.0127438	0.313999	DOWN
MSTRG.19216.1	0.256616	0.879883	1.54038	0.0134475	0.322493	UP
MSTRG.20850.6	0.218535	0	-2.51996	0.0135177	0.322493	DOWN
MSTRG.22086.6	0	0.0747723	2.49949	0.0144975	0.331902	UP
MSTRG.14413.10	0.257673	0.952764	1.57504	0.0145265	0.331902	UP
MSTRG.1028.4	0.569635	1.3427	1.15877	0.0145746	0.331902	UP
MSTRG.15204.1	0.519237	0.0753287	-2.00532	0.0153839	0.338208	DOWN
MSTRG.15207.3	0.205278	0.719575	1.51285	0.0155169	0.338208	UP
MSTRG.27437.11	0.000313333	0.458457	2.36842	0.0155265	0.338208	UP
MSTRG.24036.1	0.038353	0.993344	2.32849	0.0161896	0.34089	UP
MSTRG.2226.1	0.0419907	0.585527	2.32839	0.0162427	0.34089	UP
MSTRG.688.1	0.131677	0.689309	1.79343	0.0163378	0.34089	UP
MSTRG.22686.1	0	0.334417	2.42847	0.0173892	0.347111	UP
MSTRG.21626.1	0.321533	0	-2.42509	0.0175317	0.347111	DOWN
MSTRG.11047.1	1.26919	0.379516	-1.50723	0.0176257	0.347111	DOWN
MSTRG.792.1	0.448968	0.020404	-2.34004	0.0179906	0.347111	DOWN
MSTRG.24555.1	0.366105	0.0220763	-2.16506	0.0181039	0.347111	DOWN
MSTRG.6636.14	0.134272	0.972308	1.91529	0.0182447	0.347111	UP
MSTRG.21269.5	0.354015	0.00622433	-2.40752	0.0185538	0.347774	DOWN
MSTRG.22259.7	1.22551	0.510185	-1.19634	0.0187423	0.347774	DOWN
MSTRG.24025.1	0.699873	0.0339217	-2.26575	0.019737	0.359591	DOWN
MSTRG.24747.2	0.830169	0.377591	-1.07391	0.0198576	0.359591	DOWN
MSTRG.20465.1	0.05261	0.627627	2.19513	0.0206887	0.37018	UP
MSTRG.21741.3	0.100112	0	-2.34735	0.0217277	0.384197	DOWN
MSTRG.19424.28	0.121563	0.003411	-2.22416	0.0227229	0.397122	DOWN
MSTRG.4638.1	0.00666633	0.327543	2.27662	0.0233349	0.398616	UP
MSTRG.30281.5	0.333392	1.18067	1.47461	0.0233388	0.398616	UP
MSTRG.29422.1	0.789586	0.280032	-1.30399	0.0246929	0.412508	DOWN
MSTRG.2227.1	0.0743597	0.52566	1.97009	0.0247011	0.412508	UP
MSTRG.28006.1	0.314891	0	-2.26751	0.0266262	0.439771	DOWN
MSTRG.6574.10	0.00781267	0.35895	2.22934	0.0269409	0.440132	UP
MSTRG.10461.5	0.251803	0.000484667	-2.24047	0.0284076	0.459103	DOWN
MSTRG.2101.1	0.101861	0.605611	1.89068	0.0300063	0.479781	UP
MSTRG.773.1	0.304238	0	-2.20051	0.0314683	0.496551	DOWN
MSTRG.24989.1	0.0330093	0.442979	2.1062	0.0318702	0.496551	UP
MSTRG.26968.3	0.02281	0.303234	2.06758	0.0324801	0.496551	UP
MSTRG.29656.1	0.307174	0.008229	-2.16086	0.0330293	0.496551	DOWN
MSTRG.18234.1	0.164845	0.458139	1.25082	0.033584	0.496551	UP
MSTRG.22414.1	0.531121	0.0862697	-1.77924	0.0336066	0.496551	DOWN
MSTRG.27437.12	0.390986	0.0431687	-2.07013	0.0336784	0.496551	DOWN
MSTRG.13653.8	1.06602	0.381574	-1.35138	0.0336981	0.496551	DOWN
MSTRG.19620.4	0.163176	1.35106	1.97061	0.0341973	0.499016	UP
MSTRG.643.6	0.182225	0.513817	1.22409	0.0347379	0.50203	UP
MSTRG.13871.14	0.631957	3.11779	1.79001	0.0352096	0.504	UP
MSTRG.16371.1	0.282223	0.695474	1.1469	0.035564	0.50427	UP
MSTRG.7190.2	0.500809	0.173828	-1.28038	0.0362936	0.506563	DOWN
MSTRG.6549.2	0.268546	0.771835	1.35919	0.0363997	0.506563	UP
MSTRG.5488.2	0.650329	0.230118	-1.30251	0.0380289	0.52438	DOWN
MSTRG.20701.8	2.05025	0.862826	-1.13964	0.039494	0.53477	DOWN
MSTRG.5817.3	0.147785	0.00432333	-2.01669	0.040993	0.550111	DOWN
MSTRG.27083.4	0.00526233	0.0743873	1.95793	0.0414549	0.550609	UP
MSTRG.27588.13	0.523585	0.142712	-1.46939	0.0475327	0.614235	DOWN
MSTRG.16628.4	2.52164	0.48504	-1.76337	0.0478147	0.614235	DOWN
