# Supplementary material for: Genome-Wide Identification of Powdery Mildew Responsive Long Non-Coding RNAs in Cucurbita pepo
Source: Front Genet. 2022 Jul 1;13:933022. doi: 10.3389/fgene.2022.933022 (PMC9283782; doi:10.3389/fgene.2022.933022)
Supplement: Supplementary file 7 [file Table1.XLSX]

## Sheet: Sheet1
Table S1 Primers used for real-time quantitative PCR
Primer name	Primer sequences ( 5' to 3' )
MSTRG.20701.8-Forward	TGATCCAGTTCGTCGGAATCC
MSTRG.20701.8-Reverse	GAATCAGCTTAGAGGCGGAATAC
MSTRG.24598.1-Forward	TTCCACCTCTAATGTCCATGGC
MSTRG.24598.1-Reverse	TGAGGCCAGTAAAGCTAACGG
MSTRG.3470.9-Forward	TTGTCTCGTCTTCCATTGCG
MSTRG.3470.9-Rverse	CTTGGTTGTCATCTCTCTGCAC
MSTRG.23642.9-Forward	TTGTGGAAGTAGCGTAAGACG
MSTRG.23642.9-Reverse	GGCGGGCATTAAAGGATAGTATG
MSTRG.4086.3-Forward	ATCACACCTGCTCATGCTTC
MSTRG.4086.3-Reverse	TGGCTTGAAGTTGGTTCTCC
MSTRG.24797.4-Forward	GGCCAAATGACAGTTCAACGAG
MSTRG.24797.4-Reverse	ATGCCCCTCAAATTCACAGG
MSTRG.15659.1-Forward	TATTTCACCAGCGTGCTACCG
MSTRG.15659.1-Reverse	TCGATCCTCTTCCAGGCAAAAAG
MSTRG.5438.8-Forward	AGCACAAGGTCACAAGCTTC
MSTRG.5438.8-Reverse	GCCACCAACAAAAGGAGAAGTG
