# Supplementary material for: Genome-Wide Identification of Powdery Mildew Responsive Long Non-Coding RNAs in Cucurbita pepo
Source: Front Genet. 2022 Jul 1;13:933022. doi: 10.3389/fgene.2022.933022 (PMC9283782; doi:10.3389/fgene.2022.933022)
Supplement: Supplementary file 8 [file Table10.XLSX]

## Sheet: Sheet1
Table S10 The potential target genes of PM-responsive lncRNAs
lncRNA_id	Trans_target_gene	Target_type	NR_annotation
MSTRG.10000.4	Cp4.1LG07g00810	trans	probable inactive purple acid phosphatase 1 isoform X1 [Cucurbita pepo subsp. pepo]
MSTRG.10000.4	Cp4.1LG20g08040	trans	uncharacterized protein LOC111783056 isoform X1 [Cucurbita pepo subsp. pepo]
MSTRG.10000.4	Cp4.1LG20g02080	trans	pentatricopeptide repeat-containing protein At1g74900, mitochondrial [Cucurbita pepo subsp. pepo]
MSTRG.10000.4	Cp4.1LG04g08510	cis	sodium/hydrogen exchanger 2-like [Cucurbita pepo subsp. pepo]
MSTRG.10000.4	Cp4.1LG01g23740	trans	transcription initiation factor TFIID subunit 7 [Cucurbita pepo subsp. pepo]
MSTRG.10000.4	Cp4.1LG05g06100	trans	probable inactive receptor kinase At4g23740 [Cucurbita pepo subsp. pepo]
MSTRG.10000.4	Cp4.1LG12g05190	trans	protein SLOW WALKER 1-like [Cucurbita pepo subsp. pepo]
MSTRG.10000.4	Cp4.1LG12g05750	trans	blue-light photoreceptor PHR2-like isoform X1 [Cucurbita pepo subsp. pepo]
MSTRG.10000.4	Cp4.1LG04g08530	cis	uncharacterized protein LOC111792737 isoform X1 [Cucurbita pepo subsp. pepo]
MSTRG.10000.4	Cp4.1LG04g08570	cis	microtubule-associated protein 70-1-like [Cucurbita moschata]
MSTRG.10000.4	Cp4.1LG04g08560	cis	kinesin-like protein KIN-14F isoform X2 [Cucurbita pepo subsp. pepo]
MSTRG.10000.4	Cp4.1LG07g04360	trans	uncharacterized protein LOC111798186 [Cucurbita pepo subsp. pepo]
MSTRG.10000.4	Cp4.1LG06g08570	trans	ABC transporter C family member 3-like [Cucurbita pepo subsp. pepo]
MSTRG.10000.4	Cp4.1LG16g04770	trans	indole-3-acetic acid-amido synthetase GH3.10 [Cucurbita pepo subsp. pepo]
MSTRG.10000.4	Cp4.1LG00g08500	trans	uncharacterized protein At1g01500 [Cucurbita moschata]
MSTRG.10000.4	Cp4.1LG03g01080	trans	ribosome production factor 2 homolog [Cucurbita moschata]
MSTRG.10000.4	Cp4.1LG01g03870	trans	pyruvate dehydrogenase E1 component subunit alpha, mitochondrial-like [Cucurbita pepo subsp. pepo]
MSTRG.10000.4	Cp4.1LG04g08500	cis	probable protein phosphatase 2C 5 [Cucurbita moschata]
MSTRG.10000.4	Cp4.1LG03g12030	trans	calmodulin-binding transcription activator 3-like isoform X5 [Cucurbita pepo subsp. pepo]
MSTRG.10000.4	Cp4.1LG10g10400	trans	isocitrate dehydrogenase [NAD] regulatory subunit 1, mitochondrial-like [Cucurbita maxima]
MSTRG.10000.4	Cp4.1LG04g08470	cis	probable serine/threonine-protein kinase At1g54610 [Cucurbita pepo subsp. pepo]
MSTRG.10000.4	Cp4.1LG04g08460	cis	eukaryotic translation initiation factor 3 subunit A-like [Cucurbita pepo subsp. pepo]
MSTRG.10000.4	Cp4.1LG01g02210	trans	protein ALP1-like [Cucurbita pepo subsp. pepo]
MSTRG.10000.4	Cp4.1LG07g11510	trans	glucan endo-1,3-beta-glucosidase 11-like [Cucurbita pepo subsp. pepo]
MSTRG.10000.4	Cp4.1LG12g07440	trans	amino acid transporter AVT6E-like [Cucurbita pepo subsp. pepo]
MSTRG.10000.4	Cp4.1LG11g10780	trans	GDP-fucose transporter 1 [Cucurbita pepo subsp. pepo]
MSTRG.10000.4	Cp4.1LG04g08490	cis	F-box protein At2g02240-like [Cucurbita pepo subsp. pepo]
MSTRG.10000.4	Cp4.1LG08g12400	trans	lectin-domain containing receptor kinase VI.4-like [Cucurbita pepo subsp. pepo]
MSTRG.10000.4	Cp4.1LG05g02040	trans	ras-related protein RABH1b [Cucurbita moschata]
MSTRG.10000.4	Cp4.1LG04g08450	cis	putative polyol transporter 2 [Cucurbita moschata]
MSTRG.10000.4	Cp4.1LG11g00750	trans	uncharacterized protein LOC111804876 isoform X1 [Cucurbita pepo subsp. pepo]
MSTRG.10000.4	Cp4.1LG15g05570	trans	coatomer subunit alpha-1-like [Cucurbita pepo subsp. pepo]
MSTRG.10000.4	Cp4.1LG04g08480	cis	protein RALF-like 4 [Cucurbita moschata]
MSTRG.10000.4	Cp4.1LG08g04190	trans	pentatricopeptide repeat-containing protein At4g14820 [Cucurbita pepo subsp. pepo]
MSTRG.10000.4	Cp4.1LG12g03940	trans	uncharacterized protein LOC111807364 [Cucurbita pepo subsp. pepo]
MSTRG.10173.43	Cp4.1LG02g13120	trans	exocyst complex component EXO70H1-like [Cucurbita pepo subsp. pepo]
MSTRG.10173.43	Cp4.1LG04g15690	trans	uncharacterized protein LOC111793377 [Cucurbita pepo subsp. pepo]
MSTRG.10173.43	Cp4.1LG04g02810	trans	ethylene-responsive transcription factor 4-like [Cucurbita pepo subsp. pepo]
MSTRG.10173.43	Cp4.1LG04g06960	cis	chaperone protein dnaJ 20, chloroplastic-like [Cucurbita pepo subsp. pepo]
MSTRG.10173.43	Cp4.1LG08g05890	trans	uncharacterized protein LOC111800622 [Cucurbita pepo subsp. pepo]
MSTRG.10173.43	Cp4.1LG04g06920	cis	BAG family molecular chaperone regulator 7-like [Cucurbita pepo subsp. pepo]
MSTRG.10173.43	Cp4.1LG04g07010	cis	glycine-rich RNA-binding protein RZ1A [Cucumis melo var. makuwa]
MSTRG.10173.43	Cp4.1LG00g12450	trans	WUSCHEL-related homeobox 4-like [Cucurbita pepo subsp. pepo]
MSTRG.10173.43	Cp4.1LG06g01210	trans	probable galacturonosyltransferase-like 1 [Cucurbita pepo subsp. pepo]
MSTRG.10173.43	Cp4.1LG05g02530	trans	protein DETOXIFICATION 56-like [Cucurbita pepo subsp. pepo]
MSTRG.10173.43	Cp4.1LG14g09220	trans	uncharacterized protein LOC111809611 isoform X2 [Cucurbita pepo subsp. pepo]
MSTRG.10173.43	Cp4.1LG19g07990	trans	U-box domain-containing protein 4-like [Cucurbita pepo subsp. pepo]
MSTRG.10173.43	Cp4.1LG12g05870	trans	uncharacterized protein LOC111807760 [Cucurbita pepo subsp. pepo]
MSTRG.10173.43	Cp4.1LG01g02220	trans	ethylene-responsive transcription factor ERF109-like [Cucurbita moschata]
MSTRG.10173.43	Cp4.1LG12g04750	trans	phosphatidylinositol 4-kinase gamma 4-like [Cucurbita pepo subsp. pepo]
MSTRG.10173.43	Cp4.1LG04g06850	cis	nuclear transcription factor Y subunit C-2-like [Cucurbita pepo subsp. pepo]
MSTRG.10173.43	Cp4.1LG04g13820	trans	LEAF RUST 10 DISEASE-RESISTANCE LOCUS RECEPTOR-LIKE PROTEIN KINASE-like 1.2 [Cucurbita pepo subsp. pepo]
MSTRG.10173.43	Cp4.1LG05g07350	trans	ethylene-responsive transcription factor ERF105-like [Cucurbita pepo subsp. pepo]
MSTRG.10173.43	Cp4.1LG04g06890	cis	putative clathrin assembly protein At1g03050 [Cucurbita pepo subsp. pepo]
MSTRG.10173.43	Cp4.1LG08g12510	trans	uncharacterized protein LOC111799742 [Cucurbita pepo subsp. pepo]
MSTRG.10173.43	Cp4.1LG02g16900	trans	DELLA protein GAI-like [Cucurbita pepo subsp. pepo]
MSTRG.10173.43	Cp4.1LG07g04500	trans	probable galacturonosyltransferase-like 1 [Cucurbita pepo subsp. pepo]
MSTRG.10173.43	Cp4.1LG03g01900	trans	probable DNA helicase MCM8 isoform X2 [Coffea arabica]
MSTRG.10173.43	Cp4.1LG05g11100	trans	uncharacterized protein LOC111795769 [Cucurbita pepo subsp. pepo]
MSTRG.10173.43	Cp4.1LG15g06530	trans	cellulose synthase-like protein D4 [Cucurbita pepo subsp. pepo]
MSTRG.10173.43	Cp4.1LG19g07350	trans	F-box protein SKIP27-like [Cucurbita pepo subsp. pepo]
MSTRG.10173.43	Cp4.1LG04g06870	cis	mediator of RNA polymerase II transcription subunit 15a-like isoform X2 [Cucurbita pepo subsp. pepo]
MSTRG.10173.43	Cp4.1LG18g07190	trans	uncharacterized protein LOC111780695 [Cucurbita pepo subsp. pepo]
MSTRG.10173.43	Cp4.1LG01g11260	trans	zinc finger CCCH domain-containing protein 29-like [Cucurbita pepo subsp. pepo]
MSTRG.10173.43	Cp4.1LG17g10220	trans	probable WRKY transcription factor 53 [Cucurbita pepo subsp. pepo]
MSTRG.10173.43	Cp4.1LG04g06900	cis	Alcohol dehydrogenase superfamily [Macleaya cordata]
MSTRG.10173.43	Cp4.1LG04g06770	cis	mitochondrial proton/calcium exchanger protein-like [Cucurbita pepo subsp. pepo]
MSTRG.10173.43	Cp4.1LG04g06790	cis	integrin-linked protein kinase 1-like isoform X1 [Cucurbita pepo subsp. pepo]
MSTRG.10173.43	Cp4.1LG04g07020	cis	laccase-14 [Cucurbita pepo subsp. pepo]
MSTRG.10173.43	Cp4.1LG20g04650	trans	U-box domain-containing protein 17-like [Cucurbita pepo subsp. pepo]
MSTRG.10173.43	Cp4.1LG10g02800	trans	uncharacterized protein LOC111453073 isoform X1 [Cucurbita moschata]
MSTRG.10173.43	Cp4.1LG05g08120	trans	ethylene-responsive transcription factor ERF061-like [Cucurbita pepo subsp. pepo]
MSTRG.10173.43	Cp4.1LG04g07000	cis	non-specific lipid-transfer protein-like protein At5g64080 isoform X1 [Cucurbita pepo subsp. pepo]
MSTRG.10173.43	Cp4.1LG04g04310	trans	putative pentatricopeptide repeat-containing protein At5g09950 [Cucurbita pepo subsp. pepo]
MSTRG.10173.43	Cp4.1LG19g00310	trans	protein EARLY RESPONSIVE TO DEHYDRATION 15-like [Cucurbita moschata]
MSTRG.10173.43	Cp4.1LG04g06910	cis	2-(3-amino-3-carboxypropyl)histidine synthase subunit 1 [Cucurbita pepo subsp. pepo]
MSTRG.10173.43	Cp4.1LG03g17810	trans	adenosylhomocysteinase-like [Cucurbita pepo subsp. pepo]
MSTRG.10173.43	Cp4.1LG04g06860	cis	mediator of RNA polymerase II transcription subunit 15a-like [Cicer arietinum]
MSTRG.10173.43	Cp4.1LG18g09240	trans	membrane-anchored ubiquitin-fold protein 3 [Cucumis melo var. makuwa]
MSTRG.10173.43	Cp4.1LG04g06830	cis	NAC domain-containing protein 104-like [Cucurbita pepo subsp. pepo]
MSTRG.10173.43	Cp4.1LG03g04140	trans	calmodulin-binding protein 25-like [Cucurbita pepo subsp. pepo]
MSTRG.10173.43	Cp4.1LG16g07170	trans	protein unc-45 homolog B-like [Cucurbita pepo subsp. pepo]
MSTRG.10173.43	Cp4.1LG16g06240	trans	E3 ubiquitin-protein ligase RDUF2-like [Cucurbita pepo subsp. pepo]
MSTRG.10173.43	Cp4.1LG04g06880	cis	dynamin-like protein ARC5 isoform X2 [Cucurbita pepo subsp. pepo]
MSTRG.10173.43	Cp4.1LG15g05670	trans	uncharacterized protein LOC111776417 [Cucurbita pepo subsp. pepo]
MSTRG.10173.43	Cp4.1LG04g06800	cis	UDP-glycosyltransferase 74E2-like [Cucurbita pepo subsp. pepo]
MSTRG.10173.43	Cp4.1LG18g04650	trans	uncharacterized protein LOC111780539 [Cucurbita pepo subsp. pepo]
MSTRG.10173.43	Cp4.1LG14g09600	trans	transcription factor MYC4-like [Cucurbita pepo subsp. pepo]
MSTRG.10173.43	Cp4.1LG04g02190	trans	transcription factor JUNGBRUNNEN 1-like [Cucurbita pepo subsp. pepo]
MSTRG.10173.43	Cp4.1LG19g11040	trans	transcription factor MYB44-like [Cucurbita pepo subsp. pepo]
MSTRG.10173.43	Cp4.1LG04g06840	cis	actin-7-like [Cucurbita moschata]
MSTRG.10173.43	Cp4.1LG01g05350	trans	zinc finger CCCH domain-containing protein 29-like [Cucurbita pepo subsp. pepo]
MSTRG.10173.43	Cp4.1LG04g06820	cis	--
MSTRG.10173.43	Cp4.1LG04g06990	cis	beta-xylosidase/alpha-L-arabinofuranosidase 2-like isoform X1 [Cucurbita pepo subsp. pepo]
MSTRG.1028.4	Cp4.1LG03g06330	trans	uncharacterized protein LOC111013209 isoform X2 [Momordica charantia]
MSTRG.1028.4	Cp4.1LG00g09940	trans	uncharacterized protein LOC111785973 [Cucurbita pepo subsp. pepo]
MSTRG.1028.4	Cp4.1LG00g07760	cis	--
MSTRG.1028.4	Cp4.1LG00g07780	cis	E3 ubiquitin-protein ligase RNF165-like [Cucurbita pepo subsp. pepo]
MSTRG.1028.4	Cp4.1LG00g07700	cis	uncharacterized protein LOC111777849 [Cucurbita pepo subsp. pepo]
MSTRG.1028.4	Cp4.1LG00g07770	cis	bidirectional sugar transporter SWEET4-like [Cucurbita pepo subsp. pepo]
MSTRG.1028.4	Cp4.1LG00g07690	cis	probable LRR receptor-like serine/threonine-protein kinase At4g37250 [Cucurbita pepo subsp. pepo]
MSTRG.1028.4	Cp4.1LG00g07730	cis	30S ribosomal protein S6 alpha, chloroplastic-like [Cucurbita pepo subsp. pepo]
MSTRG.1028.4	Cp4.1LG00g07720	cis	uncharacterized protein LOC111791159 [Cucurbita pepo subsp. pepo]
MSTRG.1028.4	Cp4.1LG00g07750	cis	bidirectional sugar transporter SWEET4-like [Cucurbita pepo subsp. pepo]
MSTRG.1028.4	Cp4.1LG00g07710	cis	uncharacterized protein At5g39570-like isoform X1 [Cucurbita pepo subsp. pepo]
MSTRG.1028.4	Cp4.1LG00g07740	cis	uncharacterized protein LOC111785533 [Cucurbita pepo subsp. pepo]
MSTRG.1028.4	Cp4.1LG00g10330	trans	DNA primase small subunit-like [Cucurbita pepo subsp. pepo]
MSTRG.10299.4	Cp4.1LG04g05860	cis	KIN17-like protein [Cucurbita pepo subsp. pepo]
MSTRG.10299.4	Cp4.1LG04g05780	cis	probable carboxylesterase 16 [Cucurbita pepo subsp. pepo]
MSTRG.10299.4	Cp4.1LG04g05800	cis	transcription factor GTE8 isoform X2 [Cucurbita pepo subsp. pepo]
MSTRG.10299.4	Cp4.1LG04g05720	cis	E3 ubiquitin-protein ligase RNF168-like [Cucurbita pepo subsp. pepo]
MSTRG.10299.4	Cp4.1LG04g06000	cis	hypothetical protein E6C27_scaffold44G004520 [Cucumis melo var. makuwa]
MSTRG.10299.4	Cp4.1LG04g06010	cis	squamosa promoter-binding-like protein 13A [Cucurbita pepo subsp. pepo]
MSTRG.10299.4	Cp4.1LG04g05820	cis	fructose-bisphosphate aldolase-lysine N-methyltransferase, chloroplastic-like [Cucurbita pepo subsp. pepo]
MSTRG.10299.4	Cp4.1LG04g05710	cis	glucose-6-phosphate 1-dehydrogenase, cytoplasmic isoform-like [Cucurbita pepo subsp. pepo]
MSTRG.10299.4	Cp4.1LG06g07360	trans	universal stress protein PHOS32-like [Cucurbita pepo subsp. pepo]
MSTRG.10299.4	Cp4.1LG04g05920	cis	uncharacterized protein LOC111792558 [Cucurbita pepo subsp. pepo]
MSTRG.10299.4	Cp4.1LG04g05740	cis	lysine histidine transporter 1-like isoform X1 [Cucurbita pepo subsp. pepo]
MSTRG.10299.4	Cp4.1LG04g05890	cis	putative calcium-binding protein CML19 [Cucurbita pepo subsp. pepo]
MSTRG.10299.4	Cp4.1LG15g06670	trans	pentatricopeptide repeat-containing protein At4g38150-like isoform X1 [Cucurbita pepo subsp. pepo]
MSTRG.10299.4	Cp4.1LG07g08320	trans	probable E3 ubiquitin-protein ligase ARI8 [Cucurbita pepo subsp. pepo]
MSTRG.10299.4	Cp4.1LG04g05880	cis	uncharacterized protein LOC111792219 [Cucurbita pepo subsp. pepo]
MSTRG.10299.4	Cp4.1LG04g05950	cis	hypothetical protein GH714_041769 [Hevea brasiliensis]
MSTRG.10299.4	Cp4.1LG04g06090	cis	carbonyl reductase [NADPH] 2-like [Cucurbita pepo subsp. pepo]
MSTRG.10299.4	Cp4.1LG04g06030	cis	cytochrome P450 94B3-like [Cucurbita pepo subsp. pepo]
MSTRG.10299.4	Cp4.1LG04g05900	cis	mitochondrial import receptor subunit TOM20-like [Cucurbita pepo subsp. pepo]
MSTRG.10299.4	Cp4.1LG04g05850	cis	SWI/SNF complex component SNF12 homolog [Cucurbita pepo subsp. pepo]
MSTRG.10299.4	Cp4.1LG04g06040	cis	probable metal-nicotianamine transporter YSL6 [Cucurbita pepo subsp. pepo]
MSTRG.10299.4	Cp4.1LG04g05790	cis	AUGMIN subunit 6-like isoform X1 [Cucurbita pepo subsp. pepo]
MSTRG.10299.4	Cp4.1LG04g05970	cis	30S ribosomal protein S21, chloroplastic [Cucurbita pepo subsp. pepo]
MSTRG.10299.4	Cp4.1LG04g05930	cis	uncharacterized protein LOC111793050 [Cucurbita pepo subsp. pepo]
MSTRG.10299.4	Cp4.1LG04g05750	cis	uncharacterized protein LOC111794116 [Cucurbita pepo subsp. pepo]
MSTRG.10299.4	Cp4.1LG04g05700	cis	cytosolic Fe-S cluster assembly factor NBP35 [Cucurbita pepo subsp. pepo]
MSTRG.10299.4	Cp4.1LG04g06070	cis	probable WRKY transcription factor 75 [Cucurbita pepo subsp. pepo]
MSTRG.10299.4	Cp4.1LG06g04030	trans	--
MSTRG.10299.4	Cp4.1LG04g05990	cis	probable adenylate kinase 7, mitochondrial [Cucurbita pepo subsp. pepo]
MSTRG.10299.4	Cp4.1LG04g05960	cis	--
MSTRG.10299.4	Cp4.1LG04g06020	cis	B2 protein [Cucurbita pepo subsp. pepo]
MSTRG.10299.4	Cp4.1LG04g06110	cis	protein LAZY 1-like isoform X1 [Cucurbita pepo subsp. pepo]
MSTRG.10299.4	Cp4.1LG04g05870	cis	uncharacterized protein At3g27210-like [Cucurbita pepo subsp. pepo]
MSTRG.10299.4	Cp4.1LG04g05940	cis	F-box/kelch-repeat protein At3g27150 [Cucurbita pepo subsp. pepo]
MSTRG.10299.4	Cp4.1LG04g05770	cis	TLC domain-containing protein At5g14285-like [Cucurbita pepo subsp. pepo]
MSTRG.10299.4	Cp4.1LG04g05980	cis	uncharacterized protein LOC111792220 [Cucurbita pepo subsp. pepo]
MSTRG.10299.4	Cp4.1LG04g05910	cis	triacylglycerol lipase 2-like [Cucurbita pepo subsp. pepo]
MSTRG.10299.4	Cp4.1LG19g00750	trans	probably inactive leucine-rich repeat receptor-like protein kinase At5g06940 [Cucurbita pepo subsp. pepo]
MSTRG.10299.4	Cp4.1LG04g05730	cis	54S ribosomal protein L37, mitochondrial-like [Cucurbita pepo subsp. pepo]
MSTRG.10461.5	Cp4.1LG12g03650	trans	U-box domain-containing protein 33-like isoform X1 [Cucurbita pepo subsp. pepo]
MSTRG.10461.5	Cp4.1LG04g04550	cis	probable serine/threonine-protein kinase PIX13 [Cucurbita pepo subsp. pepo]
MSTRG.10461.5	Cp4.1LG04g04220	cis	long chain acyl-CoA synthetase 8 isoform X2 [Cucurbita pepo subsp. pepo]
MSTRG.10461.5	Cp4.1LG04g04480	cis	protein FAR1-RELATED SEQUENCE 5 [Prunus yedoensis var. nudiflora]
MSTRG.10461.5	Cp4.1LG04g04340	cis	uncharacterized protein LOC111435129 [Cucurbita moschata]
MSTRG.10461.5	Cp4.1LG02g01620	trans	NAC transcription factor 56-like [Cucurbita pepo subsp. pepo]
MSTRG.10461.5	Cp4.1LG00g15120	trans	protein trichome birefringence-like 19, partial [Cucurbita pepo subsp. pepo]
MSTRG.10461.5	Cp4.1LG04g04450	cis	calcium-dependent protein kinase 26-like [Cucurbita pepo subsp. pepo]
MSTRG.10461.5	Cp4.1LG04g04580	cis	actin cytoskeleton-regulatory complex protein PAN1-like isoform X1 [Cucurbita pepo subsp. pepo]
MSTRG.10461.5	Cp4.1LG04g04520	cis	ubiquitin domain-containing protein DSK2a-like [Cucurbita pepo subsp. pepo]
MSTRG.10461.5	Cp4.1LG04g04370	both	SNF1-related protein kinase regulatory subunit beta-2-like isoform X5 [Cucurbita pepo subsp. pepo]
MSTRG.10461.5	Cp4.1LG04g04570	cis	glutamate receptor 3.2-like [Cucurbita pepo subsp. pepo]
MSTRG.10461.5	Cp4.1LG04g04590	cis	mitochondrial phosphate carrier protein 1, mitochondrial [Cucurbita pepo subsp. pepo]
MSTRG.10461.5	Cp4.1LG20g07710	trans	--
MSTRG.10461.5	Cp4.1LG04g04420	cis	cellulose synthase-like protein D4 [Cucurbita pepo subsp. pepo]
MSTRG.10461.5	Cp4.1LG07g07290	trans	DNA repair protein XRCC3 homolog [Cucurbita pepo subsp. pepo]
MSTRG.10461.5	Cp4.1LG04g04360	cis	nudix hydrolase 7-like [Cucurbita pepo subsp. pepo]
MSTRG.10461.5	Cp4.1LG04g04430	cis	cysteine protease XCP1-like [Cucurbita pepo subsp. pepo]
MSTRG.10461.5	Cp4.1LG04g04390	cis	--
MSTRG.10461.5	Cp4.1LG04g04380	cis	protein THYLAKOID ASSEMBLY 8-like, chloroplastic [Cucurbita moschata]
MSTRG.10461.5	Cp4.1LG11g08270	trans	uncharacterized protein LOC111804689 [Cucurbita pepo subsp. pepo]
MSTRG.10461.5	Cp4.1LG04g04290	cis	acetyl-CoA acetyltransferase, cytosolic 1-like [Cucurbita pepo subsp. pepo]
MSTRG.10461.5	Cp4.1LG03g11500	trans	probable protein phosphatase 2C 40 isoform X2 [Cucurbita pepo subsp. pepo]
MSTRG.10461.5	Cp4.1LG07g01220	trans	hypothetical protein Csa_003919, partial [Cucumis sativus]
MSTRG.10461.5	Cp4.1LG09g10140	trans	--
MSTRG.10461.5	Cp4.1LG18g06260	trans	xyloglucan endotransglucosylase/hydrolase protein 22-like [Cucurbita pepo subsp. pepo]
MSTRG.10461.5	Cp4.1LG04g04270	cis	GBF-interacting protein 1-like [Cucurbita pepo subsp. pepo]
MSTRG.10461.5	Cp4.1LG01g05500	trans	abscisic acid receptor PYL4-like [Cucurbita pepo subsp. pepo]
MSTRG.10461.5	Cp4.1LG04g04470	cis	expansin-A16-like isoform X3 [Cucurbita pepo subsp. pepo]
MSTRG.10461.5	Cp4.1LG04g04530	cis	uncharacterized protein LOC111792409 isoform X1 [Cucurbita pepo subsp. pepo]
MSTRG.10461.5	Cp4.1LG05g03420	trans	hypothetical protein GIB67_008339 [Kingdonia uniflora]
MSTRG.10461.5	Cp4.1LG05g05130	trans	delta(12)-oleate desaturase-like [Cucurbita moschata]
MSTRG.10461.5	Cp4.1LG04g04400	cis	fasciclin-like arabinogalactan protein 2 [Cucurbita pepo subsp. pepo]
MSTRG.10461.5	Cp4.1LG04g04460	cis	3-hydroxy-3-methylglutaryl-coenzyme A reductase 1-like [Cucurbita maxima]
MSTRG.10461.5	Cp4.1LG04g04440	cis	brefeldin A-inhibited guanine nucleotide-exchange protein 1-like [Cucurbita pepo subsp. pepo]
MSTRG.10461.5	Cp4.1LG01g19040	trans	protein STRICTOSIDINE SYNTHASE-LIKE 10-like [Cucurbita pepo subsp. pepo]
MSTRG.10461.5	Cp4.1LG04g04230	cis	probable E3 ubiquitin-protein ligase XERICO [Cucurbita pepo subsp. pepo]
MSTRG.10461.5	Cp4.1LG04g04350	cis	uncharacterized protein LOC111792415 isoform X1 [Cucurbita pepo subsp. pepo]
MSTRG.10461.5	Cp4.1LG00g07280	trans	uncharacterized protein LOC111459420 [Cucurbita moschata]
MSTRG.10461.5	Cp4.1LG04g04500	cis	protein EXORDIUM-like 5 [Cucurbita pepo subsp. pepo]
MSTRG.10461.5	Cp4.1LG16g00740	trans	protein BOLA2 [Cucurbita pepo subsp. pepo]
MSTRG.10461.5	Cp4.1LG04g04540	cis	probable galacturonosyltransferase 3 [Cucurbita pepo subsp. pepo]
MSTRG.10461.5	Cp4.1LG15g00670	trans	uncharacterized protein LOC111811619 isoform X1 [Cucurbita pepo subsp. pepo]
MSTRG.10461.5	Cp4.1LG04g04410	cis	uncharacterized protein LOC111792510 [Cucurbita pepo subsp. pepo]
MSTRG.10461.5	Cp4.1LG04g04150	cis	transmembrane emp24 domain-containing protein p24beta2-like [Cucurbita pepo subsp. pepo]
MSTRG.10461.5	Cp4.1LG04g04490	cis	SEC1 family transport protein SLY1-like [Cucurbita pepo subsp. pepo]
MSTRG.10461.5	Cp4.1LG04g08650	trans	putative disease resistance protein RGA1 [Cucurbita moschata]
MSTRG.10461.5	Cp4.1LG04g04330	cis	uncharacterized protein LOC111435239 [Cucurbita moschata]
MSTRG.10461.5	Cp4.1LG04g04510	cis	uncharacterized protein At5g43822 [Cucurbita pepo subsp. pepo]
MSTRG.10461.7	Cp4.1LG04g04450	cis	calcium-dependent protein kinase 26-like [Cucurbita pepo subsp. pepo]
MSTRG.10461.7	Cp4.1LG04g04520	cis	ubiquitin domain-containing protein DSK2a-like [Cucurbita pepo subsp. pepo]
MSTRG.10461.7	Cp4.1LG04g04580	cis	actin cytoskeleton-regulatory complex protein PAN1-like isoform X1 [Cucurbita pepo subsp. pepo]
MSTRG.10461.7	Cp4.1LG04g04370	cis	SNF1-related protein kinase regulatory subunit beta-2-like isoform X5 [Cucurbita pepo subsp. pepo]
MSTRG.10461.7	Cp4.1LG04g04570	cis	glutamate receptor 3.2-like [Cucurbita pepo subsp. pepo]
MSTRG.10461.7	Cp4.1LG04g04340	cis	uncharacterized protein LOC111435129 [Cucurbita moschata]
MSTRG.10461.7	Cp4.1LG04g04480	cis	protein FAR1-RELATED SEQUENCE 5 [Prunus yedoensis var. nudiflora]
MSTRG.10461.7	Cp4.1LG04g04220	cis	long chain acyl-CoA synthetase 8 isoform X2 [Cucurbita pepo subsp. pepo]
MSTRG.10461.7	Cp4.1LG04g04550	cis	probable serine/threonine-protein kinase PIX13 [Cucurbita pepo subsp. pepo]
MSTRG.10461.7	Cp4.1LG04g04270	cis	GBF-interacting protein 1-like [Cucurbita pepo subsp. pepo]
MSTRG.10461.7	Cp4.1LG04g04290	cis	acetyl-CoA acetyltransferase, cytosolic 1-like [Cucurbita pepo subsp. pepo]
MSTRG.10461.7	Cp4.1LG04g04380	cis	protein THYLAKOID ASSEMBLY 8-like, chloroplastic [Cucurbita moschata]
MSTRG.10461.7	Cp4.1LG00g10400	trans	uncharacterized protein LOC111781937 [Cucurbita pepo subsp. pepo]
MSTRG.10461.7	Cp4.1LG04g04390	cis	--
MSTRG.10461.7	Cp4.1LG04g04360	cis	nudix hydrolase 7-like [Cucurbita pepo subsp. pepo]
MSTRG.10461.7	Cp4.1LG04g04430	cis	cysteine protease XCP1-like [Cucurbita pepo subsp. pepo]
MSTRG.10461.7	Cp4.1LG04g04590	cis	mitochondrial phosphate carrier protein 1, mitochondrial [Cucurbita pepo subsp. pepo]
MSTRG.10461.7	Cp4.1LG04g04420	cis	cellulose synthase-like protein D4 [Cucurbita pepo subsp. pepo]
MSTRG.10461.7	Cp4.1LG04g04350	cis	uncharacterized protein LOC111792415 isoform X1 [Cucurbita pepo subsp. pepo]
MSTRG.10461.7	Cp4.1LG04g04230	cis	probable E3 ubiquitin-protein ligase XERICO [Cucurbita pepo subsp. pepo]
MSTRG.10461.7	Cp4.1LG04g04440	cis	brefeldin A-inhibited guanine nucleotide-exchange protein 1-like [Cucurbita pepo subsp. pepo]
MSTRG.10461.7	Cp4.1LG04g04460	cis	3-hydroxy-3-methylglutaryl-coenzyme A reductase 1-like [Cucurbita maxima]
MSTRG.10461.7	Cp4.1LG06g08690	trans	probable long-chain-alcohol O-fatty-acyltransferase 5 [Cucurbita pepo subsp. pepo]
MSTRG.10461.7	Cp4.1LG04g04400	cis	fasciclin-like arabinogalactan protein 2 [Cucurbita pepo subsp. pepo]
MSTRG.10461.7	Cp4.1LG04g04530	cis	uncharacterized protein LOC111792409 isoform X1 [Cucurbita pepo subsp. pepo]
MSTRG.10461.7	Cp4.1LG04g04470	cis	expansin-A16-like isoform X3 [Cucurbita pepo subsp. pepo]
MSTRG.10461.7	Cp4.1LG04g04510	cis	uncharacterized protein At5g43822 [Cucurbita pepo subsp. pepo]
MSTRG.10461.7	Cp4.1LG04g04330	cis	uncharacterized protein LOC111435239 [Cucurbita moschata]
MSTRG.10461.7	Cp4.1LG04g04410	cis	uncharacterized protein LOC111792510 [Cucurbita pepo subsp. pepo]
MSTRG.10461.7	Cp4.1LG04g04150	cis	transmembrane emp24 domain-containing protein p24beta2-like [Cucurbita pepo subsp. pepo]
MSTRG.10461.7	Cp4.1LG04g04500	cis	protein EXORDIUM-like 5 [Cucurbita pepo subsp. pepo]
MSTRG.10461.7	Cp4.1LG14g00490	trans	uncharacterized protein LOC111436082 [Cucurbita moschata]
MSTRG.10461.7	Cp4.1LG04g04540	cis	probable galacturonosyltransferase 3 [Cucurbita pepo subsp. pepo]
MSTRG.10512.2	Cp4.1LG04g04110	cis	rho GDP-dissociation inhibitor 1-like isoform X1 [Cucurbita pepo subsp. pepo]
MSTRG.10512.2	Cp4.1LG04g04050	cis	UDP-glycosyltransferase 79B30-like [Cucurbita pepo subsp. pepo]
MSTRG.10512.2	Cp4.1LG13g02350	trans	L-lactate dehydrogenase A-like [Cucurbita pepo subsp. pepo]
MSTRG.10512.2	Cp4.1LG04g03920	cis	fimbrin-5-like [Cucurbita pepo subsp. pepo]
MSTRG.10512.2	Cp4.1LG04g03970	cis	WRKY transcription factor 1-like [Cucurbita pepo subsp. pepo]
MSTRG.10512.2	Cp4.1LG04g03820	cis	glycine-rich protein DC7.1-like [Cucurbita pepo subsp. pepo]
MSTRG.10512.2	Cp4.1LG04g03850	cis	DDB1- and CUL4-associated factor 13-like [Cucurbita pepo subsp. pepo]
MSTRG.10512.2	Cp4.1LG04g03900	cis	--
MSTRG.10512.2	Cp4.1LG04g03880	cis	--
MSTRG.10512.2	Cp4.1LG02g06470	trans	increased DNA methylation 1-like [Cucurbita pepo subsp. pepo]
MSTRG.10512.2	Cp4.1LG04g04080	cis	cytochrome b561 and DOMON domain-containing protein At5g47530-like [Cucurbita pepo subsp. pepo]
MSTRG.10512.2	Cp4.1LG04g04030	cis	protein DGCR14-like [Cucurbita pepo subsp. pepo]
MSTRG.10512.2	Cp4.1LG04g03860	cis	--
MSTRG.10512.2	Cp4.1LG12g02550	trans	tubby-like F-box protein 3 [Cucurbita pepo subsp. pepo]
MSTRG.10512.2	Cp4.1LG04g04130	cis	histidine kinase 2-like [Cucurbita pepo subsp. pepo]
MSTRG.10512.2	Cp4.1LG04g03910	cis	uncharacterized protein At4g28440-like [Cucurbita maxima]
MSTRG.10512.2	Cp4.1LG04g03890	cis	eukaryotic translation initiation factor 1A-like [Cucurbita moschata]
MSTRG.10512.2	Cp4.1LG04g04090	cis	threonine--tRNA ligase, chloroplastic/mitochondrial 2-like [Cucurbita pepo subsp. pepo]
MSTRG.10512.2	Cp4.1LG04g03870	cis	26S proteasome non-ATPase regulatory subunit 2 homolog A isoform X2 [Cucurbita pepo subsp. pepo]
MSTRG.10512.2	Cp4.1LG04g03980	cis	putative MO25-like protein At5g47540 [Cucurbita pepo subsp. pepo]
MSTRG.10512.2	Cp4.1LG04g03830	cis	uncharacterized protein LOC111437091 [Cucurbita moschata]
MSTRG.10512.2	Cp4.1LG04g04000	cis	cytochrome b561 and DOMON domain-containing protein At5g35735-like [Cucurbita pepo subsp. pepo]
MSTRG.10512.2	Cp4.1LG04g03950	cis	uncharacterized protein LOC111792530 [Cucurbita pepo subsp. pepo]
MSTRG.10512.2	Cp4.1LG04g04070	cis	BTB/POZ domain-containing protein At5g48130-like isoform X1 [Cucurbita pepo subsp. pepo]
MSTRG.10512.2	Cp4.1LG04g03930	cis	uncharacterized protein LOC111792532 [Cucurbita pepo subsp. pepo]
MSTRG.10512.2	Cp4.1LG04g03990	cis	uncharacterized protein LOC111437033 [Cucurbita moschata]
MSTRG.10512.2	Cp4.1LG04g03960	cis	protein NUCLEAR FUSION DEFECTIVE 6, chloroplastic/mitochondrial-like isoform X2 [Cucurbita moschata]
MSTRG.10512.2	Cp4.1LG04g03810	cis	glycine-rich protein DC7.1-like [Cucurbita pepo subsp. pepo]
MSTRG.10512.2	Cp4.1LG03g01350	trans	hypothetical protein Csa_001026 [Cucumis sativus]
MSTRG.10512.2	Cp4.1LG03g01090	trans	1,4-alpha-glucan-branching enzyme 2-2, chloroplastic/amyloplastic-like [Cucurbita pepo subsp. pepo]
MSTRG.10512.2	Cp4.1LG04g03790	cis	dnaJ homolog subfamily B member 1-like [Cucurbita pepo subsp. pepo]
MSTRG.10512.2	Cp4.1LG04g04010	cis	cytochrome b561 and DOMON domain-containing protein At5g47530-like [Cucurbita pepo subsp. pepo]
MSTRG.10512.2	Cp4.1LG04g04120	cis	fasciclin-like arabinogalactan protein 7 [Cucurbita pepo subsp. pepo]
MSTRG.10512.2	Cp4.1LG04g03940	cis	uncharacterized protein LOC111792531 [Cucurbita pepo subsp. pepo]
MSTRG.10512.2	Cp4.1LG04g03840	cis	transcription initiation factor TFIID subunit 6 [Cucurbita pepo subsp. pepo]
MSTRG.10774.1	Cp4.1LG02g02240	trans	major pollen allergen Ole e 10-like isoform X1 [Cucurbita pepo subsp. pepo]
MSTRG.10774.1	Cp4.1LG04g11980	cis	transcription factor bHLH122 isoform X2 [Cucurbita pepo subsp. pepo]
MSTRG.10774.1	Cp4.1LG13g01570	trans	tyrosine--tRNA ligase 1, cytoplasmic [Cucurbita pepo subsp. pepo]
MSTRG.10774.1	Cp4.1LG04g11950	cis	beta-glucosidase 12-like [Cucurbita pepo subsp. pepo]
MSTRG.10774.1	Cp4.1LG04g12150	cis	1-acyl-sn-glycerol-3-phosphate acyltransferase 3-like [Cucurbita pepo subsp. pepo]
MSTRG.10774.1	Cp4.1LG16g00440	trans	uncharacterized protein LOC111434949 [Cucurbita moschata]
MSTRG.10774.1	Cp4.1LG04g11820	cis	protein NRT1/ PTR FAMILY 7.1-like [Cucurbita pepo subsp. pepo]
MSTRG.10774.1	Cp4.1LG04g11810	cis	zinc finger CCCH domain-containing protein 14-like [Cucurbita pepo subsp. pepo]
MSTRG.10774.1	Cp4.1LG12g02490	trans	uncharacterized protein LOC111460229 [Cucurbita moschata]
MSTRG.10774.1	Cp4.1LG04g11990	cis	uncharacterized protein LOC111793608 isoform X1 [Cucurbita pepo subsp. pepo]
MSTRG.10774.1	Cp4.1LG04g12120	cis	chaperonin-like RbcX protein 2, chloroplastic [Cucurbita pepo subsp. pepo]
MSTRG.10774.1	Cp4.1LG13g07560	trans	WEB family protein At2g40480-like isoform X1 [Cucurbita pepo subsp. pepo]
MSTRG.10774.1	Cp4.1LG04g11930	cis	ETHYLENE INSENSITIVE 3-like 3 protein [Cucurbita pepo subsp. pepo]
MSTRG.10774.1	Cp4.1LG04g12000	cis	protein EMSY-LIKE 3-like isoform X2 [Cucurbita pepo subsp. pepo]
MSTRG.10774.1	Cp4.1LG04g11960	cis	E3 ubiquitin ligase BIG BROTHER-like [Cucurbita pepo subsp. pepo]
MSTRG.10774.1	Cp4.1LG05g13080	trans	translocon-associated protein subunit alpha-like [Cucurbita pepo subsp. pepo]
MSTRG.10774.1	Cp4.1LG00g03330	trans	60S ribosomal protein L26-1-like [Cucurbita moschata]
MSTRG.10774.1	Cp4.1LG08g04690	trans	lipase-like [Cucurbita moschata]
MSTRG.10774.1	Cp4.1LG04g11890	cis	phosphatidylinositol N-acetylglucosaminyltransferase subunit A isoform X1 [Cucurbita pepo subsp. pepo]
MSTRG.10774.1	Cp4.1LG06g04910	trans	U-box domain-containing protein 26 [Cucurbita maxima]
MSTRG.10774.1	Cp4.1LG06g04720	trans	trihelix transcription factor ASR3-like [Cucurbita pepo subsp. pepo]
MSTRG.10774.1	Cp4.1LG08g05290	trans	uncharacterized protein LOC111801047 isoform X1 [Cucurbita pepo subsp. pepo]
MSTRG.10774.1	Cp4.1LG04g11970	cis	non-structural maintenance of chromosomes element 4 homolog A-like isoform X2 [Cucurbita pepo subsp. pepo]
MSTRG.10774.1	Cp4.1LG01g25590	trans	uncharacterized protein LOC111779387 isoform X1 [Cucurbita pepo subsp. pepo]
MSTRG.10774.1	Cp4.1LG04g11800	cis	ribosome biogenesis regulatory protein homolog [Cucurbita pepo subsp. pepo]
MSTRG.10774.1	Cp4.1LG03g05170	trans	uncharacterized protein LOC111441584 isoform X2 [Cucurbita moschata]
MSTRG.10774.1	Cp4.1LG04g11880	cis	uncharacterized protein LOC111793117 [Cucurbita pepo subsp. pepo]
MSTRG.10774.1	Cp4.1LG06g06200	trans	sister chromatid cohesion protein PDS5 homolog A-like isoform X1 [Cucurbita pepo subsp. pepo]
MSTRG.10774.1	Cp4.1LG04g12010	cis	pentatricopeptide repeat-containing protein At2g22410, mitochondrial [Cucurbita pepo subsp. pepo]
MSTRG.10774.1	Cp4.1LG02g07420	trans	uncharacterized protein LOC111787800 [Cucurbita pepo subsp. pepo]
MSTRG.10774.1	Cp4.1LG08g08150	trans	hypothetical protein C3L33_09729, partial [Rhododendron williamsianum]
MSTRG.10774.1	Cp4.1LG04g11910	cis	uncharacterized protein LOC111793401 [Cucurbita pepo subsp. pepo]
MSTRG.10774.1	Cp4.1LG14g02130	trans	uncharacterized protein LOC111810037 [Cucurbita pepo subsp. pepo]
MSTRG.10774.1	Cp4.1LG04g12090	cis	zinc finger A20 and AN1 domain-containing stress-associated protein 8-like [Cucurbita pepo subsp. pepo]
MSTRG.10774.1	Cp4.1LG08g10550	trans	histone deacetylase HDT1 [Cucurbita pepo subsp. pepo]
MSTRG.10774.1	Cp4.1LG04g12110	cis	protein slowmo homolog [Cucurbita pepo subsp. pepo]
MSTRG.10774.1	Cp4.1LG04g11920	cis	uncharacterized protein LOC111793344 [Cucurbita pepo subsp. pepo]
MSTRG.10774.1	Cp4.1LG04g11870	cis	callose synthase 9-like isoform X2 [Cucurbita pepo subsp. pepo]
MSTRG.10774.1	Cp4.1LG04g11840	cis	callose synthase 9-like isoform X1 [Cucurbita pepo subsp. pepo]
MSTRG.10774.1	Cp4.1LG04g12040	cis	uncharacterized protein LOC111434687 [Cucurbita moschata]
MSTRG.10774.1	Cp4.1LG08g06740	trans	DNA replication licensing factor MCM2-like [Cucurbita maxima]
MSTRG.10774.1	Cp4.1LG04g11940	cis	AP2/ERF and B3 domain-containing transcription factor At1g50680-like [Cucurbita pepo subsp. pepo]
MSTRG.10774.1	Cp4.1LG11g06420	trans	40S ribosomal protein S8-like [Cucumis melo var. makuwa]
MSTRG.10774.1	Cp4.1LG17g05400	trans	homeobox-leucine zipper protein ATHB-15-like isoform X1 [Cucurbita pepo subsp. pepo]
MSTRG.10774.1	Cp4.1LG04g11830	cis	callose synthase 3-like [Cucurbita pepo subsp. pepo]
MSTRG.10774.1	Cp4.1LG17g07220	trans	60S ribosomal protein L19-1-like [Cucurbita maxima]
MSTRG.10774.1	Cp4.1LG10g07310	trans	putative zinc transporter At3g08650 [Cucurbita pepo subsp. pepo]
MSTRG.10774.1	Cp4.1LG04g12160	cis	protein mago nashi homolog [Cucurbita moschata]
MSTRG.10774.1	Cp4.1LG19g09040	trans	uncharacterized protein LOC111782028 [Cucurbita pepo subsp. pepo]
MSTRG.10774.1	Cp4.1LG04g11900	cis	lysine-specific demethylase JMJ30-like [Cucurbita pepo subsp. pepo]
MSTRG.10774.1	Cp4.1LG04g12060	cis	uncharacterized protein C26H5.04-like isoform X1 [Cucurbita pepo subsp. pepo]
MSTRG.10774.1	Cp4.1LG04g11860	cis	callose synthase 3-like [Cucurbita moschata]
MSTRG.10831.3	Cp4.1LG04g11500	cis	mediator of RNA polymerase II transcription subunit 13 [Cucurbita pepo subsp. pepo]
MSTRG.10831.3	Cp4.1LG04g11450	cis	ruBisCO large subunit-binding protein subunit beta, chloroplastic [Cucurbita pepo subsp. pepo]
MSTRG.10831.3	Cp4.1LG04g11490	cis	uncharacterized protein LOC111792591 [Cucurbita pepo subsp. pepo]
MSTRG.10831.3	Cp4.1LG04g11320	cis	3-oxoacyl-[acyl-carrier-protein] synthase II, chloroplastic-like [Cucurbita maxima]
MSTRG.10831.3	Cp4.1LG10g00800	trans	protein N-lysine methyltransferase METTL21A-like [Cucurbita pepo subsp. pepo]
MSTRG.10831.3	Cp4.1LG07g00810	trans	probable inactive purple acid phosphatase 1 isoform X1 [Cucurbita pepo subsp. pepo]
MSTRG.10831.3	Cp4.1LG20g02080	trans	pentatricopeptide repeat-containing protein At1g74900, mitochondrial [Cucurbita pepo subsp. pepo]
MSTRG.10831.3	Cp4.1LG04g11370	cis	transcription factor Pur-alpha 1-like [Cucurbita pepo subsp. pepo]
MSTRG.10831.3	Cp4.1LG04g11140	cis	beta-galactosidase 15-like isoform X2 [Cucurbita pepo subsp. pepo]
MSTRG.10831.3	Cp4.1LG04g11340	cis	protein FATTY ACID EXPORT 2, chloroplastic-like [Cucurbita pepo subsp. pepo]
MSTRG.10831.3	Cp4.1LG07g04360	trans	uncharacterized protein LOC111798186 [Cucurbita pepo subsp. pepo]
MSTRG.10831.3	Cp4.1LG16g04770	trans	indole-3-acetic acid-amido synthetase GH3.10 [Cucurbita pepo subsp. pepo]
MSTRG.10831.3	Cp4.1LG03g01080	trans	ribosome production factor 2 homolog [Cucurbita moschata]
MSTRG.10831.3	Cp4.1LG03g02780	trans	O-fucosyltransferase 19-like isoform X2 [Cucurbita pepo subsp. pepo]
MSTRG.10831.3	Cp4.1LG04g11150	cis	uncharacterized protein LOC111792603 [Cucurbita pepo subsp. pepo]
MSTRG.10831.3	Cp4.1LG00g04980	trans	receptor protein kinase TMK1-like [Cucurbita pepo subsp. pepo]
MSTRG.10831.3	Cp4.1LG04g11300	cis	probable serine/threonine-protein kinase PBL16 [Cucurbita pepo subsp. pepo]
MSTRG.10831.3	Cp4.1LG04g11390	cis	uncharacterized protein LOC111793912 [Cucurbita pepo subsp. pepo]
MSTRG.10831.3	Cp4.1LG04g11120	cis	hypothetical protein CUMW_030460 [Citrus unshiu]
MSTRG.10831.3	Cp4.1LG04g11290	cis	uncharacterized protein LOC111793247 [Cucurbita pepo subsp. pepo]
MSTRG.10831.3	Cp4.1LG04g11420	cis	leucine-rich repeat receptor-like protein kinase PEPR1 [Cucurbita pepo subsp. pepo]
MSTRG.10831.3	Cp4.1LG04g11410	cis	putative receptor-like protein kinase [Cucumis melo var. makuwa]
MSTRG.10831.3	Cp4.1LG08g12840	trans	uncharacterized protein LOC111800404 [Cucurbita pepo subsp. pepo]
MSTRG.10831.3	Cp4.1LG07g11510	trans	glucan endo-1,3-beta-glucosidase 11-like [Cucurbita pepo subsp. pepo]
MSTRG.10831.3	Cp4.1LG12g07440	trans	amino acid transporter AVT6E-like [Cucurbita pepo subsp. pepo]
MSTRG.10831.3	Cp4.1LG04g11350	cis	sucrose synthase [Cucurbita pepo subsp. pepo]
MSTRG.10831.3	Cp4.1LG18g05020	trans	zinc finger BED domain-containing protein DAYSLEEPER-like isoform X1 [Cucurbita pepo subsp. pepo]
MSTRG.10831.3	Cp4.1LG05g14500	trans	hypothetical protein FH972_014414 [Carpinus fangiana]
MSTRG.10831.3	Cp4.1LG04g11380	cis	uncharacterized protein LOC111794042 [Cucurbita pepo subsp. pepo]
MSTRG.10831.3	Cp4.1LG12g11830	trans	protein SLOW WALKER 1-like [Cucurbita pepo subsp. pepo]
MSTRG.10831.3	Cp4.1LG04g11170	cis	ethylene-responsive transcription factor ERF017 [Cucurbita pepo subsp. pepo]
MSTRG.10831.3	Cp4.1LG04g11460	cis	uncharacterized protein LOC111792593 [Cucurbita pepo subsp. pepo]
MSTRG.10831.3	Cp4.1LG04g11330	cis	--
MSTRG.10831.3	Cp4.1LG04g11470	cis	uncharacterized protein LOC111439183 [Cucurbita moschata]
MSTRG.10831.3	Cp4.1LG15g05570	trans	coatomer subunit alpha-1-like [Cucurbita pepo subsp. pepo]
MSTRG.10831.3	Cp4.1LG02g13290	trans	ATP-dependent Clp protease ATP-binding subunit ClpA homolog CD4B, chloroplastic-like isoform X1 [Cucurbita pepo subsp. pepo]
MSTRG.10831.3	Cp4.1LG05g07190	trans	probable serine/threonine protein kinase IRE isoform X1 [Cucurbita pepo subsp. pepo]
MSTRG.10831.3	Cp4.1LG04g11280	cis	alpha-aminoadipic semialdehyde synthase-like isoform X1 [Cucurbita pepo subsp. pepo]
MSTRG.10831.3	Cp4.1LG11g06750	trans	methyl-CpG-binding domain-containing protein 2-like [Cucurbita pepo subsp. pepo]
MSTRG.10831.3	Cp4.1LG04g11430	cis	calpain-type cysteine protease DEK1 [Cucurbita pepo subsp. pepo]
MSTRG.10831.3	Cp4.1LG05g13930	trans	uncharacterized protein LOC111796083 [Cucurbita pepo subsp. pepo]
MSTRG.10831.3	Cp4.1LG04g11480	cis	mediator of RNA polymerase II transcription subunit 13 [Cucurbita pepo subsp. pepo]
MSTRG.10831.3	Cp4.1LG04g11400	cis	potassium channel KOR2-like isoform X1 [Cucurbita pepo subsp. pepo]
MSTRG.10831.3	Cp4.1LG08g02970	trans	hydroxyethylthiazole kinase [Cucurbita pepo subsp. pepo]
MSTRG.10831.3	Cp4.1LG04g11440	cis	uncharacterized protein LOC111792962 [Cucurbita pepo subsp. pepo]
MSTRG.10831.3	Cp4.1LG04g11270	cis	eukaryotic translation initiation factor 3 subunit K-like [Cucurbita pepo subsp. pepo]
MSTRG.10831.3	Cp4.1LG04g11360	cis	probable flavin-containing monooxygenase 1 [Cucurbita pepo subsp. pepo]
MSTRG.10831.3	Cp4.1LG04g11310	cis	TATA-box-binding protein isoform X2 [Cucumis melo var. makuwa]
MSTRG.10990.1	Cp4.1LG04g09780	cis	sodium/pyruvate cotransporter BASS2, chloroplastic [Cucurbita pepo subsp. pepo]
MSTRG.10990.1	Cp4.1LG04g09570	cis	protein NRT1/ PTR FAMILY 6.2-like [Cucurbita pepo subsp. pepo]
MSTRG.10990.1	Cp4.1LG04g10020	cis	uncharacterized protein LOC111440909 [Cucurbita moschata]
MSTRG.10990.1	Cp4.1LG04g10000	cis	uncharacterized protein LOC111793404 [Cucurbita pepo subsp. pepo]
MSTRG.10990.1	Cp4.1LG04g09860	cis	myb family transcription factor EFM-like isoform X1 [Cucurbita pepo subsp. pepo]
MSTRG.10990.1	Cp4.1LG04g10030	cis	uncharacterized protein LOC111793223 [Cucurbita pepo subsp. pepo]
MSTRG.10990.1	Cp4.1LG04g09900	cis	dynein light chain 1, cytoplasmic-like [Cucurbita moschata]
MSTRG.10990.1	Cp4.1LG04g09800	cis	leucine-rich repeat extensin-like protein 4 [Cucurbita pepo subsp. pepo]
MSTRG.10990.1	Cp4.1LG04g09770	cis	pentatricopeptide repeat-containing protein At5g55740, chloroplastic [Cucurbita pepo subsp. pepo]
MSTRG.10990.1	Cp4.1LG04g09950	cis	chloroplast processing peptidase-like [Cucurbita pepo subsp. pepo]
MSTRG.10990.1	Cp4.1LG04g09850	cis	auxin-responsive protein IAA1-like isoform X2 [Cucurbita pepo subsp. pepo]
MSTRG.10990.1	Cp4.1LG04g09960	cis	proline-rich receptor-like protein kinase PERK1 [Cucurbita pepo subsp. pepo]
MSTRG.10990.1	Cp4.1LG04g09590	cis	NHP2-like protein 1 isoform X2 [Momordica charantia]
MSTRG.10990.1	Cp4.1LG04g09880	cis	aldehyde dehydrogenase family 2 member C4-like [Cucurbita pepo subsp. pepo]
MSTRG.10990.1	Cp4.1LG04g09980	cis	uncharacterized protein LOC111793229 [Cucurbita pepo subsp. pepo]
MSTRG.10990.1	Cp4.1LG04g09930	cis	indole-3-pyruvate monooxygenase YUCCA6-like [Cucurbita pepo subsp. pepo]
MSTRG.10990.1	Cp4.1LG04g09920	cis	probable chlorophyll(ide) b reductase NYC1, chloroplastic [Cucurbita pepo subsp. pepo]
MSTRG.10990.1	Cp4.1LG04g10040	cis	uncharacterized protein LOC111793228 isoform X1 [Cucurbita pepo subsp. pepo]
MSTRG.10990.1	Cp4.1LG04g09760	cis	VIN3-like protein 1 [Cucurbita pepo subsp. pepo]
MSTRG.10990.1	Cp4.1LG04g09820	cis	heavy metal-associated isoprenylated plant protein 45-like [Cucurbita pepo subsp. pepo]
MSTRG.10990.1	Cp4.1LG04g09870	cis	palmitoyl-acyl carrier protein thioesterase, chloroplastic-like [Cucurbita pepo subsp. pepo]
MSTRG.10990.1	Cp4.1LG04g09750	cis	probable strigolactone esterase DAD2 [Cucurbita pepo subsp. pepo]
MSTRG.10990.1	Cp4.1LG04g09710	cis	pentatricopeptide repeat-containing protein At4g32430, mitochondrial [Cucurbita pepo subsp. pepo]
MSTRG.10990.1	Cp4.1LG04g09740	cis	DELLA protein SLR1-like [Cucurbita pepo subsp. pepo]
MSTRG.10990.1	Cp4.1LG04g09940	cis	kinesin-like protein KIN-13B isoform X1 [Cucurbita pepo subsp. pepo]
MSTRG.10990.1	Cp4.1LG04g09830	cis	uncharacterized protein LOC111792318 [Cucurbita pepo subsp. pepo]
MSTRG.10990.1	Cp4.1LG04g09680	cis	uncharacterized protein LOC111793169 isoform X1 [Cucurbita pepo subsp. pepo]
MSTRG.10990.1	Cp4.1LG04g10010	cis	protein LIKE COV 1-like [Cucurbita pepo subsp. pepo]
MSTRG.10990.1	Cp4.1LG04g09890	cis	protein argonaute PNH1-like isoform X1 [Cucurbita pepo subsp. pepo]
MSTRG.10990.1	Cp4.1LG04g09790	cis	probable sulfate transporter 3.5 [Cucurbita pepo subsp. pepo]
MSTRG.10990.1	Cp4.1LG04g09910	cis	heat stress transcription factor C-1-like [Cucurbita pepo subsp. pepo]
MSTRG.10990.1	Cp4.1LG04g09990	cis	uncharacterized protein LOC111792283 [Cucurbita pepo subsp. pepo]
MSTRG.10990.1	Cp4.1LG04g09840	cis	probable inactive receptor kinase At2g26730 [Cucurbita pepo subsp. pepo]
MSTRG.10990.1	Cp4.1LG04g09970	cis	--
MSTRG.10990.1	Cp4.1LG04g09720	cis	2-alkenal reductase (NADP(+)-dependent)-like [Cucurbita pepo subsp. pepo]
MSTRG.10990.1	Cp4.1LG04g09810	cis	LOW QUALITY PROTEIN: fe-S cluster assembly factor HCF101, chloroplastic-like [Cucurbita moschata]
MSTRG.11047.1	Cp4.1LG04g09380	cis	ethylene-responsive transcription factor WIN1-like [Cucurbita pepo subsp. pepo]
MSTRG.11047.1	Cp4.1LG04g09280	cis	36.4 kDa proline-rich protein-like [Cucurbita pepo subsp. pepo]
MSTRG.11047.1	Cp4.1LG04g09450	cis	--
MSTRG.11047.1	Cp4.1LG04g09330	cis	WD repeat-containing protein 11-like [Cucurbita pepo subsp. pepo]
MSTRG.11047.1	Cp4.1LG04g09360	cis	zinc finger BED domain-containing protein DAYSLEEPER-like isoform X1 [Cucurbita pepo subsp. pepo]
MSTRG.11047.1	Cp4.1LG04g09310	cis	probable serine/threonine-protein kinase PIX7 [Cucurbita pepo subsp. pepo]
MSTRG.11047.1	Cp4.1LG04g09350	cis	U11/U12 small nuclear ribonucleoprotein 25 kDa protein-like isoform X1 [Cucurbita pepo subsp. pepo]
MSTRG.11047.1	Cp4.1LG04g09370	cis	equilibrative nucleotide transporter 8 [Cucurbita pepo subsp. pepo]
MSTRG.11047.1	Cp4.1LG04g09540	cis	uncharacterized protein LOC111792370 [Cucurbita pepo subsp. pepo]
MSTRG.11047.1	Cp4.1LG04g09490	cis	uncharacterized protein LOC111793727 [Cucurbita pepo subsp. pepo]
MSTRG.11047.1	Cp4.1LG04g09240	cis	probable galactinol--sucrose galactosyltransferase 6 isoform X2 [Cucurbita pepo subsp. pepo]
MSTRG.11047.1	Cp4.1LG04g09290	cis	auxin-responsive protein IAA29-like [Cucurbita pepo subsp. pepo]
MSTRG.11047.1	Cp4.1LG04g09090	cis	bifunctional purple acid phosphatase 26-like [Cucurbita pepo subsp. pepo]
MSTRG.11047.1	Cp4.1LG04g09320	cis	vesicle-associated membrane protein 711-like [Cucurbita moschata]
MSTRG.11047.1	Cp4.1LG04g09470	cis	SPX domain-containing protein 1-like [Cucurbita pepo subsp. pepo]
MSTRG.11047.1	Cp4.1LG04g09420	cis	axial regulator YABBY 5-like [Cucurbita moschata]
MSTRG.11047.1	Cp4.1LG01g07070	trans	leucine-rich repeat receptor-like serine/threonine-protein kinase BAM3 [Cucurbita moschata]
MSTRG.11047.1	Cp4.1LG04g09100	cis	probable sucrose-phosphate synthase 1 [Cucurbita pepo subsp. pepo]
MSTRG.11047.1	Cp4.1LG04g09250	cis	beta-1,4-mannosyl-glycoprotein 4-beta-N-acetylglucosaminyltransferase-like [Cucurbita pepo subsp. pepo]
MSTRG.11047.1	Cp4.1LG00g04500	trans	S-adenosylmethionine decarboxylase proenzyme-like [Cucumis melo var. makuwa]
MSTRG.11047.1	Cp4.1LG05g08510	trans	pentatricopeptide repeat-containing protein At4g21065-like [Cucurbita pepo subsp. pepo]
MSTRG.11047.1	Cp4.1LG01g22200	trans	uncharacterized protein LOC111790174 [Cucurbita pepo subsp. pepo]
MSTRG.11047.1	Cp4.1LG04g09400	cis	2-alkenal reductase (NADP(+)-dependent)-like [Cucurbita pepo subsp. pepo]
MSTRG.11047.1	Cp4.1LG04g09390	cis	heme oxygenase 1, chloroplastic [Cucurbita pepo subsp. pepo]
MSTRG.11047.1	Cp4.1LG04g09270	cis	putative clathrin assembly protein At2g25430 [Cucurbita pepo subsp. pepo]
MSTRG.11047.1	Cp4.1LG04g09200	cis	calmodulin-binding receptor-like cytoplasmic kinase 3 [Cucurbita pepo subsp. pepo]
MSTRG.11047.1	Cp4.1LG04g09300	cis	uncharacterized protein LOC111793348 [Cucurbita pepo subsp. pepo]
MSTRG.11047.1	Cp4.1LG04g09340	cis	CCR4-NOT transcription complex subunit 10-like isoform X1 [Cucurbita pepo subsp. pepo]
MSTRG.11047.1	Cp4.1LG04g09530	cis	EPIDERMAL PATTERNING FACTOR-like protein 1 isoform X1 [Cucurbita pepo subsp. pepo]
MSTRG.11047.1	Cp4.1LG04g09170	cis	uncharacterized protein LOC111006872 [Momordica charantia]
MSTRG.11047.1	Cp4.1LG19g03520	trans	uncharacterized protein LOC111782016 [Cucurbita pepo subsp. pepo]
MSTRG.11047.1	Cp4.1LG04g09520	cis	uncharacterized protein LOC111470604 [Cucurbita maxima]
MSTRG.11047.1	Cp4.1LG04g09480	cis	nuclear pore complex protein NUP1-like isoform X2 [Cucurbita pepo subsp. pepo]
MSTRG.11047.1	Cp4.1LG04g09260	cis	putative clathrin assembly protein At5g35200 isoform X1 [Cucurbita pepo subsp. pepo]
MSTRG.11047.1	Cp4.1LG04g09120	cis	N-alpha-acetyltransferase 35, NatC auxiliary subunit isoform X1 [Cucurbita pepo subsp. pepo]
MSTRG.11047.3	Cp4.1LG04g09480	cis	nuclear pore complex protein NUP1-like isoform X2 [Cucurbita pepo subsp. pepo]
MSTRG.11047.3	Cp4.1LG04g09120	cis	N-alpha-acetyltransferase 35, NatC auxiliary subunit isoform X1 [Cucurbita pepo subsp. pepo]
MSTRG.11047.3	Cp4.1LG04g09260	cis	putative clathrin assembly protein At5g35200 isoform X1 [Cucurbita pepo subsp. pepo]
MSTRG.11047.3	Cp4.1LG04g09520	cis	uncharacterized protein LOC111470604 [Cucurbita maxima]
MSTRG.11047.3	Cp4.1LG06g05180	trans	nitrate reductase [NADH]-like [Cucurbita pepo subsp. pepo]
MSTRG.11047.3	Cp4.1LG04g09340	cis	CCR4-NOT transcription complex subunit 10-like isoform X1 [Cucurbita pepo subsp. pepo]
MSTRG.11047.3	Cp4.1LG04g09170	cis	uncharacterized protein LOC111006872 [Momordica charantia]
MSTRG.11047.3	Cp4.1LG04g09530	cis	EPIDERMAL PATTERNING FACTOR-like protein 1 isoform X1 [Cucurbita pepo subsp. pepo]
MSTRG.11047.3	Cp4.1LG04g09270	cis	putative clathrin assembly protein At2g25430 [Cucurbita pepo subsp. pepo]
MSTRG.11047.3	Cp4.1LG01g01260	trans	uncharacterized protein LOC111790708 [Cucurbita pepo subsp. pepo]
MSTRG.11047.3	Cp4.1LG04g09300	cis	uncharacterized protein LOC111793348 [Cucurbita pepo subsp. pepo]
MSTRG.11047.3	Cp4.1LG04g09200	cis	calmodulin-binding receptor-like cytoplasmic kinase 3 [Cucurbita pepo subsp. pepo]
MSTRG.11047.3	Cp4.1LG13g03070	trans	bidirectional sugar transporter SWEET3b-like [Cucurbita pepo subsp. pepo]
MSTRG.11047.3	Cp4.1LG04g09400	cis	2-alkenal reductase (NADP(+)-dependent)-like [Cucurbita pepo subsp. pepo]
MSTRG.11047.3	Cp4.1LG04g03680	trans	MATE efflux family protein, partial [Prunus dulcis]
MSTRG.11047.3	Cp4.1LG04g09390	cis	heme oxygenase 1, chloroplastic [Cucurbita pepo subsp. pepo]
MSTRG.11047.3	Cp4.1LG04g09420	cis	axial regulator YABBY 5-like [Cucurbita moschata]
MSTRG.11047.3	Cp4.1LG04g09470	cis	SPX domain-containing protein 1-like [Cucurbita pepo subsp. pepo]
MSTRG.11047.3	Cp4.1LG04g09320	cis	vesicle-associated membrane protein 711-like [Cucurbita moschata]
MSTRG.11047.3	Cp4.1LG04g09250	cis	beta-1,4-mannosyl-glycoprotein 4-beta-N-acetylglucosaminyltransferase-like [Cucurbita pepo subsp. pepo]
MSTRG.11047.3	Cp4.1LG19g00390	trans	zeatin O-xylosyltransferase-like, partial [Cucurbita pepo subsp. pepo]
MSTRG.11047.3	Cp4.1LG04g09100	cis	probable sucrose-phosphate synthase 1 [Cucurbita pepo subsp. pepo]
MSTRG.11047.3	Cp4.1LG19g10190	trans	transcription factor bHLH19-like [Cucurbita pepo subsp. pepo]
MSTRG.11047.3	Cp4.1LG06g00120	trans	short-chain dehydrogenase/reductase family 42E member 1-like [Cucurbita pepo subsp. pepo]
MSTRG.11047.3	Cp4.1LG04g09090	cis	bifunctional purple acid phosphatase 26-like [Cucurbita pepo subsp. pepo]
MSTRG.11047.3	Cp4.1LG04g09240	cis	probable galactinol--sucrose galactosyltransferase 6 isoform X2 [Cucurbita pepo subsp. pepo]
MSTRG.11047.3	Cp4.1LG04g09290	cis	auxin-responsive protein IAA29-like [Cucurbita pepo subsp. pepo]
MSTRG.11047.3	Cp4.1LG04g09310	cis	probable serine/threonine-protein kinase PIX7 [Cucurbita pepo subsp. pepo]
MSTRG.11047.3	Cp4.1LG04g09350	cis	U11/U12 small nuclear ribonucleoprotein 25 kDa protein-like isoform X1 [Cucurbita pepo subsp. pepo]
MSTRG.11047.3	Cp4.1LG04g09370	cis	equilibrative nucleotide transporter 8 [Cucurbita pepo subsp. pepo]
MSTRG.11047.3	Cp4.1LG04g09360	cis	zinc finger BED domain-containing protein DAYSLEEPER-like isoform X1 [Cucurbita pepo subsp. pepo]
MSTRG.11047.3	Cp4.1LG04g09330	cis	WD repeat-containing protein 11-like [Cucurbita pepo subsp. pepo]
MSTRG.11047.3	Cp4.1LG04g09490	cis	uncharacterized protein LOC111793727 [Cucurbita pepo subsp. pepo]
MSTRG.11047.3	Cp4.1LG04g09540	cis	uncharacterized protein LOC111792370 [Cucurbita pepo subsp. pepo]
MSTRG.11047.3	Cp4.1LG04g09280	cis	36.4 kDa proline-rich protein-like [Cucurbita pepo subsp. pepo]
MSTRG.11047.3	Cp4.1LG04g09450	cis	--
MSTRG.11047.3	Cp4.1LG19g10090	trans	transcription factor bHLH131-like [Cucurbita pepo subsp. pepo]
MSTRG.11047.3	Cp4.1LG10g04380	trans	S-adenosylmethionine synthase 3-like [Cucurbita moschata]
MSTRG.11047.3	Cp4.1LG04g09380	cis	ethylene-responsive transcription factor WIN1-like [Cucurbita pepo subsp. pepo]
MSTRG.1111.1	Cp4.1LG00g07120	trans	PREDICTED: general transcription factor IIE subunit 2-like [Cucumis melo]
MSTRG.1111.1	Cp4.1LG00g06640	trans	dehydration-responsive element-binding protein 1E-like [Cucurbita pepo subsp. pepo]
MSTRG.1111.1	Cp4.1LG00g07270	trans	glucan endo-1,3-beta-glucosidase-like [Cucurbita pepo subsp. pepo]
MSTRG.1111.1	Cp4.1LG00g11380	trans	4-hydroxy-3-methylbut-2-en-1-yl diphosphate synthase (ferredoxin), chloroplastic [Cucurbita pepo subsp. pepo]
MSTRG.1111.1	Cp4.1LG00g08110	trans	uncharacterized protein LOC111785619 [Cucurbita pepo subsp. pepo]
MSTRG.1111.1	Cp4.1LG00g11310	trans	cell division control protein 2 homolog C-like [Cucurbita pepo subsp. pepo]
MSTRG.1111.1	Cp4.1LG00g10560	trans	rho GTPase-activating protein 2-like [Cucurbita pepo subsp. pepo]
MSTRG.1111.1	Cp4.1LG00g07460	trans	60S ribosomal protein L31-like [Cucurbita pepo subsp. pepo]
MSTRG.1111.1	Cp4.1LG00g10290	trans	putative uncharacterized protein DDB_G0282133 isoform X1 [Cucurbita pepo subsp. pepo]
MSTRG.1111.1	Cp4.1LG00g10960	trans	protein NETWORKED 4A-like isoform X4 [Cucurbita pepo subsp. pepo]
MSTRG.1111.1	Cp4.1LG00g10730	trans	ethylene-responsive transcription factor WIN1-like [Cucurbita pepo subsp. pepo]
MSTRG.1111.1	Cp4.1LG00g10080	trans	probable nucleolar protein 5-2 [Cucurbita pepo subsp. pepo]
MSTRG.1111.1	Cp4.1LG00g09190	trans	uncharacterized protein C594.04c-like [Cucurbita pepo subsp. pepo]
MSTRG.1111.1	Cp4.1LG00g08170	trans	cyclin-P3-1-like [Cucurbita moschata]
MSTRG.1111.1	Cp4.1LG00g08410	trans	conserved oligomeric Golgi complex subunit 1-like isoform X1 [Cucurbita pepo subsp. pepo]
MSTRG.1111.1	Cp4.1LG19g06270	trans	probable WRKY transcription factor 28 [Cucurbita pepo subsp. pepo]
MSTRG.1111.1	Cp4.1LG00g08620	trans	uncharacterized protein LOC111785703 [Cucurbita pepo subsp. pepo]
MSTRG.1111.1	Cp4.1LG00g06410	trans	WAT1-related protein At1g43650-like [Cucurbita pepo subsp. pepo]
MSTRG.1111.1	Cp4.1LG10g09930	trans	fumarylacetoacetase-like isoform X1 [Cucurbita pepo subsp. pepo]
MSTRG.1111.1	Cp4.1LG00g09010	trans	mitogen-activated protein kinase kinase kinase 2-like isoform X2 [Cucurbita moschata]
MSTRG.1111.1	Cp4.1LG00g08260	cis	65-kDa microtubule-associated protein 3-like [Cucurbita pepo subsp. pepo]
MSTRG.1111.1	Cp4.1LG00g02480	trans	--
MSTRG.1111.1	Cp4.1LG00g07390	trans	ribosomal L1 domain-containing protein 1-like [Cucurbita pepo subsp. pepo]
MSTRG.1111.1	Cp4.1LG00g08280	cis	E3 ubiquitin-protein ligase RGLG1-like [Cucurbita pepo subsp. pepo]
MSTRG.1111.1	Cp4.1LG00g06370	trans	nucleolin 1-like isoform X1 [Cucurbita pepo subsp. pepo]
MSTRG.1111.1	Cp4.1LG00g08370	cis	probable sugar phosphate/phosphate translocator At2g25520 [Cucurbita pepo subsp. pepo]
MSTRG.1111.1	Cp4.1LG00g10160	trans	uncharacterized protein LOC111786015, partial [Cucurbita pepo subsp. pepo]
MSTRG.1111.1	Cp4.1LG15g05850	trans	COBRA-like protein 2, partial [Cucurbita pepo subsp. pepo]
MSTRG.1111.1	Cp4.1LG16g01640	trans	NADH dehydrogenase [ubiquinone] iron-sulfur protein 6, mitochondrial-like [Cucurbita pepo subsp. pepo]
MSTRG.1111.1	Cp4.1LG00g08690	trans	vesicle-associated membrane protein 724-like [Cucurbita pepo subsp. pepo]
MSTRG.1111.1	Cp4.1LG00g05940	trans	uncharacterized protein At5g39865-like [Cucurbita pepo subsp. pepo]
MSTRG.1111.1	Cp4.1LG00g09650	trans	uncharacterized protein LOC111785907, partial [Cucurbita pepo subsp. pepo]
MSTRG.1111.1	Cp4.1LG00g08300	cis	glycerophosphodiester phosphodiesterase GDPD4-like [Cucurbita pepo subsp. pepo]
MSTRG.1111.1	Cp4.1LG00g01970	trans	uncharacterized protein LOC111784188 [Cucurbita pepo subsp. pepo]
MSTRG.1111.1	Cp4.1LG05g09050	trans	PREDICTED: uncharacterized protein LOC107825453 [Nicotiana tabacum]
MSTRG.1111.1	Cp4.1LG00g08880	trans	ethylene-responsive transcription factor RAP2-11-like [Cucurbita pepo subsp. pepo]
MSTRG.1111.1	Cp4.1LG00g08290	cis	GDSL esterase/lipase At5g14450-like, partial [Cucurbita pepo subsp. pepo]
MSTRG.1111.1	Cp4.1LG00g08360	cis	protein NRT1/ PTR FAMILY 6.2-like [Cucurbita pepo subsp. pepo]
MSTRG.1111.1	Cp4.1LG00g09490	trans	uncharacterized protein At3g28850-like [Cucurbita pepo subsp. pepo]
MSTRG.1111.1	Cp4.1LG00g07520	trans	LOB domain-containing protein 21-like isoform X1 [Cucurbita pepo subsp. pepo]
MSTRG.1111.1	Cp4.1LG00g12140	trans	pyruvate kinase 2, cytosolic-like [Cucurbita moschata]
MSTRG.1111.1	Cp4.1LG00g08350	cis	NHP2-like protein 1 isoform X1 [Cucumis melo var. makuwa]
MSTRG.1111.1	Cp4.1LG00g10830	trans	ethylene-responsive transcription factor CRF2-like [Cucurbita pepo subsp. pepo]
MSTRG.1111.1	Cp4.1LG00g09810	trans	uncharacterized protein LOC111801188 [Cucurbita pepo subsp. pepo]
MSTRG.1111.1	Cp4.1LG00g07170	trans	UBP1-associated protein 2B-like [Cucurbita pepo subsp. pepo]
MSTRG.1111.1	Cp4.1LG04g00980	trans	protein NUCLEAR FUSION DEFECTIVE 6, chloroplastic/mitochondrial [Cucurbita pepo subsp. pepo]
MSTRG.1111.1	Cp4.1LG00g08480	trans	aspartyl protease family protein 1-like [Cucurbita pepo subsp. pepo]
MSTRG.1111.1	Cp4.1LG00g08380	cis	uncharacterized protein LOC111785657 [Cucurbita pepo subsp. pepo]
MSTRG.1111.1	Cp4.1LG00g08310	cis	uroporphyrinogen decarboxylase 1, chloroplastic-like [Cucurbita pepo subsp. pepo]
MSTRG.1111.1	Cp4.1LG03g14570	trans	uncharacterized protein LOC111790257 [Cucurbita pepo subsp. pepo]
MSTRG.1111.1	Cp4.1LG00g06540	trans	kinesin-like protein KIN-1 [Cucurbita pepo subsp. pepo]
MSTRG.1111.1	Cp4.1LG00g06150	trans	zinc transporter 3-like [Cucurbita pepo subsp. pepo]
MSTRG.1111.1	Cp4.1LG00g06610	trans	probable LRR receptor-like serine/threonine-protein kinase At1g51880 [Cucurbita pepo subsp. pepo]
MSTRG.1111.1	Cp4.1LG00g04860	trans	F-box/kelch-repeat protein At5g60570-like [Cucurbita pepo subsp. pepo]
MSTRG.1111.1	Cp4.1LG00g07360	trans	pentatricopeptide repeat-containing protein At5g39980, chloroplastic-like [Cucurbita pepo subsp. pepo]
MSTRG.1111.1	Cp4.1LG00g06900	trans	monothiol glutaredoxin-S10-like [Cucurbita pepo subsp. pepo]
MSTRG.1111.1	Cp4.1LG00g09330	trans	methyltransferase-like protein 25 isoform X2 [Cucurbita pepo subsp. pepo]
MSTRG.1111.1	Cp4.1LG00g10920	trans	transcription factor bHLH123-like [Cucurbita pepo subsp. pepo]
MSTRG.1111.1	Cp4.1LG00g10510	trans	aspartic proteinase nepenthesin-1-like [Cucurbita pepo subsp. pepo]
MSTRG.1111.1	Cp4.1LG00g06770	trans	dof zinc finger protein DOF2.1-like [Cucurbita pepo subsp. pepo]
MSTRG.1111.1	Cp4.1LG00g09830	trans	high mobility group B protein 6-like [Cucurbita pepo subsp. pepo]
MSTRG.1111.1	Cp4.1LG00g09300	trans	1-aminocyclopropane-1-carboxylate oxidase 3-like isoform X1 [Cucurbita pepo subsp. pepo]
MSTRG.1111.1	Cp4.1LG03g07160	trans	E3 ubiquitin-protein ligase TRIM39-like [Cucurbita pepo subsp. pepo]
MSTRG.1111.1	Cp4.1LG08g01930	trans	uncharacterized protein LOC111801162 [Cucurbita pepo subsp. pepo]
MSTRG.1111.1	Cp4.1LG00g07600	trans	uncharacterized protein LOC111805453 [Cucurbita pepo subsp. pepo]
MSTRG.1111.1	Cp4.1LG00g08750	trans	sister chromatid cohesion protein SCC4-like [Cucurbita pepo subsp. pepo]
MSTRG.1111.1	Cp4.1LG00g06470	trans	DNA mismatch repair protein MSH4-like [Cucurbita pepo subsp. pepo]
MSTRG.1111.1	Cp4.1LG00g10720	trans	uncharacterized protein LOC111450850 [Cucurbita moschata]
MSTRG.1111.1	Cp4.1LG00g10590	trans	protein KINESIN LIGHT CHAIN-RELATED 1-like [Cucurbita pepo subsp. pepo]
MSTRG.1111.1	Cp4.1LG00g09480	trans	uncharacterized protein LOC111441419 [Cucurbita moschata]
MSTRG.1111.1	Cp4.1LG07g00290	trans	protein terminal ear1-like [Cucurbita pepo subsp. pepo]
MSTRG.1111.1	Cp4.1LG00g10440	trans	tRNA wybutosine-synthesizing protein 2/3/4-like [Cucurbita pepo subsp. pepo]
MSTRG.1111.1	Cp4.1LG00g08330	cis	pathogen-related protein-like [Cucurbita pepo subsp. pepo]
MSTRG.1111.1	Cp4.1LG00g06940	trans	alpha-mannosidase I MNS4 isoform X1 [Cucurbita pepo subsp. pepo]
MSTRG.1111.1	Cp4.1LG00g10430	trans	probable beta-1,3-galactosyltransferase 2 isoform X1 [Cucurbita pepo subsp. pepo]
MSTRG.1111.1	Cp4.1LG00g05950	trans	protein BRANCHLESS TRICHOME-like [Cucurbita pepo subsp. pepo]
MSTRG.1111.1	Cp4.1LG00g09740	trans	phosphatidylinositol:ceramide inositolphosphotransferase 1 isoform X1 [Cucurbita maxima]
MSTRG.1111.1	Cp4.1LG00g09030	trans	GDSL esterase/lipase At1g54790-like, partial [Cucurbita pepo subsp. pepo]
MSTRG.1111.1	Cp4.1LG00g11130	trans	uncharacterized protein LOC111786238 [Cucurbita pepo subsp. pepo]
MSTRG.1111.1	Cp4.1LG00g07110	trans	uncharacterized protein LOC111481959 isoform X4 [Cucurbita maxima]
MSTRG.1111.1	Cp4.1LG00g06320	trans	uncharacterized protein LOC111785283 isoform X1 [Cucurbita pepo subsp. pepo]
MSTRG.1111.1	Cp4.1LG00g09260	trans	O-fucosyltransferase 27-like isoform X1 [Cucurbita pepo subsp. pepo]
MSTRG.1111.1	Cp4.1LG10g05980	trans	protein TIFY 5A [Cucurbita pepo subsp. pepo]
MSTRG.1111.1	Cp4.1LG00g09820	trans	probable GABA transporter 2 isoform X1 [Cucurbita pepo subsp. pepo]
MSTRG.1111.1	Cp4.1LG00g08630	trans	lachrymatory-factor synthase-like [Cucurbita pepo subsp. pepo]
MSTRG.1111.1	Cp4.1LG00g07820	trans	U-box domain-containing protein 26 [Cucurbita maxima]
MSTRG.1111.1	Cp4.1LG00g08140	trans	peroxisomal adenine nucleotide carrier 1-like, partial [Cucurbita pepo subsp. pepo]
MSTRG.1111.1	Cp4.1LG00g08270	cis	hypersensitive-induced response protein 4-like [Cucurbita pepo subsp. pepo]
MSTRG.1111.1	Cp4.1LG00g07550	trans	dehydration-responsive element-binding protein 2C-like isoform X1 [Cucurbita pepo subsp. pepo]
MSTRG.1111.1	Cp4.1LG00g07580	trans	pre-mRNA-splicing factor CWC25-like [Cucurbita pepo subsp. pepo]
MSTRG.1111.1	Cp4.1LG00g09100	trans	putative Calcium-binding EF-hand family protein [Cucumis melo var. makuwa]
MSTRG.1111.1	Cp4.1LG00g06390	trans	beta-galactosidase 8-like isoform X1 [Cucurbita pepo subsp. pepo]
MSTRG.1111.1	Cp4.1LG00g08340	cis	peroxisomal acyl-coenzyme A oxidase 1-like [Cucurbita pepo subsp. pepo]
MSTRG.1111.1	Cp4.1LG00g08320	cis	tubby-like F-box protein 7 isoform X1 [Cucurbita pepo subsp. pepo]
MSTRG.11287.1	Cp4.1LG04g14250	cis	uncharacterized protein LOC111792383 [Cucurbita pepo subsp. pepo]
MSTRG.11287.1	Cp4.1LG04g14190	cis	ethylene-responsive transcription factor RAP2-2-like [Cucurbita pepo subsp. pepo]
MSTRG.11287.1	Cp4.1LG04g14200	cis	40S ribosomal protein S28-1-like isoform X1 [Cucurbita moschata]
MSTRG.11287.1	Cp4.1LG04g14400	cis	uncharacterized protein LOC111793816 [Cucurbita pepo subsp. pepo]
MSTRG.11287.1	Cp4.1LG04g14210	cis	hypothetical protein DVH24_023648 [Malus domestica]
MSTRG.11287.1	Cp4.1LG04g14230	cis	protein DENND6A-like [Cucurbita pepo subsp. pepo]
MSTRG.11287.1	Cp4.1LG04g14160	cis	enolase 1, chloroplastic [Cucurbita pepo subsp. pepo]
MSTRG.11287.1	Cp4.1LG16g02870	trans	putative ER lumen protein-retaining receptor C28H8.4 [Cucurbita maxima]
MSTRG.11287.1	Cp4.1LG04g14260	cis	probable acyl-activating enzyme 17, peroxisomal [Cucurbita pepo subsp. pepo]
MSTRG.11287.1	Cp4.1LG09g08260	trans	uncharacterized protein LOC111457111 [Cucurbita moschata]
MSTRG.11287.1	Cp4.1LG04g14370	cis	serine/threonine-protein kinase 16 [Cucurbita pepo subsp. pepo]
MSTRG.11287.1	Cp4.1LG04g14010	cis	uncharacterized protein LOC111793184 isoform X1 [Cucurbita pepo subsp. pepo]
MSTRG.11287.1	Cp4.1LG04g14180	cis	protein MIS12 homolog [Cucurbita pepo subsp. pepo]
MSTRG.11287.1	Cp4.1LG04g14300	cis	translation initiation factor eIF-2B subunit delta-like [Cucurbita pepo subsp. pepo]
MSTRG.11287.1	Cp4.1LG04g14320	cis	tetraspanin-8-like [Cucurbita pepo subsp. pepo]
MSTRG.11287.1	Cp4.1LG04g14140	cis	probable calcium-binding protein CML15 [Cucurbita moschata]
MSTRG.11287.1	Cp4.1LG04g14100	cis	transcription factor MYBS1-like [Cucurbita pepo subsp. pepo]
MSTRG.11287.1	Cp4.1LG04g14080	cis	protein ASPARTIC PROTEASE IN GUARD CELL 1-like [Cucurbita pepo subsp. pepo]
MSTRG.11287.1	Cp4.1LG04g14440	cis	WD repeat and HMG-box DNA-binding protein 1 [Cucurbita pepo subsp. pepo]
MSTRG.11287.1	Cp4.1LG04g13950	cis	LOB domain-containing protein 40-like [Cucurbita pepo subsp. pepo]
MSTRG.11287.1	Cp4.1LG04g14270	cis	G patch domain-containing protein TGH [Cucurbita pepo subsp. pepo]
MSTRG.11287.1	Cp4.1LG18g03130	trans	protein LURP-one-related 6-like [Cucurbita pepo subsp. pepo]
MSTRG.11287.1	Cp4.1LG04g14030	cis	uncharacterized protein LOC111793909 [Cucurbita pepo subsp. pepo]
MSTRG.11287.1	Cp4.1LG02g12290	trans	protein PHYTOCHROME KINASE SUBSTRATE 1-like [Cucurbita pepo subsp. pepo]
MSTRG.11287.1	Cp4.1LG04g13980	cis	uncharacterized WD repeat-containing protein C17D11.16 [Cucurbita pepo subsp. pepo]
MSTRG.11287.1	Cp4.1LG04g14120	cis	transcription factor JAMYB-like [Cucurbita pepo subsp. pepo]
MSTRG.11287.1	Cp4.1LG04g14220	cis	kinesin-like protein KIN-8A [Cucurbita pepo subsp. pepo]
MSTRG.11287.1	Cp4.1LG04g14290	cis	translation initiation factor eIF-2B subunit delta-like isoform X1 [Cucurbita pepo subsp. pepo]
MSTRG.11287.1	Cp4.1LG04g14020	cis	CRM-domain containing factor CFM3, chloroplastic/mitochondrial-like, partial [Cucurbita pepo subsp. pepo]
MSTRG.11287.1	Cp4.1LG10g01740	trans	phosphoenolpyruvate carboxykinase (ATP)-like [Cucurbita pepo subsp. pepo]
MSTRG.11287.1	Cp4.1LG04g14070	cis	VQ motif-containing protein 20 [Cucurbita pepo subsp. pepo]
MSTRG.11287.1	Cp4.1LG04g13940	cis	uncharacterized protein LOC111793186 [Cucurbita pepo subsp. pepo]
MSTRG.11287.1	Cp4.1LG04g14130	cis	NAC domain-containing protein 100 [Cucurbita pepo subsp. pepo]
MSTRG.11287.1	Cp4.1LG04g14240	cis	uridine-cytidine kinase C isoform X1 [Cucurbita pepo subsp. pepo]
MSTRG.11287.1	Cp4.1LG04g14280	cis	general transcription factor IIE subunit 1-like [Cucurbita pepo subsp. pepo]
MSTRG.11287.1	Cp4.1LG04g14380	cis	serine protease SPPA, chloroplastic [Cucurbita pepo subsp. pepo]
MSTRG.11287.1	Cp4.1LG04g13970	cis	uncharacterized protein LOC111793424 [Cucurbita pepo subsp. pepo]
MSTRG.11287.1	Cp4.1LG04g14490	cis	hypothetical protein E6C27_scaffold274G003310 [Cucumis melo var. makuwa]
MSTRG.11287.1	Cp4.1LG04g13960	cis	aluminum-activated malate transporter 9-like [Cucurbita pepo subsp. pepo]
MSTRG.11287.1	Cp4.1LG04g14150	cis	oleosin 1-like [Cucurbita moschata]
MSTRG.11287.1	Cp4.1LG04g14170	cis	agmatine deiminase [Cucurbita pepo subsp. pepo]
MSTRG.11287.1	Cp4.1LG04g13990	cis	transcription factor BEE 1-like isoform X1 [Cucurbita pepo subsp. pepo]
MSTRG.11287.1	Cp4.1LG06g02360	trans	protein kinase 4-like [Cucurbita pepo subsp. pepo]
MSTRG.11287.1	Cp4.1LG04g14310	cis	uncharacterized protein LOC111793589 [Cucurbita pepo subsp. pepo]
MSTRG.11287.1	Cp4.1LG04g14040	cis	uncharacterized protein LOC101217575 [Cucumis sativus]
MSTRG.11287.1	Cp4.1LG13g04700	trans	ubiquitin-fold modifier 1-like [Cucurbita pepo subsp. pepo]
MSTRG.11287.1	Cp4.1LG04g14330	cis	--
MSTRG.11447.4	Cp4.1LG00g14990	trans	dehydration-responsive element-binding protein 3-like [Cucurbita pepo subsp. pepo]
MSTRG.11447.4	Cp4.1LG04g15780	cis	pentatricopeptide repeat-containing protein At3g48250, chloroplastic [Cucurbita pepo subsp. pepo]
MSTRG.11447.4	Cp4.1LG04g15660	cis	diphthine methyltransferase [Cucurbita pepo subsp. pepo]
MSTRG.11447.4	Cp4.1LG17g09690	trans	uncharacterized protein LOC111778042 [Cucurbita pepo subsp. pepo]
MSTRG.11447.4	Cp4.1LG04g15550	cis	transcription factor MYB98-like [Cucurbita pepo subsp. pepo]
MSTRG.11447.4	Cp4.1LG04g15730	cis	hypothetical protein CR513_59835, partial [Mucuna pruriens]
MSTRG.11447.4	Cp4.1LG04g15770	cis	PREDICTED: uncharacterized protein LOC103502387 isoform X3 [Cucumis melo]
MSTRG.11447.4	Cp4.1LG04g15750	cis	uncharacterized protein LOC111793219 isoform X1 [Cucurbita pepo subsp. pepo]
MSTRG.11447.4	Cp4.1LG04g15840	cis	CRAL-TRIO domain-containing protein C3H8.02-like [Cucurbita pepo subsp. pepo]
MSTRG.11447.4	Cp4.1LG04g15820	cis	elongation factor Tu, chloroplastic-like [Cucurbita pepo subsp. pepo]
MSTRG.11447.4	Cp4.1LG04g15700	cis	FKBP12-interacting protein of 37 kDa-like isoform X1 [Cucurbita pepo subsp. pepo]
MSTRG.11447.4	Cp4.1LG01g20880	trans	uncharacterized protein LOC111460594 [Cucurbita moschata]
MSTRG.11447.4	Cp4.1LG14g01720	trans	protein SHI RELATED SEQUENCE 1-like [Cucurbita pepo subsp. pepo]
MSTRG.11447.4	Cp4.1LG12g09480	trans	uncharacterized protein LOC111807416 isoform X1 [Cucurbita pepo subsp. pepo]
MSTRG.11447.4	Cp4.1LG04g15680	cis	plant intracellular Ras-group-related LRR protein 9-like [Cucurbita pepo subsp. pepo]
MSTRG.11447.4	Cp4.1LG04g15670	cis	uncharacterized protein LOC111793216 [Cucurbita pepo subsp. pepo]
MSTRG.11447.4	Cp4.1LG04g15740	cis	myb-related protein 308-like isoform X1 [Cucurbita pepo subsp. pepo]
MSTRG.11447.4	Cp4.1LG04g15860	cis	pentatricopeptide repeat-containing protein At1g08070, chloroplastic-like [Momordica charantia]
MSTRG.11447.4	Cp4.1LG04g15630	cis	serine/threonine-protein kinase ATM isoform X2 [Cucurbita moschata]
MSTRG.11447.4	Cp4.1LG04g15620	cis	serine/threonine-protein kinase ATM [Cucurbita pepo subsp. pepo]
MSTRG.11447.4	Cp4.1LG10g08680	trans	dof zinc finger protein DOF3.6-like [Cucurbita pepo subsp. pepo]
MSTRG.11447.4	Cp4.1LG04g15950	cis	cytochrome P450 71A6-like [Cucurbita pepo subsp. pepo]
MSTRG.11447.4	Cp4.1LG04g15810	cis	LRR receptor-like serine/threonine-protein kinase [Cucurbita pepo subsp. pepo]
MSTRG.11447.4	Cp4.1LG07g08100	trans	cysteine-rich repeat secretory protein 3-like [Cucurbita pepo subsp. pepo]
MSTRG.11447.4	Cp4.1LG04g15790	cis	uncharacterized protein LOC111793197 isoform X1 [Cucurbita pepo subsp. pepo]
MSTRG.11447.4	Cp4.1LG04g15600	cis	protein MODIFIER OF SNC1 1-like [Cucurbita pepo subsp. pepo]
MSTRG.11447.4	Cp4.1LG04g15760	cis	uncharacterized protein LOC111793218 [Cucurbita pepo subsp. pepo]
MSTRG.11447.4	Cp4.1LG04g15830	cis	histone deacetylase 6-like [Cucurbita moschata]
MSTRG.11447.4	Cp4.1LG04g15640	cis	serine/threonine-protein kinase ATM [Cucurbita pepo subsp. pepo]
MSTRG.11447.4	Cp4.1LG04g15800	cis	hypothetical protein Csa_013504 [Cucumis sativus]
MSTRG.11447.4	Cp4.1LG04g15580	cis	serine/threonine-protein kinase ATM [Cucurbita pepo subsp. pepo]
MSTRG.11447.4	Cp4.1LG04g15560	cis	homeobox protein knotted-1-like 6 [Cucurbita pepo subsp. pepo]
MSTRG.11447.4	Cp4.1LG12g04020	trans	uncharacterized protein LOC111807367 [Cucurbita pepo subsp. pepo]
MSTRG.11447.4	Cp4.1LG04g15850	cis	protein LATERAL ORGAN BOUNDARIES-like isoform X1 [Cucurbita pepo subsp. pepo]
MSTRG.11447.4	Cp4.1LG04g15710	cis	protein DETOXIFICATION 16-like isoform X1 [Cucurbita moschata]
MSTRG.11447.4	Cp4.1LG04g15650	cis	uncharacterized protein LOC111793692 isoform X1 [Cucurbita pepo subsp. pepo]
MSTRG.11447.4	Cp4.1LG04g15610	cis	serine/threonine-protein kinase ATM [Cucurbita pepo subsp. pepo]
MSTRG.11447.4	Cp4.1LG07g10290	trans	protein DETOXIFICATION 51-like [Cucurbita pepo subsp. pepo]
MSTRG.11447.4	Cp4.1LG04g15570	cis	serine/threonine protein phosphatase 2A 55 kDa regulatory subunit B beta isoform-like [Cucurbita pepo subsp. pepo]
MSTRG.11447.4	Cp4.1LG16g03330	trans	cytokinin riboside 5'-monophosphate phosphoribohydrolase LOG5-like [Cucurbita pepo subsp. pepo]
MSTRG.11447.4	Cp4.1LG04g15590	cis	uncharacterized protein LOC111793688 [Cucurbita pepo subsp. pepo]
MSTRG.11447.4	Cp4.1LG04g15420	cis	peroxisomal membrane protein PEX14-like isoform X1 [Cucurbita pepo subsp. pepo]
MSTRG.11447.4	Cp4.1LG04g15690	cis	uncharacterized protein LOC111793377 [Cucurbita pepo subsp. pepo]
MSTRG.11447.4	Cp4.1LG04g15720	cis	cell division cycle protein 48 homolog [Cucurbita pepo subsp. pepo]
MSTRG.11813.1	Cp4.1LG00g09520	trans	17.8 kDa class I heat shock protein-like [Cucurbita pepo subsp. pepo]
MSTRG.11813.1	Cp4.1LG05g02680	cis	NAC domain-containing protein 7-like [Cucurbita pepo subsp. pepo]
MSTRG.11813.1	Cp4.1LG05g02460	cis	probable aminotransferase ACS10 [Cucurbita pepo subsp. pepo]
MSTRG.11813.1	Cp4.1LG05g02660	cis	elongation factor G-2, chloroplastic-like [Cucurbita pepo subsp. pepo]
MSTRG.11813.1	Cp4.1LG17g00040	trans	probable WRKY transcription factor 48 [Cucurbita pepo subsp. pepo]
MSTRG.11813.1	Cp4.1LG05g02600	both	protein ODORANT1-like [Cucurbita pepo subsp. pepo]
MSTRG.11813.1	Cp4.1LG05g03920	cis	probable protein S-acyltransferase 14 [Cucurbita moschata]
MSTRG.11813.1	Cp4.1LG19g02330	trans	protein RALF-like 31 [Cucurbita moschata]
MSTRG.11813.1	Cp4.1LG02g07260	trans	uncharacterized protein LOC111788996 [Cucurbita pepo subsp. pepo]
MSTRG.11813.1	Cp4.1LG05g03640	cis	AT-hook motif nuclear-localized protein 22-like [Cucurbita pepo subsp. pepo]
MSTRG.11813.1	Cp4.1LG05g03870	cis	AT-hook motif nuclear-localized protein 1-like [Cucurbita pepo subsp. pepo]
MSTRG.11813.1	Cp4.1LG06g03960	trans	transcription factor bHLH93-like [Cucurbita pepo subsp. pepo]
MSTRG.11813.1	Cp4.1LG03g13050	trans	hypothetical protein Csa_023800, partial [Cucumis sativus]
MSTRG.11813.1	Cp4.1LG03g16310	trans	putative glucose-6-phosphate 1-epimerase [Cucurbita pepo subsp. pepo]
MSTRG.11813.1	Cp4.1LG05g02550	cis	geraniol 8-hydroxylase-like [Cucurbita pepo subsp. pepo]
MSTRG.11813.1	Cp4.1LG12g05430	trans	protein no-on-transient A-like [Cucumis melo var. makuwa]
MSTRG.11813.1	Cp4.1LG03g05700	trans	leucine-rich repeat extensin-like protein 3 [Cucurbita pepo subsp. pepo]
MSTRG.11813.1	Cp4.1LG05g02710	cis	uncharacterized protein LOC111459315 isoform X1 [Cucurbita moschata]
MSTRG.11813.1	Cp4.1LG04g16040	trans	probable calcium-binding protein CML31 [Cucurbita pepo subsp. pepo]
MSTRG.11813.1	Cp4.1LG05g02610	cis	AT-hook motif nuclear-localized protein 24-like [Cucurbita pepo subsp. pepo]
MSTRG.11813.1	Cp4.1LG05g03730	cis	protein cornichon homolog 4-like [Cucurbita pepo subsp. pepo]
MSTRG.11813.1	Cp4.1LG05g03860	cis	maspardin-like [Cucurbita pepo subsp. pepo]
MSTRG.11813.1	Cp4.1LG11g00370	trans	protein terminal ear1-like isoform X1 [Cucurbita pepo subsp. pepo]
MSTRG.11813.1	Cp4.1LG00g13810	trans	WAT1-related protein At5g07050-like, partial [Cucurbita pepo subsp. pepo]
MSTRG.11813.1	Cp4.1LG18g03410	trans	protein ALP1-like [Cucurbita pepo subsp. pepo]
MSTRG.11813.1	Cp4.1LG09g10260	trans	uncharacterized protein LOC111802666 [Cucurbita pepo subsp. pepo]
MSTRG.11813.1	Cp4.1LG00g00800	trans	uncharacterized protein LOC111786686 [Cucurbita pepo subsp. pepo]
MSTRG.11813.1	Cp4.1LG05g03840	cis	ubiquitin carboxyl-terminal hydrolase MINDY-1-like isoform X1 [Cucurbita pepo subsp. pepo]
MSTRG.11813.1	Cp4.1LG00g13100	trans	probable folate-biopterin transporter 7 [Cucurbita moschata]
MSTRG.11813.1	Cp4.1LG05g02580	cis	zinc finger A20 and AN1 domain-containing stress-associated protein 1-like [Cucurbita pepo subsp. pepo]
MSTRG.11813.1	Cp4.1LG00g14940	trans	NDR1/HIN1-like protein 10 [Cucurbita pepo subsp. pepo]
MSTRG.11813.1	Cp4.1LG05g08890	trans	zinc finger protein ZAT11-like [Cucurbita pepo subsp. pepo]
MSTRG.11813.1	Cp4.1LG00g08930	trans	uncharacterized protein LOC111785757 [Cucurbita pepo subsp. pepo]
MSTRG.11813.1	Cp4.1LG07g10210	trans	hypothetical protein Csa_019490 [Cucumis sativus]
MSTRG.11813.1	Cp4.1LG05g03610	cis	IRK-interacting protein-like [Cucurbita pepo subsp. pepo]
MSTRG.11813.1	Cp4.1LG18g02740	trans	ethylene-responsive transcription factor ERF017-like [Cucurbita pepo subsp. pepo]
MSTRG.11813.1	Cp4.1LG05g02770	cis	geraniol 8-hydroxylase-like [Cucurbita pepo subsp. pepo]
MSTRG.11813.1	Cp4.1LG19g09050	trans	transcription factor bHLH110-like [Cucurbita pepo subsp. pepo]
MSTRG.11813.1	Cp4.1LG05g03790	cis	uncharacterized protein LOC111795817 [Cucurbita pepo subsp. pepo]
MSTRG.11813.1	Cp4.1LG09g11440	trans	tetraspanin-11-like [Cucurbita pepo subsp. pepo]
MSTRG.11813.1	Cp4.1LG05g03810	cis	transcription factor bHLH118-like [Cucurbita pepo subsp. pepo]
MSTRG.11813.1	Cp4.1LG00g09880	trans	5'-adenylylsulfate reductase-like 5, partial [Cucurbita pepo subsp. pepo]
MSTRG.11813.1	Cp4.1LG04g07540	trans	zinc finger protein ZAT10-like [Cucurbita pepo subsp. pepo]
MSTRG.11813.1	Cp4.1LG00g09590	trans	transcription factor MUTE-like [Cucurbita pepo subsp. pepo]
MSTRG.11813.1	Cp4.1LG10g09990	trans	protein PYRICULARIA ORYZAE RESISTANCE 21-like [Cucurbita pepo subsp. pepo]
MSTRG.11813.1	Cp4.1LG06g00190	trans	uncharacterized protein LOC111797306 [Cucurbita pepo subsp. pepo]
MSTRG.11813.1	Cp4.1LG06g01950	trans	zinc finger protein ZAT10-like [Cucurbita pepo subsp. pepo]
MSTRG.11813.1	Cp4.1LG11g04410	trans	protein EXORDIUM-like [Cucurbita pepo subsp. pepo]
MSTRG.11813.1	Cp4.1LG03g04440	trans	zinc finger A20 and AN1 domain-containing stress-associated protein 5-like [Cucurbita moschata]
MSTRG.11813.1	Cp4.1LG04g15530	trans	serine/threonine-protein kinase HT1-like [Cucurbita moschata]
MSTRG.11813.1	Cp4.1LG05g03660	cis	primary amine oxidase-like [Cucurbita pepo subsp. pepo]
MSTRG.11813.1	Cp4.1LG05g03680	cis	9-cis-epoxycarotenoid dioxygenase NCED3, chloroplastic-like [Cucurbita pepo subsp. pepo]
MSTRG.11813.1	Cp4.1LG02g04040	trans	protein PHOX1-like [Cucurbita pepo subsp. pepo]
MSTRG.11813.1	Cp4.1LG05g03700	cis	40S ribosomal protein S13-like [Cucurbita moschata]
MSTRG.11813.1	Cp4.1LG00g08900	trans	5'-adenylylsulfate reductase-like 5, partial [Cucurbita pepo subsp. pepo]
MSTRG.11813.1	Cp4.1LG14g00130	trans	calcium-binding protein PBP1-like [Cucurbita moschata]
MSTRG.11813.1	Cp4.1LG08g10250	trans	protein ABSCISIC ACID-INSENSITIVE 5-like isoform X1 [Cucurbita pepo subsp. pepo]
MSTRG.11813.1	Cp4.1LG05g03970	cis	subtilisin-like protease SBT1.8 [Cucurbita pepo subsp. pepo]
MSTRG.11813.1	Cp4.1LG08g09760	trans	probable aspartyl protease At4g16563 [Cucurbita pepo subsp. pepo]
MSTRG.11813.1	Cp4.1LG05g02630	cis	protein LITTLE ZIPPER 2-like [Cucurbita pepo subsp. pepo]
MSTRG.11813.1	Cp4.1LG01g15340	trans	uncharacterized protein LOC111809342 [Cucurbita pepo subsp. pepo]
MSTRG.11813.1	Cp4.1LG13g05220	trans	uncharacterized protein LOC111808736 [Cucurbita pepo subsp. pepo]
MSTRG.11813.1	Cp4.1LG01g13200	trans	uncharacterized protein LOC111488762 [Cucurbita maxima]
MSTRG.11813.1	Cp4.1LG00g13400	trans	uncharacterized protein LOC111786741, partial [Cucurbita pepo subsp. pepo]
MSTRG.11813.1	Cp4.1LG20g00220	trans	pectinesterase 3-like [Cucurbita pepo subsp. pepo]
MSTRG.11813.1	Cp4.1LG05g02530	cis	protein DETOXIFICATION 56-like [Cucurbita pepo subsp. pepo]
MSTRG.11813.1	Cp4.1LG05g02720	cis	uncharacterized protein LOC111794981 [Cucurbita pepo subsp. pepo]
MSTRG.11813.1	Cp4.1LG01g18800	trans	putative Ileal sodium/bile acid cotransporter [Cucumis melo var. makuwa]
MSTRG.11813.1	Cp4.1LG00g00660	trans	uncharacterized protein LOC111783941 [Cucurbita pepo subsp. pepo]
MSTRG.11813.1	Cp4.1LG00g13700	trans	protein PHYTOCHROME KINASE SUBSTRATE 4-like [Cucurbita pepo subsp. pepo]
MSTRG.11813.1	Cp4.1LG19g01910	trans	PREDICTED: uncharacterized protein LOC103485982 [Cucumis melo]
MSTRG.11813.1	Cp4.1LG06g00840	trans	uncharacterized TPR repeat-containing protein At1g05150-like [Cucurbita pepo subsp. pepo]
MSTRG.11813.1	Cp4.1LG19g06900	trans	CBL-interacting serine/threonine-protein kinase 12-like [Cucurbita pepo subsp. pepo]
MSTRG.11813.1	Cp4.1LG09g10440	trans	transcription factor PAR1-like [Cucumis melo var. makuwa]
MSTRG.11813.1	Cp4.1LG02g07280	trans	probable galacturonosyltransferase-like 1 [Cucurbita pepo subsp. pepo]
MSTRG.11813.1	Cp4.1LG19g10780	trans	BTB/POZ and TAZ domain-containing protein 4-like [Cucurbita pepo subsp. pepo]
MSTRG.11813.1	Cp4.1LG03g08710	trans	uncharacterized protein At3g28850-like [Cucurbita pepo subsp. pepo]
MSTRG.11813.1	Cp4.1LG05g03650	cis	uncharacterized protein LOC111795581 isoform X1 [Cucurbita pepo subsp. pepo]
MSTRG.11813.1	Cp4.1LG18g07190	trans	uncharacterized protein LOC111780695 [Cucurbita pepo subsp. pepo]
MSTRG.11813.1	Cp4.1LG20g01180	trans	heavy metal-associated isoprenylated plant protein 7-like [Cucurbita moschata]
MSTRG.11813.1	Cp4.1LG06g07460	trans	uncharacterized protein LOC111797467 [Cucurbita pepo subsp. pepo]
MSTRG.11813.1	Cp4.1LG20g03500	trans	uncharacterized protein LOC111783515 [Cucurbita pepo subsp. pepo]
MSTRG.11813.1	Cp4.1LG05g02690	cis	60S ribosomal protein L15-2-like [Cucurbita moschata]
MSTRG.11813.1	Cp4.1LG20g07760	trans	protein NUCLEAR FUSION DEFECTIVE 4-like [Cucurbita pepo subsp. pepo]
MSTRG.11813.1	Cp4.1LG00g13290	trans	pentatricopeptide repeat-containing protein At4g20090 [Cucurbita pepo subsp. pepo]
MSTRG.11813.1	Cp4.1LG05g02510	cis	probable sugar phosphate/phosphate translocator At1g12500 [Cucurbita moschata]
MSTRG.11813.1	Cp4.1LG05g00890	trans	homeobox-leucine zipper protein PROTODERMAL FACTOR 2-like [Cucurbita pepo subsp. pepo]
MSTRG.11813.1	Cp4.1LG05g02620	cis	pectinesterase inhibitor 9-like [Cucurbita pepo subsp. pepo]
MSTRG.11813.1	Cp4.1LG00g02080	trans	ethylene-responsive transcription factor 3-like [Cucurbita pepo subsp. pepo]
MSTRG.11813.1	Cp4.1LG18g01580	trans	hypothetical protein E6C27_scaffold601G00030 [Cucumis melo var. makuwa]
MSTRG.11813.1	Cp4.1LG06g02760	trans	protein GLUTAMINE DUMPER 5-like [Cucurbita pepo subsp. pepo]
MSTRG.11813.1	Cp4.1LG00g01640	trans	pentatricopeptide repeat-containing protein At3g46790, chloroplastic-like [Cucurbita pepo subsp. pepo]
MSTRG.11813.1	Cp4.1LG05g03800	cis	uncharacterized protein LOC111794927 [Cucurbita pepo subsp. pepo]
MSTRG.11813.1	Cp4.1LG14g05940	trans	dehydration-responsive element-binding protein 1A-like [Cucurbita pepo subsp. pepo]
MSTRG.11813.1	Cp4.1LG02g08320	trans	WUSCHEL-related homeobox 8-like [Cucurbita pepo subsp. pepo]
MSTRG.11813.1	Cp4.1LG01g15800	trans	uncharacterized protein LOC111781163 [Cucurbita pepo subsp. pepo]
MSTRG.11813.1	Cp4.1LG00g10310	trans	probable glycosyltransferase At5g03795 [Cucurbita pepo subsp. pepo]
MSTRG.11813.1	Cp4.1LG04g05490	trans	oleosin 18.2 kDa-like [Cucurbita pepo subsp. pepo]
MSTRG.11813.1	Cp4.1LG05g02490	cis	DNA mismatch repair protein MSH4-like [Cucurbita pepo subsp. pepo]
MSTRG.11813.1	Cp4.1LG05g03830	cis	protein DETOXIFICATION 56-like [Cucurbita pepo subsp. pepo]
MSTRG.11813.1	Cp4.1LG08g00890	trans	probable WRKY transcription factor 46 [Cucurbita pepo subsp. pepo]
MSTRG.11813.1	Cp4.1LG00g13040	trans	uncharacterized protein LOC111786663 [Cucurbita pepo subsp. pepo]
MSTRG.11813.1	Cp4.1LG08g10340	trans	uncharacterized protein LOC111449572 [Cucurbita moschata]
MSTRG.11813.1	Cp4.1LG14g02890	trans	abscisic acid 8'-hydroxylase 1-like [Cucurbita moschata]
MSTRG.11813.1	Cp4.1LG12g05870	trans	uncharacterized protein LOC111807760 [Cucurbita pepo subsp. pepo]
MSTRG.11813.1	Cp4.1LG04g08100	trans	ethylene-responsive transcription factor 11-like [Cucurbita pepo subsp. pepo]
MSTRG.11813.1	Cp4.1LG08g07290	trans	homeobox-leucine zipper protein HAT4-like [Cucurbita pepo subsp. pepo]
MSTRG.11813.1	Cp4.1LG00g14170	trans	growth-regulating factor 9-like [Cucurbita pepo subsp. pepo]
MSTRG.11813.1	Cp4.1LG16g07480	trans	uncharacterized protein LOC111777222 [Cucurbita pepo subsp. pepo]
MSTRG.11813.1	Cp4.1LG00g09420	trans	probable glycosyltransferase At5g03795 [Cucurbita pepo subsp. pepo]
MSTRG.11813.1	Cp4.1LG17g06970	trans	pectinesterase inhibitor 6 [Cucurbita pepo subsp. pepo]
MSTRG.11813.1	Cp4.1LG05g04030	trans	zinc finger A20 and AN1 domain-containing stress-associated protein 3-like [Cucurbita pepo subsp. pepo]
MSTRG.11813.1	Cp4.1LG05g02520	cis	kinesin-like protein KIN-UA isoform X1 [Cucurbita pepo subsp. pepo]
MSTRG.11813.1	Cp4.1LG05g03940	cis	deoxyribodipyrimidine photo-lyase isoform X2 [Cucurbita maxima]
MSTRG.11813.1	Cp4.1LG13g04860	trans	phosphatidylinositol 4-phosphate 5-kinase 1-like [Cucurbita pepo subsp. pepo]
MSTRG.11813.1	Cp4.1LG09g06890	trans	protein PHLOEM PROTEIN 2-LIKE A9-like [Cucurbita pepo subsp. pepo]
MSTRG.11813.1	Cp4.1LG00g15630	trans	heat stress transcription factor C-1-like [Cucurbita pepo subsp. pepo]
MSTRG.11813.1	Cp4.1LG00g14820	trans	extensin-like [Cucurbita maxima]
MSTRG.11813.1	Cp4.1LG11g04040	trans	truncated transcription factor CAULIFLOWER A-like [Cucurbita pepo subsp. pepo]
MSTRG.11813.1	Cp4.1LG12g01730	trans	EPIDERMAL PATTERNING FACTOR-like protein 5 [Cucumis sativus]
MSTRG.11813.1	Cp4.1LG14g06510	trans	DUF21 domain-containing protein At5g52790 [Cucurbita pepo subsp. pepo]
MSTRG.11813.1	Cp4.1LG05g05280	trans	IQ domain-containing protein IQM2-like [Cucurbita pepo subsp. pepo]
MSTRG.11813.1	Cp4.1LG00g14600	trans	uncharacterized protein LOC111784188 [Cucurbita pepo subsp. pepo]
MSTRG.11813.1	Cp4.1LG05g02730	cis	cucumber peeling cupredoxin-like [Cucurbita maxima]
MSTRG.11813.1	Cp4.1LG05g03740	cis	agamous-like MADS-box protein AGL19 [Cucurbita pepo subsp. pepo]
MSTRG.11813.1	Cp4.1LG05g02540	cis	3-isopropylmalate dehydratase small subunit 3-like [Cucurbita pepo subsp. pepo]
MSTRG.11813.1	Cp4.1LG00g08810	trans	multiple RNA-binding domain-containing protein 1-like, partial [Cucurbita pepo subsp. pepo]
MSTRG.11813.1	Cp4.1LG13g09410	trans	heat shock cognate 70 kDa protein 2-like [Cucurbita pepo subsp. pepo]
MSTRG.11813.1	Cp4.1LG05g02740	cis	stellacyanin-like [Cucurbita pepo subsp. pepo]
MSTRG.11813.1	Cp4.1LG13g00750	trans	ethylene-responsive transcription factor ERF105-like [Cucurbita pepo subsp. pepo]
MSTRG.11813.1	Cp4.1LG05g03690	cis	protein STAY-GREEN, chloroplastic-like [Cucurbita pepo subsp. pepo]
MSTRG.11813.1	Cp4.1LG05g00970	trans	probable indole-3-pyruvate monooxygenase YUCCA8 [Cucurbita pepo subsp. pepo]
MSTRG.11813.1	Cp4.1LG01g15430	trans	F-box/kelch-repeat protein At1g23390 [Cucurbita pepo subsp. pepo]
MSTRG.11813.1	Cp4.1LG01g08750	trans	NAC domain-containing protein 35 [Cucurbita maxima]
MSTRG.11813.1	Cp4.1LG05g03890	cis	protein FIZZY-RELATED 2-like [Cucurbita moschata]
MSTRG.11813.1	Cp4.1LG00g11870	trans	uncharacterized protein LOC111786436 [Cucurbita pepo subsp. pepo]
MSTRG.11813.1	Cp4.1LG08g10230	trans	protein BIC1-like [Cucurbita pepo subsp. pepo]
MSTRG.11813.1	Cp4.1LG05g06140	trans	transcription factor TRY-like [Cucurbita moschata]
MSTRG.11813.1	Cp4.1LG00g14310	trans	uncharacterized protein LOC111792157 [Cucurbita pepo subsp. pepo]
MSTRG.11813.1	Cp4.1LG07g01580	trans	mitochondrial uncoupling protein 4-like [Cucurbita pepo subsp. pepo]
MSTRG.11813.1	Cp4.1LG02g15510	trans	uncharacterized protein LOC105434941 [Cucumis sativus]
MSTRG.11916.1	Cp4.1LG05g03010	cis	ethylene-responsive transcription factor CRF2-like [Cucurbita pepo subsp. pepo]
MSTRG.11916.1	Cp4.1LG05g03060	cis	ubiquitin-conjugating enzyme E2-17 kDa-like [Cucurbita pepo subsp. pepo]
MSTRG.11916.1	Cp4.1LG05g02860	cis	xyloglucan endotransglucosylase/hydrolase protein 31-like [Cucurbita pepo subsp. pepo]
MSTRG.11916.1	Cp4.1LG04g12770	trans	tetraspanin-15-like [Cucurbita moschata]
MSTRG.11916.1	Cp4.1LG05g03220	cis	uncharacterized protein LOC111794996 [Cucurbita pepo subsp. pepo]
MSTRG.11916.1	Cp4.1LG05g03090	cis	probable inactive receptor kinase At4g23740 [Cucurbita pepo subsp. pepo]
MSTRG.11916.1	Cp4.1LG15g00510	trans	PRA1 family protein E-like [Cucurbita pepo subsp. pepo]
MSTRG.11916.1	Cp4.1LG05g02980	cis	arabinogalactan peptide 22-like [Cucurbita maxima]
MSTRG.11916.1	Cp4.1LG05g02800	cis	--
MSTRG.11916.1	Cp4.1LG05g02910	cis	protein UPSTREAM OF FLC-like isoform X1 [Cucurbita pepo subsp. pepo]
MSTRG.11916.1	Cp4.1LG05g02940	cis	PREDICTED: transcription factor FER-LIKE IRON DEFICIENCY-INDUCED TRANSCRIPTION FACTOR isoform X1 [Cucumis melo]
MSTRG.11916.1	Cp4.1LG05g03000	cis	hypothetical protein Csa_000619 [Cucumis sativus]
MSTRG.11916.1	Cp4.1LG05g02890	cis	superoxide dismutase [Cu-Zn], chloroplastic [Cucurbita pepo subsp. pepo]
MSTRG.11916.1	Cp4.1LG14g10000	trans	--
MSTRG.11916.1	Cp4.1LG05g03070	cis	P-loop NTPase domain-containing protein LPA1 homolog 2-like [Cucurbita pepo subsp. pepo]
MSTRG.11916.1	Cp4.1LG05g02950	cis	uncharacterized protein LOC111459627 [Cucurbita moschata]
MSTRG.11916.1	Cp4.1LG05g03050	cis	reticulon-like protein B2 [Cucurbita pepo subsp. pepo]
MSTRG.11916.1	Cp4.1LG05g03210	cis	respiratory burst oxidase homolog protein A-like [Cucurbita pepo subsp. pepo]
MSTRG.11916.1	Cp4.1LG05g02970	cis	uncharacterized protein LOC111794808 [Cucurbita pepo subsp. pepo]
MSTRG.11916.1	Cp4.1LG05g02790	cis	probable glucuronoxylan glucuronosyltransferase IRX7 [Cucurbita pepo subsp. pepo]
MSTRG.11916.1	Cp4.1LG05g02850	cis	SNF1-related protein kinase regulatory subunit beta-3-like [Cucurbita maxima]
MSTRG.11916.1	Cp4.1LG09g03560	trans	apoptosis-inducing factor homolog B-like [Cucurbita pepo subsp. pepo]
MSTRG.11916.1	Cp4.1LG05g02960	cis	protein SPA1-RELATED 2-like isoform X1 [Cucurbita pepo subsp. pepo]
MSTRG.11916.1	Cp4.1LG07g10380	trans	protein phosphatase 1 regulatory inhibitor subunit PPP1R7 homolog isoform X1 [Cucurbita pepo subsp. pepo]
MSTRG.11916.1	Cp4.1LG05g03040	cis	tyrosine-protein kinase ABL1-like [Cucurbita pepo subsp. pepo]
MSTRG.11916.1	Cp4.1LG05g03020	cis	uncharacterized protein At5g41620-like isoform X1 [Cucurbita pepo subsp. pepo]
MSTRG.11916.1	Cp4.1LG05g03080	cis	aluminum-activated malate transporter 9-like [Cucurbita pepo subsp. pepo]
MSTRG.11916.1	Cp4.1LG05g03030	cis	protein trichome birefringence-like 24 [Cucurbita pepo subsp. pepo]
MSTRG.11916.1	Cp4.1LG05g02780	cis	uncharacterized protein LOC111795761 [Cucurbita pepo subsp. pepo]
MSTRG.11916.1	Cp4.1LG05g02920	cis	uncharacterized protein LOC111794782 [Cucurbita pepo subsp. pepo]
MSTRG.11916.1	Cp4.1LG05g02820	cis	heavy metal-associated isoprenylated plant protein 3-like [Cucurbita pepo subsp. pepo]
MSTRG.11916.1	Cp4.1LG05g02930	cis	--
MSTRG.11916.1	Cp4.1LG05g02880	cis	auxin-responsive protein SAUR50-like [Cucurbita pepo subsp. pepo]
MSTRG.11916.1	Cp4.1LG05g02830	cis	UDP-glycosyltransferase 86A2-like [Cucurbita pepo subsp. pepo]
MSTRG.11916.1	Cp4.1LG05g02990	cis	--
MSTRG.11916.1	Cp4.1LG05g02810	cis	ABC transporter F family member 1-like [Cucurbita moschata]
MSTRG.12018.1	Cp4.1LG06g07680	trans	pathogen-related protein-like [Cucurbita pepo subsp. pepo]
MSTRG.12018.1	Cp4.1LG05g04710	cis	dihydropyrimidinase [Cucurbita pepo subsp. pepo]
MSTRG.12018.1	Cp4.1LG05g04750	cis	protein CLT1, chloroplastic [Cucurbita pepo subsp. pepo]
MSTRG.12018.1	Cp4.1LG08g07410	trans	uncharacterized protein LOC111799595 isoform X1 [Cucurbita pepo subsp. pepo]
MSTRG.12018.1	Cp4.1LG02g16130	trans	pectinesterase inhibitor 10 [Cucurbita pepo subsp. pepo]
MSTRG.12018.1	Cp4.1LG05g04790	cis	uncharacterized protein LOC111795401 [Cucurbita pepo subsp. pepo]
MSTRG.12018.1	Cp4.1LG05g04730	cis	splicing factor 3B subunit 6-like protein [Momordica charantia]
MSTRG.12018.1	Cp4.1LG04g00420	trans	probable purine permease 11 [Cucurbita moschata]
MSTRG.12018.1	Cp4.1LG01g01420	trans	uncharacterized protein LOC111801998 [Cucurbita pepo subsp. pepo]
MSTRG.12018.1	Cp4.1LG02g15440	trans	cytochrome P450 705A22-like [Cucurbita pepo subsp. pepo]
MSTRG.12018.1	Cp4.1LG05g04670	cis	PH, RCC1 and FYVE domains-containing protein 1-like [Cucurbita pepo subsp. pepo]
MSTRG.12018.1	Cp4.1LG05g04580	cis	cysteine desulfurase 1, chloroplastic-like [Cucurbita pepo subsp. pepo]
MSTRG.12018.1	Cp4.1LG05g04620	cis	F-box protein At2g32560-like [Cucurbita pepo subsp. pepo]
MSTRG.12018.1	Cp4.1LG06g09490	trans	ethylene-responsive transcription factor ERF110-like [Cucurbita pepo subsp. pepo]
MSTRG.12018.1	Cp4.1LG05g04760	cis	protein LATERAL ROOT PRIMORDIUM 1-like [Cucurbita pepo subsp. pepo]
MSTRG.12018.1	Cp4.1LG05g04660	cis	hypothetical protein Csa_002764 [Cucumis sativus]
MSTRG.12018.1	Cp4.1LG05g04650	cis	molybdopterin synthase catalytic subunit [Cucurbita moschata]
MSTRG.12018.1	Cp4.1LG01g03950	trans	IAA-amino acid hydrolase ILR1-like 1 [Cucurbita pepo subsp. pepo]
MSTRG.12018.1	Cp4.1LG09g10130	trans	transcription factor MYB86-like [Cucurbita pepo subsp. pepo]
MSTRG.12018.1	Cp4.1LG02g01060	trans	putative RING-H2 finger protein ATL62 [Cucurbita pepo subsp. pepo]
MSTRG.12018.1	Cp4.1LG12g10990	trans	NAC domain-containing protein 21/22-like [Cucurbita pepo subsp. pepo]
MSTRG.12018.1	Cp4.1LG02g02960	trans	uncharacterized protein LOC111480806 isoform X1 [Cucurbita maxima]
MSTRG.12018.1	Cp4.1LG08g12420	trans	probable 2-oxoglutarate-dependent dioxygenase ANS [Cucurbita pepo subsp. pepo]
MSTRG.12018.1	Cp4.1LG05g05220	trans	linoleate 13S-lipoxygenase 2-1, chloroplastic-like [Cucurbita pepo subsp. pepo]
MSTRG.12018.1	Cp4.1LG05g04610	cis	fasciclin-like arabinogalactan protein 17 [Cucurbita pepo subsp. pepo]
MSTRG.12018.1	Cp4.1LG05g04720	cis	uncharacterized protein LOC111796146 [Cucurbita pepo subsp. pepo]
MSTRG.12018.1	Cp4.1LG03g11400	trans	uncharacterized protein LOC111791384 isoform X1 [Cucurbita pepo subsp. pepo]
MSTRG.12018.1	Cp4.1LG05g04630	cis	putative axial regulator YABBY 2 isoform X1 [Cucurbita pepo subsp. pepo]
MSTRG.12018.1	Cp4.1LG05g04570	cis	uncharacterized protein LOC111794813 [Cucurbita pepo subsp. pepo]
MSTRG.12018.1	Cp4.1LG05g04560	cis	nuclear pore complex protein NUP96 [Cucurbita pepo subsp. pepo]
MSTRG.12018.1	Cp4.1LG05g04700	cis	uncharacterized protein LOC111795818 isoform X1 [Cucurbita pepo subsp. pepo]
MSTRG.12018.1	Cp4.1LG14g03560	trans	protein ROOT INITIATION DEFECTIVE 3-like [Cucurbita pepo subsp. pepo]
MSTRG.12018.1	Cp4.1LG14g08340	trans	ethylene-responsive transcription factor ERF027-like [Cucurbita pepo subsp. pepo]
MSTRG.12018.1	Cp4.1LG07g04180	trans	CBS domain-containing protein CBSX3, mitochondrial-like [Cucurbita pepo subsp. pepo]
MSTRG.12018.1	Cp4.1LG09g03430	trans	ethylene-responsive transcription factor WRI1-like [Cucurbita pepo subsp. pepo]
MSTRG.12018.1	Cp4.1LG19g04900	trans	transcription repressor OFP6-like isoform X1 [Cucurbita pepo subsp. pepo]
MSTRG.12018.1	Cp4.1LG05g04550	cis	protein DGS1, mitochondrial-like isoform X1 [Cucurbita pepo subsp. pepo]
MSTRG.12018.1	Cp4.1LG06g04790	trans	rust resistance kinase Lr10-like [Cucurbita pepo subsp. pepo]
MSTRG.12018.1	Cp4.1LG05g04770	cis	uncharacterized protein LOC111795041 [Cucurbita pepo subsp. pepo]
MSTRG.12018.1	Cp4.1LG05g04540	cis	cucumber peeling cupredoxin-like [Cucurbita moschata]
MSTRG.12018.1	Cp4.1LG03g10470	trans	serine/threonine-protein kinase STY46-like [Cucurbita pepo subsp. pepo]
MSTRG.12018.1	Cp4.1LG02g14320	trans	IAA-amino acid hydrolase ILR1-like 4 [Cucurbita pepo subsp. pepo]
MSTRG.12018.1	Cp4.1LG05g04800	cis	rhodanese-like/PpiC domain-containing protein 12, chloroplastic isoform X1 [Cucurbita pepo subsp. pepo]
MSTRG.12018.1	Cp4.1LG05g04600	cis	ubiquitin carboxyl-terminal hydrolase 8-like [Cucurbita pepo subsp. pepo]
MSTRG.12018.1	Cp4.1LG05g04780	cis	calcium-dependent protein kinase 34 [Cucurbita pepo subsp. pepo]
MSTRG.12018.1	Cp4.1LG10g04850	trans	Aquaporin-like protein [Gossypium australe]
MSTRG.12018.1	Cp4.1LG11g01710	trans	allene oxide synthase 1, chloroplastic-like [Cucurbita pepo subsp. pepo]
MSTRG.12018.1	Cp4.1LG05g04640	cis	hydroxymethylglutaryl-CoA lyase, mitochondrial-like isoform X1 [Cucurbita pepo subsp. pepo]
MSTRG.12018.1	Cp4.1LG01g08040	trans	uncharacterized protein LOC105435072 [Cucumis sativus]
MSTRG.12018.1	Cp4.1LG05g04470	cis	uncharacterized protein LOC111794350 [Cucurbita pepo subsp. pepo]
MSTRG.12018.1	Cp4.1LG02g07780	trans	bZIP transcription factor 11-like [Cucurbita pepo subsp. pepo]
MSTRG.12018.1	Cp4.1LG05g04590	cis	replication factor C subunit 1 isoform X1 [Cucurbita pepo subsp. pepo]
MSTRG.12018.1	Cp4.1LG11g09140	trans	pentatricopeptide repeat-containing protein At3g05340-like isoform X1 [Cucurbita pepo subsp. pepo]
MSTRG.12018.1	Cp4.1LG05g04740	cis	--
MSTRG.12018.1	Cp4.1LG05g04690	cis	E3 ubiquitin-protein ligase KEG-like [Cucurbita pepo subsp. pepo]
MSTRG.12060.1	Cp4.1LG05g04890	cis	heterogeneous nuclear ribonucleoprotein F-like [Cucurbita pepo subsp. pepo]
MSTRG.12060.1	Cp4.1LG05g05140	cis	DNA topoisomerase 6 subunit B isoform X1 [Cucurbita pepo subsp. pepo]
MSTRG.12060.1	Cp4.1LG05g05070	cis	zinc transporter ZTP29-like isoform X1 [Cucurbita pepo subsp. pepo]
MSTRG.12060.1	Cp4.1LG05g05060	cis	protein DETOXIFICATION 42-like [Cucurbita pepo subsp. pepo]
MSTRG.12060.1	Cp4.1LG05g05050	cis	DNA damage-repair/toleration protein DRT100-like [Cucurbita pepo subsp. pepo]
MSTRG.12060.1	Cp4.1LG05g04960	cis	nuclear transcription factor Y subunit A-1-like [Cucurbita pepo subsp. pepo]
MSTRG.12060.1	Cp4.1LG05g04950	cis	calcium-dependent protein kinase 8-like [Cucurbita pepo subsp. pepo]
MSTRG.12060.1	Cp4.1LG05g05200	cis	enoyl-[acyl-carrier-protein] reductase [NADH], chloroplastic-like [Cucurbita moschata]
MSTRG.12060.1	Cp4.1LG05g05010	cis	uncharacterized protein LOC111794736 [Cucurbita pepo subsp. pepo]
MSTRG.12060.1	Cp4.1LG05g05030	cis	zinc finger A20 and AN1 domain-containing stress-associated protein 8-like [Cucurbita maxima]
MSTRG.12060.1	Cp4.1LG05g05090	cis	PREDICTED: histone H3.2-like [Tarenaya hassleriana]
MSTRG.12060.1	Cp4.1LG05g05110	cis	nascent polypeptide-associated complex subunit alpha, muscle-specific form-like [Cucurbita pepo subsp. pepo]
MSTRG.12060.1	Cp4.1LG05g05130	cis	delta(12)-oleate desaturase-like [Cucurbita moschata]
MSTRG.12060.1	Cp4.1LG05g05000	cis	aldehyde dehydrogenase family 3 member F1-like [Cucurbita pepo subsp. pepo]
MSTRG.12060.1	Cp4.1LG11g02480	trans	WEB family protein At1g75720-like [Cucurbita pepo subsp. pepo]
MSTRG.12060.1	Cp4.1LG05g04880	cis	cyclin-dependent protein kinase inhibitor SMR13-like [Cucurbita pepo subsp. pepo]
MSTRG.12060.1	Cp4.1LG05g05100	cis	uncharacterized protein LOC111795758 [Cucurbita pepo subsp. pepo]
MSTRG.12060.1	Cp4.1LG05g04830	cis	chaperonin-like RbcX protein 2, chloroplastic [Cucurbita pepo subsp. pepo]
MSTRG.12060.1	Cp4.1LG05g05080	cis	E3 ubiquitin ligase BIG BROTHER-like [Cucurbita pepo subsp. pepo]
MSTRG.12060.1	Cp4.1LG05g04990	cis	uncharacterized protein LOC111795710 isoform X1 [Cucurbita pepo subsp. pepo]
MSTRG.12060.1	Cp4.1LG05g05180	cis	uncharacterized protein LOC111794599 [Cucurbita pepo subsp. pepo]
MSTRG.12060.1	Cp4.1LG05g05040	cis	dicarboxylate transporter 1, chloroplastic-like [Cucurbita pepo subsp. pepo]
MSTRG.12060.1	Cp4.1LG05g04920	cis	hypothetical protein CUMW_101920 [Citrus unshiu]
MSTRG.12060.1	Cp4.1LG05g04810	cis	hypothetical protein [Cucumis melo subsp. melo]
MSTRG.12060.1	Cp4.1LG05g05120	cis	IRK-interacting protein [Cucurbita pepo subsp. pepo]
MSTRG.12060.1	Cp4.1LG05g04980	cis	uncharacterized protein LOC111795011 [Cucurbita pepo subsp. pepo]
MSTRG.12060.1	Cp4.1LG05g05160	cis	uncharacterized protein LOC111459301 [Cucurbita moschata]
MSTRG.12060.1	Cp4.1LG05g05150	cis	eukaryotic translation initiation factor 5B-like [Cucurbita moschata]
MSTRG.12060.1	Cp4.1LG05g05020	cis	outer envelope protein 80, chloroplastic [Cucurbita pepo subsp. pepo]
MSTRG.12060.1	Cp4.1LG05g04900	cis	cinnamoyl-CoA reductase 1-like [Cucurbita pepo subsp. pepo]
MSTRG.12060.1	Cp4.1LG05g04970	cis	serine/threonine-protein kinase UCN-like [Cucurbita pepo subsp. pepo]
MSTRG.12060.1	Cp4.1LG05g05220	cis	linoleate 13S-lipoxygenase 2-1, chloroplastic-like [Cucurbita pepo subsp. pepo]
MSTRG.12138.2	Cp4.1LG19g08660	trans	peroxidase 64-like [Cucurbita pepo subsp. pepo]
MSTRG.12138.2	Cp4.1LG05g05960	cis	cytochrome b5-like [Cucurbita maxima]
MSTRG.12138.2	Cp4.1LG05g05730	cis	uncharacterized protein LOC111459161 [Cucurbita moschata]
MSTRG.12138.2	Cp4.1LG05g05930	cis	glucan endo-1,3-beta-glucosidase-like [Cucurbita pepo subsp. pepo]
MSTRG.12138.2	Cp4.1LG05g05870	cis	ATPase family AAA domain-containing protein 1 [Cucurbita moschata]
MSTRG.12138.2	Cp4.1LG05g05830	cis	GTPase-activating protein gyp7-like [Cucurbita pepo subsp. pepo]
MSTRG.12138.2	Cp4.1LG05g05660	cis	uncharacterized protein LOC111459803 [Cucurbita moschata]
MSTRG.12138.2	Cp4.1LG05g05860	cis	histone-lysine N-methyltransferase ATXR6-like [Cucurbita pepo subsp. pepo]
MSTRG.12138.2	Cp4.1LG05g05680	cis	pyruvate kinase, cytosolic isozyme [Cucurbita pepo subsp. pepo]
MSTRG.12138.2	Cp4.1LG05g05840	cis	uncharacterized protein LOC111794607 [Cucurbita pepo subsp. pepo]
MSTRG.12138.2	Cp4.1LG05g05760	cis	uncharacterized protein LOC111795329 isoform X1 [Cucurbita pepo subsp. pepo]
MSTRG.12138.2	Cp4.1LG05g05620	cis	mediator of RNA polymerase II transcription subunit 21 [Cucurbita pepo subsp. pepo]
MSTRG.12138.2	Cp4.1LG17g00150	trans	huntingtin-interacting protein K-like [Cucurbita pepo subsp. pepo]
MSTRG.12138.2	Cp4.1LG05g05560	cis	lysine--tRNA ligase, chloroplastic/mitochondrial [Cucurbita pepo subsp. pepo]
MSTRG.12138.2	Cp4.1LG05g05710	cis	protein RESPONSE TO LOW SULFUR 2-like [Cucurbita pepo subsp. pepo]
MSTRG.12138.2	Cp4.1LG05g05970	cis	uncharacterized protein LOC111459420 [Cucurbita moschata]
MSTRG.12138.2	Cp4.1LG05g05750	cis	two-component response regulator-like APRR9 isoform X1 [Cucurbita pepo subsp. pepo]
MSTRG.12138.2	Cp4.1LG05g05780	cis	uncharacterized protein LOC111795446 isoform X1 [Cucurbita pepo subsp. pepo]
MSTRG.12138.2	Cp4.1LG05g05850	cis	probable 6-phosphogluconolactonase 4, chloroplastic [Cucurbita pepo subsp. pepo]
MSTRG.12138.2	Cp4.1LG05g05810	cis	hypothetical protein Csa_000428 [Cucumis sativus]
MSTRG.12138.2	Cp4.1LG05g05790	cis	E3 ubiquitin-protein ligase SIRP1-like [Cucurbita pepo subsp. pepo]
MSTRG.12138.2	Cp4.1LG05g01650	trans	uncharacterized protein LOC111795871 [Cucurbita pepo subsp. pepo]
MSTRG.12138.2	Cp4.1LG05g05640	cis	protein MET1, chloroplastic [Cucurbita pepo subsp. pepo]
MSTRG.12138.2	Cp4.1LG05g05800	cis	uncharacterized protein LOC111809395 [Cucurbita pepo subsp. pepo]
MSTRG.12138.2	Cp4.1LG05g05700	cis	uncharacterized protein LOC111796198 [Cucurbita pepo subsp. pepo]
MSTRG.12138.2	Cp4.1LG05g05570	cis	glucosidase 2 subunit beta isoform X1 [Cucurbita pepo subsp. pepo]
MSTRG.12138.2	Cp4.1LG05g05920	cis	molybdate-anion transporter [Cucurbita pepo subsp. pepo]
MSTRG.12138.2	Cp4.1LG05g05720	cis	CDPK-related kinase 6-like [Cucurbita pepo subsp. pepo]
MSTRG.12138.2	Cp4.1LG05g05770	cis	serine/arginine-rich splicing factor SR34A-like [Cucurbita moschata]
MSTRG.12138.2	Cp4.1LG07g01100	trans	uncharacterized protein LOC111798675 isoform X1 [Cucurbita pepo subsp. pepo]
MSTRG.12138.2	Cp4.1LG05g05940	cis	protein yippee-like At4g27745 [Cucurbita moschata]
MSTRG.12138.2	Cp4.1LG11g08770	trans	solute carrier family 40 member 3, chloroplastic-like [Cucurbita pepo subsp. pepo]
MSTRG.12138.2	Cp4.1LG05g05690	cis	membrane-bound transcription factor site-2 protease homolog [Cucurbita pepo subsp. pepo]
MSTRG.12138.2	Cp4.1LG01g02980	trans	uncharacterized protein At3g49720-like [Cucurbita pepo subsp. pepo]
MSTRG.12138.2	Cp4.1LG05g05670	cis	NPL4-like protein 1 [Cucurbita moschata]
MSTRG.12138.2	Cp4.1LG01g17200	trans	mitotic spindle checkpoint protein MAD1 [Cucurbita pepo subsp. pepo]
MSTRG.12138.2	Cp4.1LG05g05900	cis	WD repeat-containing protein 44-like isoform X1 [Cucurbita pepo subsp. pepo]
MSTRG.12138.2	Cp4.1LG05g05740	cis	nascent polypeptide-associated complex subunit alpha-like protein 2 [Cucurbita moschata]
MSTRG.12173.1	Cp4.1LG05g05880	cis	uncharacterized protein LOC111025715 isoform X3 [Momordica charantia]
MSTRG.12173.1	Cp4.1LG05g05930	cis	glucan endo-1,3-beta-glucosidase-like [Cucurbita pepo subsp. pepo]
MSTRG.12173.1	Cp4.1LG05g05910	cis	uncharacterized protein LOC111794595 [Cucurbita pepo subsp. pepo]
MSTRG.12173.1	Cp4.1LG05g05990	cis	abscisic acid receptor PYL8-like [Cucurbita moschata]
MSTRG.12173.1	Cp4.1LG05g06200	cis	ATP-dependent zinc metalloprotease FTSH 11, chloroplastic/mitochondrial-like [Cucurbita pepo subsp. pepo]
MSTRG.12173.1	Cp4.1LG05g05950	cis	uncharacterized protein LOC111459477 [Cucurbita moschata]
MSTRG.12173.1	Cp4.1LG02g02330	trans	uncharacterized protein LOC111787988 [Cucurbita pepo subsp. pepo]
MSTRG.12173.1	Cp4.1LG05g06170	cis	uncharacterized protein LOC111490949 [Cucurbita maxima]
MSTRG.12173.1	Cp4.1LG05g06240	cis	ethylene-responsive transcription factor CRF2-like [Cucurbita pepo subsp. pepo]
MSTRG.12173.1	Cp4.1LG05g05980	cis	succinate dehydrogenase assembly factor 4, mitochondrial [Cucurbita pepo subsp. pepo]
MSTRG.12173.1	Cp4.1LG05g06040	cis	two-component response regulator-like PRR37 [Cucurbita pepo subsp. pepo]
MSTRG.12173.1	Cp4.1LG05g06000	cis	protein DEFECTIVE IN MERISTEM SILENCING 3-like isoform X1 [Cucurbita pepo subsp. pepo]
MSTRG.12173.1	Cp4.1LG05g06220	cis	mitochondrial carrier protein MTM1-like isoform X2 [Cucurbita moschata]
MSTRG.12173.1	Cp4.1LG05g06130	cis	putative pentatricopeptide repeat-containing protein At5g59200, chloroplastic [Cucurbita pepo subsp. pepo]
MSTRG.12173.1	Cp4.1LG05g05820	cis	uncharacterized protein LOC111794566 [Cucurbita pepo subsp. pepo]
MSTRG.12173.1	Cp4.1LG05g06070	cis	probable pectinesterase/pectinesterase inhibitor 61 [Cucurbita pepo subsp. pepo]
MSTRG.12173.1	Cp4.1LG05g06020	cis	uncharacterized protein LOC111794965 [Cucurbita pepo subsp. pepo]
MSTRG.12173.1	Cp4.1LG05g06030	cis	protein BOBBER 1-like [Cucurbita pepo subsp. pepo]
MSTRG.12173.1	Cp4.1LG05g06080	cis	cyclic nucleotide-gated ion channel 1 isoform X1 [Cucurbita pepo subsp. pepo]
MSTRG.12173.1	Cp4.1LG05g05890	cis	nephrocystin-3-like isoform X1 [Cucurbita pepo subsp. pepo]
MSTRG.12173.1	Cp4.1LG05g06010	cis	spermine synthase-like isoform X4 [Cucurbita pepo subsp. pepo]
MSTRG.12173.1	Cp4.1LG05g06050	cis	uncharacterized protein LOC111796209 [Cucurbita pepo subsp. pepo]
MSTRG.12173.1	Cp4.1LG05g06230	cis	bidirectional sugar transporter SWEET3b-like [Cucurbita pepo subsp. pepo]
MSTRG.12173.1	Cp4.1LG05g06090	cis	uncharacterized protein LOC111794890 [Cucurbita pepo subsp. pepo]
MSTRG.12173.1	Cp4.1LG05g05970	cis	uncharacterized protein LOC111459420 [Cucurbita moschata]
MSTRG.12173.1	Cp4.1LG05g06140	cis	transcription factor TRY-like [Cucurbita moschata]
MSTRG.12173.1	Cp4.1LG03g10840	trans	G-type lectin S-receptor-like serine/threonine-protein kinase LECRK2 [Cucurbita pepo subsp. pepo]
MSTRG.12173.1	Cp4.1LG05g05900	cis	WD repeat-containing protein 44-like isoform X1 [Cucurbita pepo subsp. pepo]
MSTRG.12173.1	Cp4.1LG05g06110	cis	DEAD-box ATP-dependent RNA helicase 10-like [Cucurbita pepo subsp. pepo]
MSTRG.12173.1	Cp4.1LG05g06210	cis	polypyrimidine tract-binding protein homolog 2-like isoform X1 [Cucurbita maxima]
MSTRG.12173.1	Cp4.1LG05g06190	cis	hypothetical protein D5086_0000014670 [Populus alba]
MSTRG.12173.1	Cp4.1LG05g06100	cis	probable inactive receptor kinase At4g23740 [Cucurbita pepo subsp. pepo]
MSTRG.12173.1	Cp4.1LG05g06160	cis	uncharacterized protein LOC111796216 [Cucurbita pepo subsp. pepo]
MSTRG.12173.1	Cp4.1LG05g06060	cis	protein IQ-DOMAIN 1-like [Cucurbita pepo subsp. pepo]
MSTRG.12173.1	Cp4.1LG05g06180	cis	myosin IB heavy chain-like [Cucurbita pepo subsp. pepo]
MSTRG.12356.1	Cp4.1LG10g10950	trans	probable zinc metalloprotease EGY1, chloroplastic [Cucurbita pepo subsp. pepo]
MSTRG.12356.1	Cp4.1LG05g07680	cis	uncharacterized protein LOC111796027 isoform X1 [Cucurbita pepo subsp. pepo]
MSTRG.12356.1	Cp4.1LG04g10720	trans	glutamate-rich WD repeat-containing protein 1 [Cucurbita pepo subsp. pepo]
MSTRG.12356.1	Cp4.1LG01g19700	trans	protein REVEILLE 1-like isoform X1 [Cucurbita pepo subsp. pepo]
MSTRG.12356.1	Cp4.1LG20g00260	trans	cyclic dof factor 3-like [Cucurbita pepo subsp. pepo]
MSTRG.12356.1	Cp4.1LG18g02620	trans	proteinaceous RNase P 1, chloroplastic/mitochondrial [Cucurbita pepo subsp. pepo]
MSTRG.12356.1	Cp4.1LG08g02780	trans	protein PHR1-LIKE 2-like [Cucurbita pepo subsp. pepo]
MSTRG.12356.1	Cp4.1LG01g06050	trans	protein VAC14 homolog [Cucurbita pepo subsp. pepo]
MSTRG.12356.1	Cp4.1LG05g07850	cis	uncharacterized protein At4g10930 isoform X1 [Cucurbita pepo subsp. pepo]
MSTRG.12356.1	Cp4.1LG16g04260	trans	uncharacterized protein LOC111448399 [Cucurbita moschata]
MSTRG.12356.1	Cp4.1LG05g07780	cis	oligopeptide transporter 7 isoform X1 [Cucurbita pepo subsp. pepo]
MSTRG.12356.1	Cp4.1LG05g14260	trans	protein NRT1/ PTR FAMILY 6.4-like [Cucurbita pepo subsp. pepo]
MSTRG.12356.1	Cp4.1LG05g07790	cis	GDSL esterase/lipase At4g10955 [Cucurbita maxima]
MSTRG.12356.1	Cp4.1LG01g13500	trans	protein CHUP1, chloroplastic-like [Cucurbita moschata]
MSTRG.12356.1	Cp4.1LG09g07950	trans	hypothetical protein E6C27_scaffold46G004570 [Cucumis melo var. makuwa]
MSTRG.12356.1	Cp4.1LG05g07940	cis	--
MSTRG.12356.1	Cp4.1LG05g07730	cis	alcohol dehydrogenase-like 4 [Cucurbita pepo subsp. pepo]
MSTRG.12356.1	Cp4.1LG05g07670	cis	UPF0160 protein [Cucurbita pepo subsp. pepo]
MSTRG.12356.1	Cp4.1LG05g07510	cis	mitochondrial import inner membrane translocase subunit Tim13-like [Cucurbita moschata]
MSTRG.12356.1	Cp4.1LG05g11650	trans	histone-lysine N-methyltransferase CLF-like [Cucurbita pepo subsp. pepo]
MSTRG.12356.1	Cp4.1LG04g07560	trans	cysteine-rich and transmembrane domain-containing protein WIH2-like [Cucurbita pepo subsp. pepo]
MSTRG.12356.1	Cp4.1LG04g15880	trans	28 kDa ribonucleoprotein, chloroplastic [Cucurbita pepo subsp. pepo]
MSTRG.12356.1	Cp4.1LG05g07720	cis	ubiquitin carboxyl-terminal hydrolase 9-like isoform X2 [Cucurbita moschata]
MSTRG.12356.1	Cp4.1LG13g02570	trans	SKP1-like protein 21 isoform X1 [Cucurbita moschata]
MSTRG.12356.1	Cp4.1LG03g02960	trans	26S proteasome non-ATPase regulatory subunit 7 homolog A-like [Cucurbita moschata]
MSTRG.12356.1	Cp4.1LG12g05510	trans	DNA mismatch repair protein PMS1 [Cucumis melo var. makuwa]
MSTRG.12356.1	Cp4.1LG02g12750	trans	uncharacterized protein LOC111787791 [Cucurbita pepo subsp. pepo]
MSTRG.12356.1	Cp4.1LG05g07900	cis	plant UBX domain-containing protein 10-like [Cucurbita pepo subsp. pepo]
MSTRG.12356.1	Cp4.1LG08g11750	trans	fructokinase-like 1, chloroplastic [Cucurbita pepo subsp. pepo]
MSTRG.12356.1	Cp4.1LG01g21130	trans	--
MSTRG.12356.1	Cp4.1LG18g03210	trans	E3 ubiquitin-protein ligase EL5-like [Cucurbita pepo subsp. pepo]
MSTRG.12356.1	Cp4.1LG05g07800	cis	WD repeat-containing protein 44-like [Cucurbita pepo subsp. pepo]
MSTRG.12356.1	Cp4.1LG17g04540	trans	7-dehydrocholesterol reductase [Cucurbita pepo subsp. pepo]
MSTRG.12356.1	Cp4.1LG03g01620	trans	cell division control protein 48 homolog E [Cucurbita moschata]
MSTRG.12356.1	Cp4.1LG05g07860	cis	uncharacterized protein LOC111796047 [Cucurbita pepo subsp. pepo]
MSTRG.12356.1	Cp4.1LG14g07460	trans	cell division protein FtsZ homolog 1, chloroplastic-like [Cucurbita pepo subsp. pepo]
MSTRG.12356.1	Cp4.1LG16g04960	trans	uncharacterized protein LOC111777872 [Cucurbita pepo subsp. pepo]
MSTRG.12356.1	Cp4.1LG04g13430	trans	uncharacterized protein LOC111793929 [Cucurbita pepo subsp. pepo]
MSTRG.12356.1	Cp4.1LG05g07920	cis	methyltransferase-like protein 17, mitochondrial [Cucurbita pepo subsp. pepo]
MSTRG.12356.1	Cp4.1LG05g07740	cis	protein BRANCHLESS TRICHOME-like [Cucurbita pepo subsp. pepo]
MSTRG.12356.1	Cp4.1LG10g06630	trans	phenylalanine--tRNA ligase, chloroplastic/mitochondrial-like isoform X1 [Cucurbita pepo subsp. pepo]
MSTRG.12356.1	Cp4.1LG05g07650	cis	uncharacterized protein LOC111795033 [Cucurbita pepo subsp. pepo]
MSTRG.12356.1	Cp4.1LG05g07750	cis	serine/threonine-protein kinase WNK8-like isoform X1 [Cucurbita pepo subsp. pepo]
MSTRG.12356.1	Cp4.1LG02g08370	trans	coiled-coil domain-containing protein 115 [Cucurbita pepo subsp. pepo]
MSTRG.12356.1	Cp4.1LG05g07520	cis	heavy metal-associated isoprenylated plant protein 30-like [Cucurbita pepo subsp. pepo]
MSTRG.12356.1	Cp4.1LG13g01970	trans	uncharacterized protein At4g22758 [Cucurbita pepo subsp. pepo]
MSTRG.12356.1	Cp4.1LG05g07760	cis	metal-nicotianamine transporter YSL1 isoform X1 [Cucurbita pepo subsp. pepo]
MSTRG.12356.1	Cp4.1LG05g07660	cis	NAC domain-containing protein 12-like [Cucurbita pepo subsp. pepo]
MSTRG.12356.1	Cp4.1LG20g00380	trans	NAC domain-containing protein 100-like [Cucurbita pepo subsp. pepo]
MSTRG.12356.1	Cp4.1LG14g09050	trans	novel plant SNARE 11-like [Cucurbita pepo subsp. pepo]
MSTRG.12356.1	Cp4.1LG00g01730	trans	uncharacterized protein LOC111784120 [Cucurbita pepo subsp. pepo]
MSTRG.12356.1	Cp4.1LG05g07770	cis	LOW QUALITY PROTEIN: embryogenesis-associated protein EMB8-like [Cucurbita pepo subsp. pepo]
MSTRG.12356.1	Cp4.1LG05g07600	cis	putative alpha-L-fucosidase 1 [Cucurbita pepo subsp. pepo]
MSTRG.12356.1	Cp4.1LG05g07700	cis	uncharacterized protein LOC111795986 [Cucurbita pepo subsp. pepo]
MSTRG.12356.1	Cp4.1LG05g07690	cis	granule-bound starch synthase 1, chloroplastic/amyloplastic-like [Cucurbita pepo subsp. pepo]
MSTRG.12356.1	Cp4.1LG03g12560	trans	uncharacterized protein At3g49140-like isoform X2 [Cucurbita pepo subsp. pepo]
MSTRG.12356.1	Cp4.1LG01g05970	trans	uncharacterized aarF domain-containing protein kinase At5g05200, chloroplastic [Cucurbita maxima]
MSTRG.12356.1	Cp4.1LG18g03710	trans	uncharacterized protein LOC111780172 [Cucurbita pepo subsp. pepo]
MSTRG.12356.1	Cp4.1LG10g00300	trans	proteasome subunit alpha type-7-like [Cucurbita moschata]
MSTRG.12356.1	Cp4.1LG13g02180	trans	acid beta-fructofuranosidase [Cucurbita pepo subsp. pepo]
MSTRG.12356.1	Cp4.1LG02g13720	trans	chloroplastic group IIB intron splicing facilitator CRS2-B, chloroplastic-like [Cucurbita pepo subsp. pepo]
MSTRG.12356.1	Cp4.1LG05g10960	trans	26S proteasome non-ATPase regulatory subunit 12 homolog A-like [Cucurbita maxima]
MSTRG.12356.1	Cp4.1LG05g07640	cis	probable lysophospholipase BODYGUARD 3 [Cucurbita pepo subsp. pepo]
MSTRG.12356.1	Cp4.1LG05g07630	cis	uncharacterized protein LOC111435756 [Cucurbita moschata]
MSTRG.12356.1	Cp4.1LG04g14260	trans	probable acyl-activating enzyme 17, peroxisomal [Cucurbita pepo subsp. pepo]
MSTRG.12356.1	Cp4.1LG00g14430	trans	probable glucuronoxylan glucuronosyltransferase F8H [Cucurbita pepo subsp. pepo]
MSTRG.12356.1	Cp4.1LG09g06200	trans	putative leucine-rich repeat-containing protein DDB_G0290503 isoform X1 [Cucurbita pepo subsp. pepo]
MSTRG.12356.1	Cp4.1LG03g09230	trans	glucan endo-1,3-beta-glucosidase 8-like isoform X1 [Cucurbita pepo subsp. pepo]
MSTRG.12356.1	Cp4.1LG07g05110	trans	long chain base biosynthesis protein 1-like [Cucurbita pepo subsp. pepo]
MSTRG.12356.1	Cp4.1LG05g07570	cis	metal tolerance protein 1-like [Cucurbita pepo subsp. pepo]
MSTRG.12356.1	Cp4.1LG05g07620	cis	WAT1-related protein At3g30340-like [Cucurbita pepo subsp. pepo]
MSTRG.12356.1	Cp4.1LG13g02450	trans	putative disease resistance protein At4g19050 [Cucurbita pepo subsp. pepo]
MSTRG.12356.1	Cp4.1LG20g01770	trans	nascent polypeptide-associated complex subunit beta-like [Cucurbita pepo subsp. pepo]
MSTRG.12356.1	Cp4.1LG01g23410	trans	sirohydrochlorin ferrochelatase, chloroplastic-like [Cucurbita pepo subsp. pepo]
MSTRG.12356.1	Cp4.1LG19g01970	trans	protein NDH-DEPENDENT CYCLIC ELECTRON FLOW 5 [Cucurbita pepo subsp. pepo]
MSTRG.12356.1	Cp4.1LG20g00900	trans	uncharacterized protein LOC111783675 isoform X1 [Cucurbita pepo subsp. pepo]
MSTRG.12356.1	Cp4.1LG02g02730	trans	LRR receptor-like serine/threonine-protein kinase FEI 2 [Cucurbita pepo subsp. pepo]
MSTRG.12356.1	Cp4.1LG01g15140	trans	serine/arginine-rich splicing factor RSZ21 isoform X1 [Cucumis melo var. makuwa]
MSTRG.12356.1	Cp4.1LG09g04660	trans	katanin p80 WD40 repeat-containing subunit B1 homolog [Cucurbita pepo subsp. pepo]
MSTRG.12356.1	Cp4.1LG08g11710	trans	uncharacterized protein LOC111799525 [Cucurbita pepo subsp. pepo]
MSTRG.12356.1	Cp4.1LG05g07710	cis	beta-1,6-galactosyltransferase GALT31A-like isoform X1 [Cucurbita pepo subsp. pepo]
MSTRG.12356.1	Cp4.1LG01g09750	trans	retinoblastoma-related protein-like [Cucurbita pepo subsp. pepo]
MSTRG.12356.1	Cp4.1LG14g01970	trans	probable serine protease EDA2 isoform X2 [Cucurbita pepo subsp. pepo]
MSTRG.12356.1	Cp4.1LG01g06080	trans	microtubule-associated protein 70-1-like [Cucurbita pepo subsp. pepo]
MSTRG.12356.1	Cp4.1LG03g05070	trans	ATP-dependent Clp protease proteolytic subunit 5, chloroplastic-like [Cucurbita pepo subsp. pepo]
MSTRG.12356.1	Cp4.1LG11g10370	trans	110 kDa U5 small nuclear ribonucleoprotein component CLO [Cucurbita pepo subsp. pepo]
MSTRG.12356.1	Cp4.1LG05g07910	cis	UDP-glucose 4-epimerase GEPI48-like [Cucurbita pepo subsp. pepo]
MSTRG.12356.1	Cp4.1LG10g09500	trans	cysteine-rich receptor-like protein kinase 29 [Cucurbita pepo subsp. pepo]
MSTRG.12356.1	Cp4.1LG20g04620	trans	glycogen phosphorylase 1-like [Cucurbita pepo subsp. pepo]
MSTRG.12356.1	Cp4.1LG05g07830	cis	cytochrome b561 and DOMON domain-containing protein At3g61750-like [Cucurbita pepo subsp. pepo]
MSTRG.12356.1	Cp4.1LG14g07950	trans	probable L-type lectin-domain containing receptor kinase S.7 [Cucurbita maxima]
MSTRG.12356.1	Cp4.1LG08g13280	trans	squamous cell carcinoma antigen recognized by T-cells 3 isoform X1 [Cucurbita pepo subsp. pepo]
MSTRG.12356.1	Cp4.1LG02g10220	trans	NAP1-related protein 2-like [Cucurbita moschata]
MSTRG.12598.12	Cp4.1LG05g09880	cis	GDSL esterase/lipase At2g30310-like [Cucurbita pepo subsp. pepo]
MSTRG.12598.12	Cp4.1LG19g05450	trans	protein LIGHT-DEPENDENT SHORT HYPOCOTYLS 4-like [Cucurbita pepo subsp. pepo]
MSTRG.12598.12	Cp4.1LG08g01850	trans	uncharacterized protein LOC111800502 [Cucurbita pepo subsp. pepo]
MSTRG.12598.12	Cp4.1LG05g09890	cis	N-terminal acetyltransferase B complex auxiliary subunit NAA25-like [Cucurbita pepo subsp. pepo]
MSTRG.12598.12	Cp4.1LG05g10030	cis	transcription repressor OFP17 [Cucurbita pepo subsp. pepo]
MSTRG.12598.12	Cp4.1LG05g10160	cis	uncharacterized protein LOC111795592 [Cucurbita pepo subsp. pepo]
MSTRG.12598.12	Cp4.1LG05g09950	cis	uncharacterized protein LOC111796073 [Cucurbita pepo subsp. pepo]
MSTRG.12598.12	Cp4.1LG05g10020	cis	GDSL esterase/lipase At2g30310-like [Cucurbita pepo subsp. pepo]
MSTRG.12598.12	Cp4.1LG05g09960	cis	pentatricopeptide repeat-containing protein At1g79540 [Cucurbita pepo subsp. pepo]
MSTRG.12598.12	Cp4.1LG05g10050	cis	aspartic proteinase NANA, chloroplast-like [Cucurbita pepo subsp. pepo]
MSTRG.12598.12	Cp4.1LG05g10190	cis	transmembrane protein 56-B-like isoform X1 [Cucurbita pepo subsp. pepo]
MSTRG.12598.12	Cp4.1LG05g10220	cis	hypothetical protein CJ030_MR1G009163 [Morella rubra]
MSTRG.12598.12	Cp4.1LG05g10010	cis	CBL-interacting serine/threonine-protein kinase 11 [Cucurbita pepo subsp. pepo]
MSTRG.12598.12	Cp4.1LG05g10100	cis	26S proteasome regulatory subunit 6B homolog [Cucurbita pepo subsp. pepo]
MSTRG.12598.12	Cp4.1LG05g10210	cis	hypothetical protein CJ030_MR1G009163 [Morella rubra]
MSTRG.12598.12	Cp4.1LG05g09990	cis	GDSL esterase/lipase At2g30310-like [Cucurbita pepo subsp. pepo]
MSTRG.12598.12	Cp4.1LG05g10130	cis	calcium uniporter protein 6, mitochondrial-like isoform X2 [Cucurbita pepo subsp. pepo]
MSTRG.12598.12	Cp4.1LG05g10000	cis	probable serine/threonine-protein kinase WNK4 [Cucurbita pepo subsp. pepo]
MSTRG.12598.12	Cp4.1LG05g09900	cis	uncharacterized protein LOC111796057 [Cucurbita pepo subsp. pepo]
MSTRG.12598.12	Cp4.1LG05g10070	cis	GDSL esterase/lipase At2g30310-like [Cucurbita pepo subsp. pepo]
MSTRG.12598.12	Cp4.1LG05g10110	cis	hypothetical protein TEA_010542 [Camellia sinensis var. sinensis]
MSTRG.12598.12	Cp4.1LG05g09910	cis	uncharacterized protein LOC111796093 [Cucurbita pepo subsp. pepo]
MSTRG.12598.12	Cp4.1LG05g10060	cis	GDSL esterase/lipase At2g30310-like [Cucurbita pepo subsp. pepo]
MSTRG.12598.12	Cp4.1LG05g10040	cis	--
MSTRG.12598.12	Cp4.1LG05g09940	cis	CBL-interacting serine/threonine-protein kinase 10-like [Cucurbita pepo subsp. pepo]
MSTRG.12598.12	Cp4.1LG05g10140	cis	trans-cinnamate 4-monooxygenase [Cucurbita pepo subsp. pepo]
MSTRG.12598.12	Cp4.1LG05g09920	cis	uncharacterized protein LOC111794704 [Cucurbita pepo subsp. pepo]
MSTRG.12598.12	Cp4.1LG05g09980	cis	WRKY transcription factor WRKY24-like [Cucurbita pepo subsp. pepo]
MSTRG.12598.12	Cp4.1LG05g10150	cis	uncharacterized protein LOC111795485 [Cucurbita pepo subsp. pepo]
MSTRG.12598.12	Cp4.1LG05g09930	cis	uncharacterized protein LOC111796073 [Cucurbita pepo subsp. pepo]
MSTRG.12598.12	Cp4.1LG05g10080	cis	NAD(P)H-quinone oxidoreductase subunit N, chloroplastic [Cucurbita pepo subsp. pepo]
MSTRG.12598.12	Cp4.1LG05g09970	cis	transcription factor RF2b-like [Cucurbita pepo subsp. pepo]
MSTRG.12598.13	Cp4.1LG19g03770	trans	thaumatin-like protein 1 [Cucurbita pepo subsp. pepo]
MSTRG.12598.13	Cp4.1LG18g00140	trans	galactinol synthase 2-like [Cucurbita pepo subsp. pepo]
MSTRG.12598.13	Cp4.1LG14g09180	trans	uncharacterized protein LOC111430964 [Cucurbita moschata]
MSTRG.12598.13	Cp4.1LG12g03070	trans	hypothetical protein Csa_023055 [Cucumis sativus]
MSTRG.12598.13	Cp4.1LG00g10110	trans	--
MSTRG.12598.13	Cp4.1LG18g01470	trans	beta-glucosidase 12-like [Prunus avium]
MSTRG.12598.13	Cp4.1LG15g00950	trans	uncharacterized protein LOC111811557 [Cucurbita pepo subsp. pepo]
MSTRG.12598.13	Cp4.1LG05g09880	cis	GDSL esterase/lipase At2g30310-like [Cucurbita pepo subsp. pepo]
MSTRG.12598.13	Cp4.1LG02g06130	trans	protein ANTAGONIST OF LIKE HETEROCHROMATIN PROTEIN 1-like [Cucurbita pepo subsp. pepo]
MSTRG.12598.13	Cp4.1LG16g08420	trans	hypothetical protein C5167_003989 [Papaver somniferum]
MSTRG.12598.13	Cp4.1LG14g05290	trans	--
MSTRG.12598.13	Cp4.1LG19g06690	trans	protein PHOSPHATE STARVATION RESPONSE 3-like [Cucurbita pepo subsp. pepo]
MSTRG.12598.13	Cp4.1LG05g10050	cis	aspartic proteinase NANA, chloroplast-like [Cucurbita pepo subsp. pepo]
MSTRG.12598.13	Cp4.1LG05g09950	cis	uncharacterized protein LOC111796073 [Cucurbita pepo subsp. pepo]
MSTRG.12598.13	Cp4.1LG11g05370	trans	pollen receptor-like kinase 4 [Cucurbita pepo subsp. pepo]
MSTRG.12598.13	Cp4.1LG16g03560	trans	metallothionein-like protein 4A [Cucurbita pepo subsp. pepo]
MSTRG.12598.13	Cp4.1LG00g05100	trans	long-chain-alcohol oxidase FAO1-like [Cucurbita pepo subsp. pepo]
MSTRG.12598.13	Cp4.1LG05g09970	cis	transcription factor RF2b-like [Cucurbita pepo subsp. pepo]
MSTRG.12598.13	Cp4.1LG05g09930	cis	uncharacterized protein LOC111796073 [Cucurbita pepo subsp. pepo]
MSTRG.12598.13	Cp4.1LG19g11920	trans	crossover junction endonuclease EME1B isoform X1 [Cucumis melo var. makuwa]
MSTRG.12598.13	Cp4.1LG05g10150	cis	uncharacterized protein LOC111795485 [Cucurbita pepo subsp. pepo]
MSTRG.12598.13	Cp4.1LG06g00580	trans	auxin-responsive protein SAUR50-like [Cucurbita pepo subsp. pepo]
MSTRG.12598.13	Cp4.1LG05g10040	cis	--
MSTRG.12598.13	Cp4.1LG01g00920	trans	uncharacterized protein LOC111808127 [Cucurbita pepo subsp. pepo]
MSTRG.12598.13	Cp4.1LG07g04660	trans	uncharacterized protein LOC111799204 [Cucurbita pepo subsp. pepo]
MSTRG.12598.13	Cp4.1LG05g10160	cis	uncharacterized protein LOC111795592 [Cucurbita pepo subsp. pepo]
MSTRG.12598.13	Cp4.1LG05g10030	cis	transcription repressor OFP17 [Cucurbita pepo subsp. pepo]
MSTRG.12598.13	Cp4.1LG20g07990	trans	mitochondrial import inner membrane translocase subunit TIM22-4-like [Ipomoea triloba]
MSTRG.12598.13	Cp4.1LG00g00720	trans	NAC domain-containing protein 12-like [Cucurbita pepo subsp. pepo]
MSTRG.12598.13	Cp4.1LG12g11540	trans	late embryogenesis abundant protein D-34-like [Cucurbita pepo subsp. pepo]
MSTRG.12598.13	Cp4.1LG05g00520	trans	uncharacterized protein LOC111437331 [Cucurbita moschata]
MSTRG.12598.13	Cp4.1LG08g03150	trans	acid phosphatase 1-like [Cucurbita pepo subsp. pepo]
MSTRG.12598.13	Cp4.1LG13g09560	trans	dirigent protein 25-like [Cucurbita pepo subsp. pepo]
MSTRG.12598.13	Cp4.1LG10g08510	trans	--
MSTRG.12598.13	Cp4.1LG09g00590	trans	reticulon-like protein B1 [Cucurbita pepo subsp. pepo]
MSTRG.12598.13	Cp4.1LG18g05100	trans	--
MSTRG.12598.13	Cp4.1LG03g10920	trans	probable aquaporin NIP7-1 [Cucurbita pepo subsp. pepo]
MSTRG.12598.13	Cp4.1LG05g10010	cis	CBL-interacting serine/threonine-protein kinase 11 [Cucurbita pepo subsp. pepo]
MSTRG.12598.13	Cp4.1LG11g01790	trans	--
MSTRG.12598.13	Cp4.1LG01g10470	trans	uncharacterized protein LOC111458393 [Cucurbita moschata]
MSTRG.12598.13	Cp4.1LG08g03080	trans	probable indole-3-pyruvate monooxygenase YUCCA3 [Cucurbita pepo subsp. pepo]
MSTRG.12598.13	Cp4.1LG05g09960	cis	pentatricopeptide repeat-containing protein At1g79540 [Cucurbita pepo subsp. pepo]
MSTRG.12598.13	Cp4.1LG03g00980	trans	protein ABSCISIC ACID-INSENSITIVE 5 [Cucurbita pepo subsp. pepo]
MSTRG.12598.13	Cp4.1LG15g01030	trans	PREDICTED: homeobox-leucine zipper protein HDG2-like [Cucumis melo]
MSTRG.12598.13	Cp4.1LG13g03580	trans	pectinesterase [Cucurbita pepo subsp. pepo]
MSTRG.12598.13	Cp4.1LG04g02320	trans	nucleolar complex-associated protein 3 isoform X2 [Prunus dulcis]
MSTRG.12598.13	Cp4.1LG13g05350	trans	exocyst complex component EXO70B1-like [Cucurbita pepo subsp. pepo]
MSTRG.12598.13	Cp4.1LG05g10210	cis	hypothetical protein CJ030_MR1G009163 [Morella rubra]
MSTRG.12598.13	Cp4.1LG05g10080	cis	NAD(P)H-quinone oxidoreductase subunit N, chloroplastic [Cucurbita pepo subsp. pepo]
MSTRG.12598.13	Cp4.1LG13g03500	trans	uncharacterized protein LOC111808705 [Cucurbita pepo subsp. pepo]
MSTRG.12598.13	Cp4.1LG14g00790	trans	dof zinc finger protein DOF5.7-like [Cucurbita pepo subsp. pepo]
MSTRG.12598.13	Cp4.1LG11g02010	trans	uncharacterized protein LOC111491859 [Cucurbita maxima]
MSTRG.12598.13	Cp4.1LG05g10140	cis	trans-cinnamate 4-monooxygenase [Cucurbita pepo subsp. pepo]
MSTRG.12598.13	Cp4.1LG08g13960	trans	protein STRUBBELIG-RECEPTOR FAMILY 2-like isoform X1 [Cucurbita pepo subsp. pepo]
MSTRG.12598.13	Cp4.1LG05g09940	cis	CBL-interacting serine/threonine-protein kinase 10-like [Cucurbita pepo subsp. pepo]
MSTRG.12598.13	Cp4.1LG01g00980	trans	scarecrow-like protein 23 [Cucurbita maxima]
MSTRG.12598.13	Cp4.1LG05g09910	cis	uncharacterized protein LOC111796093 [Cucurbita pepo subsp. pepo]
MSTRG.12598.13	Cp4.1LG20g08720	trans	uncharacterized protein LOC111782795 [Cucurbita pepo subsp. pepo]
MSTRG.12598.13	Cp4.1LG00g14790	trans	probable serine/threonine-protein kinase PBL18 [Cucurbita moschata]
MSTRG.12598.13	Cp4.1LG00g13880	trans	protein S-acyltransferase 8-like [Cucurbita maxima]
MSTRG.12598.13	Cp4.1LG14g07300	trans	2-iminobutanoate/2-iminopropanoate deaminase-like [Cucurbita pepo subsp. pepo]
MSTRG.12598.13	Cp4.1LG19g08490	trans	thiosulfate sulfurtransferase 16, chloroplastic-like [Cucurbita pepo subsp. pepo]
MSTRG.12598.13	Cp4.1LG06g10090	trans	GDSL esterase/lipase At1g71691-like isoform X1 [Cucurbita pepo subsp. pepo]
MSTRG.12598.13	Cp4.1LG14g03330	trans	probable glutathione S-transferase [Cucurbita pepo subsp. pepo]
MSTRG.12598.13	Cp4.1LG15g06090	trans	uncharacterized protein LOC111776510 [Cucurbita pepo subsp. pepo]
MSTRG.12598.13	Cp4.1LG19g11490	trans	cold-regulated 413 plasma membrane protein 2 [Cucurbita pepo subsp. pepo]
MSTRG.12598.13	Cp4.1LG09g08980	trans	uncharacterized protein LOC111802152 [Cucurbita pepo subsp. pepo]
MSTRG.12598.13	Cp4.1LG05g10190	cis	transmembrane protein 56-B-like isoform X1 [Cucurbita pepo subsp. pepo]
MSTRG.12598.13	Cp4.1LG01g08900	trans	AP2-like ethylene-responsive transcription factor AIL6 [Cucurbita pepo subsp. pepo]
MSTRG.12598.13	Cp4.1LG10g08520	trans	--
MSTRG.12598.13	Cp4.1LG04g14030	trans	uncharacterized protein LOC111793909 [Cucurbita pepo subsp. pepo]
MSTRG.12598.13	Cp4.1LG07g10230	trans	--
MSTRG.12598.13	Cp4.1LG11g11180	trans	rho guanine nucleotide exchange factor 8-like [Cucurbita pepo subsp. pepo]
MSTRG.12598.13	Cp4.1LG11g00950	trans	homeotic protein knotted-1-like [Cucurbita pepo subsp. pepo]
MSTRG.12598.13	Cp4.1LG05g10020	cis	GDSL esterase/lipase At2g30310-like [Cucurbita pepo subsp. pepo]
MSTRG.12598.13	Cp4.1LG00g13840	trans	protein LIGHT-DEPENDENT SHORT HYPOCOTYLS 10-like [Cucurbita pepo subsp. pepo]
MSTRG.12598.13	Cp4.1LG11g10430	trans	probable glycosyltransferase At3g42180 [Cucurbita pepo subsp. pepo]
MSTRG.12598.13	Cp4.1LG05g09900	cis	uncharacterized protein LOC111796057 [Cucurbita pepo subsp. pepo]
MSTRG.12598.13	Cp4.1LG04g02940	trans	--
MSTRG.12598.13	Cp4.1LG00g02830	trans	chromatin assembly factor 1 subunit FAS1 isoform X3 [Cucumis sativus]
MSTRG.12598.13	Cp4.1LG05g10000	cis	probable serine/threonine-protein kinase WNK4 [Cucurbita pepo subsp. pepo]
MSTRG.12598.13	Cp4.1LG17g02740	trans	pentatricopeptide repeat-containing protein At1g04840 [Cucurbita pepo subsp. pepo]
MSTRG.12598.13	Cp4.1LG04g14830	trans	hypothetical protein Csa_014085 [Cucumis sativus]
MSTRG.12598.13	Cp4.1LG00g02220	trans	WAT1-related protein At1g09380-like [Cucurbita pepo subsp. pepo]
MSTRG.12598.13	Cp4.1LG02g03810	trans	uncharacterized protein At5g65660-like isoform X1 [Cucurbita pepo subsp. pepo]
MSTRG.12598.13	Cp4.1LG16g05580	trans	vicilin-like seed storage protein At2g28490 [Cucurbita pepo subsp. pepo]
MSTRG.12598.13	Cp4.1LG05g10100	cis	26S proteasome regulatory subunit 6B homolog [Cucurbita pepo subsp. pepo]
MSTRG.12598.13	Cp4.1LG01g12350	trans	hypothetical protein Csa_009059 [Cucumis sativus]
MSTRG.12598.13	Cp4.1LG20g08010	trans	60S acidic ribosomal protein P0-like [Cucurbita moschata]
MSTRG.12598.13	Cp4.1LG20g02800	trans	uncharacterized protein LOC111431688 isoform X1 [Cucurbita moschata]
MSTRG.12598.13	Cp4.1LG02g05660	trans	ethylene-responsive transcription factor ERF017-like [Cucurbita pepo subsp. pepo]
MSTRG.12598.13	Cp4.1LG05g09980	cis	WRKY transcription factor WRKY24-like [Cucurbita pepo subsp. pepo]
MSTRG.12598.13	Cp4.1LG05g13920	trans	F-box protein SNE-like [Cucurbita moschata]
MSTRG.12598.13	Cp4.1LG05g02420	trans	protein NRT1/ PTR FAMILY 6.3-like [Cucurbita pepo subsp. pepo]
MSTRG.12598.13	Cp4.1LG02g06200	trans	probable protein phosphatase 2C 72 [Cucurbita pepo subsp. pepo]
MSTRG.12598.13	Cp4.1LG05g10060	cis	GDSL esterase/lipase At2g30310-like [Cucurbita pepo subsp. pepo]
MSTRG.12598.13	Cp4.1LG05g09890	cis	N-terminal acetyltransferase B complex auxiliary subunit NAA25-like [Cucurbita pepo subsp. pepo]
MSTRG.12598.13	Cp4.1LG08g01590	trans	probable methyltransferase PMT15 [Cucurbita pepo subsp. pepo]
MSTRG.12598.13	Cp4.1LG15g05400	trans	3-ketoacyl-CoA synthase 17-like [Cucurbita pepo subsp. pepo]
MSTRG.12598.13	Cp4.1LG02g08450	trans	probable serine/threonine-protein kinase At4g35230 [Cucurbita pepo subsp. pepo]
MSTRG.12598.13	Cp4.1LG04g00460	trans	phosphoacetylglucosamine mutase [Cucurbita pepo subsp. pepo]
MSTRG.12598.13	Cp4.1LG18g07320	trans	hypothetical protein Csa_013996 [Cucumis sativus]
MSTRG.12598.13	Cp4.1LG06g06460	trans	protein LIGHT-DEPENDENT SHORT HYPOCOTYLS 10-like [Cucurbita pepo subsp. pepo]
MSTRG.12598.13	Cp4.1LG03g07110	trans	protein ABHD17B-like isoform X1 [Cucurbita moschata]
MSTRG.12598.13	Cp4.1LG02g01160	trans	vascular-related unknown protein 4-like [Cucurbita pepo subsp. pepo]
MSTRG.12598.13	Cp4.1LG07g03560	trans	expansin-A11-like [Cucurbita pepo subsp. pepo]
MSTRG.12598.13	Cp4.1LG19g09800	trans	ras-related protein RABH1e-like [Cucurbita moschata]
MSTRG.12598.13	Cp4.1LG05g10220	cis	hypothetical protein CJ030_MR1G009163 [Morella rubra]
MSTRG.12598.13	Cp4.1LG07g03510	trans	--
MSTRG.12598.13	Cp4.1LG01g15490	trans	homeobox protein knotted-1-like 6 [Cucurbita pepo subsp. pepo]
MSTRG.12598.13	Cp4.1LG02g09150	trans	--
MSTRG.12598.13	Cp4.1LG02g01230	trans	AP-5 complex subunit zeta-1-like isoform X1 [Cucurbita pepo subsp. pepo]
MSTRG.12598.13	Cp4.1LG19g05930	trans	pentatricopeptide repeat-containing protein At1g64583, mitochondrial-like [Cucurbita moschata]
MSTRG.12598.13	Cp4.1LG13g04620	trans	uncharacterized protein LOC111808739 [Cucurbita pepo subsp. pepo]
MSTRG.12598.13	Cp4.1LG06g00820	trans	thioredoxin H-type-like [Cucurbita maxima]
MSTRG.12598.13	Cp4.1LG08g03540	trans	hypothetical protein VIGAN_08357900 [Vigna angularis var. angularis]
MSTRG.12598.13	Cp4.1LG19g06490	trans	floral homeotic protein AGAMOUS-like isoform X1 [Cucurbita pepo subsp. pepo]
MSTRG.12598.13	Cp4.1LG05g10130	cis	calcium uniporter protein 6, mitochondrial-like isoform X2 [Cucurbita pepo subsp. pepo]
MSTRG.12598.13	Cp4.1LG05g09990	cis	GDSL esterase/lipase At2g30310-like [Cucurbita pepo subsp. pepo]
MSTRG.12598.13	Cp4.1LG03g04310	trans	40S ribosomal protein S2-4-like [Cucurbita pepo subsp. pepo]
MSTRG.12598.13	Cp4.1LG02g05410	trans	zinc finger protein 3-like [Cucurbita pepo subsp. pepo]
MSTRG.12598.13	Cp4.1LG04g15090	trans	mini zinc finger protein 3-like [Cucurbita pepo subsp. pepo]
MSTRG.12598.13	Cp4.1LG05g06750	trans	uncharacterized protein LOC111795629 isoform X2 [Cucurbita pepo subsp. pepo]
MSTRG.12598.13	Cp4.1LG05g09920	cis	uncharacterized protein LOC111794704 [Cucurbita pepo subsp. pepo]
MSTRG.12598.13	Cp4.1LG05g10070	cis	GDSL esterase/lipase At2g30310-like [Cucurbita pepo subsp. pepo]
MSTRG.12598.13	Cp4.1LG05g10110	cis	hypothetical protein TEA_010542 [Camellia sinensis var. sinensis]
MSTRG.1264.1	Cp4.1LG00g06940	trans	alpha-mannosidase I MNS4 isoform X1 [Cucurbita pepo subsp. pepo]
MSTRG.1264.1	Cp4.1LG00g10430	trans	probable beta-1,3-galactosyltransferase 2 isoform X1 [Cucurbita pepo subsp. pepo]
MSTRG.1264.1	Cp4.1LG00g10440	trans	tRNA wybutosine-synthesizing protein 2/3/4-like [Cucurbita pepo subsp. pepo]
MSTRG.1264.1	Cp4.1LG00g07290	trans	WD repeat-containing protein 44-like [Cucurbita pepo subsp. pepo]
MSTRG.1264.1	Cp4.1LG00g05480	trans	putative ion channel POLLUX-like 2 [Cucurbita pepo subsp. pepo]
MSTRG.1264.1	Cp4.1LG00g09480	both	uncharacterized protein LOC111441419 [Cucurbita moschata]
MSTRG.1264.1	Cp4.1LG00g10720	trans	uncharacterized protein LOC111450850 [Cucurbita moschata]
MSTRG.1264.1	Cp4.1LG00g10590	trans	protein KINESIN LIGHT CHAIN-RELATED 1-like [Cucurbita pepo subsp. pepo]
MSTRG.1264.1	Cp4.1LG00g02170	trans	transcription factor bHLH96-like [Cucurbita pepo subsp. pepo]
MSTRG.1264.1	Cp4.1LG00g09390	cis	DNA-directed RNA polymerase II subunit 1-like [Cucurbita moschata]
MSTRG.1264.1	Cp4.1LG00g09140	trans	uncharacterized protein LOC111785797 [Cucurbita pepo subsp. pepo]
MSTRG.1264.1	Cp4.1LG00g06470	trans	DNA mismatch repair protein MSH4-like [Cucurbita pepo subsp. pepo]
MSTRG.1264.1	Cp4.1LG00g09380	cis	uncharacterized protein LOC116247067 [Nymphaea colorata]
MSTRG.1264.1	Cp4.1LG00g09940	trans	uncharacterized protein LOC111785973 [Cucurbita pepo subsp. pepo]
MSTRG.1264.1	Cp4.1LG00g09300	trans	1-aminocyclopropane-1-carboxylate oxidase 3-like isoform X1 [Cucurbita pepo subsp. pepo]
MSTRG.1264.1	Cp4.1LG00g07600	trans	uncharacterized protein LOC111805453 [Cucurbita pepo subsp. pepo]
MSTRG.1264.1	Cp4.1LG08g01930	trans	uncharacterized protein LOC111801162 [Cucurbita pepo subsp. pepo]
MSTRG.1264.1	Cp4.1LG00g09830	trans	high mobility group B protein 6-like [Cucurbita pepo subsp. pepo]
MSTRG.1264.1	Cp4.1LG00g10510	trans	aspartic proteinase nepenthesin-1-like [Cucurbita pepo subsp. pepo]
MSTRG.1264.1	Cp4.1LG00g05530	trans	probable disease resistance protein At4g27220, partial [Cucurbita pepo subsp. pepo]
MSTRG.1264.1	Cp4.1LG00g06770	trans	dof zinc finger protein DOF2.1-like [Cucurbita pepo subsp. pepo]
MSTRG.1264.1	Cp4.1LG00g07330	trans	glycerol-3-phosphate 2-O-acyltransferase 6-like [Cucurbita pepo subsp. pepo]
MSTRG.1264.1	Cp4.1LG00g09370	cis	putative calcium-binding protein CML10 [Cucumis melo var. makuwa]
MSTRG.1264.1	Cp4.1LG00g10920	trans	transcription factor bHLH123-like [Cucurbita pepo subsp. pepo]
MSTRG.1264.1	Cp4.1LG00g09330	trans	methyltransferase-like protein 25 isoform X2 [Cucurbita pepo subsp. pepo]
MSTRG.1264.1	Cp4.1LG00g06390	trans	beta-galactosidase 8-like isoform X1 [Cucurbita pepo subsp. pepo]
MSTRG.1264.1	Cp4.1LG03g13180	trans	putative pentatricopeptide repeat-containing protein At5g13230, mitochondrial [Cucurbita pepo subsp. pepo]
MSTRG.1264.1	Cp4.1LG00g09100	trans	putative Calcium-binding EF-hand family protein [Cucumis melo var. makuwa]
MSTRG.1264.1	Cp4.1LG00g07930	trans	cyclic nucleotide-gated ion channel 18 [Cucurbita maxima]
MSTRG.1264.1	Cp4.1LG00g07580	trans	pre-mRNA-splicing factor CWC25-like [Cucurbita pepo subsp. pepo]
MSTRG.1264.1	Cp4.1LG00g09430	cis	SUN domain-containing protein 4-like [Cucurbita pepo subsp. pepo]
MSTRG.1264.1	Cp4.1LG00g09440	cis	putative leucine-rich repeat receptor-like protein kinase At2g19210 isoform X2 [Cucurbita pepo subsp. pepo]
MSTRG.1264.1	Cp4.1LG00g08140	trans	peroxisomal adenine nucleotide carrier 1-like, partial [Cucurbita pepo subsp. pepo]
MSTRG.1264.1	Cp4.1LG00g08630	trans	lachrymatory-factor synthase-like [Cucurbita pepo subsp. pepo]
MSTRG.1264.1	Cp4.1LG00g07820	trans	U-box domain-containing protein 26 [Cucurbita maxima]
MSTRG.1264.1	Cp4.1LG00g06320	trans	uncharacterized protein LOC111785283 isoform X1 [Cucurbita pepo subsp. pepo]
MSTRG.1264.1	Cp4.1LG00g09820	trans	probable GABA transporter 2 isoform X1 [Cucurbita pepo subsp. pepo]
MSTRG.1264.1	Cp4.1LG10g05980	trans	protein TIFY 5A [Cucurbita pepo subsp. pepo]
MSTRG.1264.1	Cp4.1LG00g09260	trans	O-fucosyltransferase 27-like isoform X1 [Cucurbita pepo subsp. pepo]
MSTRG.1264.1	Cp4.1LG00g11130	trans	uncharacterized protein LOC111786238 [Cucurbita pepo subsp. pepo]
MSTRG.1264.1	Cp4.1LG00g07110	trans	uncharacterized protein LOC111481959 isoform X4 [Cucurbita maxima]
MSTRG.1264.1	Cp4.1LG00g09030	trans	GDSL esterase/lipase At1g54790-like, partial [Cucurbita pepo subsp. pepo]
MSTRG.1264.1	Cp4.1LG00g09740	trans	phosphatidylinositol:ceramide inositolphosphotransferase 1 isoform X1 [Cucurbita maxima]
MSTRG.1264.1	Cp4.1LG00g06270	trans	neutral ceramidase 2-like [Cucurbita moschata]
MSTRG.1264.1	Cp4.1LG00g05950	trans	protein BRANCHLESS TRICHOME-like [Cucurbita pepo subsp. pepo]
MSTRG.1264.1	Cp4.1LG00g10160	trans	uncharacterized protein LOC111786015, partial [Cucurbita pepo subsp. pepo]
MSTRG.1264.1	Cp4.1LG00g09410	cis	inositol-tetrakisphosphate 1-kinase 1-like [Cucurbita pepo subsp. pepo]
MSTRG.1264.1	Cp4.1LG00g04410	trans	eukaryotic translation initiation factor 2 subunit beta-like [Quercus suber]
MSTRG.1264.1	Cp4.1LG00g08130	trans	uncharacterized protein LOC111785619 [Cucurbita pepo subsp. pepo]
MSTRG.1264.1	Cp4.1LG00g02480	trans	--
MSTRG.1264.1	Cp4.1LG00g07390	trans	ribosomal L1 domain-containing protein 1-like [Cucurbita pepo subsp. pepo]
MSTRG.1264.1	Cp4.1LG00g08260	trans	65-kDa microtubule-associated protein 3-like [Cucurbita pepo subsp. pepo]
MSTRG.1264.1	Cp4.1LG05g15000	trans	riboflavin synthase-like [Cucurbita pepo subsp. pepo]
MSTRG.1264.1	Cp4.1LG00g09010	trans	mitogen-activated protein kinase kinase kinase 2-like isoform X2 [Cucurbita moschata]
MSTRG.1264.1	Cp4.1LG00g09780	trans	WD repeat-containing protein 44-like [Cucurbita pepo subsp. pepo]
MSTRG.1264.1	Cp4.1LG00g07650	trans	probable leucine-rich repeat receptor-like protein kinase At5g63930 isoform X1 [Cucurbita pepo subsp. pepo]
MSTRG.1264.1	Cp4.1LG00g06410	trans	WAT1-related protein At1g43650-like [Cucurbita pepo subsp. pepo]
MSTRG.1264.1	Cp4.1LG00g08620	trans	uncharacterized protein LOC111785703 [Cucurbita pepo subsp. pepo]
MSTRG.1264.1	Cp4.1LG19g06270	trans	probable WRKY transcription factor 28 [Cucurbita pepo subsp. pepo]
MSTRG.1264.1	Cp4.1LG00g09420	cis	probable glycosyltransferase At5g03795 [Cucurbita pepo subsp. pepo]
MSTRG.1264.1	Cp4.1LG00g09460	cis	remorin 4.1-like isoform X1 [Cucurbita pepo subsp. pepo]
MSTRG.1264.1	Cp4.1LG00g08410	trans	conserved oligomeric Golgi complex subunit 1-like isoform X1 [Cucurbita pepo subsp. pepo]
MSTRG.1264.1	Cp4.1LG00g09190	trans	uncharacterized protein C594.04c-like [Cucurbita pepo subsp. pepo]
MSTRG.1264.1	Cp4.1LG00g08170	trans	cyclin-P3-1-like [Cucurbita moschata]
MSTRG.1264.1	Cp4.1LG00g10080	trans	probable nucleolar protein 5-2 [Cucurbita pepo subsp. pepo]
MSTRG.1264.1	Cp4.1LG00g09450	both	geraniol 8-hydroxylase-like [Cucurbita pepo subsp. pepo]
MSTRG.1264.1	Cp4.1LG00g10960	trans	protein NETWORKED 4A-like isoform X4 [Cucurbita pepo subsp. pepo]
MSTRG.1264.1	Cp4.1LG00g10730	trans	ethylene-responsive transcription factor WIN1-like [Cucurbita pepo subsp. pepo]
MSTRG.1264.1	Cp4.1LG00g07230	trans	transcription termination factor MTERF2, chloroplastic-like isoform X1 [Cucurbita pepo subsp. pepo]
MSTRG.1264.1	Cp4.1LG00g11310	trans	cell division control protein 2 homolog C-like [Cucurbita pepo subsp. pepo]
MSTRG.1264.1	Cp4.1LG00g08650	trans	uncharacterized protein LOC111785706 [Cucurbita pepo subsp. pepo]
MSTRG.1264.1	Cp4.1LG00g07460	trans	60S ribosomal protein L31-like [Cucurbita pepo subsp. pepo]
MSTRG.1264.1	Cp4.1LG00g10560	trans	rho GTPase-activating protein 2-like [Cucurbita pepo subsp. pepo]
MSTRG.1264.1	Cp4.1LG00g06640	trans	dehydration-responsive element-binding protein 1E-like [Cucurbita pepo subsp. pepo]
MSTRG.1264.1	Cp4.1LG03g06170	trans	--
MSTRG.1264.1	Cp4.1LG00g08110	trans	uncharacterized protein LOC111785619 [Cucurbita pepo subsp. pepo]
MSTRG.1264.1	Cp4.1LG00g11380	trans	4-hydroxy-3-methylbut-2-en-1-yl diphosphate synthase (ferredoxin), chloroplastic [Cucurbita pepo subsp. pepo]
MSTRG.1264.1	Cp4.1LG00g07270	trans	glucan endo-1,3-beta-glucosidase-like [Cucurbita pepo subsp. pepo]
MSTRG.1264.1	Cp4.1LG09g08890	trans	sulfite exporter TauE/SafE family protein 5-like [Cucurbita pepo subsp. pepo]
MSTRG.1264.1	Cp4.1LG00g07120	trans	PREDICTED: general transcription factor IIE subunit 2-like [Cucumis melo]
MSTRG.1264.1	Cp4.1LG00g05240	trans	DNA repair protein recA homolog 3, mitochondrial-like [Cucurbita pepo subsp. pepo]
MSTRG.1264.1	Cp4.1LG00g09470	both	probable S-sulfocysteine synthase, chloroplastic [Cucurbita pepo subsp. pepo]
MSTRG.1264.1	Cp4.1LG00g09400	cis	transcription factor MYB41-like [Cucurbita pepo subsp. pepo]
MSTRG.1264.1	Cp4.1LG11g00580	trans	ARM REPEAT PROTEIN INTERACTING WITH ABF2 [Cucurbita pepo subsp. pepo]
MSTRG.1264.1	Cp4.1LG00g04860	trans	F-box/kelch-repeat protein At5g60570-like [Cucurbita pepo subsp. pepo]
MSTRG.1264.1	Cp4.1LG00g07360	trans	pentatricopeptide repeat-containing protein At5g39980, chloroplastic-like [Cucurbita pepo subsp. pepo]
MSTRG.1264.1	Cp4.1LG00g06900	trans	monothiol glutaredoxin-S10-like [Cucurbita pepo subsp. pepo]
MSTRG.1264.1	Cp4.1LG00g06150	trans	zinc transporter 3-like [Cucurbita pepo subsp. pepo]
MSTRG.1264.1	Cp4.1LG00g06610	trans	probable LRR receptor-like serine/threonine-protein kinase At1g51880 [Cucurbita pepo subsp. pepo]
MSTRG.1264.1	Cp4.1LG03g14570	trans	uncharacterized protein LOC111790257 [Cucurbita pepo subsp. pepo]
MSTRG.1264.1	Cp4.1LG00g06540	trans	kinesin-like protein KIN-1 [Cucurbita pepo subsp. pepo]
MSTRG.1264.1	Cp4.1LG00g08380	trans	uncharacterized protein LOC111785657 [Cucurbita pepo subsp. pepo]
MSTRG.1264.1	Cp4.1LG00g08480	trans	aspartyl protease family protein 1-like [Cucurbita pepo subsp. pepo]
MSTRG.1264.1	Cp4.1LG00g07010	trans	uncharacterized protein LOC111785403 [Cucurbita pepo subsp. pepo]
MSTRG.1264.1	Cp4.1LG00g09810	trans	uncharacterized protein LOC111801188 [Cucurbita pepo subsp. pepo]
MSTRG.1264.1	Cp4.1LG00g10830	trans	ethylene-responsive transcription factor CRF2-like [Cucurbita pepo subsp. pepo]
MSTRG.1264.1	Cp4.1LG00g07170	trans	UBP1-associated protein 2B-like [Cucurbita pepo subsp. pepo]
MSTRG.1264.1	Cp4.1LG04g00980	trans	protein NUCLEAR FUSION DEFECTIVE 6, chloroplastic/mitochondrial [Cucurbita pepo subsp. pepo]
MSTRG.1264.1	Cp4.1LG00g07520	trans	LOB domain-containing protein 21-like isoform X1 [Cucurbita pepo subsp. pepo]
MSTRG.1264.1	Cp4.1LG00g09490	both	uncharacterized protein At3g28850-like [Cucurbita pepo subsp. pepo]
MSTRG.1264.1	Cp4.1LG00g05850	trans	probable disease resistance protein At4g19060 [Cucurbita pepo subsp. pepo]
MSTRG.1264.1	Cp4.1LG00g08880	trans	ethylene-responsive transcription factor RAP2-11-like [Cucurbita pepo subsp. pepo]
MSTRG.1264.1	Cp4.1LG00g11090	trans	transcription factor bHLH49-like [Cucurbita pepo subsp. pepo]
MSTRG.1264.1	Cp4.1LG00g09650	trans	uncharacterized protein LOC111785907, partial [Cucurbita pepo subsp. pepo]
MSTRG.1264.1	Cp4.1LG00g01970	trans	uncharacterized protein LOC111784188 [Cucurbita pepo subsp. pepo]
MSTRG.1264.1	Cp4.1LG00g05940	trans	uncharacterized protein At5g39865-like [Cucurbita pepo subsp. pepo]
MSTRG.1264.1	Cp4.1LG15g05850	trans	COBRA-like protein 2, partial [Cucurbita pepo subsp. pepo]
MSTRG.1264.1	Cp4.1LG00g08690	trans	vesicle-associated membrane protein 724-like [Cucurbita pepo subsp. pepo]
MSTRG.12770.2	Cp4.1LG04g02260	trans	zinc transporter 1-like [Cucurbita pepo subsp. pepo]
MSTRG.12770.2	Cp4.1LG05g11600	cis	mitogen-activated protein kinase kinase kinase 18-like [Cucurbita pepo subsp. pepo]
MSTRG.12770.2	Cp4.1LG20g00340	trans	putative pentatricopeptide repeat-containing protein At1g74580 [Cucurbita pepo subsp. pepo]
MSTRG.12770.2	Cp4.1LG04g10920	trans	mechanosensitive ion channel protein 10-like [Cucurbita pepo subsp. pepo]
MSTRG.12770.2	Cp4.1LG05g11610	cis	protein CONSERVED IN THE GREEN LINEAGE AND DIATOMS 27, chloroplastic [Cucurbita pepo subsp. pepo]
MSTRG.12770.2	Cp4.1LG06g04950	trans	dehydration-responsive element-binding protein 3-like [Cucurbita pepo subsp. pepo]
MSTRG.12770.2	Cp4.1LG05g11630	cis	copper-transporting ATPase HMA4-like, partial [Cucurbita pepo subsp. pepo]
MSTRG.12770.2	Cp4.1LG07g02180	trans	calmodulin-like protein 2 [Cucurbita moschata]
MSTRG.12770.2	Cp4.1LG05g11740	cis	F-box protein At5g67140 [Cucurbita pepo subsp. pepo]
MSTRG.12770.2	Cp4.1LG20g06100	trans	BOI-related E3 ubiquitin-protein ligase 1-like [Cucurbita pepo subsp. pepo]
MSTRG.12770.2	Cp4.1LG05g11640	cis	DNA polymerase alpha catalytic subunit [Cucurbita pepo subsp. pepo]
MSTRG.12770.2	Cp4.1LG05g11700	cis	metal transporter Nramp3-like [Cucurbita pepo subsp. pepo]
MSTRG.12770.2	Cp4.1LG05g11690	cis	BTB/POZ domain-containing protein SR1IP1-like [Cucurbita pepo subsp. pepo]
MSTRG.12770.2	Cp4.1LG05g11760	cis	uncharacterized protein LOC111499640 [Cucurbita maxima]
MSTRG.12770.2	Cp4.1LG05g11710	cis	uncharacterized protein LOC111795757 [Cucurbita pepo subsp. pepo]
MSTRG.12770.2	Cp4.1LG05g11660	cis	hypothetical protein Csa_022628 [Cucumis sativus]
MSTRG.12770.2	Cp4.1LG07g06990	trans	HD domain-containing protein 2-like [Cucurbita pepo subsp. pepo]
MSTRG.12770.2	Cp4.1LG19g10180	trans	transcription factor bHLH93 [Cucurbita pepo subsp. pepo]
MSTRG.12770.2	Cp4.1LG02g06400	trans	uncharacterized protein LOC111788214 isoform X1 [Cucurbita pepo subsp. pepo]
MSTRG.12770.2	Cp4.1LG05g11650	cis	histone-lysine N-methyltransferase CLF-like [Cucurbita pepo subsp. pepo]
MSTRG.12770.2	Cp4.1LG01g07870	trans	--
MSTRG.12770.2	Cp4.1LG05g11730	cis	aspartic proteinase nepenthesin-2-like isoform X5 [Cucurbita maxima]
MSTRG.12770.2	Cp4.1LG14g06000	trans	ADP-ribosylation factor-related protein 1-like isoform X1 [Cucurbita pepo subsp. pepo]
MSTRG.12770.2	Cp4.1LG01g23620	trans	mitochondrial inner membrane protease ATP23 [Cucurbita moschata]
MSTRG.12770.2	Cp4.1LG13g11500	trans	gibberellin-regulated protein 9-like [Cucurbita pepo subsp. pepo]
MSTRG.12770.2	Cp4.1LG20g05990	trans	ras-related protein RABF2b-like [Cucurbita moschata]
MSTRG.12770.2	Cp4.1LG07g09580	trans	ankyrin-1 [Cucurbita pepo subsp. pepo]
MSTRG.12770.2	Cp4.1LG05g08230	trans	double-stranded RNA-binding protein 2-like [Cucurbita pepo subsp. pepo]
MSTRG.12770.2	Cp4.1LG05g11620	cis	PI-PLC X domain-containing protein At5g67130 [Cucurbita moschata]
MSTRG.12770.2	Cp4.1LG01g18650	trans	probable transmembrane ascorbate ferrireductase 3 [Cucurbita pepo subsp. pepo]
MSTRG.12770.2	Cp4.1LG08g02250	trans	uncharacterized protein LOC111800075 [Cucurbita pepo subsp. pepo]
MSTRG.12770.2	Cp4.1LG05g11550	cis	uncharacterized protein LOC111451004 isoform X1 [Cucurbita moschata]
MSTRG.12770.2	Cp4.1LG05g11670	cis	cytochrome P450 81F3-like isoform X1 [Cucurbita pepo subsp. pepo]
MSTRG.12770.2	Cp4.1LG05g11720	cis	U-box domain-containing protein 4-like [Cucurbita pepo subsp. pepo]
MSTRG.12770.2	Cp4.1LG05g11590	cis	LOW QUALITY PROTEIN: uncharacterized protein LOC111794365 [Cucurbita pepo subsp. pepo]
MSTRG.12770.2	Cp4.1LG05g11750	cis	uncharacterized protein LOC111795940 [Cucurbita pepo subsp. pepo]
MSTRG.12770.2	Cp4.1LG14g03000	trans	VQ motif-containing protein 22-like [Cucurbita pepo subsp. pepo]
MSTRG.12770.2	Cp4.1LG05g11470	cis	filament-like plant protein 7 [Cucurbita pepo subsp. pepo]
MSTRG.12770.2	Cp4.1LG05g11680	cis	nicotinate phosphoribosyltransferase 2-like [Cucurbita pepo subsp. pepo]
MSTRG.12848.1	Cp4.1LG05g12270	cis	uncharacterized protein LOC111795618 [Cucurbita pepo subsp. pepo]
MSTRG.12848.1	Cp4.1LG00g11600	trans	GTP-binding protein OBGC, chloroplastic [Cucurbita pepo subsp. pepo]
MSTRG.12848.1	Cp4.1LG13g10850	trans	uncharacterized protein LOC111809291 [Cucurbita pepo subsp. pepo]
MSTRG.12848.1	Cp4.1LG10g09600	trans	adenosine deaminase-like protein [Cucurbita pepo subsp. pepo]
MSTRG.12848.1	Cp4.1LG05g12240	cis	probable N-acetyl-gamma-glutamyl-phosphate reductase, chloroplastic [Cucurbita pepo subsp. pepo]
MSTRG.12848.1	Cp4.1LG02g02520	trans	4-hydroxyphenylpyruvate dioxygenase [Cucurbita pepo subsp. pepo]
MSTRG.12848.1	Cp4.1LG20g07190	trans	uncharacterized protein LOC111783147 isoform X2 [Cucurbita pepo subsp. pepo]
MSTRG.12848.1	Cp4.1LG15g00260	trans	preprotein translocase subunit SCY2, chloroplastic [Cucurbita pepo subsp. pepo]
MSTRG.12848.1	Cp4.1LG05g05190	trans	peroxidase 2-like [Cucurbita pepo subsp. pepo]
MSTRG.12848.1	Cp4.1LG20g01820	trans	probable metal-nicotianamine transporter YSL5 isoform X1 [Cucurbita pepo subsp. pepo]
MSTRG.12848.1	Cp4.1LG02g15840	trans	porphobilinogen deaminase, chloroplastic-like [Cucurbita pepo subsp. pepo]
MSTRG.12848.1	Cp4.1LG02g05200	trans	uncharacterized protein LOC111788085 isoform X1 [Cucurbita pepo subsp. pepo]
MSTRG.12848.1	Cp4.1LG01g10520	trans	protein IN2-1 homolog B isoform X1 [Cucurbita pepo subsp. pepo]
MSTRG.12848.1	Cp4.1LG10g10030	trans	E3 ubiquitin-protein ligase UPL5-like [Cucurbita pepo subsp. pepo]
MSTRG.12848.1	Cp4.1LG19g02180	trans	cationic amino acid transporter 2, vacuolar-like [Cucurbita pepo subsp. pepo]
MSTRG.12848.1	Cp4.1LG10g00240	trans	chaperone protein dnaJ 11, chloroplastic-like [Cucurbita pepo subsp. pepo]
MSTRG.12848.1	Cp4.1LG05g12480	cis	uncharacterized protein LOC111451619 [Cucurbita moschata]
MSTRG.12848.1	Cp4.1LG04g06440	trans	DEAD-box ATP-dependent RNA helicase 41 [Cucurbita pepo subsp. pepo]
MSTRG.12848.1	Cp4.1LG16g03110	trans	triosephosphate isomerase, chloroplastic-like [Cucurbita pepo subsp. pepo]
MSTRG.12848.1	Cp4.1LG09g04580	trans	F-box/LRR-repeat protein At4g29420 [Cucurbita pepo subsp. pepo]
MSTRG.12848.1	Cp4.1LG10g10340	trans	rhodanese-like domain-containing protein 15, chloroplastic [Cucurbita pepo subsp. pepo]
MSTRG.12848.1	Cp4.1LG05g12440	cis	deSI-like protein At4g17486 [Cucurbita pepo subsp. pepo]
MSTRG.12848.1	Cp4.1LG02g07880	trans	filament-like plant protein 4 [Cucurbita pepo subsp. pepo]
MSTRG.12848.1	Cp4.1LG17g03020	trans	putative casein kinase II subunit beta-4 isoform X1 [Cucurbita pepo subsp. pepo]
MSTRG.12848.1	Cp4.1LG15g06030	trans	monooxygenase 2-like [Cucurbita pepo subsp. pepo]
MSTRG.12848.1	Cp4.1LG07g06020	trans	zinc transporter 4, chloroplastic-like [Cucurbita pepo subsp. pepo]
MSTRG.12848.1	Cp4.1LG08g05690	trans	transcription factor bHLH128-like [Cucurbita pepo subsp. pepo]
MSTRG.12848.1	Cp4.1LG08g02590	trans	glutamyl-tRNA reductase-binding protein, chloroplastic [Cucurbita pepo subsp. pepo]
MSTRG.12848.1	Cp4.1LG14g03290	trans	photosystem II 10 kDa polypeptide, chloroplastic [Cucurbita pepo subsp. pepo]
MSTRG.12848.1	Cp4.1LG18g06800	trans	mitogen-activated protein kinase 9 [Cucurbita pepo subsp. pepo]
MSTRG.12848.1	Cp4.1LG01g15730	trans	chloroplast sensor kinase, chloroplastic isoform X2 [Cucurbita pepo subsp. pepo]
MSTRG.12848.1	Cp4.1LG14g06050	trans	uncharacterized protein LOC111810680 [Cucurbita pepo subsp. pepo]
MSTRG.12848.1	Cp4.1LG10g00750	trans	probable NAD(P)H dehydrogenase (quinone) FQR1-like 2 [Cucurbita pepo subsp. pepo]
MSTRG.12848.1	Cp4.1LG09g08470	trans	uncharacterized protein LOC111802442 [Cucurbita pepo subsp. pepo]
MSTRG.12848.1	Cp4.1LG01g21590	trans	--
MSTRG.12848.1	Cp4.1LG10g06250	trans	photosystem I reaction center subunit psaK, chloroplastic [Cucurbita pepo subsp. pepo]
MSTRG.12848.1	Cp4.1LG13g00070	trans	uncharacterized protein LOC111808470 [Cucurbita pepo subsp. pepo]
MSTRG.12848.1	Cp4.1LG13g05090	trans	putative leucine-rich repeat-containing protein DDB_G0290503 isoform X1 [Cucurbita pepo subsp. pepo]
MSTRG.12848.1	Cp4.1LG17g01530	trans	40S ribosomal protein S3a-like [Cucurbita maxima]
MSTRG.12848.1	Cp4.1LG06g10250	trans	unnamed protein product, partial [Vitis vinifera]
MSTRG.12848.1	Cp4.1LG01g24930	trans	ACT domain-containing protein ACR12-like [Cucurbita pepo subsp. pepo]
MSTRG.12848.1	Cp4.1LG04g02360	trans	uncharacterized protein LOC111792185 [Cucurbita pepo subsp. pepo]
MSTRG.12848.1	Cp4.1LG05g12320	cis	uncharacterized protein LOC111794707 [Cucurbita pepo subsp. pepo]
MSTRG.12848.1	Cp4.1LG14g08150	trans	calcineurin B-like protein 3 [Cucurbita moschata]
MSTRG.12848.1	Cp4.1LG17g11070	trans	probable E3 ubiquitin-protein ligase ARI8 isoform X1 [Cucurbita pepo subsp. pepo]
MSTRG.12848.1	Cp4.1LG05g11390	trans	uncharacterized protein LOC111796164 isoform X1 [Cucurbita pepo subsp. pepo]
MSTRG.12848.1	Cp4.1LG01g17860	trans	uncharacterized protein LOC111799749 [Cucurbita pepo subsp. pepo]
MSTRG.12848.1	Cp4.1LG05g12290	cis	kinesin-like protein KIN-12D [Cucurbita pepo subsp. pepo]
MSTRG.12848.1	Cp4.1LG09g02860	trans	3-ketoacyl-CoA synthase 6 [Cucurbita pepo subsp. pepo]
MSTRG.12848.1	Cp4.1LG11g01500	trans	probable serine/threonine-protein kinase At1g01540 [Cucurbita pepo subsp. pepo]
MSTRG.12848.1	Cp4.1LG17g04210	trans	uncharacterized protein LOC111778406 [Cucurbita pepo subsp. pepo]
MSTRG.12848.1	Cp4.1LG11g00780	trans	uncharacterized protein LOC111805022 [Cucurbita pepo subsp. pepo]
MSTRG.12848.1	Cp4.1LG16g07090	trans	uncharacterized protein LOC111776947 [Cucurbita pepo subsp. pepo]
MSTRG.12848.1	Cp4.1LG14g09130	trans	50S ribosomal protein L19-1, chloroplastic-like [Cucurbita pepo subsp. pepo]
MSTRG.12848.1	Cp4.1LG09g08050	trans	protein SCAR3-like isoform X1 [Cucurbita pepo subsp. pepo]
MSTRG.12848.1	Cp4.1LG08g10670	trans	phosphatidylinositol 4-phosphate 5-kinase 9-like [Cucurbita pepo subsp. pepo]
MSTRG.12848.1	Cp4.1LG18g07030	trans	40S ribosomal protein S7-1-like [Cucurbita moschata]
MSTRG.12848.1	Cp4.1LG17g01240	trans	dual specificity protein phosphatase 1-like [Cucurbita pepo subsp. pepo]
MSTRG.12848.1	Cp4.1LG18g09260	trans	CASP-like protein 1F1 [Cucurbita pepo subsp. pepo]
MSTRG.12848.1	Cp4.1LG15g07730	trans	xyloglucan endotransglucosylase/hydrolase protein 9-like [Cucurbita pepo subsp. pepo]
MSTRG.12848.1	Cp4.1LG05g13150	trans	putative ER lumen protein-retaining receptor C28H8.4 [Cucurbita pepo subsp. pepo]
MSTRG.12848.1	Cp4.1LG14g04380	trans	alpha-L-fucosidase 2-like [Cucurbita pepo subsp. pepo]
MSTRG.12848.1	Cp4.1LG10g09280	trans	vesicle-associated protein 4-2-like [Cucurbita maxima]
MSTRG.12848.1	Cp4.1LG05g09640	trans	uncharacterized protein LOC111794394 isoform X2 [Cucurbita pepo subsp. pepo]
MSTRG.12848.1	Cp4.1LG10g12150	trans	kinesin-like protein KIN-7K, chloroplastic [Cucurbita pepo subsp. pepo]
MSTRG.12848.1	Cp4.1LG10g01540	trans	O-fucosyltransferase 39-like [Cucurbita pepo subsp. pepo]
MSTRG.12848.1	Cp4.1LG05g12230	cis	B3 domain-containing transcription factor VRN1-like [Cucurbita pepo subsp. pepo]
MSTRG.12848.1	Cp4.1LG03g06920	trans	ribonucleoside-diphosphate reductase small chain [Cucurbita pepo subsp. pepo]
MSTRG.12848.1	Cp4.1LG07g09210	trans	probable inactive purple acid phosphatase 29 [Cucurbita pepo subsp. pepo]
MSTRG.12848.1	Cp4.1LG20g02680	trans	protein NBR1 homolog [Cucurbita pepo subsp. pepo]
MSTRG.12848.1	Cp4.1LG05g11740	trans	F-box protein At5g67140 [Cucurbita pepo subsp. pepo]
MSTRG.12848.1	Cp4.1LG03g05800	trans	pyridoxal kinase-like [Cucurbita pepo subsp. pepo]
MSTRG.12848.1	Cp4.1LG01g21400	trans	probable LRR receptor-like serine/threonine-protein kinase At1g34110 [Cucurbita pepo subsp. pepo]
MSTRG.12848.1	Cp4.1LG15g05190	trans	NEDD8-conjugating enzyme Ubc12-like [Cucurbita maxima]
MSTRG.12848.1	Cp4.1LG19g01500	trans	putative zinc transporter At3g08650 [Cucurbita pepo subsp. pepo]
MSTRG.12848.1	Cp4.1LG04g11790	trans	protein ETHYLENE INSENSITIVE 3-like [Cucurbita pepo subsp. pepo]
MSTRG.12848.1	Cp4.1LG08g01530	trans	F-box protein PP2-A13-like [Cucurbita moschata]
MSTRG.12848.1	Cp4.1LG17g06760	trans	T-complex protein 1 subunit zeta 1 [Cucurbita pepo subsp. pepo]
MSTRG.12848.1	Cp4.1LG10g06840	trans	peptidyl-prolyl cis-trans isomerase FKBP13, chloroplastic isoform X2 [Cucurbita moschata]
MSTRG.12848.1	Cp4.1LG04g11490	trans	uncharacterized protein LOC111792591 [Cucurbita pepo subsp. pepo]
MSTRG.12848.1	Cp4.1LG16g06760	trans	UDP-glycosyltransferase 87A1-like [Cucurbita pepo subsp. pepo]
MSTRG.12848.1	Cp4.1LG02g06790	trans	protein RICE SALT SENSITIVE 3-like [Cucurbita pepo subsp. pepo]
MSTRG.12848.1	Cp4.1LG02g01650	trans	NAC domain-containing protein 72-like [Cucurbita pepo subsp. pepo]
MSTRG.12848.1	Cp4.1LG10g05780	trans	protein MEI2-like 5 isoform X2 [Cucurbita pepo subsp. pepo]
MSTRG.12848.1	Cp4.1LG01g21550	trans	ETHYLENE INSENSITIVE 3-like 1 protein [Cucurbita pepo subsp. pepo]
MSTRG.12848.1	Cp4.1LG05g12220	cis	cell division cycle-associated 7-like protein [Cucurbita pepo subsp. pepo]
MSTRG.12848.1	Cp4.1LG00g05180	trans	transcription initiation factor TFIID subunit 6-like isoform X1 [Cucurbita pepo subsp. pepo]
MSTRG.12848.1	Cp4.1LG05g12470	cis	probable NAD(P)H dehydrogenase (quinone) FQR1-like 1 [Cucurbita pepo subsp. pepo]
MSTRG.12848.1	Cp4.1LG16g06910	trans	probable inactive receptor kinase At5g58300 [Cucurbita pepo subsp. pepo]
MSTRG.12848.1	Cp4.1LG17g10020	trans	MACPF domain-containing protein At1g14780-like [Cucurbita pepo subsp. pepo]
MSTRG.12848.1	Cp4.1LG00g11820	trans	protein NDL2-like isoform X1 [Cucurbita pepo subsp. pepo]
MSTRG.12848.1	Cp4.1LG05g03520	trans	myosin-11-like isoform X1 [Cucurbita pepo subsp. pepo]
MSTRG.12848.1	Cp4.1LG13g00120	trans	SNARE-interacting protein KEULE-like isoform X1 [Cucurbita pepo subsp. pepo]
MSTRG.12848.1	Cp4.1LG05g12390	cis	probable E3 ubiquitin-protein ligase ARI2 [Cucurbita pepo subsp. pepo]
MSTRG.12848.1	Cp4.1LG16g04560	trans	thioredoxin domain-containing protein 9 homolog [Cucurbita pepo subsp. pepo]
MSTRG.12848.1	Cp4.1LG01g06240	trans	putative 1-phosphatidylinositol-3-phosphate 5-kinase FAB1C [Cucurbita pepo subsp. pepo]
MSTRG.12848.1	Cp4.1LG11g08090	trans	uncharacterized protein LOC111786710 [Cucurbita pepo subsp. pepo]
MSTRG.12848.1	Cp4.1LG02g05010	trans	aspartate aminotransferase, cytoplasmic [Cucurbita pepo subsp. pepo]
MSTRG.12848.1	Cp4.1LG01g00840	trans	hypothetical protein F8388_003973 [Cannabis sativa]
MSTRG.12848.1	Cp4.1LG02g09450	trans	60S ribosomal protein L3 [Cucurbita moschata]
MSTRG.12848.1	Cp4.1LG05g12300	cis	la-related protein 6C [Cucurbita pepo subsp. pepo]
MSTRG.12848.1	Cp4.1LG05g12210	cis	cold-regulated 413 plasma membrane protein 2-like [Cucurbita pepo subsp. pepo]
MSTRG.12848.1	Cp4.1LG05g12420	cis	--
MSTRG.12848.1	Cp4.1LG05g12260	cis	serine/threonine-protein kinase SRK2E-like isoform X1 [Cucurbita pepo subsp. pepo]
MSTRG.12848.1	Cp4.1LG20g05530	trans	nitrate regulatory gene2 protein-like [Cucurbita pepo subsp. pepo]
MSTRG.12848.1	Cp4.1LG16g01300	trans	LOW QUALITY PROTEIN: BTB/POZ domain-containing protein SR1IP1-like [Cucurbita pepo subsp. pepo]
MSTRG.12848.1	Cp4.1LG11g00670	trans	aldehyde dehydrogenase family 2 member B7, mitochondrial-like [Cucurbita pepo subsp. pepo]
MSTRG.12848.1	Cp4.1LG12g07490	trans	hypothetical protein DVH24_028997 [Malus domestica]
MSTRG.12848.1	Cp4.1LG13g10590	trans	40S ribosomal protein S25-3 [Cucurbita moschata]
MSTRG.12848.1	Cp4.1LG01g19900	trans	E3 ubiquitin-protein ligase SINA-like 10 [Cucurbita pepo subsp. pepo]
MSTRG.12848.1	Cp4.1LG01g07710	trans	protein TOM THREE HOMOLOG 1-like [Cucurbita pepo subsp. pepo]
MSTRG.12848.1	Cp4.1LG03g04340	trans	alpha-L-arabinofuranosidase 1-like isoform X1 [Cucurbita pepo subsp. pepo]
MSTRG.12848.1	Cp4.1LG05g12330	cis	protein ALP1-like [Cucurbita moschata]
MSTRG.12848.1	Cp4.1LG05g12360	cis	plastid division protein PDV2-like [Cucurbita pepo subsp. pepo]
MSTRG.12848.1	Cp4.1LG13g06000	trans	uncharacterized protein LOC111808971 [Cucurbita pepo subsp. pepo]
MSTRG.12848.1	Cp4.1LG04g14860	trans	geranylgeranyl diphosphate reductase, chloroplastic-like [Cucurbita pepo subsp. pepo]
MSTRG.12848.1	Cp4.1LG09g08020	trans	probable LRR receptor-like serine/threonine-protein kinase RFK1 [Cucurbita pepo subsp. pepo]
MSTRG.12848.1	Cp4.1LG11g03280	trans	EIN3-binding F-box protein 1-like [Cucurbita pepo subsp. pepo]
MSTRG.12848.1	Cp4.1LG12g01170	trans	cysteine-rich repeat secretory protein 3-like isoform X1 [Cucurbita pepo subsp. pepo]
MSTRG.12848.1	Cp4.1LG03g08730	trans	uncharacterized protein LOC111790839 isoform X1 [Cucurbita pepo subsp. pepo]
MSTRG.12848.1	Cp4.1LG02g15230	trans	deSI-like protein At4g17486 [Cucurbita moschata]
MSTRG.12848.1	Cp4.1LG16g02170	trans	cold-regulated 413 plasma membrane protein 2-like [Cucurbita pepo subsp. pepo]
MSTRG.12848.1	Cp4.1LG10g11030	trans	cationic amino acid transporter 2, vacuolar-like [Cucurbita pepo subsp. pepo]
MSTRG.12848.1	Cp4.1LG17g07310	trans	transmembrane protein 205 [Cucurbita moschata]
MSTRG.12848.1	Cp4.1LG13g09110	trans	uncharacterized protein LOC111489380 [Cucurbita maxima]
MSTRG.12848.1	Cp4.1LG10g03860	trans	transcription repressor OFP13-like [Cucurbita pepo subsp. pepo]
MSTRG.12848.1	Cp4.1LG05g12370	cis	polyol transporter 5-like [Cucurbita pepo subsp. pepo]
MSTRG.12848.1	Cp4.1LG08g10510	trans	E3 ubiquitin-protein ligase UPL7 isoform X1 [Cucurbita pepo subsp. pepo]
MSTRG.12848.1	Cp4.1LG03g16610	trans	ATG8-interacting protein 1-like [Cucurbita pepo subsp. pepo]
MSTRG.12848.1	Cp4.1LG18g05140	trans	putative clathrin assembly protein At5g35200 isoform X3 [Cucurbita pepo subsp. pepo]
MSTRG.12848.1	Cp4.1LG11g02310	trans	26S proteasome regulatory subunit S10B homolog B-like [Cucurbita pepo subsp. pepo]
MSTRG.12848.1	Cp4.1LG00g12150	trans	probable zinc metalloprotease EGY2, chloroplastic, partial [Cucurbita pepo subsp. pepo]
MSTRG.12848.1	Cp4.1LG08g07260	trans	transcription factor KUA1-like [Cucurbita pepo subsp. pepo]
MSTRG.12848.1	Cp4.1LG12g07530	trans	protein LURP-one-related 5-like [Cucurbita pepo subsp. pepo]
MSTRG.12848.1	Cp4.1LG03g11670	trans	putative E3 ubiquitin-protein ligase LIN-1 [Cucurbita pepo subsp. pepo]
MSTRG.12848.1	Cp4.1LG03g16020	trans	rho GTPase-activating protein 5-like [Cucurbita pepo subsp. pepo]
MSTRG.12848.1	Cp4.1LG05g02890	trans	superoxide dismutase [Cu-Zn], chloroplastic [Cucurbita pepo subsp. pepo]
MSTRG.12848.1	Cp4.1LG01g03740	trans	uncharacterized protein LOC111777455 [Cucurbita pepo subsp. pepo]
MSTRG.12848.1	Cp4.1LG05g12500	cis	UPF0496 protein At4g34320-like [Cucurbita pepo subsp. pepo]
MSTRG.12848.1	Cp4.1LG08g10540	trans	peptidyl-prolyl cis-trans isomerase FKBP16-4, chloroplastic-like [Cucurbita pepo subsp. pepo]
MSTRG.12848.1	Cp4.1LG01g18600	trans	65-kDa microtubule-associated protein 6-like [Cucurbita pepo subsp. pepo]
MSTRG.12848.1	Cp4.1LG16g03890	trans	uncharacterized protein LOC111776784 [Cucurbita pepo subsp. pepo]
MSTRG.12848.1	Cp4.1LG01g05800	trans	uroporphyrinogen decarboxylase-like [Cucurbita pepo subsp. pepo]
MSTRG.12848.1	Cp4.1LG08g01540	trans	F-box protein At4g00755-like [Cucurbita pepo subsp. pepo]
MSTRG.12848.1	Cp4.1LG04g11690	trans	60S ribosomal protein L30 [Cucurbita moschata]
MSTRG.12848.1	Cp4.1LG05g12350	cis	peroxidase 10-like [Cucurbita pepo subsp. pepo]
MSTRG.12848.1	Cp4.1LG05g12380	cis	plastid division protein PDV2-like [Cucurbita pepo subsp. pepo]
MSTRG.12848.1	Cp4.1LG05g04230	trans	protein TIC 100 [Cucurbita pepo subsp. pepo]
MSTRG.12848.1	Cp4.1LG01g16750	trans	cytochrome c [Cucurbita moschata]
MSTRG.12848.1	Cp4.1LG01g17350	trans	lycopene beta cyclase, chloroplastic/chromoplastic-like [Cucurbita pepo subsp. pepo]
MSTRG.12848.1	Cp4.1LG04g14890	trans	geranylgeranyl diphosphate reductase, chloroplastic-like [Cucurbita pepo subsp. pepo]
MSTRG.12848.1	Cp4.1LG03g09490	trans	biotin carboxyl carrier protein of acetyl-CoA carboxylase 2, chloroplastic-like [Cucurbita pepo subsp. pepo]
MSTRG.12848.1	Cp4.1LG03g03130	trans	mitochondrial succinate-fumarate transporter 1-like [Cucurbita pepo subsp. pepo]
MSTRG.12848.1	Cp4.1LG12g09130	trans	40S ribosomal protein S3-3-like [Cucurbita pepo subsp. pepo]
MSTRG.12848.1	Cp4.1LG05g12250	cis	hypothetical protein Csa_006080 [Cucumis sativus]
MSTRG.12848.1	Cp4.1LG18g06840	trans	uncharacterized GPI-anchored protein At4g28100-like [Cucurbita pepo subsp. pepo]
MSTRG.12848.1	Cp4.1LG12g09890	trans	NAC domain-containing protein 83-like [Cucurbita pepo subsp. pepo]
MSTRG.12848.1	Cp4.1LG08g10620	trans	60S ribosomal protein L24 [Cucurbita moschata]
MSTRG.12848.1	Cp4.1LG13g07410	trans	transcription factor bHLH51-like [Cucurbita pepo subsp. pepo]
MSTRG.12848.1	Cp4.1LG17g10670	trans	uncharacterized protein LOC111779335 [Cucurbita pepo subsp. pepo]
MSTRG.12848.1	Cp4.1LG05g13900	trans	scarecrow-like transcription factor PAT1 [Cucurbita pepo subsp. pepo]
MSTRG.12848.1	Cp4.1LG10g04500	trans	probable pectate lyase 12 [Cucurbita pepo subsp. pepo]
MSTRG.12848.1	Cp4.1LG18g07720	trans	CRM-domain containing factor CFM3, chloroplastic/mitochondrial-like [Cucurbita pepo subsp. pepo]
MSTRG.12848.1	Cp4.1LG01g15920	trans	ultraviolet-B receptor UVR8-like [Cucurbita pepo subsp. pepo]
MSTRG.12848.1	Cp4.1LG04g03690	trans	uncharacterized protein LOC111792345 [Cucurbita pepo subsp. pepo]
MSTRG.12848.1	Cp4.1LG05g12310	cis	uncharacterized protein LOC111795113 [Cucurbita pepo subsp. pepo]
MSTRG.12848.1	Cp4.1LG20g08540	trans	hypothetical protein PRUPE_6G080700 [Prunus persica]
MSTRG.12848.1	Cp4.1LG00g15140	trans	transcription factor bHLH63-like [Cucurbita pepo subsp. pepo]
MSTRG.12848.1	Cp4.1LG14g10500	trans	rab escort protein 1 [Cucurbita pepo subsp. pepo]
MSTRG.12848.1	Cp4.1LG19g08610	trans	protein S-acyltransferase 10-like [Cucurbita pepo subsp. pepo]
MSTRG.12848.1	Cp4.1LG05g12340	cis	salicylic acid-binding protein 2-like [Cucurbita pepo subsp. pepo]
MSTRG.12848.1	Cp4.1LG01g00120	trans	uncharacterized protein LOC111796709 isoform X1 [Cucurbita pepo subsp. pepo]
MSTRG.12848.1	Cp4.1LG08g04650	trans	uncharacterized protein LOC111800940 isoform X1 [Cucurbita pepo subsp. pepo]
MSTRG.12848.1	Cp4.1LG05g00110	trans	protein TORNADO 2-like [Cucurbita pepo subsp. pepo]
MSTRG.12848.1	Cp4.1LG06g01910	trans	aspartic proteinase-like protein 2 [Cucumis melo var. makuwa]
MSTRG.12848.1	Cp4.1LG06g06090	trans	uncharacterized protein LOC111796527 [Cucurbita pepo subsp. pepo]
MSTRG.12848.1	Cp4.1LG13g00040	trans	stromal 70 kDa heat shock-related protein, chloroplastic [Cucurbita pepo subsp. pepo]
MSTRG.12848.1	Cp4.1LG05g12110	cis	uncharacterized protein LOC111795878 [Cucurbita pepo subsp. pepo]
MSTRG.12848.1	Cp4.1LG06g06600	trans	30S ribosomal protein S20, chloroplastic-like [Cucurbita pepo subsp. pepo]
MSTRG.12848.1	Cp4.1LG05g12450	cis	phosphatidylinositol 4-kinase alpha 1-like [Cucurbita pepo subsp. pepo]
MSTRG.12848.1	Cp4.1LG20g08400	trans	uncharacterized protein LOC111464705 [Cucurbita moschata]
MSTRG.12848.1	Cp4.1LG02g05730	trans	3-ketoacyl-CoA synthase 10 [Cucurbita pepo subsp. pepo]
MSTRG.12848.1	Cp4.1LG01g24010	trans	photosynthetic NDH subunit of lumenal location 1, chloroplastic isoform X1 [Cucurbita pepo subsp. pepo]
MSTRG.12848.1	Cp4.1LG09g00360	trans	arabinogalactan peptide 22-like [Cucurbita moschata]
MSTRG.12848.1	Cp4.1LG06g03480	trans	EIN3-binding F-box protein 1-like [Cucurbita pepo subsp. pepo]
MSTRG.12848.1	Cp4.1LG05g12430	cis	CASP-like protein 5C1 [Cucurbita moschata]
MSTRG.12848.1	Cp4.1LG03g16100	trans	abscisic acid receptor PYL9-like [Cucurbita pepo subsp. pepo]
MSTRG.12848.1	Cp4.1LG01g16460	trans	60S ribosomal protein L5 [Cucurbita pepo subsp. pepo]
MSTRG.12848.1	Cp4.1LG07g11230	trans	topless-related protein 4-like isoform X2 [Cucurbita pepo subsp. pepo]
MSTRG.12848.1	Cp4.1LG05g12280	cis	extra-large guanine nucleotide-binding protein 1-like [Cucurbita pepo subsp. pepo]
MSTRG.12848.1	Cp4.1LG19g03780	trans	60S ribosomal protein L24-like [Cucurbita moschata]
MSTRG.12848.1	Cp4.1LG05g10890	trans	S-adenosylmethionine carrier 1, chloroplastic/mitochondrial [Cucurbita pepo subsp. pepo]
MSTRG.12848.1	Cp4.1LG02g03300	trans	phosphatidylinositol 4-phosphate 5-kinase 1-like [Cucurbita pepo subsp. pepo]
MSTRG.12848.1	Cp4.1LG05g12400	cis	dolichyl-diphosphooligosaccharide--protein glycosyltransferase 48 kDa subunit-like [Cucurbita maxima]
MSTRG.1322.1	Cp4.1LG04g00950	trans	protein RADIALIS-like 3 [Cucurbita pepo subsp. pepo]
MSTRG.1322.1	Cp4.1LG01g11990	trans	bZIP transcription factor 18-like [Cucurbita pepo subsp. pepo]
MSTRG.1322.1	Cp4.1LG00g09910	cis	neurofilament medium polypeptide-like [Cucurbita pepo subsp. pepo]
MSTRG.1322.1	Cp4.1LG00g09870	cis	uncharacterized protein LOC111446888 [Cucurbita moschata]
MSTRG.1322.1	Cp4.1LG00g09830	cis	high mobility group B protein 6-like [Cucurbita pepo subsp. pepo]
MSTRG.1322.1	Cp4.1LG00g09810	cis	uncharacterized protein LOC111801188 [Cucurbita pepo subsp. pepo]
MSTRG.1322.1	Cp4.1LG00g09900	cis	uncharacterized protein LOC111784948 [Cucurbita pepo subsp. pepo]
MSTRG.1322.1	Cp4.1LG00g09890	cis	uncharacterized protein LOC111785754 [Cucurbita pepo subsp. pepo]
MSTRG.1322.1	Cp4.1LG00g09800	cis	uncharacterized protein LOC111785925 [Cucurbita pepo subsp. pepo]
MSTRG.1322.1	Cp4.1LG00g09820	cis	probable GABA transporter 2 isoform X1 [Cucurbita pepo subsp. pepo]
MSTRG.1322.1	Cp4.1LG11g07780	trans	glycosyltransferase family 92 protein At1g27200-like [Cucurbita pepo subsp. pepo]
MSTRG.1322.1	Cp4.1LG00g09880	cis	5'-adenylylsulfate reductase-like 5, partial [Cucurbita pepo subsp. pepo]
MSTRG.1322.1	Cp4.1LG00g09850	cis	vesicle-associated protein 2-2-like isoform X1 [Cucurbita pepo subsp. pepo]
MSTRG.1322.1	Cp4.1LG00g09860	cis	ribosomal protein S1 [Cucurbita pepo]
MSTRG.1322.1	Cp4.1LG00g09840	cis	uncharacterized protein LOC111785289 isoform X3 [Cucurbita pepo subsp. pepo]
MSTRG.1322.1	Cp4.1LG00g09790	cis	bidirectional sugar transporter SWEET17-like [Cucurbita pepo subsp. pepo]
MSTRG.13273.1	Cp4.1LG16g05140	trans	uncharacterized protein LOC111777259 [Cucurbita pepo subsp. pepo]
MSTRG.13273.1	Cp4.1LG03g01220	trans	golgin subfamily A member 6-like protein 22 [Cucurbita pepo subsp. pepo]
MSTRG.13273.1	Cp4.1LG06g00190	cis	uncharacterized protein LOC111797306 [Cucurbita pepo subsp. pepo]
MSTRG.13273.1	Cp4.1LG06g00250	cis	O-fucosyltransferase 16 [Cucurbita pepo subsp. pepo]
MSTRG.13273.1	Cp4.1LG06g00450	cis	protein Simiate [Cucurbita pepo subsp. pepo]
MSTRG.13273.1	Cp4.1LG06g00480	cis	uncharacterized protein LOC111796959 isoform X1 [Cucurbita pepo subsp. pepo]
MSTRG.13273.1	Cp4.1LG06g00520	cis	protein FREE1-like [Cucurbita pepo subsp. pepo]
MSTRG.13273.1	Cp4.1LG01g08430	trans	transcription factor bHLH123-like [Cucurbita pepo subsp. pepo]
MSTRG.13273.1	Cp4.1LG06g00660	cis	thaumatin-like protein 1b [Cucurbita pepo subsp. pepo]
MSTRG.13273.1	Cp4.1LG18g09020	trans	snurportin-1 [Momordica charantia]
MSTRG.13273.1	Cp4.1LG19g12180	trans	uncharacterized protein LOC111005872 [Momordica charantia]
MSTRG.13273.1	Cp4.1LG06g00750	cis	--
MSTRG.13273.1	Cp4.1LG20g02930	trans	squamosa promoter-binding-like protein 13A [Cucurbita pepo subsp. pepo]
MSTRG.13273.1	Cp4.1LG06g00710	cis	ABC transporter B family member 13-like [Cucurbita pepo subsp. pepo]
MSTRG.13273.1	Cp4.1LG06g00240	cis	dolichol-phosphate mannosyltransferase subunit 1 [Cucurbita maxima]
MSTRG.13273.1	Cp4.1LG06g00440	cis	large proline-rich protein bag6-like [Cucurbita pepo subsp. pepo]
MSTRG.13273.1	Cp4.1LG06g00410	cis	tRNA pseudouridine synthase A [Cucurbita pepo subsp. pepo]
MSTRG.13273.1	Cp4.1LG06g00680	cis	uncharacterized protein LOC111796585 [Cucurbita pepo subsp. pepo]
MSTRG.13273.1	Cp4.1LG08g06110	trans	2-(3-amino-3-carboxypropyl)histidine synthase subunit 2 [Cucurbita pepo subsp. pepo]
MSTRG.13273.1	Cp4.1LG03g14240	trans	uncharacterized protein LOC111791361 [Cucurbita pepo subsp. pepo]
MSTRG.13273.1	Cp4.1LG06g00530	cis	prolyl endopeptidase-like [Cucurbita pepo subsp. pepo]
MSTRG.13273.1	Cp4.1LG06g00430	cis	F-box protein SKIP23-like [Cucurbita pepo subsp. pepo]
MSTRG.13273.1	Cp4.1LG17g07370	trans	CTP synthase-like isoform X1 [Cucurbita pepo subsp. pepo]
MSTRG.13273.1	Cp4.1LG06g00540	cis	calcium-dependent protein kinase 29 [Cucurbita pepo subsp. pepo]
MSTRG.13273.1	Cp4.1LG06g00720	cis	vacuolar protein sorting-associated protein 35B-like isoform X1 [Cucurbita pepo subsp. pepo]
MSTRG.13273.1	Cp4.1LG06g00360	cis	plastocyanin [Cucurbita pepo subsp. pepo]
MSTRG.13273.1	Cp4.1LG10g08390	trans	probable WRKY transcription factor 49 [Cucurbita pepo subsp. pepo]
MSTRG.13273.1	Cp4.1LG18g02030	trans	IQ domain-containing protein IQM2-like [Cucurbita pepo subsp. pepo]
MSTRG.13273.1	Cp4.1LG06g00390	cis	CO(2)-response secreted protease [Cucurbita pepo subsp. pepo]
MSTRG.13273.1	Cp4.1LG11g02840	trans	zinc finger CCCH domain-containing protein 22-like [Cucurbita pepo subsp. pepo]
MSTRG.13273.1	Cp4.1LG06g00510	cis	uncharacterized protein At1g76070, partial [Cucurbita pepo subsp. pepo]
MSTRG.13273.1	Cp4.1LG06g00300	cis	catalase isozyme 1-like [Cucurbita pepo subsp. pepo]
MSTRG.13273.1	Cp4.1LG06g00260	cis	cyclin-B2-4-like isoform X3 [Cucurbita pepo subsp. pepo]
MSTRG.13273.1	Cp4.1LG11g00790	trans	ethylene-responsive transcription factor ESR2 [Cucurbita pepo subsp. pepo]
MSTRG.13273.1	Cp4.1LG06g00280	cis	uncharacterized protein LOC111443294 [Cucurbita moschata]
MSTRG.13273.1	Cp4.1LG20g07400	trans	cyclin-dependent protein kinase inhibitor SMR2 [Cucumis melo var. makuwa]
MSTRG.13273.1	Cp4.1LG01g08900	trans	AP2-like ethylene-responsive transcription factor AIL6 [Cucurbita pepo subsp. pepo]
MSTRG.13273.1	Cp4.1LG06g00370	cis	uncharacterized protein LOC111796833 [Cucurbita pepo subsp. pepo]
MSTRG.13273.1	Cp4.1LG06g00270	cis	pentatricopeptide repeat-containing protein At1g76280 [Cucurbita pepo subsp. pepo]
MSTRG.13273.1	Cp4.1LG06g00200	cis	BTB/POZ domain-containing protein At2g30600 [Cucurbita pepo subsp. pepo]
MSTRG.13273.1	Cp4.1LG06g00490	cis	probable nucleoredoxin 2 [Cucurbita pepo subsp. pepo]
MSTRG.13273.1	Cp4.1LG06g00500	cis	mechanosensitive ion channel protein 8-like isoform X1 [Cucurbita pepo subsp. pepo]
MSTRG.13273.1	Cp4.1LG06g00320	cis	ATP-dependent zinc metalloprotease FTSH, chloroplastic-like [Cucurbita pepo subsp. pepo]
MSTRG.13273.1	Cp4.1LG19g08490	trans	thiosulfate sulfurtransferase 16, chloroplastic-like [Cucurbita pepo subsp. pepo]
MSTRG.13273.1	Cp4.1LG06g00210	cis	probable serine/threonine-protein kinase At4g35230 [Cucurbita pepo subsp. pepo]
MSTRG.13273.1	Cp4.1LG11g05830	trans	pleiotropic drug resistance protein 1-like [Cucurbita pepo subsp. pepo]
MSTRG.13273.1	Cp4.1LG15g01450	trans	wound-induced basic protein-like [Cucurbita moschata]
MSTRG.13273.1	Cp4.1LG06g00290	cis	NADH dehydrogenase [ubiquinone] 1 beta subcomplex subunit 2 [Cucurbita moschata]
MSTRG.13273.1	Cp4.1LG06g00350	cis	24-methylenesterol C-methyltransferase 2 [Cucurbita pepo subsp. pepo]
MSTRG.13273.1	Cp4.1LG07g03720	trans	auxin-responsive protein SAUR50-like [Cucurbita pepo subsp. pepo]
MSTRG.13273.1	Cp4.1LG06g00420	cis	ribonuclease P protein subunit p25-like protein [Cucurbita moschata]
MSTRG.13273.1	Cp4.1LG06g00460	cis	--
MSTRG.13273.1	Cp4.1LG06g00560	cis	uncharacterized protein LOC111797017 [Cucurbita pepo subsp. pepo]
MSTRG.13273.1	Cp4.1LG01g00900	trans	serine/threonine-protein kinase WAG1-like [Cucurbita pepo subsp. pepo]
MSTRG.13273.1	Cp4.1LG03g00490	trans	transcription repressor OFP6-like [Cucurbita pepo subsp. pepo]
MSTRG.13273.1	Cp4.1LG06g00590	cis	receptor protein kinase CLAVATA1-like [Cucurbita pepo subsp. pepo]
MSTRG.13273.1	Cp4.1LG17g03990	trans	transcription factor UNE10-like [Cucurbita pepo subsp. pepo]
MSTRG.13273.1	Cp4.1LG00g06820	trans	uncharacterized protein LOC111785364 isoform X1 [Cucurbita pepo subsp. pepo]
MSTRG.13273.1	Cp4.1LG10g08300	trans	mitogen-activated protein kinase-binding protein 1 isoform X2 [Cucumis melo var. makuwa]
MSTRG.13273.1	Cp4.1LG06g00380	cis	putative tRNA pseudouridine synthase Pus10 [Cucurbita pepo subsp. pepo]
MSTRG.13273.1	Cp4.1LG06g00550	cis	U11/U12 small nuclear ribonucleoprotein 25 kDa protein isoform X1 [Cucurbita moschata]
MSTRG.13273.1	Cp4.1LG06g00310	cis	small nuclear ribonucleoprotein SmD3b-like [Cucurbita moschata]
MSTRG.13273.1	Cp4.1LG06g00470	cis	4-coumarate--CoA ligase-like 5 [Cucurbita pepo subsp. pepo]
MSTRG.13273.1	Cp4.1LG13g00300	trans	basic leucine zipper 43-like [Cucurbita pepo subsp. pepo]
MSTRG.13273.1	Cp4.1LG17g02740	trans	pentatricopeptide repeat-containing protein At1g04840 [Cucurbita pepo subsp. pepo]
MSTRG.13273.1	Cp4.1LG03g11210	trans	CASP-like protein 1E2 [Cucurbita pepo subsp. pepo]
MSTRG.13273.1	Cp4.1LG01g08570	trans	uncharacterized protein LOC111799921 isoform X1 [Cucurbita pepo subsp. pepo]
MSTRG.13273.1	Cp4.1LG01g07360	trans	U-box domain-containing protein 21-like [Cucurbita pepo subsp. pepo]
MSTRG.13273.1	Cp4.1LG06g00400	cis	high mobility group B protein 9-like [Cucurbita pepo subsp. pepo]
MSTRG.13273.1	Cp4.1LG07g10590	trans	zinc finger CCCH domain-containing protein 20-like [Cucurbita pepo subsp. pepo]
MSTRG.13325.1	Cp4.1LG06g00940	cis	uncharacterized protein LOC111796541 [Cucurbita pepo subsp. pepo]
MSTRG.13325.1	Cp4.1LG06g01170	cis	protein RADIALIS-like 3 [Cucurbita maxima]
MSTRG.13325.1	Cp4.1LG06g01110	cis	COP9 signalosome complex subunit 4 [Cucurbita maxima]
MSTRG.13325.1	Cp4.1LG06g00930	cis	putative GTP-binding protein OBGC2 [Morella rubra]
MSTRG.13325.1	Cp4.1LG06g00860	cis	protein WALLS ARE THIN 1-like [Cucurbita pepo subsp. pepo]
MSTRG.13325.1	Cp4.1LG06g00840	cis	uncharacterized TPR repeat-containing protein At1g05150-like [Cucurbita pepo subsp. pepo]
MSTRG.13325.1	Cp4.1LG06g01080	cis	protein LIKE COV 1-like isoform X2 [Cucurbita moschata]
MSTRG.13325.1	Cp4.1LG06g01120	cis	probable ribosome biogenesis protein RLP24 [Cucurbita pepo subsp. pepo]
MSTRG.13325.1	Cp4.1LG06g01090	cis	50S ribosomal protein L31, chloroplastic [Cucurbita pepo subsp. pepo]
MSTRG.13325.1	Cp4.1LG06g01070	cis	sugar transporter ERD6-like 6 [Cucurbita moschata]
MSTRG.13325.1	Cp4.1LG06g01100	cis	mannan endo-1,4-beta-mannosidase 7-like [Cucurbita pepo subsp. pepo]
MSTRG.13325.1	Cp4.1LG06g01140	cis	maf-like protein DDB_G0281937 isoform X1 [Cucurbita pepo subsp. pepo]
MSTRG.13325.1	Cp4.1LG06g00880	cis	--
MSTRG.13325.1	Cp4.1LG06g01000	cis	protein RADIALIS-like 3 [Cucurbita moschata]
MSTRG.13325.1	Cp4.1LG06g01040	cis	glucose-1-phosphate adenylyltransferase large subunit 1-like isoform X1 [Cucurbita pepo subsp. pepo]
MSTRG.13325.1	Cp4.1LG06g01020	cis	tubby-like F-box protein 5 [Cucurbita pepo subsp. pepo]
MSTRG.13325.1	Cp4.1LG06g00830	cis	bifunctional nuclease 1-like [Cucurbita pepo subsp. pepo]
MSTRG.13325.1	Cp4.1LG06g01030	cis	uncharacterized protein LOC111797624 [Cucurbita pepo subsp. pepo]
MSTRG.13325.1	Cp4.1LG06g00920	cis	bZIP transcription factor 11-like [Cucurbita pepo subsp. pepo]
MSTRG.13325.1	Cp4.1LG06g00980	cis	--
MSTRG.13325.1	Cp4.1LG06g01160	cis	uncharacterized protein LOC111797309 [Cucurbita pepo subsp. pepo]
MSTRG.13325.1	Cp4.1LG06g00910	cis	uncharacterized protein LOC111796686 [Cucurbita pepo subsp. pepo]
MSTRG.13325.1	Cp4.1LG06g00900	cis	PREDICTED: AAA-ATPase At3g50940-like [Cucumis melo]
MSTRG.13325.1	Cp4.1LG06g00960	cis	beta-galactosidase 5-like [Cucurbita pepo subsp. pepo]
MSTRG.13325.1	Cp4.1LG06g01010	cis	outer envelope pore protein 24B, chloroplastic-like [Cucurbita pepo subsp. pepo]
MSTRG.13325.1	Cp4.1LG06g00890	cis	aldehyde oxidase GLOX-like [Cucurbita pepo subsp. pepo]
MSTRG.13325.1	Cp4.1LG06g00870	cis	uncharacterized protein LOC111796964 isoform X1 [Cucurbita pepo subsp. pepo]
MSTRG.13325.1	Cp4.1LG06g00990	cis	ornithine carbamoyltransferase, chloroplastic-like [Cucurbita pepo subsp. pepo]
MSTRG.13325.1	Cp4.1LG06g01150	cis	uncharacterized protein LOC111797614 [Cucurbita pepo subsp. pepo]
MSTRG.13325.1	Cp4.1LG06g00730	cis	auxin-induced protein 6B [Cucurbita pepo subsp. pepo]
MSTRG.13325.1	Cp4.1LG06g01130	cis	probable DNA-3-methyladenine glycosylase 2 [Cucurbita pepo subsp. pepo]
MSTRG.13325.1	Cp4.1LG10g08970	trans	dof zinc finger protein MNB1A-like [Cucurbita pepo subsp. pepo]
MSTRG.13325.1	Cp4.1LG06g00820	cis	thioredoxin H-type-like [Cucurbita maxima]
MSTRG.13325.1	Cp4.1LG06g00780	cis	transcription factor bHLH110 isoform X1 [Cucurbita pepo subsp. pepo]
MSTRG.13325.1	Cp4.1LG06g01180	cis	inositol-pentakisphosphate 2-kinase-like [Cucumis melo var. makuwa]
MSTRG.13325.1	Cp4.1LG06g00810	cis	uncharacterized protein LOC111796964 isoform X1 [Cucurbita pepo subsp. pepo]
MSTRG.13325.1	Cp4.1LG06g00950	cis	uncharacterized protein LOC111797318 [Cucurbita pepo subsp. pepo]
MSTRG.13325.1	Cp4.1LG06g00790	cis	fatty alcohol:caffeoyl-CoA acyltransferase-like [Cucurbita pepo subsp. pepo]
MSTRG.13325.1	Cp4.1LG06g00850	cis	AP-4 complex subunit mu [Cucurbita pepo subsp. pepo]
MSTRG.13325.1	Cp4.1LG06g01060	cis	glucan endo-1,3-beta-glucosidase 7-like [Cucurbita pepo subsp. pepo]
MSTRG.13325.1	Cp4.1LG06g01190	cis	--
MSTRG.13325.1	Cp4.1LG06g01050	cis	probable LRR receptor-like serine/threonine-protein kinase At2g16250 [Cucurbita pepo subsp. pepo]
MSTRG.13325.1	Cp4.1LG06g00970	cis	floral homeotic protein DEFICIENS-like [Cucurbita pepo subsp. pepo]
MSTRG.13325.1	Cp4.1LG06g00800	cis	auxin response factor 5-like isoform X2 [Cucurbita pepo subsp. pepo]
MSTRG.13653.8	Cp4.1LG06g04580	cis	uncharacterized protein LOC111443706 [Cucurbita moschata]
MSTRG.13653.8	Cp4.1LG06g04850	cis	PREDICTED: protein arginine N-methyltransferase 1.5 [Cucumis melo]
MSTRG.13653.8	Cp4.1LG06g04780	cis	guanine nucleotide-binding protein subunit gamma 2-like [Cucurbita pepo subsp. pepo]
MSTRG.13653.8	Cp4.1LG06g04680	cis	PREDICTED: ribosomal RNA small subunit methyltransferase H [Cucumis melo]
MSTRG.13653.8	Cp4.1LG06g04730	cis	--
MSTRG.13653.8	Cp4.1LG06g04710	cis	U-box domain-containing protein 35-like [Cucurbita pepo subsp. pepo]
MSTRG.13653.8	Cp4.1LG06g04890	cis	LOW QUALITY PROTEIN: protein FAM32A-like [Cucurbita pepo subsp. pepo]
MSTRG.13653.8	Cp4.1LG06g04590	cis	cytoplasmic 60S subunit biogenesis factor REI1 homolog 2-like isoform X1 [Cucurbita pepo subsp. pepo]
MSTRG.13653.8	Cp4.1LG06g04670	cis	cryptochrome DASH, chloroplastic/mitochondrial [Cucurbita pepo subsp. pepo]
MSTRG.13653.8	Cp4.1LG06g04470	cis	uncharacterized protein LOC111797019 [Cucurbita pepo subsp. pepo]
MSTRG.13653.8	Cp4.1LG06g04790	cis	rust resistance kinase Lr10-like [Cucurbita pepo subsp. pepo]
MSTRG.13653.8	Cp4.1LG06g04570	cis	probable sarcosine oxidase [Cucurbita pepo subsp. pepo]
MSTRG.13653.8	Cp4.1LG06g04750	cis	gamma-glutamylcyclotransferase 2-1-like [Cucurbita pepo subsp. pepo]
MSTRG.13653.8	Cp4.1LG06g04860	cis	fasciclin-like arabinogalactan protein 14 [Cucurbita pepo subsp. pepo]
MSTRG.13653.8	Cp4.1LG06g04820	cis	HBS1-like protein isoform X3 [Cucurbita pepo subsp. pepo]
MSTRG.13653.8	Cp4.1LG06g04870	cis	AIG2-like protein D [Cucurbita maxima]
MSTRG.13653.8	Cp4.1LG06g04740	cis	flowering-promoting factor 1-like protein 2 [Cucurbita pepo subsp. pepo]
MSTRG.13653.8	Cp4.1LG06g04810	cis	hypothetical protein CUMW_082140 [Citrus unshiu]
MSTRG.13653.8	Cp4.1LG06g04410	cis	glycosyltransferase family protein 64 C3 [Cucurbita pepo subsp. pepo]
MSTRG.13653.8	Cp4.1LG06g04660	cis	replication protein A 32 kDa subunit A-like [Cucurbita pepo subsp. pepo]
MSTRG.13653.8	Cp4.1LG06g04500	cis	uncharacterized protein LOC111797297 [Cucurbita pepo subsp. pepo]
MSTRG.13653.8	Cp4.1LG06g04420	cis	auxin-responsive protein SAUR71-like [Cucurbita pepo subsp. pepo]
MSTRG.13653.8	Cp4.1LG06g04800	cis	major antigen-like isoform X1 [Cucurbita pepo subsp. pepo]
MSTRG.13653.8	Cp4.1LG06g04840	cis	uncharacterized protein LOC111797673 [Cucurbita pepo subsp. pepo]
MSTRG.13653.8	Cp4.1LG06g04460	cis	L-arabinokinase-like [Cucurbita pepo subsp. pepo]
MSTRG.13653.8	Cp4.1LG06g04720	cis	trihelix transcription factor ASR3-like [Cucurbita pepo subsp. pepo]
MSTRG.13653.8	Cp4.1LG06g04700	cis	cryptochrome DASH, chloroplastic/mitochondrial-like [Cucurbita maxima]
MSTRG.13653.8	Cp4.1LG06g04760	cis	protein KAKU4-like [Cucurbita pepo subsp. pepo]
MSTRG.13653.8	Cp4.1LG06g04770	cis	uncharacterized protein LOC111797719 [Cucurbita pepo subsp. pepo]
MSTRG.13653.8	Cp4.1LG06g04640	cis	uncharacterized protein At2g24330-like [Cucurbita pepo subsp. pepo]
MSTRG.13653.8	Cp4.1LG06g04630	cis	uncharacterized protein LOC111797139 [Cucurbita pepo subsp. pepo]
MSTRG.13653.8	Cp4.1LG06g04690	cis	trihelix transcription factor ASR3-like [Cucurbita pepo subsp. pepo]
MSTRG.13653.8	Cp4.1LG06g04650	cis	pentatricopeptide repeat-containing protein At5g10690 isoform X1 [Cucurbita pepo subsp. pepo]
MSTRG.13653.8	Cp4.1LG06g04620	cis	probable WRKY transcription factor 11 [Cucurbita pepo subsp. pepo]
MSTRG.13653.8	Cp4.1LG06g04610	cis	probable xyloglucan glycosyltransferase 5 [Cucurbita pepo subsp. pepo]
MSTRG.13653.8	Cp4.1LG06g04830	cis	fasciclin-like arabinogalactan protein 14 [Cucurbita pepo subsp. pepo]
MSTRG.13653.8	Cp4.1LG06g04600	cis	calcium homeostasis endoplasmic reticulum protein isoform X1 [Cucurbita pepo subsp. pepo]
MSTRG.13653.8	Cp4.1LG06g04880	cis	--
MSTRG.13871.14	Cp4.1LG06g06060	cis	DNA topoisomerase 2-binding protein 1-A isoform X2 [Cucurbita pepo subsp. pepo]
MSTRG.13871.14	Cp4.1LG01g15220	trans	U-box domain-containing protein 19-like [Cucurbita pepo subsp. pepo]
MSTRG.13871.14	Cp4.1LG06g05950	cis	hypothetical protein Csa_011831 [Cucumis sativus]
MSTRG.13871.14	Cp4.1LG06g05890	cis	NAC domain-containing protein 21/22-like [Cucurbita pepo subsp. pepo]
MSTRG.13871.14	Cp4.1LG06g06040	cis	F-box protein SKIP31-like [Cucurbita pepo subsp. pepo]
MSTRG.13871.14	Cp4.1LG06g06050	cis	AP-4 complex subunit epsilon-like isoform X1 [Cucurbita pepo subsp. pepo]
MSTRG.13871.14	Cp4.1LG06g05860	cis	--
MSTRG.13871.14	Cp4.1LG06g05760	cis	protein PAT1 homolog 1-like [Cucurbita pepo subsp. pepo]
MSTRG.13871.14	Cp4.1LG06g05900	cis	uncharacterized protein LOC111797628 [Cucurbita pepo subsp. pepo]
MSTRG.13871.14	Cp4.1LG06g05920	cis	uncharacterized protein LOC111797696 [Cucurbita pepo subsp. pepo]
MSTRG.13871.14	Cp4.1LG06g06010	cis	WAT1-related protein At4g19185 isoform X1 [Cucurbita pepo subsp. pepo]
MSTRG.13871.14	Cp4.1LG06g06100	cis	floral homeotic protein PMADS 2-like isoform X1 [Cucurbita pepo subsp. pepo]
MSTRG.13871.14	Cp4.1LG06g05740	cis	probable membrane-associated kinase regulator 3 [Cucurbita pepo subsp. pepo]
MSTRG.13871.14	Cp4.1LG06g06000	cis	glutathione S-transferase TCHQD [Cucurbita pepo subsp. pepo]
MSTRG.13871.14	Cp4.1LG06g05820	cis	BTB/POZ domain-containing protein At1g04390 [Cucurbita pepo subsp. pepo]
MSTRG.13871.14	Cp4.1LG06g05840	cis	uncharacterized protein LOC111796673 [Cucurbita pepo subsp. pepo]
MSTRG.13871.14	Cp4.1LG06g05790	cis	uncharacterized protein LOC111796453 [Cucurbita pepo subsp. pepo]
MSTRG.13871.14	Cp4.1LG06g06030	cis	ABC transporter E family member 2-like [Cucurbita pepo subsp. pepo]
MSTRG.13871.14	Cp4.1LG06g06120	cis	arabinosyltransferase XEG113-like [Cucurbita pepo subsp. pepo]
MSTRG.13871.14	Cp4.1LG06g05720	cis	pentatricopeptide repeat-containing protein At1g79080, chloroplastic-like [Cucurbita pepo subsp. pepo]
MSTRG.13871.14	Cp4.1LG06g05870	cis	uncharacterized protein LOC111796718 [Cucurbita pepo subsp. pepo]
MSTRG.13871.14	Cp4.1LG06g06090	cis	uncharacterized protein LOC111796527 [Cucurbita pepo subsp. pepo]
MSTRG.13871.14	Cp4.1LG02g16430	trans	--
MSTRG.13871.14	Cp4.1LG06g05930	cis	uncharacterized protein LOC111796557 [Cucurbita pepo subsp. pepo]
MSTRG.13871.14	Cp4.1LG06g05880	cis	long-chain-alcohol oxidase FAO4A-like [Cucurbita pepo subsp. pepo]
MSTRG.13871.14	Cp4.1LG06g05940	cis	carbon catabolite repressor protein 4 homolog 4 isoform X1 [Cucurbita pepo subsp. pepo]
MSTRG.13871.14	Cp4.1LG06g05970	cis	rop guanine nucleotide exchange factor 14-like isoform X1 [Cucurbita pepo subsp. pepo]
MSTRG.13871.14	Cp4.1LG06g05960	cis	uncharacterized protein LOC111797700 isoform X1 [Cucurbita pepo subsp. pepo]
MSTRG.13871.14	Cp4.1LG06g05980	cis	alkylated DNA repair protein alkB homolog 8 [Cucurbita pepo subsp. pepo]
MSTRG.13871.14	Cp4.1LG06g05910	cis	LRR receptor-like serine/threonine-protein kinase FEI 1 isoform X2 [Cucurbita pepo subsp. pepo]
MSTRG.13871.14	Cp4.1LG07g04550	trans	MYB8 [Cucurbita pepo]
MSTRG.14071.7	Cp4.1LG06g08940	cis	heat shock 70 kDa protein 16-like [Cucurbita pepo subsp. pepo]
MSTRG.14071.7	Cp4.1LG06g08880	cis	SUI1 domain-containing protein [Cucumis melo var. makuwa]
MSTRG.14071.7	Cp4.1LG06g08870	cis	ubiquitin thioesterase OTU1-like isoform X1 [Cucurbita pepo subsp. pepo]
MSTRG.14071.7	Cp4.1LG06g09100	cis	microtubule-associated protein TORTIFOLIA1-like [Cucurbita pepo subsp. pepo]
MSTRG.14071.7	Cp4.1LG06g08740	cis	GDP-L-galactose phosphorylase 1-like [Cucurbita pepo subsp. pepo]
MSTRG.14071.7	Cp4.1LG06g08800	cis	transcriptional adapter ADA2a-like isoform X2 [Cucurbita pepo subsp. pepo]
MSTRG.14071.7	Cp4.1LG06g08890	cis	NEP1-interacting protein-like 2 [Cucurbita pepo subsp. pepo]
MSTRG.14071.7	Cp4.1LG06g09030	cis	uncharacterized protein LOC111797670 [Cucurbita pepo subsp. pepo]
MSTRG.14071.7	Cp4.1LG06g08760	cis	prohibitin-1, mitochondrial-like [Cucurbita pepo subsp. pepo]
MSTRG.14071.7	Cp4.1LG06g08830	cis	uncharacterized protein LOC111797410 [Cucurbita pepo subsp. pepo]
MSTRG.14071.7	Cp4.1LG06g08750	cis	1,4-alpha-glucan-branching enzyme 3, chloroplastic/amyloplastic [Cucurbita pepo subsp. pepo]
MSTRG.14071.7	Cp4.1LG06g08900	cis	uncharacterized protein LOC111797411 [Cucurbita pepo subsp. pepo]
MSTRG.14071.7	Cp4.1LG06g08990	cis	septum-promoting GTP-binding protein 1 [Cucurbita pepo subsp. pepo]
MSTRG.14071.7	Cp4.1LG06g08780	cis	CCR4-NOT transcription complex subunit 9-like [Cucurbita moschata]
MSTRG.14071.7	Cp4.1LG06g08850	cis	uncharacterized protein LOC111796952 [Cucurbita pepo subsp. pepo]
MSTRG.14071.7	Cp4.1LG06g08810	cis	uncharacterized protein LOC111796534 [Cucurbita pepo subsp. pepo]
MSTRG.14071.7	Cp4.1LG06g08920	cis	inner centromere protein-like [Cucurbita pepo subsp. pepo]
MSTRG.14071.7	Cp4.1LG06g08790	cis	grpE protein homolog 2, mitochondrial-like isoform X1 [Cucurbita pepo subsp. pepo]
MSTRG.14071.7	Cp4.1LG06g08950	cis	--
MSTRG.14071.7	Cp4.1LG06g08820	cis	heterodimeric geranylgeranyl pyrophosphate synthase small subunit, chloroplastic-like [Cucurbita pepo subsp. pepo]
MSTRG.14071.7	Cp4.1LG06g08910	cis	uncharacterized protein LOC111797060 isoform X1 [Cucurbita pepo subsp. pepo]
MSTRG.14071.7	Cp4.1LG06g08720	cis	unnamed protein product [Microthlaspi erraticum]
MSTRG.14071.7	Cp4.1LG06g08840	cis	purple acid phosphatase 18-like [Cucurbita pepo subsp. pepo]
MSTRG.14071.7	Cp4.1LG06g08930	cis	CRS2-associated factor 2, mitochondrial [Cucurbita pepo subsp. pepo]
MSTRG.14071.7	Cp4.1LG06g08860	cis	taxadiene 5-alpha hydroxylase-like [Cucurbita pepo subsp. pepo]
MSTRG.14071.7	Cp4.1LG06g09140	cis	uncharacterized protein LOC111796871 isoform X5 [Cucurbita pepo subsp. pepo]
MSTRG.14071.7	Cp4.1LG06g08770	cis	dihydrolipoyllysine-residue succinyltransferase component of 2-oxoglutarate dehydrogenase complex 1, mitochondrial-like [Cucurbita pepo subsp. pepo]
MSTRG.14150.1	Cp4.1LG07g08090	trans	histone-lysine N-methyltransferase SUVR4-like [Cucurbita pepo subsp. pepo]
MSTRG.14150.1	Cp4.1LG03g03880	trans	protein STRUBBELIG-RECEPTOR FAMILY 2-like [Cucurbita pepo subsp. pepo]
MSTRG.14150.1	Cp4.1LG13g10360	trans	uncharacterized protein LOC111809302 [Cucurbita pepo subsp. pepo]
MSTRG.14150.1	Cp4.1LG19g07330	trans	squamosa promoter-binding-like protein 3 [Cucurbita pepo subsp. pepo]
MSTRG.14150.1	Cp4.1LG08g00690	trans	proline-rich receptor-like protein kinase PERK2 [Momordica charantia]
MSTRG.14150.1	Cp4.1LG17g04740	trans	LOB domain-containing protein 28-like, partial [Cucurbita pepo subsp. pepo]
MSTRG.14150.1	Cp4.1LG06g07690	trans	alcohol dehydrogenase 1 [Cucurbita pepo subsp. pepo]
MSTRG.14150.1	Cp4.1LG18g04820	trans	hypothetical protein E6C27_scaffold216G00760 [Cucumis melo var. makuwa]
MSTRG.14150.1	Cp4.1LG02g15420	trans	homeobox-leucine zipper protein HOX11-like [Cucurbita pepo subsp. pepo]
MSTRG.14150.1	Cp4.1LG00g10100	trans	adenylate isopentenyltransferase 5, chloroplastic-like [Cucurbita pepo subsp. pepo]
MSTRG.14150.1	Cp4.1LG04g04380	trans	protein THYLAKOID ASSEMBLY 8-like, chloroplastic [Cucurbita moschata]
MSTRG.14150.1	Cp4.1LG10g09950	trans	microtubule-associated protein 70-5 isoform X1 [Cucurbita pepo subsp. pepo]
MSTRG.14150.1	Cp4.1LG06g08210	cis	uncharacterized protein LOC111797567 [Cucurbita pepo subsp. pepo]
MSTRG.14150.1	Cp4.1LG02g05320	trans	probable pectinesterase/pectinesterase inhibitor 20 isoform X1 [Cucurbita pepo subsp. pepo]
MSTRG.14150.1	Cp4.1LG04g11130	trans	serine/threonine-protein kinase RIPK-like [Cucurbita pepo subsp. pepo]
MSTRG.14150.1	Cp4.1LG12g05720	trans	universal stress protein PHOS34 [Cucumis sativus]
MSTRG.14150.1	Cp4.1LG10g04380	trans	S-adenosylmethionine synthase 3-like [Cucurbita moschata]
MSTRG.14150.1	Cp4.1LG03g09020	trans	--
MSTRG.14150.1	Cp4.1LG20g04240	trans	uncharacterized protein LOC111783524 [Cucurbita pepo subsp. pepo]
MSTRG.14150.1	Cp4.1LG01g04590	trans	uncharacterized protein LOC111811511 [Cucurbita pepo subsp. pepo]
MSTRG.14150.1	Cp4.1LG18g06730	trans	uncharacterized protein LOC111779661 [Cucurbita pepo subsp. pepo]
MSTRG.14150.1	Cp4.1LG06g06240	trans	PREDICTED: aspartic proteinase Asp1-like [Cucumis melo]
MSTRG.14150.1	Cp4.1LG06g08290	cis	peptidyl-prolyl cis-trans isomerase FKBP16-1, chloroplastic isoform X1 [Cucurbita pepo subsp. pepo]
MSTRG.14150.1	Cp4.1LG06g05180	trans	nitrate reductase [NADH]-like [Cucurbita pepo subsp. pepo]
MSTRG.14150.1	Cp4.1LG19g04740	trans	probable carboxylesterase 15 [Cucurbita pepo subsp. pepo]
MSTRG.14150.1	Cp4.1LG06g08250	cis	protein transport protein SFT2-like [Cucurbita pepo subsp. pepo]
MSTRG.14150.1	Cp4.1LG08g07980	trans	putative disease resistance protein RGA3 [Cucurbita pepo subsp. pepo]
MSTRG.14150.1	Cp4.1LG19g11350	trans	hypothetical protein Csa_004238, partial [Cucumis sativus]
MSTRG.14150.1	Cp4.1LG02g07940	trans	auxin-induced protein 6B-like [Cucurbita pepo subsp. pepo]
MSTRG.14150.1	Cp4.1LG05g05510	trans	hypothetical protein Csa_021665 [Cucumis sativus]
MSTRG.14150.1	Cp4.1LG01g00160	trans	protein LURP-one-related 17-like [Cucurbita pepo subsp. pepo]
MSTRG.14150.1	Cp4.1LG06g08020	cis	chaperone protein ClpD, chloroplastic-like [Cucurbita pepo subsp. pepo]
MSTRG.14150.1	Cp4.1LG12g05900	trans	probable pectinesterase/pectinesterase inhibitor 7 [Cucurbita moschata]
MSTRG.14150.1	Cp4.1LG15g01280	trans	protein SULFUR DEFICIENCY-INDUCED 1-like isoform X2 [Cucurbita moschata]
MSTRG.14150.1	Cp4.1LG06g08050	cis	GPI-anchored protein LLG1-like [Ipomoea triloba]
MSTRG.14150.1	Cp4.1LG12g04980	trans	--
MSTRG.14150.1	Cp4.1LG18g06440	trans	sodium transporter HKT1 [Cucurbita pepo subsp. pepo]
MSTRG.14150.1	Cp4.1LG00g10690	trans	--
MSTRG.14150.1	Cp4.1LG02g06410	trans	uncharacterized protein LOC111788307 [Cucurbita pepo subsp. pepo]
MSTRG.14150.1	Cp4.1LG04g13930	trans	pentatricopeptide repeat-containing protein At4g02750-like [Cucurbita pepo subsp. pepo]
MSTRG.14150.1	Cp4.1LG06g02130	trans	hypothetical protein E6C27_scaffold255G001830 [Cucumis melo var. makuwa]
MSTRG.14150.1	Cp4.1LG02g14060	trans	probable carboxylesterase 17 [Cucurbita pepo subsp. pepo]
MSTRG.14150.1	Cp4.1LG08g10780	trans	flavanone 3-dioxygenase 2-like [Cucurbita pepo subsp. pepo]
MSTRG.14150.1	Cp4.1LG08g06910	trans	protein MIZU-KUSSEI 1-like [Cucurbita pepo subsp. pepo]
MSTRG.14150.1	Cp4.1LG06g08150	cis	uncharacterized protein LOC111796870 [Cucurbita pepo subsp. pepo]
MSTRG.14150.1	Cp4.1LG06g08060	cis	uncharacterized protein LOC111797152 [Cucurbita pepo subsp. pepo]
MSTRG.14150.1	Cp4.1LG20g08570	trans	uncharacterized protein LOC111783248 [Cucurbita pepo subsp. pepo]
MSTRG.14150.1	Cp4.1LG00g08450	trans	la-related protein 1C-like, partial [Cucurbita pepo subsp. pepo]
MSTRG.14150.1	Cp4.1LG13g03730	trans	chaperone protein DnaJ-like isoform X1 [Cucurbita maxima]
MSTRG.14150.1	Cp4.1LG06g08100	cis	carbamoyl-phosphate synthase large chain, chloroplastic-like [Cucurbita pepo subsp. pepo]
MSTRG.14150.1	Cp4.1LG00g13970	trans	uncharacterized protein LOC111493667 [Cucurbita maxima]
MSTRG.14150.1	Cp4.1LG08g06690	trans	transcription termination factor MTERF4, chloroplastic-like [Cucurbita maxima]
MSTRG.14150.1	Cp4.1LG06g01520	trans	hypothetical protein E5676_scaffold134G003590 [Cucumis melo var. makuwa]
MSTRG.14150.1	Cp4.1LG01g16840	trans	MDIS1-interacting receptor like kinase 2-like [Cucurbita pepo subsp. pepo]
MSTRG.14150.1	Cp4.1LG00g13940	trans	uncharacterized protein At5g39570-like, partial [Cucurbita pepo subsp. pepo]
MSTRG.14150.1	Cp4.1LG10g07740	trans	transcription factor LAX PANICLE 1 [Cucurbita pepo subsp. pepo]
MSTRG.14150.1	Cp4.1LG06g07970	cis	uncharacterized protein At4g26450-like isoform X2 [Cucurbita pepo subsp. pepo]
MSTRG.14150.1	Cp4.1LG13g03070	trans	bidirectional sugar transporter SWEET3b-like [Cucurbita pepo subsp. pepo]
MSTRG.14150.1	Cp4.1LG06g08160	cis	uncharacterized protein LOC111796953 isoform X1 [Cucurbita pepo subsp. pepo]
MSTRG.14150.1	Cp4.1LG06g08180	cis	--
MSTRG.14150.1	Cp4.1LG01g12640	trans	probable pectate lyase P59 [Cucurbita pepo subsp. pepo]
MSTRG.14150.1	Cp4.1LG04g05380	trans	polygalacturonase At1g48100 [Cucurbita pepo subsp. pepo]
MSTRG.14150.1	Cp4.1LG20g05960	trans	--
MSTRG.14150.1	Cp4.1LG03g18130	trans	uncharacterized protein LOC101206663 isoform X1 [Cucumis sativus]
MSTRG.14150.1	Cp4.1LG10g08770	trans	uncharacterized protein LOC111803972 [Cucurbita pepo subsp. pepo]
MSTRG.14150.1	Cp4.1LG06g08030	cis	phosphatidylinositol/phosphatidylcholine transfer protein SFH13-like [Cucurbita pepo subsp. pepo]
MSTRG.14150.1	Cp4.1LG01g03330	trans	60S ribosomal protein L13-1 [Cucurbita maxima]
MSTRG.14150.1	Cp4.1LG04g06260	trans	mitochondrial phosphate carrier protein 3, mitochondrial-like [Cucurbita pepo subsp. pepo]
MSTRG.14150.1	Cp4.1LG17g09880	trans	pentatricopeptide repeat-containing protein At3g61520, mitochondrial-like [Cucurbita pepo subsp. pepo]
MSTRG.14150.1	Cp4.1LG17g08210	trans	zinc finger protein WIP2-like [Cucurbita pepo subsp. pepo]
MSTRG.14150.1	Cp4.1LG03g02210	trans	RING-H2 finger protein ATL33-like [Cucurbita pepo subsp. pepo]
MSTRG.14150.1	Cp4.1LG06g08220	cis	hypothetical protein Csa_015645 [Cucumis sativus]
MSTRG.14150.1	Cp4.1LG03g01050	trans	dehydration-responsive element-binding protein 1B-like [Cucurbita pepo subsp. pepo]
MSTRG.14150.1	Cp4.1LG04g16010	trans	cytochrome P450 71A22-like [Cucurbita maxima]
MSTRG.14150.1	Cp4.1LG10g04110	trans	GDSL esterase/lipase At5g03610-like [Cucurbita pepo subsp. pepo]
MSTRG.14150.1	Cp4.1LG05g00550	trans	seed nucellus-specific protein [Citrullus lanatus]
MSTRG.14150.1	Cp4.1LG13g08230	trans	uncharacterized protein LOC111808481 isoform X1 [Cucurbita pepo subsp. pepo]
MSTRG.14150.1	Cp4.1LG02g14530	trans	uncharacterized protein LOC111788674 [Cucurbita pepo subsp. pepo]
MSTRG.14150.1	Cp4.1LG06g08130	cis	hypothetical protein Csa_016708 [Cucumis sativus]
MSTRG.14150.1	Cp4.1LG03g03850	trans	3,9-dihydroxypterocarpan 6A-monooxygenase [Cucurbita pepo subsp. pepo]
MSTRG.14150.1	Cp4.1LG02g13250	trans	uncharacterized protein LOC111788468 [Cucurbita pepo subsp. pepo]
MSTRG.14150.1	Cp4.1LG04g12950	trans	uncharacterized protein LOC111793719 [Cucurbita pepo subsp. pepo]
MSTRG.14150.1	Cp4.1LG16g05720	trans	putative WUSCHEL-related homeobox 2 [Cucurbita moschata]
MSTRG.14150.1	Cp4.1LG09g09160	trans	probable beta-1,3-galactosyltransferase 2 [Cucurbita pepo subsp. pepo]
MSTRG.14150.1	Cp4.1LG04g13870	trans	probable glutathione S-transferase [Cucurbita pepo subsp. pepo]
MSTRG.14150.1	Cp4.1LG02g02670	trans	transcription factor JUNGBRUNNEN 1-like [Cucurbita pepo subsp. pepo]
MSTRG.14150.1	Cp4.1LG09g09660	trans	uncharacterized protein LOC111802535 [Cucurbita pepo subsp. pepo]
MSTRG.14150.1	Cp4.1LG10g03040	trans	probable WRKY transcription factor 12 [Cucurbita pepo subsp. pepo]
MSTRG.14150.1	Cp4.1LG20g04050	trans	hypothetical protein FH972_000343 [Carpinus fangiana]
MSTRG.14150.1	Cp4.1LG06g08230	cis	LRR receptor-like serine/threonine-protein kinase [Cucurbita moschata]
MSTRG.14150.1	Cp4.1LG12g08540	trans	probable protein phosphatase 2C 6 [Cucurbita pepo subsp. pepo]
MSTRG.14150.1	Cp4.1LG01g07750	trans	MLP-like protein 329 [Cucurbita pepo subsp. pepo]
MSTRG.14150.1	Cp4.1LG13g09500	trans	uncharacterized protein LOC111808373 isoform X2 [Cucurbita pepo subsp. pepo]
MSTRG.14150.1	Cp4.1LG06g08120	cis	Uridine kinase-like protein 4 [Pyrus ussuriensis x Pyrus communis]
MSTRG.14150.1	Cp4.1LG06g08090	cis	BTB/POZ domain-containing protein At1g55760-like [Cucurbita pepo subsp. pepo]
MSTRG.14150.1	Cp4.1LG01g24470	trans	hypothetical protein Csa_004317 [Cucumis sativus]
MSTRG.14150.1	Cp4.1LG00g04400	trans	protein NETWORKED 4A-like [Cucurbita moschata]
MSTRG.14150.1	Cp4.1LG19g00390	trans	zeatin O-xylosyltransferase-like, partial [Cucurbita pepo subsp. pepo]
MSTRG.14150.1	Cp4.1LG06g02040	trans	uncharacterized protein LOC111796841 [Cucurbita pepo subsp. pepo]
MSTRG.14150.1	Cp4.1LG06g08070	cis	DNA damage-inducible protein 1 isoform X1 [Cucurbita pepo subsp. pepo]
MSTRG.14150.1	Cp4.1LG06g08080	cis	uncharacterized protein At4g26485 isoform X2 [Cucurbita moschata]
MSTRG.14150.1	Cp4.1LG02g13910	trans	developmental protein SEPALLATA 1-like [Cucurbita moschata]
MSTRG.14150.1	Cp4.1LG19g10190	trans	transcription factor bHLH19-like [Cucurbita pepo subsp. pepo]
MSTRG.14150.1	Cp4.1LG19g06930	trans	WUSCHEL-related homeobox 9-like [Cucurbita pepo subsp. pepo]
MSTRG.14150.1	Cp4.1LG02g11330	trans	probable LRR receptor-like serine/threonine-protein kinase At1g06840 [Cucurbita pepo subsp. pepo]
MSTRG.14150.1	Cp4.1LG01g22040	trans	cytokinin hydroxylase-like [Cucurbita pepo subsp. pepo]
MSTRG.14150.1	Cp4.1LG18g00220	trans	probable glucan endo-1,3-beta-glucosidase BG5 [Cucurbita moschata]
MSTRG.14150.1	Cp4.1LG11g01060	trans	phytosulfokines-like [Cucurbita pepo subsp. pepo]
MSTRG.14150.1	Cp4.1LG06g08270	cis	E3 ubiquitin-protein ligase At4g11680-like [Cucurbita pepo subsp. pepo]
MSTRG.14150.1	Cp4.1LG19g10090	trans	transcription factor bHLH131-like [Cucurbita pepo subsp. pepo]
MSTRG.14150.1	Cp4.1LG07g03370	trans	ornithine decarboxylase-like [Cucurbita pepo subsp. pepo]
MSTRG.14150.1	Cp4.1LG08g13420	trans	putative pectinesterase/pectinesterase inhibitor 45 [Cucurbita pepo subsp. pepo]
MSTRG.14150.1	Cp4.1LG00g11010	trans	17.3 kDa class I heat shock protein-like [Cucurbita pepo subsp. pepo]
MSTRG.14150.1	Cp4.1LG02g15560	trans	arabinogalactan peptide 23-like [Cucurbita maxima]
MSTRG.14150.1	Cp4.1LG20g07830	trans	uncharacterized protein LOC111782699 [Cucurbita pepo subsp. pepo]
MSTRG.14150.1	Cp4.1LG11g07650	trans	protein NRT1/ PTR FAMILY 4.6-like [Cucurbita pepo subsp. pepo]
MSTRG.14150.1	Cp4.1LG12g01330	trans	hypothetical protein E6C27_scaffold560G00040 [Cucumis melo var. makuwa]
MSTRG.14150.1	Cp4.1LG06g08190	cis	kinesin-like protein KIN-14F [Cucurbita pepo subsp. pepo]
MSTRG.14150.1	Cp4.1LG01g01680	trans	protein CUP-SHAPED COTYLEDON 2-like [Cucurbita pepo subsp. pepo]
MSTRG.14150.1	Cp4.1LG06g08110	cis	probable galactinol--sucrose galactosyltransferase 1 [Cucurbita pepo subsp. pepo]
MSTRG.14150.1	Cp4.1LG20g04350	trans	dof zinc finger protein 1-like [Cucurbita pepo subsp. pepo]
MSTRG.14150.1	Cp4.1LG03g11810	trans	UPF0481 protein At3g47200-like [Cucurbita pepo subsp. pepo]
MSTRG.14150.1	Cp4.1LG01g02130	trans	basic blue protein-like [Cucurbita pepo subsp. pepo]
MSTRG.14150.1	Cp4.1LG06g08140	cis	KH domain-containing protein At5g56140-like [Cucurbita maxima]
MSTRG.14150.1	Cp4.1LG01g23010	trans	phytolongin Phyl2.2-like [Cucurbita pepo subsp. pepo]
MSTRG.14150.1	Cp4.1LG04g00840	trans	BURP domain protein USPL1-like [Cucurbita pepo subsp. pepo]
MSTRG.14150.1	Cp4.1LG06g00790	trans	fatty alcohol:caffeoyl-CoA acyltransferase-like [Cucurbita pepo subsp. pepo]
MSTRG.14150.1	Cp4.1LG11g07510	trans	uncharacterized protein LOC111806010 [Cucurbita pepo subsp. pepo]
MSTRG.14150.1	Cp4.1LG04g13220	trans	plasma membrane ATPase 4-like isoform X2 [Cucurbita pepo subsp. pepo]
MSTRG.14150.1	Cp4.1LG18g04970	trans	mitogen-activated protein kinase kinase kinase 17-like [Cucurbita pepo subsp. pepo]
MSTRG.14150.1	Cp4.1LG06g08280	cis	E3 ubiquitin-protein ligase At4g11680-like [Cucurbita pepo subsp. pepo]
MSTRG.14233.4	Cp4.1LG01g06110	trans	uncharacterized protein LOC111803518 [Cucurbita pepo subsp. pepo]
MSTRG.14233.4	Cp4.1LG01g22930	trans	translation factor GUF1 homolog, mitochondrial isoform X1 [Cucurbita pepo subsp. pepo]
MSTRG.14233.4	Cp4.1LG04g08540	trans	nucleolar protein 56-like [Cucurbita pepo subsp. pepo]
MSTRG.14233.4	Cp4.1LG02g09950	trans	transmembrane 9 superfamily member 3 [Cucurbita pepo subsp. pepo]
MSTRG.14233.4	Cp4.1LG13g07130	trans	NF-X1-type zinc finger protein NFXL2 [Cucurbita pepo subsp. pepo]
MSTRG.14233.4	Cp4.1LG13g10800	trans	uncharacterized protein At2g39795, mitochondrial [Cucurbita pepo subsp. pepo]
MSTRG.14233.4	Cp4.1LG06g01300	trans	--
MSTRG.14233.4	Cp4.1LG06g03920	trans	phosphoglycerate mutase-like protein 1 isoform X1 [Cucurbita moschata]
MSTRG.14233.4	Cp4.1LG17g07470	trans	nodal modulator 3-like [Cucurbita pepo subsp. pepo]
MSTRG.14233.4	Cp4.1LG08g10850	trans	cell division control protein 48 homolog D-like [Cucurbita pepo subsp. pepo]
MSTRG.14233.4	Cp4.1LG11g11540	trans	leucine-rich repeat extensin-like protein 7 isoform X1 [Cucurbita pepo subsp. pepo]
MSTRG.14233.4	Cp4.1LG16g01110	trans	defensin-like protein 1 [Cucurbita maxima]
MSTRG.14233.4	Cp4.1LG06g09290	cis	uncharacterized aarF domain-containing protein kinase At1g71810, chloroplastic [Cucurbita pepo subsp. pepo]
MSTRG.14233.4	Cp4.1LG09g05290	trans	galactinol synthase 1-like [Cucurbita pepo subsp. pepo]
MSTRG.14233.4	Cp4.1LG11g11100	trans	protein tesmin/TSO1-like CXC 5 isoform X2 [Cucurbita pepo subsp. pepo]
MSTRG.14233.4	Cp4.1LG06g07510	cis	stromal 70 kDa heat shock-related protein, chloroplastic-like [Cucurbita pepo subsp. pepo]
MSTRG.14233.4	Cp4.1LG02g11530	trans	uncharacterized protein LOC111787692 [Cucurbita pepo subsp. pepo]
MSTRG.14233.4	Cp4.1LG03g07960	trans	uncharacterized protein LOC111440860 isoform X1 [Cucurbita moschata]
MSTRG.14233.4	Cp4.1LG11g10270	trans	transmembrane 9 superfamily member 11 [Cucurbita pepo subsp. pepo]
MSTRG.14233.4	Cp4.1LG20g03060	trans	conserved oligomeric Golgi complex subunit 2 [Cucurbita pepo subsp. pepo]
MSTRG.14233.4	Cp4.1LG13g07380	trans	clathrin heavy chain 1-like isoform X1 [Cucurbita pepo subsp. pepo]
MSTRG.14233.4	Cp4.1LG10g06050	trans	glucan endo-1,3-beta-glucosidase 11-like [Cucurbita pepo subsp. pepo]
MSTRG.14233.4	Cp4.1LG11g11260	trans	ethylene-responsive transcription factor ERF039-like [Cucurbita pepo subsp. pepo]
MSTRG.14233.4	Cp4.1LG01g19910	trans	uncharacterized protein LOC111795830 [Cucurbita pepo subsp. pepo]
MSTRG.14233.4	Cp4.1LG05g14470	trans	traB domain-containing protein [Cucurbita pepo subsp. pepo]
MSTRG.14233.4	Cp4.1LG12g04920	trans	splicing factor U2af large subunit A-like isoform X5 [Cucurbita pepo subsp. pepo]
MSTRG.14233.4	Cp4.1LG10g09240	trans	pre-mRNA-splicing factor SYF1 [Cucurbita pepo subsp. pepo]
MSTRG.14233.4	Cp4.1LG06g07490	cis	uncharacterized protein LOC111797455 [Cucurbita pepo subsp. pepo]
MSTRG.14233.4	Cp4.1LG20g08880	trans	protein disulfide isomerase-like 1-4 [Cucurbita pepo subsp. pepo]
MSTRG.14233.4	Cp4.1LG08g13010	trans	phosphoserine aminotransferase 2, chloroplastic [Cucurbita pepo subsp. pepo]
MSTRG.14233.4	Cp4.1LG08g04720	trans	60S ribosome subunit biogenesis protein NIP7 homolog [Cucurbita moschata]
MSTRG.14233.4	Cp4.1LG04g04190	trans	uncharacterized protein LOC111435056 isoform X1 [Cucurbita moschata]
MSTRG.14233.4	Cp4.1LG02g10410	trans	uncharacterized protein LOC111788705 [Cucurbita pepo subsp. pepo]
MSTRG.14233.4	Cp4.1LG11g01620	trans	uncharacterized protein LOC111462847 [Cucurbita moschata]
MSTRG.14233.4	Cp4.1LG10g12260	trans	PHD finger protein At1g33420-like [Cucurbita pepo subsp. pepo]
MSTRG.14233.4	Cp4.1LG18g05460	trans	transmembrane 9 superfamily member 11-like [Cucurbita pepo subsp. pepo]
MSTRG.14233.4	Cp4.1LG04g05670	trans	--
MSTRG.14233.4	Cp4.1LG16g02120	trans	probable carboxylesterase 12 [Cucurbita pepo subsp. pepo]
MSTRG.14233.4	Cp4.1LG05g14500	trans	hypothetical protein FH972_014414 [Carpinus fangiana]
MSTRG.14233.4	Cp4.1LG01g02680	trans	cysteine-rich and transmembrane domain-containing protein WIH2-like [Cucurbita moschata]
MSTRG.14233.4	Cp4.1LG12g10300	trans	uncharacterized protein LOC111807417 [Cucurbita pepo subsp. pepo]
MSTRG.14233.4	Cp4.1LG15g02980	trans	casein kinase II subunit beta-1-like isoform X2 [Cucurbita pepo subsp. pepo]
MSTRG.14233.4	Cp4.1LG05g11980	trans	growth-regulating factor 4-like [Cucurbita pepo subsp. pepo]
MSTRG.14233.4	Cp4.1LG03g13950	trans	nitrate regulatory gene2 protein-like [Cucurbita pepo subsp. pepo]
MSTRG.14233.4	Cp4.1LG16g02660	trans	coatomer [Striga asiatica]
MSTRG.14233.4	Cp4.1LG06g07420	cis	DEAD-box ATP-dependent RNA helicase 39 [Cucurbita pepo subsp. pepo]
MSTRG.14233.4	Cp4.1LG06g08850	trans	uncharacterized protein LOC111796952 [Cucurbita pepo subsp. pepo]
MSTRG.14233.4	Cp4.1LG06g07480	trans	probable alkaline/neutral invertase D [Cucurbita moschata]
MSTRG.14233.4	Cp4.1LG06g07430	cis	protein GIGANTEA-like [Cucurbita pepo subsp. pepo]
MSTRG.14233.4	Cp4.1LG01g04650	trans	spliceosome-associated protein 130 A [Cucurbita moschata]
MSTRG.14233.4	Cp4.1LG12g00840	trans	adenosylhomocysteinase [Cucurbita maxima]
MSTRG.14233.4	Cp4.1LG12g09300	trans	--
MSTRG.14233.4	Cp4.1LG04g00300	trans	mRNA turnover protein 4 homolog [Cucurbita pepo subsp. pepo]
MSTRG.14233.4	Cp4.1LG13g03290	trans	nipped-B-like protein B isoform X3 [Cucurbita pepo subsp. pepo]
[truncated: 14,760 more rows]
