# Supplementary material for: Genome-Wide Identification of Powdery Mildew Responsive Long Non-Coding RNAs in Cucurbita pepo
Source: Front Genet. 2022 Jul 1;13:933022. doi: 10.3389/fgene.2022.933022 (PMC9283782; doi:10.3389/fgene.2022.933022)
Supplement: Supplementary file 9 [file Table12.XLSX]

## Sheet: Sheet1
Table S12 Enriched GO terms in PR
Type	ID	Description	Gene Ratio	Bg Ratio	Enrich_factor	P value
Biological Process	GO:0006418	tRNA aminoacylation for protein translation	0.0016	0.0004	3.81	0.00124516
Biological Process	GO:0009658	chloroplast organization	0.0093	0.0057	1.63	0.00186064
Biological Process	GO:0030244	cellulose biosynthetic process	0.0059	0.0032	1.86	0.00214883
Biological Process	GO:0071555	cell wall organization	0.0199	0.0147	1.35	0.00348873
Biological Process	GO:0045787	positive regulation of cell cycle	0.0022	0.0008	2.67	0.00472228
Biological Process	GO:0007052	mitotic spindle organization	0.0012	0.0003	3.81	0.00474656
Biological Process	GO:0009611	response to wounding	0.0103	0.007	1.46	0.00903816
Biological Process	GO:0031408	oxylipin biosynthetic process	0.0028	0.0013	2.14	0.010462
Biological Process	GO:0007017	microtubule-based process	0.0087	0.0059	1.48	0.0126314
Biological Process	GO:0030433	ubiquitin-dependent ERAD pathway	0.0047	0.0027	1.73	0.0133485
Biological Process	GO:0016049	cell growth	0.0068	0.0044	1.55	0.0141744
Biological Process	GO:0045934	negative regulation of nucleobase-containing compound metabolic process	0.0062	0.0039	1.59	0.0143837
Biological Process	GO:0009657	plastid organization	0.0059	0.0037	1.61	0.0143874
Biological Process	GO:0006399	tRNA metabolic process	0.0016	0.0006	2.72	0.0160029
Biological Process	GO:0006833	water transport	0.0016	0.0006	2.72	0.0160029
Biological Process	GO:0030970	retrograde protein transport, ER to cytosol	0.0016	0.0006	2.72	0.0160029
Biological Process	GO:0042044	fluid transport	0.0016	0.0006	2.72	0.0160029
Biological Process	GO:0045931	positive regulation of mitotic cell cycle	0.0016	0.0006	2.72	0.0160029
Biological Process	GO:0010332	response to gamma radiation	0.0009	0.0002	3.81	0.0180898
Biological Process	GO:0010507	negative regulation of autophagy	0.0009	0.0002	3.81	0.0180898
Biological Process	GO:0036377	arbuscular mycorrhizal association	0.0009	0.0002	3.81	0.0180898
Biological Process	GO:0043572	plastid fission	0.0009	0.0002	3.81	0.0180898
Biological Process	GO:0046496	nicotinamide nucleotide metabolic process	0.0009	0.0002	3.81	0.0180898
Biological Process	GO:1903338	regulation of cell wall organization or biogenesis	0.0009	0.0002	3.81	0.0180898
Biological Process	GO:2001251	negative regulation of chromosome organization	0.0009	0.0002	3.81	0.0180898
Biological Process	GO:0044706	multi-multicellular organism process	0.0047	0.0028	1.68	0.0182017
Biological Process	GO:0060560	developmental growth involved in morphogenesis	0.0062	0.004	1.55	0.0184348
Biological Process	GO:0046785	microtubule polymerization	0.0012	0.0004	3.05	0.0187522
Biological Process	GO:0051228	mitotic spindle disassembly	0.0012	0.0004	3.05	0.0187522
Biological Process	GO:0070475	rRNA base methylation	0.0012	0.0004	3.05	0.0187522
Biological Process	GO:0097352	autophagosome maturation	0.0012	0.0004	3.05	0.0187522
Biological Process	GO:0006725	cellular aromatic compound metabolic process	0.0398	0.0339	1.17	0.0188796
Biological Process	GO:0019438	aromatic compound biosynthetic process	0.009	0.0064	1.42	0.0218602
Biological Process	GO:0006535	cysteine biosynthetic process from serine	0.0025	0.0012	2.03	0.0231501
Biological Process	GO:0051253	negative regulation of RNA metabolic process	0.0059	0.0038	1.54	0.0237238
Biological Process	GO:1902679	negative regulation of RNA biosynthetic process	0.0059	0.0038	1.54	0.0237238
Biological Process	GO:1903507	negative regulation of nucleic acid-templated transcription	0.0059	0.0038	1.54	0.0237238
Biological Process	GO:0009856	pollination	0.0047	0.0029	1.63	0.0242899
Biological Process	GO:0009695	jasmonic acid biosynthetic process	0.0019	0.0008	2.29	0.0250388
Biological Process	GO:0046483	heterocycle metabolic process	0.0392	0.0336	1.16	0.0255504
Biological Process	GO:0009165	nucleotide biosynthetic process	0.0028	0.0015	1.9	0.0263919
Biological Process	GO:0009314	response to radiation	0.0131	0.01	1.31	0.0274863
Biological Process	GO:0040007	growth	0.0084	0.006	1.41	0.0281609
Biological Process	GO:1901360	organic cyclic compound metabolic process	0.0395	0.0341	1.16	0.0304468
Biological Process	GO:0009932	cell tip growth	0.0037	0.0022	1.69	0.0311681
Biological Process	GO:0009299	mRNA transcription	0.0022	0.0011	2.05	0.0314623
Biological Process	GO:0097435	supramolecular fiber organization	0.0022	0.0011	2.05	0.0314623
Biological Process	GO:0000027	ribosomal large subunit assembly	0.0044	0.0027	1.62	0.0318628
Biological Process	GO:0006556	S-adenosylmethionine biosynthetic process	0.0016	0.0007	2.38	0.0334994
Biological Process	GO:0045899	positive regulation of RNA polymerase II transcriptional preinitiation complex assembly	0.0016	0.0007	2.38	0.0334994
Biological Process	GO:0046283	anthocyanin-containing compound metabolic process	0.0016	0.0007	2.38	0.0334994
Biological Process	GO:0090305	nucleic acid phosphodiester bond hydrolysis	0.0261	0.0219	1.19	0.0343528
Biological Process	GO:0009231	riboflavin biosynthetic process	0.0025	0.0013	1.9	0.0358382
Biological Process	GO:0034641	cellular nitrogen compound metabolic process	0.0392	0.034	1.15	0.0363119
Biological Process	GO:0090304	nucleic acid metabolic process	0.0348	0.03	1.16	0.038261
Biological Process	GO:0009690	cytokinin metabolic process	0.0028	0.0016	1.8	0.0387088
Biological Process	GO:0090558	plant epidermis development	0.0047	0.003	1.54	0.0408184
Biological Process	GO:0006541	glutamine metabolic process	0.0037	0.0023	1.63	0.0418437
Biological Process	GO:0010558	negative regulation of macromolecule biosynthetic process	0.0065	0.0046	1.43	0.0423467
Biological Process	GO:0006470	protein dephosphorylation	0.0019	0.0009	2.08	0.043024
Biological Process	GO:0009292	genetic transfer	0.0019	0.0009	2.08	0.043024
Biological Process	GO:0009294	DNA mediated transformation	0.0019	0.0009	2.08	0.043024
Biological Process	GO:0010218	response to far red light	0.0019	0.0009	2.08	0.043024
Biological Process	GO:0044764	multi-organism cellular process	0.0019	0.0009	2.08	0.043024
Biological Process	GO:0045732	positive regulation of protein catabolic process	0.0019	0.0009	2.08	0.043024
Biological Process	GO:0006432	phenylalanyl-tRNA aminoacylation	0.0012	0.0005	2.54	0.0445802
Biological Process	GO:0006513	protein monoubiquitination	0.0012	0.0005	2.54	0.0445802
Biological Process	GO:0006865	amino acid transport	0.0012	0.0005	2.54	0.0445802
Biological Process	GO:0010115	regulation of abscisic acid biosynthetic process	0.0012	0.0005	2.54	0.0445802
Biological Process	GO:0010143	cutin biosynthetic process	0.0012	0.0005	2.54	0.0445802
Biological Process	GO:0010345	suberin biosynthetic process	0.0012	0.0005	2.54	0.0445802
Biological Process	GO:0046514	ceramide catabolic process	0.0012	0.0005	2.54	0.0445802
Biological Process	GO:0048589	developmental growth	0.0075	0.0054	1.38	0.0450204
Biological Process	GO:0016070	RNA metabolic process	0.032	0.0277	1.16	0.0471959
Biological Process	GO:0032989	cellular component morphogenesis	0.0081	0.006	1.36	0.0486994
Biological Process	GO:0009416	response to light stimulus	0.0149	0.012	1.24	0.0488901
Cellular Component	GO:0009536	plastid	0.0266	0.0189	1.41	6.08596e-05
Cellular Component	GO:0009507	chloroplast	0.0452	0.037	1.22	0.00118696
Cellular Component	GO:0005759	mitochondrial matrix	0.005	0.0027	1.88	0.0018337
Cellular Component	GO:0005737	cytoplasm	0.1439	0.1304	1.1	0.00249417
Cellular Component	GO:0009570	chloroplast stroma	0.0132	0.0092	1.43	0.00279086
Cellular Component	GO:0034098	VCP-NPL4-UFD1 AAA ATPase complex	0.0013	0.0004	3.21	0.00549821
Cellular Component	GO:0009532	plastid stroma	0.0063	0.004	1.57	0.00930342
Cellular Component	GO:0005815	microtubule organizing center	0.0018	0.0008	2.45	0.00933332
Cellular Component	GO:0044435	plastid part	0.0105	0.0076	1.38	0.0136556
Cellular Component	GO:0009531	secondary cell wall	0.0008	0.0002	3.86	0.0174119
Cellular Component	GO:0005838	proteasome regulatory particle	0.0011	0.0003	3.09	0.0178818
Cellular Component	GO:0044434	chloroplast part	0.01	0.0075	1.33	0.0273788
Cellular Component	GO:0016021	integral component of membrane	0.4137	0.4008	1.03	0.0306852
Cellular Component	GO:0005742	mitochondrial outer membrane translocase complex	0.0013	0.0005	2.41	0.0317636
Cellular Component	GO:0046695	SLIK (SAGA-like) complex	0.0011	0.0004	2.57	0.042649
Cellular Component	GO:0009524	phragmoplast	0.0018	0.001	1.93	0.045925
Cellular Component	GO:0005669	transcription factor TFIID complex	0.0021	0.0012	1.82	0.0489945
Cellular Component	GO:0009534	chloroplast thylakoid	0.005	0.0035	1.44	0.0492413
Molecular Function	GO:0016760	cellulose synthase (UDP-forming) activity	0.0035	0.0017	2.1	0.000556893
Molecular Function	GO:0005227	calcium activated cation channel activity	0.0015	0.0004	3.25	0.000627361
Molecular Function	GO:0005200	structural constituent of cytoskeleton	0.0033	0.0017	1.92	0.00299474
Molecular Function	GO:0008184	glycogen phosphorylase activity	0.0008	0.0002	3.71	0.00525991
Molecular Function	GO:0009001	serine O-acetyltransferase activity	0.0008	0.0002	3.71	0.00525991
Molecular Function	GO:0017112	Rab guanyl-nucleotide exchange factor activity	0.0008	0.0002	3.71	0.00525991
Molecular Function	GO:0102499	SHG alpha-glucan phosphorylase activity	0.0008	0.0002	3.71	0.00525991
Molecular Function	GO:0036402	proteasome-activating ATPase activity	0.001	0.0003	3.09	0.00659025
Molecular Function	GO:0016788	hydrolase activity, acting on ester bonds	0.0252	0.0211	1.19	0.0141602
Molecular Function	GO:0005344	oxygen transporter activity	0.0006	0.0002	3.71	0.0195359
Molecular Function	GO:0004252	serine-type endopeptidase activity	0.0098	0.0074	1.31	0.0200989
Molecular Function	GO:0016730	oxidoreductase activity, acting on iron-sulfur proteins as donors	0.0008	0.0003	2.97	0.0206356
Molecular Function	GO:0004519	endonuclease activity	0.0187	0.0155	1.21	0.0225591
Molecular Function	GO:0016627	oxidoreductase activity, acting on the CH-CH group of donors	0.0021	0.0011	1.86	0.0233454
Molecular Function	GO:0004518	nuclease activity	0.0179	0.0148	1.2	0.0260145
Molecular Function	GO:0004743	pyruvate kinase activity	0.0017	0.0008	1.98	0.0269518
Molecular Function	GO:0030955	potassium ion binding	0.0017	0.0008	1.98	0.0269518
Molecular Function	GO:0004575	sucrose alpha-glucosidase activity	0.0012	0.0006	2.23	0.0283618
Molecular Function	GO:0050664	oxidoreductase activity, acting on NAD(P)H, oxygen as acceptor	0.0012	0.0006	2.23	0.0283618
Molecular Function	GO:0016765	transferase activity, transferring alkyl or aryl (other than methyl) groups	0.0021	0.0012	1.77	0.0340248
Molecular Function	GO:0030515	snoRNA binding	0.0015	0.0007	2	0.0360035
Molecular Function	GO:0031593	polyubiquitin modification-dependent protein binding	0.0023	0.0013	1.7	0.0361799
Molecular Function	GO:0003955	NAD(P)H dehydrogenase (quinone) activity	0.001	0.0004	2.32	0.0372794
Molecular Function	GO:0004478	methionine adenosyltransferase activity	0.001	0.0004	2.32	0.0372794
Molecular Function	GO:0016844	strictosidine synthase activity	0.001	0.0004	2.32	0.0372794
Molecular Function	GO:0033926	glycopeptide alpha-N-acetylgalactosaminidase activity	0.001	0.0004	2.32	0.0372794
Molecular Function	GO:0005509	calcium ion binding	0.0204	0.0174	1.17	0.0399211
Molecular Function	GO:0015267	channel activity	0.004	0.0027	1.44	0.0472553
Molecular Function	GO:0004129	cytochrome-c oxidase activity	0.0008	0.0003	2.47	0.0487264
Molecular Function	GO:0004812	aminoacyl-tRNA ligase activity	0.0008	0.0003	2.47	0.0487264
Molecular Function	GO:0004826	phenylalanine-tRNA ligase activity	0.0008	0.0003	2.47	0.0487264
Molecular Function	GO:0005452	inorganic anion exchanger activity	0.0008	0.0003	2.47	0.0487264
Molecular Function	GO:0017040	ceramidase activity	0.0008	0.0003	2.47	0.0487264
Molecular Function	GO:0043047	single-stranded telomeric DNA binding	0.0008	0.0003	2.47	0.0487264
Molecular Function	GO:0046577	long-chain-alcohol oxidase activity	0.0008	0.0003	2.47	0.0487264
