# Supplementary material for: Genome-Wide Identification of Powdery Mildew Responsive Long Non-Coding RNAs in Cucurbita pepo
Source: Front Genet. 2022 Jul 1;13:933022. doi: 10.3389/fgene.2022.933022 (PMC9283782; doi:10.3389/fgene.2022.933022)
Supplement: Supplementary file 11 [file Table13.XLSX]

## Sheet: Sheet1
Table S13 Candidate regulation network involved in PM response
LncRNA_ID	Target_gene_ID	Target type	Pathway
MSTRG.16965.1	Cp4.1LG07g04020	trans	MAPK signaling
MSTRG.16965.1	Cp4.1LG09g06080	trans	MAPK signaling
MSTRG.16965.1	Cp4.1LG17g00310	trans	MAPK signaling
MSTRG.16965.1	Cp4.1LG01g21170	trans	MAPK signaling
MSTRG.17932.18	Cp4.1LG09g07120	cis	MAPK signaling
MSTRG.17932.18	Cp4.1LG09g07110	cis	MAPK signaling
MSTRG.17932.18	Cp4.1LG09g07100	cis	MAPK signaling
MSTRG.20701.8	Cp4.1LG04g10980	trans	MAPK signaling
MSTRG.20701.8	Cp4.1LG20g04380	trans	MAPK signaling
MSTRG.2074.1	Cp4.1LG14g09600	trans	MAPK signaling
MSTRG.22219.11	Cp4.1LG02g02190	trans	MAPK signaling
MSTRG.22219.11	Cp4.1LG15g07860	trans	MAPK signaling
MSTRG.22219.11	Cp4.1LG01g21170	trans	MAPK signaling
MSTRG.22219.11	Cp4.1LG09g06080	trans	MAPK signaling
MSTRG.22219.11	Cp4.1LG16g00550	trans	MAPK signaling
MSTRG.22219.11	Cp4.1LG17g00310	trans	MAPK signaling
MSTRG.22219.11	Cp4.1LG05g03210	trans	MAPK signaling
MSTRG.22219.11	Cp4.1LG16g00530	trans	MAPK signaling
MSTRG.23801.1	Cp4.1LG03g14840	trans	MAPK signaling
MSTRG.24598.1	Cp4.1LG02g12910	trans	MAPK signaling
MSTRG.24598.1	Cp4.1LG02g04630	trans	MAPK signaling
MSTRG.24598.1	Cp4.1LG04g01140	trans	MAPK signaling
MSTRG.24598.1	Cp4.1LG14g09600	both	MAPK signaling
MSTRG.24598.1	Cp4.1LG15g05670	trans	MAPK signaling
MSTRG.24598.1	Cp4.1LG14g09560	cis	MAPK signaling
MSTRG.24598.1	Cp4.1LG01g07190	trans	MAPK signaling
MSTRG.3470.9	Cp4.1LG09g06080	trans	MAPK signaling
MSTRG.3470.9	Cp4.1LG07g10740	trans	MAPK signaling
MSTRG.3470.9	Cp4.1LG01g02850	cis	MAPK signaling
MSTRG.3470.9	Cp4.1LG01g21170	trans	MAPK signaling
MSTRG.3470.9	Cp4.1LG02g02190	trans	MAPK signaling
MSTRG.3470.9	Cp4.1LG15g07860	trans	MAPK signaling
MSTRG.3470.9	Cp4.1LG04g10980	trans	MAPK signaling
MSTRG.3973.3	Cp4.1LG04g03030	trans	MAPK signaling
MSTRG.3973.3	Cp4.1LG04g10980	trans	MAPK signaling
MSTRG.3973.3	Cp4.1LG02g02190	trans	MAPK signaling
MSTRG.3973.3	Cp4.1LG15g07860	trans	MAPK signaling
MSTRG.5570.12	Cp4.1LG17g00310	trans	MAPK signaling
MSTRG.5570.12	Cp4.1LG05g03210	trans	MAPK signaling
MSTRG.5570.12	Cp4.1LG01g21170	trans	MAPK signaling
MSTRG.8419.4	Cp4.1LG13g10740	trans	MAPK signaling
MSTRG.16965.1	Cp4.1LG04g09000	trans	plant–pathogen interaction
MSTRG.16965.1	Cp4.1LG16g06670	trans	plant–pathogen interaction
MSTRG.16965.1	Cp4.1LG01g08030	trans	plant–pathogen interaction
MSTRG.16965.1	Cp4.1LG19g09400	trans	plant–pathogen interaction
MSTRG.16965.1	Cp4.1LG05g04950	trans	plant–pathogen interaction
MSTRG.20701.8	Cp4.1LG03g05060	trans	plant–pathogen interaction
MSTRG.20701.8	Cp4.1LG01g01750	trans	plant–pathogen interaction
MSTRG.20701.8	Cp4.1LG16g06670	trans	plant–pathogen interaction
MSTRG.20701.8	Cp4.1LG15g06840	trans	plant–pathogen interaction
MSTRG.2074.1	Cp4.1LG19g08920	trans	plant–pathogen interaction
MSTRG.22219.11	Cp4.1LG19g09400	trans	plant–pathogen interaction
MSTRG.22219.11	Cp4.1LG05g06080	trans	plant–pathogen interaction
MSTRG.22219.11	Cp4.1LG01g08030	trans	plant–pathogen interaction
MSTRG.22219.11	Cp4.1LG16g06670	trans	plant–pathogen interaction
MSTRG.23801.1	Cp4.1LG19g01060	trans	plant–pathogen interaction
MSTRG.23801.1	Cp4.1LG01g01750	trans	plant–pathogen interaction
MSTRG.23801.1	Cp4.1LG14g04840	cis	plant–pathogen interaction
MSTRG.23801.1	Cp4.1LG13g04350	trans	plant–pathogen interaction
MSTRG.24598.1	Cp4.1LG09g05540	trans	plant–pathogen interaction
MSTRG.24598.1	Cp4.1LG08g00890	trans	plant–pathogen interaction
MSTRG.24598.1	Cp4.1LG02g15110	trans	plant–pathogen interaction
MSTRG.24598.1	Cp4.1LG18g07230	trans	plant–pathogen interaction
MSTRG.24598.1	Cp4.1LG04g16040	trans	plant–pathogen interaction
MSTRG.24598.1	Cp4.1LG17g10220	trans	plant–pathogen interaction
MSTRG.24598.1	Cp4.1LG10g00280	trans	plant–pathogen interaction
MSTRG.24598.1	Cp4.1LG03g05830	trans	plant–pathogen interaction
MSTRG.24598.1	Cp4.1LG04g14140	trans	plant–pathogen interaction
MSTRG.28024.2	Cp4.1LG18g00730	cis	plant–pathogen interaction
MSTRG.3470.9	Cp4.1LG16g06670	trans	plant–pathogen interaction
MSTRG.3470.9	Cp4.1LG15g06840	trans	plant–pathogen interaction
MSTRG.3470.9	Cp4.1LG19g09400	trans	plant–pathogen interaction
MSTRG.3973.3	Cp4.1LG01g01750	trans	plant–pathogen interaction
MSTRG.3973.3	Cp4.1LG01g08220	cis	plant–pathogen interaction
MSTRG.3973.3	Cp4.1LG05g14000	trans	plant–pathogen interaction
MSTRG.3973.3	Cp4.1LG02g08420	trans	plant–pathogen interaction
MSTRG.3973.3	Cp4.1LG15g06840	trans	plant–pathogen interaction
MSTRG.3973.3	Cp4.1LG16g06670	trans	plant–pathogen interaction
MSTRG.3973.3	Cp4.1LG01g08030	cis	plant–pathogen interaction
MSTRG.3973.3	Cp4.1LG05g06080	trans	plant–pathogen interaction
MSTRG.3973.3	Cp4.1LG19g09400	trans	plant–pathogen interaction
MSTRG.5570.12	Cp4.1LG01g08030	trans	plant–pathogen interaction
MSTRG.8419.4	Cp4.1LG03g07170	cis	plant–pathogen interaction
MSTRG.14966.4	Cp4.1LG07g04890	cis	plant hormone signal transduction
MSTRG.16965.1	Cp4.1LG01g00620	trans	plant hormone signal transduction
MSTRG.16965.1	Cp4.1LG08g12060	cis	plant hormone signal transduction
MSTRG.16965.1	Cp4.1LG03g08690	trans	plant hormone signal transduction
MSTRG.16965.1	Cp4.1LG01g00080	trans	plant hormone signal transduction
MSTRG.16965.1	Cp4.1LG06g07700	trans	plant hormone signal transduction
MSTRG.16965.1	Cp4.1LG11g01850	trans	plant hormone signal transduction
MSTRG.19620.4	Cp4.1LG10g12160	cis	plant hormone signal transduction
MSTRG.19620.4	Cp4.1LG10g12110	cis	plant hormone signal transduction
MSTRG.20701.8	Cp4.1LG16g02450	trans	plant hormone signal transduction
MSTRG.20701.8	Cp4.1LG20g05550	trans	plant hormone signal transduction
MSTRG.20701.8	Cp4.1LG01g19620	trans	plant hormone signal transduction
MSTRG.2074.1	Cp4.1LG12g10510	trans	plant hormone signal transduction
MSTRG.2074.1	Cp4.1LG00g14060	cis	plant hormone signal transduction
MSTRG.2074.1	Cp4.1LG18g06180	trans	plant hormone signal transduction
MSTRG.22219.11	Cp4.1LG12g10510	cis	plant hormone signal transduction
MSTRG.22219.11	Cp4.1LG16g06120	trans	plant hormone signal transduction
MSTRG.22219.11	Cp4.1LG06g07700	trans	plant hormone signal transduction
MSTRG.22219.11	Cp4.1LG01g00080	trans	plant hormone signal transduction
MSTRG.22219.11	Cp4.1LG03g08690	trans	plant hormone signal transduction
MSTRG.22219.11	Cp4.1LG17g06010	trans	plant hormone signal transduction
MSTRG.23801.1	Cp4.1LG01g18980	trans	plant hormone signal transduction
MSTRG.23801.1	Cp4.1LG17g04050	trans	plant hormone signal transduction
MSTRG.23801.1	Cp4.1LG10g12110	trans	plant hormone signal transduction
MSTRG.23801.1	Cp4.1LG01g19620	trans	plant hormone signal transduction
MSTRG.23801.1	Cp4.1LG19g05880	trans	plant hormone signal transduction
MSTRG.24598.1	Cp4.1LG04g16380	trans	plant hormone signal transduction
MSTRG.24598.1	Cp4.1LG02g16900	trans	plant hormone signal transduction
MSTRG.24598.1	Cp4.1LG14g09530	cis	plant hormone signal transduction
MSTRG.24598.1	Cp4.1LG20g08470	trans	plant hormone signal transduction
MSTRG.3470.9	Cp4.1LG01g00080	trans	plant hormone signal transduction
MSTRG.3470.9	Cp4.1LG11g10230	trans	plant hormone signal transduction
MSTRG.3470.9	Cp4.1LG08g13050	trans	plant hormone signal transduction
MSTRG.3470.9	Cp4.1LG03g08690	trans	plant hormone signal transduction
MSTRG.3973.3	Cp4.1LG01g00620	trans	plant hormone signal transduction
MSTRG.3973.3	Cp4.1LG20g05550	trans	plant hormone signal transduction
MSTRG.3973.3	Cp4.1LG15g01160	trans	plant hormone signal transduction
MSTRG.3973.3	Cp4.1LG01g09550	trans	plant hormone signal transduction
MSTRG.3973.3	Cp4.1LG01g08290	cis	plant hormone signal transduction
MSTRG.3973.3	Cp4.1LG11g10230	trans	plant hormone signal transduction
MSTRG.3973.3	Cp4.1LG16g04770	trans	plant hormone signal transduction
MSTRG.5570.12	Cp4.1LG06g07700	trans	plant hormone signal transduction
MSTRG.5570.12	Cp4.1LG01g00080	trans	plant hormone signal transduction
MSTRG.5570.12	Cp4.1LG08g13050	trans	plant hormone signal transduction
MSTRG.5570.12	Cp4.1LG03g08690	trans	plant hormone signal transduction
MSTRG.643.6	Cp4.1LG00g04820	cis	plant hormone signal transduction
MSTRG.8419.4	Cp4.1LG17g06010	trans	plant hormone signal transduction
MSTRG.8419.4	Cp4.1LG03g07040	cis	plant hormone signal transduction
