# Supplementary material for: Genome-Wide Identification of Powdery Mildew Responsive Long Non-Coding RNAs in Cucurbita pepo
Source: Front Genet. 2022 Jul 1;13:933022. doi: 10.3389/fgene.2022.933022 (PMC9283782; doi:10.3389/fgene.2022.933022)
Supplement: Supplementary file 12 [file Table7.XLSX]

## Sheet: Sheet1
Table S7 lncRNAs corresponding to miRNA precursors
miRNA ID	lncRNA ID	DEL	E-value	Mature sequence of miRNA
cpe-miR162	MSTRG.11287.1	YES	1e-34	UCGAUAAACCUCUGCAUCCAG
cpe-miR166	MSTRG.12356.1	YES	6e-09	UCGGACCAGGCUUCAUUCCCC
cpe-miR319	MSTRG.22439.2	YES	1e-67	UUGGACUGAAGGGAGCUCCC
cpe-miR396a	MSTRG.11047.1	YES	1e-105	UUCCACAGCUUUCUUGAACU
cpe-miR396a	MSTRG.11047.3	YES	1e-104	UUCCACAGCUUUCUUGAACU
cpe-miR172	MSTRG.23109.2	YES	2e-14	AGAAUCUUGAUGAUGCUGCAU
cpe-miR156b	MSTRG.5821.1	NO	4e-20	UGACAGAAGAUAGAGAGCAC
cpe-miR156e	MSTRG.13553.1	NO	6e-33	GUUGACAGAAGAGAGUGAGCAC
cpe-miR156e	MSTRG.13553.2	NO	6e-33	GUUGACAGAAGAGAGUGAGCAC
cpe-miR156e	MSTRG.13553.3	NO	5e-33	GUUGACAGAAGAGAGUGAGCAC
cpe-miR156e	MSTRG.13553.4	NO	7e-33	GUUGACAGAAGAGAGUGAGCAC
cpe-miR156e	MSTRG.13553.5	NO	6e-33	GUUGACAGAAGAGAGUGAGCAC
cpe-miR156e	MSTRG.13553.7	NO	7e-33	GUUGACAGAAGAGAGUGAGCAC
cpe-miR156e	MSTRG.13553.9	NO	5e-33	GUUGACAGAAGAGAGUGAGCAC
cpe-miR160	MSTRG.5481.1	NO	8e-17	UGCCUGGCUCCCUGUAUGCCA
cpe-miR160	MSTRG.5481.2	NO	8e-17	UGCCUGGCUCCCUGUAUGCCA
cpe-miR160	MSTRG.5481.3	NO	1e-16	UGCCUGGCUCCCUGUAUGCCA
cpe-miR160	MSTRG.5481.4	NO	1e-16	UGCCUGGCUCCCUGUAUGCCA
cpe-miR162	MSTRG.11287.2	NO	1e-34	UCGAUAAACCUCUGCAUCCAG
cpe-miR162	MSTRG.11287.3	NO	1e-34	UCGAUAAACCUCUGCAUCCAG
cpe-miR162	MSTRG.28729.1	NO	2e-41	UCGAUAAACCUCUGCAUCCAG
cpe-miR162	MSTRG.28729.2	NO	2e-41	UCGAUAAACCUCUGCAUCCAG
cpe-miR166	MSTRG.12356.2	NO	6e-09	UCGGACCAGGCUUCAUUCCCC
cpe-miR166	MSTRG.9716.2	NO	2e-09	UCGGACCAGGCUUCAUUCCCC
cpe-miR166	MSTRG.9716.3	NO	2e-08	UCGGACCAGGCUUCAUUCCCC
cpe-miR319	MSTRG.22439.1	NO	1e-67	UUGGACUGAAGGGAGCUCCC
cpe-miR319	MSTRG.22439.3	NO	1e-67	UUGGACUGAAGGGAGCUCCC
cpe-miR319	MSTRG.22439.4	NO	6e-68	UUGGACUGAAGGGAGCUCCC
cpe-miR319	MSTRG.11909.2	NO	5e-62	UUGGACUGAAGGGAGCUCCC
cpe-miR319	MSTRG.11909.3	NO	5e-62	UUGGACUGAAGGGAGCUCCC
cpe-miR156a	MSTRG.13553.1	NO	1e-15	UGACAGAAGAGAGUGAGCAC
cpe-miR156a	MSTRG.13553.2	NO	1e-15	UGACAGAAGAGAGUGAGCAC
cpe-miR156a	MSTRG.13553.3	NO	9e-16	UGACAGAAGAGAGUGAGCAC
cpe-miR156a	MSTRG.13553.4	NO	1e-15	UGACAGAAGAGAGUGAGCAC
cpe-miR156a	MSTRG.13553.5	NO	1e-15	UGACAGAAGAGAGUGAGCAC
cpe-miR156a	MSTRG.13553.7	NO	1e-15	UGACAGAAGAGAGUGAGCAC
cpe-miR156a	MSTRG.13553.9	NO	8e-16	UGACAGAAGAGAGUGAGCAC
cpe-miR396a	MSTRG.28493.1	NO	2e-21	UUCCACAGCUUUCUUGAACU
cpe-miR396a	MSTRG.28493.2	NO	2e-21	UUCCACAGCUUUCUUGAACU
cpe-miR172	MSTRG.23148.1	NO	1e-13	AGAAUCUUGAUGAUGCUGCAU
cpe-miR396b	MSTRG.11046.1	NO	4e-93	UUCCACAGCUUUCUUGAACUU
