# Supplementary material for: Genome-Wide Identification of Powdery Mildew Responsive Long Non-Coding RNAs in Cucurbita pepo
Source: Front Genet. 2022 Jul 1;13:933022. doi: 10.3389/fgene.2022.933022 (PMC9283782; doi:10.3389/fgene.2022.933022)
Supplement: Supplementary file 13 [file Table8.XLSX]

## Sheet: Sheet1
Table S8 The lncRNAs predicted as targets of miRNAs
miRNA_Acc.	Target_Acc.	DEL	Expectation	miRNA_aligned_fragment	Target_aligned_fragment	Inhibition
cpe-miR5067	MSTRG.14966.4	YES	0.5	UAAAUUAGCCGACGUGGGACUUUC	GGAAGUCCCAUGUCGGCUAAUUUA	Cleavage
cpe-miR396a	MSTRG.15616.2	YES	1.5	UUCCACAGCUUUCUUGAACU	AGUUGAAGAAAGCUGUGGGA	Cleavage
cpe-miR172	MSTRG.23109.2	YES	1.5	AGAAUCUUGAUGAUGCUGCAU	GUGCGGCAUCAUCAAGAUUCA	Cleavage
cpe-miR396b	MSTRG.15616.2	YES	1.5	UUCCACAGCUUUCUUGAACUU	AAGUUGAAGAAAGCUGUGGGA	Cleavage
cpe-miR396a	MSTRG.11047.1	YES	2	UUCCACAGCUUUCUUGAACU	GGUUCAAUAAAGCUGUGGGA	Cleavage
cpe-miR396a	MSTRG.11047.3	YES	2	UUCCACAGCUUUCUUGAACU	GGUUCAAUAAAGCUGUGGGA	Cleavage
cpe-miR396b	MSTRG.11047.1	YES	2	UUCCACAGCUUUCUUGAACUU	CGGUUCAAUAAAGCUGUGGGA	Cleavage
cpe-miR396b	MSTRG.11047.3	YES	2	UUCCACAGCUUUCUUGAACUU	CGGUUCAAUAAAGCUGUGGGA	Cleavage
cpe-miR156c	MSTRG.17429.3	YES	3	UGACAGAAGAGAGGGAGCAC	UUGCUAUCUCUCUUUUGUCU	Cleavage
cpe-miR159	MSTRG.22439.2	YES	3	AUUGGAUUGAAGGGAGCUCCU	GAGAGCUUUCUUCAGUCCACU	Cleavage
cpe-miR319	MSTRG.22439.2	YES	3	UUGGACUGAAGGGAGCUCCC	GAGAGCUUUCUUCAGUCCAC	Cleavage
cpe-miR396a	MSTRG.5438.8	YES	3	UUCCACAGCUUUCUUGAACU	UAUUCAAGAAAGUUGUGUAA	Cleavage
cpe-miR172	MSTRG.30999.1	YES	3	AGAAUCUUGAUGAUGCUGCAU	GAGUAGCAUCUUCAAGAUUCA	Translation
cpe-miR396b	MSTRG.5438.8	YES	3	UUCCACAGCUUUCUUGAACUU	GUAUUCAAGAAAGUUGUGUAA	Cleavage
cpe-miR156a	MSTRG.17429.3	YES	3.5	UGACAGAAGAGAGUGAGCAC	UUGCUAUCUCUCUUUUGUCU	Cleavage
cpe-miR172	MSTRG.26803.12	YES	3.5	AGAAUCUUGAUGAUGCUGCAU	UGGCAG-AUGAUCAAGAUUCU	Cleavage
cpe-miR5067	MSTRG.24797.4	YES	3.5	UAAAUUAGCCGACGUGGGACUUUC	GAGAGUCCCACCUGGGUUAAUUUA	Translation
cpe-miR156b	MSTRG.17429.3	YES	4	UGACAGAAGAUAGAGAGCAC	UUGCUAUCUCUCUUUUGUCU	Translation
cpe-miR156c	MSTRG.27883.1	YES	4	UGACAGAAGAGAGGGAGCAC	UUCCUUUUUCUCUUCUGUUU	Cleavage
cpe-miR156e	MSTRG.2101.1	YES	4	GUUGACAGAAGAGAGUGAGCAC	GGCCUCAUUGUCUUCUCUCAAU	Cleavage
cpe-miR156e	MSTRG.12356.1	YES	4	GUUGACAGAAGAGAGUGAGCAC	UCUCUCUCUCUUUUCUCUCAAA	Cleavage
cpe-miR162	MSTRG.11287.1	YES	4	UCGAUAAACCUCUGCAUCCAG	GUGGAAGCAGCGGUUCAUCGA	Translation
cpe-miR171c	MSTRG.1028.4	YES	4	UUGAGCCGUGCCAAUAUCACG	CUACAUAUUGGUAUGGUUUAA	Cleavage
cpe-miR156b	MSTRG.24989.1	YES	4.5	UGACAGAAGAUAGAGAGCAC	UUUCUCUCUAUUUUUUCUCC	Cleavage
cpe-miR156a	MSTRG.27883.1	YES	4.5	UGACAGAAGAGAGUGAGCAC	UUCCUUUUUCUCUUCUGUUU	Cleavage
cpe-miR156c	MSTRG.12356.1	YES	4.5	UGACAGAAGAGAGGGAGCAC	UCUCUCUCUCUUUUCUCUCA	Cleavage
cpe-miR156c	MSTRG.18687.1	YES	4.5	UGACAGAAGAGAGGGAGCAC	CUCCUUUCUCUUUUUUGUUU	Cleavage
cpe-miR156e	MSTRG.17429.3	YES	4.5	GUUGACAGAAGAGAGUGAGCAC	UUGCUAUCUCUCUUUUGUCUAU	Cleavage
cpe-miR159	MSTRG.22259.7	YES	4.5	AUUGGAUUGAAGGGAGCUCCU	UUCAGCUUCUGUUAAUUCAAU	Translation
cpe-miR164	MSTRG.16105.11	YES	4.5	UGGAGAAGCAGGGCACGUGCA	UUUAAGUGCUCUGCAUUUCUA	Cleavage
cpe-miR319	MSTRG.21010.10	YES	4.5	UUGGACUGAAGGGAGCUCCC	UGUAGUUCUCUUUAGUAUAA	Cleavage
cpe-miR319	MSTRG.21010.7	YES	4.5	UUGGACUGAAGGGAGCUCCC	UGUAGUUCUCUUUAGUAUAA	Cleavage
cpe-miR156d	MSTRG.17429.3	YES	4.5	UUGACAGAAGAUAGAGAGCAC	UUGCUAUCUCUCUUUUGUCUA	Cleavage
cpe-miR156d	MSTRG.12356.1	YES	4.5	UUGACAGAAGAUAGAGAGCAC	UCUCUCUCUCUUUUCUCUCAA	Cleavage
cpe-miR156d	MSTRG.686.1	YES	4.5	UUGACAGAAGAUAGAGAGCAC	UCGCUCUCUAUUUUC-GUCGG	Cleavage
cpe-miR156d	MSTRG.2101.1	YES	4.5	UUGACAGAAGAUAGAGAGCAC	GGCCUCAUUGUCUUCUCUCAA	Cleavage
cpe-miR156b	MSTRG.686.1	YES	5	UGACAGAAGAUAGAGAGCAC	UCGCUCUCUAUUUUC-GUCG	Cleavage
cpe-miR156b	MSTRG.27883.1	YES	5	UGACAGAAGAUAGAGAGCAC	UUCCUUUUUCUCUUCUGUUU	Translation
cpe-miR156b	MSTRG.23642.9	YES	5	UGACAGAAGAUAGAGAGCAC	UUACUAUUUAUCGUUUGUUA	Cleavage
cpe-miR156b	MSTRG.19354.2	YES	5	UGACAGAAGAUAGAGAGCAC	UUCCUUCUUAUUUUCUGUUU	Cleavage
cpe-miR156a	MSTRG.3973.3	YES	5	UGACAGAAGAGAGUGAGCAC	GUUUCUGCUUUCUUCUGUCU	Cleavage
cpe-miR156a	MSTRG.12356.1	YES	5	UGACAGAAGAGAGUGAGCAC	UCUCUCUCUCUUUUCUCUCA	Cleavage
cpe-miR156a	MSTRG.23109.2	YES	5	UGACAGAAGAGAGUGAGCAC	UUCCUCACUCUUUGUUGUUU	Cleavage
cpe-miR156a	MSTRG.18687.1	YES	5	UGACAGAAGAGAGUGAGCAC	CUCCUUUCUCUUUUUUGUUU	Cleavage
cpe-miR156c	MSTRG.11047.3	YES	5	UGACAGAAGAGAGGGAGCAC	AAUUUCUCUCUCUUUUGUUC	Cleavage
cpe-miR156c	MSTRG.11047.1	YES	5	UGACAGAAGAGAGGGAGCAC	AAUUUCUCUCUCUUUUGUUC	Cleavage
cpe-miR156c	MSTRG.1770.4	YES	5	UGACAGAAGAGAGGGAGCAC	UUCCUCUCUCUUUUUUUUCC	Cleavage
cpe-miR156c	MSTRG.24797.4	YES	5	UGACAGAAGAGAGG-GAGCAC	AUGCUCAUCCUUCUUCUGUUA	Cleavage
cpe-miR156c	MSTRG.4776.1	YES	5	UGACAGAAGAGAGGGAGCAC	AUCUUUUCUUUCUUUUCUCA	Cleavage
cpe-miR156e	MSTRG.23109.2	YES	5	GUUGACAGAAGAGAGUGAGCAC	UUCCUCACUCUUUGUUGUUUAU	Cleavage
cpe-miR159	MSTRG.11047.1	YES	5	AUUGGAUUGAAGGGAGCUCCU	UGGAUCUACCAUUAAUUUAAU	Translation
cpe-miR164	MSTRG.3470.9	YES	5	UGGAGAAGCAGGGCACGUGCA	AUAACAUGCUCUGUUUUUCUU	Cleavage
cpe-miR164	MSTRG.643.6	YES	5	UGGAGAAGCAGGGCACGUGCA	AUUAUGUCUCUUGCUUUUUCU	Cleavage
cpe-miR171b	MSTRG.14233.4	YES	5	UGAUUGAGCCGUGCCAAUAUC	UCUAUUGACAUGGCUAAGUUU	Cleavage
cpe-miR172	MSTRG.12598.12	YES	5	AGAAUCUUGAUGAUGCUGCAU	UCGCACCAUUAUCGGGAUACA	Cleavage
cpe-miR172	MSTRG.12598.13	YES	5	AGAAUCUUGAUGAUGCUGCAU	UCGCACCAUUAUCGGGAUACA	Cleavage
cpe-miR172	MSTRG.30960.2	YES	5	AGAAUCUUGAUGAUGCUGCAU	GGACAUAAUCAAUAAGAUUCU	Translation
cpe-miR5067	MSTRG.28915.5	YES	5	UAAAUUAGCCGACGUGGGACUUUC	UUACUUGCCGUGUUGACUAAUUUU	Cleavage
cpe-miR5067	MSTRG.24075.3	NO	0	UAAAUUAGCCGACGUGGGACUUUC	GAAAGUCCCACGUCGGCUAAUUUA	Cleavage
cpe-miR5067	MSTRG.10924.3	NO	0.5	UAAAUUAGCCGACGUGGGACUUUC	GGGAGUCCCACGUUGGCUAAUUUA	Cleavage
cpe-miR396a	MSTRG.15616.1	NO	1.5	UUCCACAGCUUUCUUGAACU	AGUUGAAGAAAGCUGUGGGA	Cleavage
cpe-miR396a	MSTRG.11046.1	NO	1.5	UUCCACAGCUUUCUUGAACU	AGCUCAAGAAAGCUGUGGGA	Cleavage
cpe-miR172	MSTRG.23148.1	NO	1.5	AGAAUCUUGAUGAUGCUGCAU	GUGCGGCAUCAUCAAGAUUCA	Cleavage
cpe-miR396b	MSTRG.15616.1	NO	1.5	UUCCACAGCUUUCUUGAACUU	AAGUUGAAGAAAGCUGUGGGA	Cleavage
cpe-miR396b	MSTRG.11046.1	NO	1.5	UUCCACAGCUUUCUUGAACUU	AAGCUCAAGAAAGCUGUGGGA	Cleavage
cpe-miR156b	MSTRG.13887.10	NO	2	UGACAGAAGAUAGAGAGCAC	AUGUUCUUUAUCUUCUGUCU	Cleavage
cpe-miR319	MSTRG.5025.7	NO	2	UUGGACUGAAGGGAGCUCCC	AGGAGCUCUCUUCAGUUCAU	Cleavage
cpe-miR319	MSTRG.5025.6	NO	2	UUGGACUGAAGGGAGCUCCC	AGGAGCUCUCUUCAGUUCAU	Cleavage
cpe-miR319	MSTRG.5025.9	NO	2	UUGGACUGAAGGGAGCUCCC	AGGAGCUCUCUUCAGUUCAU	Cleavage
cpe-miR319	MSTRG.5025.5	NO	2	UUGGACUGAAGGGAGCUCCC	AGGAGCUCUCUUCAGUUCAU	Cleavage
cpe-miR319	MSTRG.5025.4	NO	2	UUGGACUGAAGGGAGCUCCC	AGGAGCUCUCUUCAGUUCAU	Cleavage
cpe-miR319	MSTRG.5025.1	NO	2	UUGGACUGAAGGGAGCUCCC	AGGAGCUCUCUUCAGUUCAU	Cleavage
cpe-miR396a	MSTRG.28493.2	NO	2	UUCCACAGCUUUCUUGAACU	GGUUCAAUAAAGCUGUGGGA	Cleavage
cpe-miR396a	MSTRG.28493.1	NO	2	UUCCACAGCUUUCUUGAACU	GGUUCAAUAAAGCUGUGGGA	Cleavage
cpe-miR396a	MSTRG.22927.4	NO	2	UUCCACAGCUUUCUUGAACU	UGUUAGAGAAAGUUGUGGAA	Cleavage
cpe-miR5067	MSTRG.17797.1	NO	2	UAAAUUAGCCGACGUGGGACUUUC	GGGAGUCCCACAUUGGCUAAUUUA	Cleavage
cpe-miR5067	MSTRG.17797.2	NO	2	UAAAUUAGCCGACGUGGGACUUUC	GGGAGUCCCACAUUGGCUAAUUUA	Cleavage
cpe-miR5067	MSTRG.17854.1	NO	2	UAAAUUAGCCGACGUGGGACUUUC	AAGAGUCUCACGUGGGCUAAUUUA	Translation
cpe-miR396b	MSTRG.28493.2	NO	2	UUCCACAGCUUUCUUGAACUU	CGGUUCAAUAAAGCUGUGGGA	Cleavage
cpe-miR396b	MSTRG.28493.1	NO	2	UUCCACAGCUUUCUUGAACUU	CGGUUCAAUAAAGCUGUGGGA	Cleavage
cpe-miR396b	MSTRG.22927.4	NO	2	UUCCACAGCUUUCUUGAACUU	CUGUUAGAGAAAGUUGUGGAA	Cleavage
cpe-miR156b	MSTRG.26336.1	NO	2.5	UGACAGAAGAUAGAGAGCAC	GUGCUCUUUAUCAUCUGUUA	Cleavage
cpe-miR156e	MSTRG.1633.1	NO	2.5	GUUGACAGAAGAGAGUGAGCAC	UAACUGACUUUCUUCUGUCAAG	Cleavage
cpe-miR5067	MSTRG.22352.3	NO	2.5	UAAAUUAGCCGACGUGGGACUUUC	GAAAGUCUCACCUUGGCUAAUUUA	Cleavage
cpe-miR5067	MSTRG.15926.9	NO	2.5	UAAAUUAGCCGACGUGGGACUUUC	GGGAGUCUCACAUUGGCUAAUUUA	Cleavage
cpe-miR156b	MSTRG.5821.1	NO	3	UGACAGAAG-AUAGAGAGCAC	GUGCUCUCUAUGCUUCUGUCA	Cleavage
cpe-miR159	MSTRG.5025.1	NO	3	AUUGGAUUGAAGGGAGCUCCU	AGGAGCUCUCUUCAGUUCAUU	Cleavage
cpe-miR159	MSTRG.5025.4	NO	3	AUUGGAUUGAAGGGAGCUCCU	AGGAGCUCUCUUCAGUUCAUU	Cleavage
cpe-miR159	MSTRG.5025.5	NO	3	AUUGGAUUGAAGGGAGCUCCU	AGGAGCUCUCUUCAGUUCAUU	Cleavage
cpe-miR159	MSTRG.5025.9	NO	3	AUUGGAUUGAAGGGAGCUCCU	AGGAGCUCUCUUCAGUUCAUU	Cleavage
cpe-miR159	MSTRG.5025.6	NO	3	AUUGGAUUGAAGGGAGCUCCU	AGGAGCUCUCUUCAGUUCAUU	Cleavage
cpe-miR159	MSTRG.5025.7	NO	3	AUUGGAUUGAAGGGAGCUCCU	AGGAGCUCUCUUCAGUUCAUU	Cleavage
cpe-miR159	MSTRG.11909.2	NO	3	AUUGGAUUGAAGGGAGCUCCU	GAGAGCUUUCUUCAGUCCACU	Cleavage
cpe-miR159	MSTRG.11909.3	NO	3	AUUGGAUUGAAGGGAGCUCCU	GAGAGCUUUCUUCAGUCCACU	Cleavage
cpe-miR159	MSTRG.22439.1	NO	3	AUUGGAUUGAAGGGAGCUCCU	GAGAGCUUUCUUCAGUCCACU	Cleavage
cpe-miR159	MSTRG.22439.3	NO	3	AUUGGAUUGAAGGGAGCUCCU	GAGAGCUUUCUUCAGUCCACU	Cleavage
cpe-miR159	MSTRG.22439.4	NO	3	AUUGGAUUGAAGGGAGCUCCU	GAGAGCUUUCUUCAGUCCACU	Cleavage
cpe-miR319	MSTRG.22439.4	NO	3	UUGGACUGAAGGGAGCUCCC	GAGAGCUUUCUUCAGUCCAC	Cleavage
cpe-miR319	MSTRG.22439.3	NO	3	UUGGACUGAAGGGAGCUCCC	GAGAGCUUUCUUCAGUCCAC	Cleavage
cpe-miR319	MSTRG.22439.1	NO	3	UUGGACUGAAGGGAGCUCCC	GAGAGCUUUCUUCAGUCCAC	Cleavage
cpe-miR319	MSTRG.11909.3	NO	3	UUGGACUGAAGGGAGCUCCC	GAGAGCUUUCUUCAGUCCAC	Cleavage
cpe-miR319	MSTRG.11909.2	NO	3	UUGGACUGAAGGGAGCUCCC	GAGAGCUUUCUUCAGUCCAC	Cleavage
cpe-miR172	MSTRG.30999.2	NO	3	AGAAUCUUGAUGAUGCUGCAU	GAGUAGCAUCUUCAAGAUUCA	Translation
cpe-miR5067	MSTRG.2307.1	NO	3	UAAAUUAGCCGACGUGGGACUUUC	GAAAGUCCCACAUCGGCUAAUUCA	Cleavage
cpe-miR5067	MSTRG.14353.1	NO	3	UAAAUUAGCCGACGUGGGACUUUC	GAGAGUUCUACAUUGGCUAAUUUA	Cleavage
cpe-miR5067	MSTRG.10581.1	NO	3	UAAAUUAGCCGACGUGGGACUUUC	GGAAGUCCCACAUCGACUAAUUUA	Cleavage
cpe-miR156a	MSTRG.1633.1	NO	3.5	UGACAGAAGAGAGUGAGCAC	UAACUGACUUUCUUCUGUCA	Cleavage
cpe-miR156a	MSTRG.30956.1	NO	3.5	UGACAGAAGAGAGUGAGCAC	AUGCGGGCUCUUUUCUGUUA	Cleavage
cpe-miR156c	MSTRG.25313.3	NO	3.5	UGACAGAAGAGAGGGAGCAC	UUGCUUCCCCUCUUCUUUCA	Cleavage
cpe-miR156e	MSTRG.11003.1	NO	3.5	GUUGACAGAAGAGAGUGAGCAC	UUUUUCUUUUUUUUCUGUUAAC	Cleavage
cpe-miR171b	MSTRG.2852.1	NO	3.5	UGAUUGAGCCGUGCCAAUAUC	UUUAUUGACAUGGCUAAGUCA	Cleavage
cpe-miR171c	MSTRG.4026.18	NO	3.5	UUGAGCCGUGCCAAUAUCACG	CAUGAGAUUGGCAUGGUUAAA	Cleavage
cpe-miR156d	MSTRG.26336.1	NO	3.5	UUGACAGAAGAUAGAGAGCAC	GUGCUCUUUAUCAUCUGUUAC	Cleavage
cpe-miR156d	MSTRG.13887.10	NO	3.5	UUGACAGAAGAUAGAGAGCAC	AUGUUCUUUAUCUUCUGUCUG	Cleavage
cpe-miR156d	MSTRG.17126.2	NO	3.5	UUGACAGAAGAUAGAGAGCAC	UAUUUCUUUAUUUUUUGUCAG	Cleavage
cpe-miR172	MSTRG.15116.12	NO	3.5	AGAAUCUUGAUGAUGCUGCAU	ACCAAGCAUCAUCAACAUUCU	Cleavage
cpe-miR172	MSTRG.15116.10	NO	3.5	AGAAUCUUGAUGAUGCUGCAU	ACCAAGCAUCAUCAACAUUCU	Cleavage
cpe-miR172	MSTRG.15116.11	NO	3.5	AGAAUCUUGAUGAUGCUGCAU	ACCAAGCAUCAUCAACAUUCU	Cleavage
cpe-miR172	MSTRG.15116.14	NO	3.5	AGAAUCUUGAUGAUGCUGCAU	ACCAAGCAUCAUCAACAUUCU	Cleavage
cpe-miR172	MSTRG.15116.13	NO	3.5	AGAAUCUUGAUGAUGCUGCAU	ACCAAGCAUCAUCAACAUUCU	Cleavage
cpe-miR172	MSTRG.396.1	NO	3.5	AGAAUCUUGAUGAUGCUGCAU	UCCCAUUAUCAUCGAGGUUCU	Cleavage
cpe-miR172	MSTRG.26803.13	NO	3.5	AGAAUCUUGAUGAUGCUGCAU	UGGCAG-AUGAUCAAGAUUCU	Cleavage
cpe-miR172	MSTRG.26803.6	NO	3.5	AGAAUCUUGAUGAUGCUGCAU	UGGCAG-AUGAUCAAGAUUCU	Cleavage
cpe-miR172	MSTRG.26803.16	NO	3.5	AGAAUCUUGAUGAUGCUGCAU	UGGCAG-AUGAUCAAGAUUCU	Cleavage
cpe-miR172	MSTRG.26803.11	NO	3.5	AGAAUCUUGAUGAUGCUGCAU	UGGCAG-AUGAUCAAGAUUCU	Cleavage
cpe-miR172	MSTRG.26803.7	NO	3.5	AGAAUCUUGAUGAUGCUGCAU	UGGCAG-AUGAUCAAGAUUCU	Cleavage
cpe-miR172	MSTRG.26803.14	NO	3.5	AGAAUCUUGAUGAUGCUGCAU	UGGCAG-AUGAUCAAGAUUCU	Cleavage
cpe-miR172	MSTRG.26803.17	NO	3.5	AGAAUCUUGAUGAUGCUGCAU	UGGCAG-AUGAUCAAGAUUCU	Cleavage
cpe-miR5067	MSTRG.28493.2	NO	3.5	UAAAUUAGCCGACGUGGGACUUUC	CAAAGUCUCACAUCAGCUAAUUUA	Translation
cpe-miR5067	MSTRG.28493.1	NO	3.5	UAAAUUAGCCGACGUGGGACUUUC	CAAAGUCUCACAUCAGCUAAUUUA	Translation
cpe-miR5067	MSTRG.28700.4	NO	3.5	UAAAUUAGCCGACGUGGGACUUUC	AGGAGUCCCACAUCGGUUAAUUAA	Cleavage
cpe-miR5067	MSTRG.10779.6	NO	3.5	UAAAUUAGCCGACGUGGGACUUUC	AGGAGUCCCACUUUGGCUAAUUAA	Cleavage
cpe-miR156b	MSTRG.17126.2	NO	4	UGACAGAAGAUAGAGAGCAC	UAUUUCUUUAUUUUUUGUCA	Cleavage
cpe-miR156b	MSTRG.603.1	NO	4	UGACAGAAGAUAGAGAGCAC	CUGCUCUUUAUUCUCUGUUU	Cleavage
cpe-miR156b	MSTRG.9202.1	NO	4	UGACAGAAGAUAGAGAGCAC	UUGUUUGCUGUCUUUUGUUG	Cleavage
cpe-miR156b	MSTRG.30846.6	NO	4	UGACAGAAGAUAGAGAGCAC	UUGUUC-CUAUUUUUUGUUA	Cleavage
cpe-miR156a	MSTRG.11907.9	NO	4	UGACAGAAGAGAGUGAGCAC	AUGUUUACUUUCUUCUGUAG	Cleavage
cpe-miR156a	MSTRG.13787.1	NO	4	UGACAGAAGAGAGUGAGCAC	GUAUUCAAUCUCUUCUGUUG	Cleavage
cpe-miR156a	MSTRG.833.1	NO	4	UGACAGAAGAGAGUGAGCAC	GUAUUCAAUCUCUUCUGUUG	Cleavage
cpe-miR156a	MSTRG.11972.10	NO	4	UGACAGAAGAGAGUGAGCAC	UUGUGUAUUUUUUUCUGUCG	Cleavage
cpe-miR156c	MSTRG.9716.3	NO	4	UGACAGAAGAGAGGGAGCAC	GUGCUCUUUCUUUUCUUUCU	Cleavage
cpe-miR156c	MSTRG.2021.1	NO	4	UGACAGAAGAGAGGGAGCAC	UCGCUUUCUCUCUUUUGUUU	Cleavage
cpe-miR156c	MSTRG.19620.15	NO	4	UGACAGAAGAGAGGGAGCAC	CAGCUCCCACUCUUCUGUUU	Cleavage
cpe-miR156c	MSTRG.603.1	NO	4	UGACAGAAGAGAGGGAGCAC	UGGUUCUCUUUCUUCUCUCA	Cleavage
cpe-miR156c	MSTRG.13887.10	NO	4	UGACAGAAGAGAGGGAGCAC	AUGUUCUUUAUCUUCUGUCU	Translation
cpe-miR156c	MSTRG.4586.3	NO	4	UGACAGAAGAGAGGGAGCAC	ACGCUCUGUUUCUUCUGUUA	Cleavage
cpe-miR156c	MSTRG.13569.1	NO	4	UGACAGAAGAGAGGGAGCAC	UUUUUUCCUCUCUUCUUUUA	Cleavage
cpe-miR156c	MSTRG.11003.1	NO	4	UGACAGAAGAGAGGGAGCAC	UUUUUCUUUUUUUUCUGUUA	Cleavage
cpe-miR156c	MSTRG.30956.1	NO	4	UGACAGAAGAGAGGGAGCAC	AUGCGGGCUCUUUUCUGUUA	Cleavage
cpe-miR156e	MSTRG.11907.9	NO	4	GUUGACAGAAGAGAGUGAGCAC	AUGUUUACUUUCUUCUGUAGGC	Cleavage
cpe-miR156e	MSTRG.13569.1	NO	4	GUUGACAGAAGAGAGUGAGCAC	UUUUUUCCUCUCUUCUUUUAAC	Cleavage
cpe-miR156e	MSTRG.12356.2	NO	4	GUUGACAGAAGAGAGUGAGCAC	UCUCUCUCUCUUUUCUCUCAAA	Cleavage
cpe-miR156e	MSTRG.25130.1	NO	4	GUUGACAGAAGAGAGUGAGCAC	UCUCUUCCUUUCUUCUCUCAGC	Cleavage
cpe-miR156e	MSTRG.19528.13	NO	4	GUUGACAGAAGAGAGUGAGCAC	UUUCUAACUCUUUUCUAUUAAU	Cleavage
cpe-miR156e	MSTRG.23562.1	NO	4	GUUGACAGAAGAGAGUGAGCAC	CACCUAACUCUUUUGUGUUAAU	Cleavage
cpe-miR159	MSTRG.4887.16	NO	4	AUUGGAUUGAAGGGAGCUCCU	AGCAGCUUUCUUCAAGUCAAU	Cleavage
cpe-miR159	MSTRG.6363.1	NO	4	AUUGGAUUGAAGGGAGCUCCU	CUUUGCUUCCUUGAAUCCAAU	Cleavage
cpe-miR162	MSTRG.28729.1	NO	4	UCGAUAAACCUCUGCAUCCAG	GUGGAGGCAGCGGUUCAUCGA	Translation
cpe-miR162	MSTRG.28729.2	NO	4	UCGAUAAACCUCUGCAUCCAG	GUGGAGGCAGCGGUUCAUCGA	Translation
cpe-miR162	MSTRG.11287.2	NO	4	UCGAUAAACCUCUGCAUCCAG	GUGGAAGCAGCGGUUCAUCGA	Translation
cpe-miR162	MSTRG.11287.3	NO	4	UCGAUAAACCUCUGCAUCCAG	GUGGAAGCAGCGGUUCAUCGA	Translation
cpe-miR164	MSTRG.14246.2	NO	4	UGGAGAAGCAGGGCACGUGCA	AGGGUGUACUUUGCUUCUCCA	Cleavage
cpe-miR167	MSTRG.2570.1	NO	4	UGAAGCUGCCAGCAUGAUCUA	GAGCUCUUGUUGGUAGCUUUG	Cleavage
cpe-miR171c	MSTRG.23476.19	NO	4	UUGAGCCGUGCCAAUAUCACG	GUUGAUAUUGGUGCUGCUGAA	Cleavage
cpe-miR171c	MSTRG.23476.18	NO	4	UUGAGCCGUGCCAAUAUCACG	GUUGAUAUUGGUGCUGCUGAA	Cleavage
cpa-miR5368	MSTRG.22658.1	NO	4	GGACAGUCUCAGGUAGACA	UGUUUGGUUGAGAUUGUCU	Cleavage
cpa-miR5368	MSTRG.698.3	NO	4	GGACAGUCUCAGGUAGACA	UGUCUACAUGAGAUUCUUC	Cleavage
cpa-miR5368	MSTRG.10366.8	NO	4	GGACAGUCUCAGGUAGACA	AGAUUACCUGAGAUUGUUU	Cleavage
cpe-miR156d	MSTRG.5821.1	NO	4	UUGACAGAAG-AUAGAGAGCAC	GUGCUCUCUAUGCUUCUGUCAU	Translation
cpe-miR156d	MSTRG.9202.1	NO	4	UUGACAGAAGAUAGAGAGCAC	UUGUUUGCUGUCUUUUGUUGA	Cleavage
cpe-miR156d	MSTRG.603.1	NO	4	UUGACAGAAGAUAGAGAGCAC	UGGUUCUCUUUCUUCUCUCAG	Cleavage
cpe-miR156d	MSTRG.1389.4	NO	4	UUGACAGAAGAUAGAGAGCAC	CCUUUCUCUAUUUUAUGUCAG	Cleavage
cpe-miR156d	MSTRG.1389.3	NO	4	UUGACAGAAGAUAGAGAGCAC	CCUUUCUCUAUUUUAUGUCAG	Cleavage
cpe-miR156d	MSTRG.4586.3	NO	4	UUGACAGAAGAUAGAGAGCAC	ACGCUCUGUUUCUUCUGUUAU	Cleavage
cpe-miR396a	MSTRG.9602.4	NO	4	UUCCACAGCUUUCUUGAACU	CAUGUAAGAAAGCUGUGGGC	Cleavage
cpe-miR396a	MSTRG.21525.5	NO	4	UUCCACAGCUUUCUUGAACU	CGUUGAAGGAAGCUCUGGAU	Cleavage
cpe-miR172	MSTRG.12919.1	NO	4	AGAAUCUUGAUGAUGCUGCAU	UAGUAGUAUUGACAAGAUUUU	Translation
cpe-miR172	MSTRG.24891.1	NO	4	AGAAUCUUGAUGAUGCUGCAU	AGACAUCAAUAUCAAGAUUCU	Cleavage
cpe-miR5067	MSTRG.17832.1	NO	4	UAAAUUAGCCGACGUGGGACUUUC	GGGAGUCUCACAUUGGGUAAUUUA	Cleavage
cpe-miR5067	MSTRG.20752.4	NO	4	UAAAUUAGCCGACGUGGGACUUUC	GGGAGUCUCACAUUAGCUAAUUUA	Translation
cpe-miR5067	MSTRG.26741.18	NO	4	UAAAUUAGCCGACGUGGGACUUUC	AGAUGUUCCACAUUGGCUAAUUAA	Cleavage
cpe-miR5067	MSTRG.26741.19	NO	4	UAAAUUAGCCGACGUGGGACUUUC	AGAUGUUCCACAUUGGCUAAUUAA	Cleavage
cpe-miR5067	MSTRG.26741.21	NO	4	UAAAUUAGCCGACGUGGGACUUUC	AGAUGUUCCACAUUGGCUAAUUAA	Cleavage
cpe-miR5067	MSTRG.26741.24	NO	4	UAAAUUAGCCGACGUGGGACUUUC	AGAUGUUCCACAUUGGCUAAUUAA	Cleavage
cpe-miR5067	MSTRG.18901.1	NO	4	UAAAUUAGCCGACGUGGGACUUUC	UCUUCUUCCGGGUCGGGUAAUUUG	Cleavage
cpe-miR396b	MSTRG.21525.5	NO	4	UUCCACAGCUUUCUUGAACUU	UCGUUGAAGGAAGCUCUGGAU	Cleavage
cpe-miR396b	MSTRG.9602.4	NO	4	UUCCACAGCUUUCUUGAACUU	GCAUGUAAGAAAGCUGUGGGC	Cleavage
cpe-miR156b	MSTRG.1389.4	NO	4.5	UGACAGAAGAUAGAGAGCAC	CCUUUCUCUAUUUUAUGUCA	Cleavage
cpe-miR156b	MSTRG.1389.3	NO	4.5	UGACAGAAGAUAGAGAGCAC	CCUUUCUCUAUUUUAUGUCA	Cleavage
cpe-miR156b	MSTRG.4586.3	NO	4.5	UGACAGAAGAUAGAGAGCAC	ACGCUCUGUUUCUUCUGUUA	Translation
cpe-miR156b	MSTRG.4648.4	NO	4.5	UGACAGAAGAUAGAGAGCAC	CUGUUCUUUACUUUCUGACA	Translation
cpe-miR156b	MSTRG.3311.2	NO	4.5	UGACAGAAGAUAGAGAGCAC	GUUCUCGCUGUCUUCUGCCG	Cleavage
cpe-miR156b	MSTRG.4648.2	NO	4.5	UGACAGAAGAUAGAGAGCAC	CUGUUCUUUACUUUCUGACA	Translation
cpe-miR156b	MSTRG.24989.2	NO	4.5	UGACAGAAGAUAGAGAGCAC	UUUCUCUCUAUUUUUUCUCC	Cleavage
cpe-miR156b	MSTRG.24989.4	NO	4.5	UGACAGAAGAUAGAGAGCAC	UUUCUCUCUAUUUUUUCUCC	Cleavage
cpe-miR156b	MSTRG.28355.1	NO	4.5	UGACAGAAGAUAGAGAGCAC	CUUUUUUGUAUUUUCUGUUA	Cleavage
cpe-miR156b	MSTRG.26544.10	NO	4.5	UGACAGAAGAUAGAGAGCAC	UUGUUAUCUAUUUUGUGUCC	Cleavage
cpe-miR156b	MSTRG.26544.9	NO	4.5	UGACAGAAGAUAGAGAGCAC	UUGUUAUCUAUUUUGUGUCC	Cleavage
cpe-miR156b	MSTRG.24989.3	NO	4.5	UGACAGAAGAUAGAGAGCAC	UUUCUCUCUAUUUUUUCUCC	Cleavage
cpe-miR156b	MSTRG.11003.1	NO	4.5	UGACAGAAGAUAGAGAGCAC	UUUUUCUUUUUUUUCUGUUA	Translation
cpe-miR156b	MSTRG.18349.10	NO	4.5	UGACAGAAGAUAGAGAGCAC	UUUCUUUUUGUCCUUUGUCA	Cleavage
cpe-miR156a	MSTRG.24075.16	NO	4.5	UGACAGAAGAGAGUGAGCAC	GUGCUUAUUUUCCUCUGUAA	Cleavage
cpe-miR156a	MSTRG.24075.20	NO	4.5	UGACAGAAGAGAGUGAGCAC	GUGCUUAUUUUCCUCUGUAA	Cleavage
cpe-miR156a	MSTRG.9716.3	NO	4.5	UGACAGAAGAGAGUGAGCAC	GUGCUCUUUCUUUUCUUUCU	Cleavage
cpe-miR156a	MSTRG.3898.1	NO	4.5	UGACAGAAGAGAGUGAGCAC	UGGCUCACCUUCUUCUCUCA	Cleavage
cpe-miR156a	MSTRG.9202.1	NO	4.5	UGACAGAAGAGAGUGAGCAC	UUGUUUGCUGUCUUUUGUUG	Translation
cpe-miR156a	MSTRG.2021.1	NO	4.5	UGACAGAAGAGAGUGAGCAC	UCGCUUUCUCUCUUUUGUUU	Cleavage
cpe-miR156a	MSTRG.603.1	NO	4.5	UGACAGAAGAGAGUGAGCAC	UGGUUCUCUUUCUUCUCUCA	Cleavage
cpe-miR156a	MSTRG.13887.10	NO	4.5	UGACAGAAGAGAGUGAGCAC	AUGUUCUUUAUCUUCUGUCU	Translation
cpe-miR156a	MSTRG.4586.3	NO	4.5	UGACAGAAGAGAGUGAGCAC	ACGCUCUGUUUCUUCUGUUA	Cleavage
cpe-miR156a	MSTRG.29809.1	NO	4.5	UGACAGAAGAGAGUGAGCAC	CUGCCUACUUUCUUCUUUUG	Cleavage
cpe-miR156a	MSTRG.25313.3	NO	4.5	UGACAGAAGAGAGUGAGCAC	UUGCUUCCCCUCUUCUUUCA	Cleavage
cpe-miR156a	MSTRG.10882.1	NO	4.5	UGACAGAAGAGAGUGAGCAC	AUCCCUACUCACUUUUGUCA	Translation
cpe-miR156a	MSTRG.11003.1	NO	4.5	UGACAGAAGAGAGUGAGCAC	UUUUUCUUUUUUUUCUGUUA	Cleavage
cpe-miR156a	MSTRG.19528.13	NO	4.5	UGACAGAAGAGAGUGAGCAC	UUUCUAACUCUUUUCUAUUA	Cleavage
cpe-miR156c	MSTRG.26336.1	NO	4.5	UGACAGAAGAGAGGGAGCAC	GUGCUCUUUAUCAUCUGUUA	Translation
cpe-miR156c	MSTRG.27296.4	NO	4.5	UGACAGAAGAGAGGGAGCAC	GUUUUCCCGUUCUUCUGUCU	Cleavage
cpe-miR156c	MSTRG.25130.1	NO	4.5	UGACAGAAGAGAGGGAGCAC	UCUCUUCCUUUCUUCUCUCA	Cleavage
cpe-miR156c	MSTRG.660.1	NO	4.5	UGACAGAAGAGAGGGAGCAC	GGUCUCUUUCUUUUCUGUUG	Cleavage
cpe-miR156c	MSTRG.12356.2	NO	4.5	UGACAGAAGAGAGGGAGCAC	UCUCUCUCUCUUUUCUCUCA	Cleavage
cpe-miR156c	MSTRG.25474.3	NO	4.5	UGACAGAAGAGAGGGAGCAC	AUGCUUUCUCUCUUUUUUUC	Cleavage
cpe-miR156c	MSTRG.16750.1	NO	4.5	UGACAGAAGAGAGGGAGCAC	CUGCUUUCUUUCUUCUUCCA	Cleavage
cpe-miR156c	MSTRG.25474.2	NO	4.5	UGACAGAAGAGAGGGAGCAC	AUGCUUUCUCUCUUUUUUUC	Cleavage
cpe-miR156c	MSTRG.3173.6	NO	4.5	UGACAGAAGAGAGGGAGCAC	UUGUUUUCUUUUUUUUGUUU	Cleavage
cpe-miR156c	MSTRG.24119.9	NO	4.5	UGACAGAAGAGAGGGAGCAC	UUGCUCCGUUUCUUCGGUCU	Cleavage
cpe-miR156c	MSTRG.25474.1	NO	4.5	UGACAGAAGAGAGGGAGCAC	AUGCUUUCUCUCUUUUUUUC	Cleavage
cpe-miR156c	MSTRG.6103.1	NO	4.5	UGACAGAAGAGAGGGAGCAC	CUUUUUCCUUUCUUUUUUCA	Cleavage
cpe-miR156c	MSTRG.781.2	NO	4.5	UGACAGAAGAGAGGGAGCAC	UUACUCUCUCUCUUCGGGCA	Cleavage
cpe-miR156c	MSTRG.1633.1	NO	4.5	UGACAGAAGAGAGGGAGCAC	UAACUGACUUUCUUCUGUCA	Cleavage
cpe-miR156c	MSTRG.24457.3	NO	4.5	UGACAGAAGAGAGGGAGCAC	UUUCUUCCUCUUUUCUGACU	Cleavage
cpe-miR156c	MSTRG.781.1	NO	4.5	UGACAGAAGAGAGGGAGCAC	UUACUCUCUCUCUUCGGGCA	Cleavage
cpe-miR156c	MSTRG.6300.15	NO	4.5	UGACAGAAGAGAGGGAGCAC	UUUUUUUUUUUCUUUUGUUA	Cleavage
cpe-miR156e	MSTRG.15879.1	NO	4.5	GUUGACAGAAGAGAGUGAGCAC	UUCAACAUUCUCUUCUGUCUAU	Cleavage
cpe-miR156e	MSTRG.603.1	NO	4.5	GUUGACAGAAGAGAGUGAGCAC	UGGUUCUCUUUCUUCUCUCAGU	Cleavage
cpe-miR156e	MSTRG.10882.1	NO	4.5	GUUGACAGAAGAGAGUGAGCAC	AUCCCUACUCACUUUUGUCAGU	Cleavage
cpe-miR156e	MSTRG.30133.1	NO	4.5	GUUGACAGAAGAGAGUGAGCAC	GAUUUUUCUUUUUUUUGUCAAA	Cleavage
cpe-miR156e	MSTRG.4586.3	NO	4.5	GUUGACAGAAGAGAGUGAGCAC	ACGCUCUGUUUCUUCUGUUAUC	Cleavage
cpe-miR156e	MSTRG.4279.24	NO	4.5	GUUGACAGAAGAGAGUGAGCAC	UGUUUCAAUUUCUACUGUUAAU	Cleavage
cpe-miR156e	MSTRG.23431.12	NO	4.5	GUUGACAGAAGAGAGUGAGCAC	UUUCUGAUGCUCUUUUGUUAAA	Cleavage
cpe-miR156e	MSTRG.23431.13	NO	4.5	GUUGACAGAAGAGAGUGAGCAC	UUUCUGAUGCUCUUUUGUUAAA	Cleavage
cpe-miR159	MSTRG.7560.2	NO	4.5	AUUGGAUUGAAGGGAGCUCCU	GUUCCUUUCCUUCAAUUCAAU	Cleavage
cpe-miR159	MSTRG.10191.1	NO	4.5	AUUGGAUUGAAGGGAGCUCCU	GUGAGCUUCUUUCUACUCAAU	Cleavage
cpe-miR159	MSTRG.4189.5	NO	4.5	AUUGGAUUGAAGGGAGCUCCU	CUGGGAUGCUUUUAAUCUGAU	Cleavage
cpe-miR160	MSTRG.5481.1	NO	4.5	UGCCUGGCUCCCUGUAUGCCA	UGGCGUAUGAGGAGCCAAGCA	Cleavage
cpe-miR160	MSTRG.5481.2	NO	4.5	UGCCUGGCUCCCUGUAUGCCA	UGGCGUAUGAGGAGCCAAGCA	Cleavage
cpe-miR160	MSTRG.23170.3	NO	4.5	UGCCUGGCUCCCUGUAUGCCA	UGGCGUAUGAGGAGCCAAGCA	Cleavage
cpe-miR160	MSTRG.5481.3	NO	4.5	UGCCUGGCUCCCUGUAUGCCA	UGGCGUAUGAGGAGCCAAGCA	Cleavage
cpe-miR160	MSTRG.5481.4	NO	4.5	UGCCUGGCUCCCUGUAUGCCA	UGGCGUAUGAGGAGCCAAGCA	Cleavage
cpe-miR162	MSTRG.8036.1	NO	4.5	UCGAUAAACCUCUGCAUCCAG	CUGGAUAAAGAGAUUUAUUGG	Cleavage
cpe-miR164	MSTRG.8735.1	NO	4.5	UGGAGAAGCAGGGCACGUGCA	UCCACGUCUCCUACUUCUCAA	Cleavage
cpe-miR164	MSTRG.20916.1	NO	4.5	UGGAGAAGCAGGGCACGUGCA	UAUGGGUGUCUUGCUUUUUUA	Cleavage
cpe-miR167	MSTRG.26871.1	NO	4.5	UGAAGCUGCCAGCAUGAUCUA	CAGAUCAUA-UGGCAGCUUCA	Cleavage
cpe-miR167	MSTRG.20345.14	NO	4.5	UGAAGCUGCCAGCAUGAUCUA	GAGAUAUUGCUGGUAAUUUCA	Cleavage
cpe-miR167	MSTRG.12919.1	NO	4.5	UGAAGCUGCCAGCAUGAUCUA	GGAAUCA-GUUGGUGGCUUCA	Cleavage
cpe-miR171a	MSTRG.20043.1	NO	4.5	UGAUUGAGCCGCGCCAAUAUC	GAUAUUGACCCGGUUCACUCA	Cleavage
cpe-miR171a	MSTRG.27364.1	NO	4.5	UGAUUGAGCCGCGCCAAUAUC	GGAGUUGGUGUGGUUCAGUUG	Cleavage
cpe-miR171b	MSTRG.20043.1	NO	4.5	UGAUUGAGCCGUGCCAAUAUC	GAUAUUGACCCGGUUCACUCA	Cleavage
cpe-miR171b	MSTRG.17510.1	NO	4.5	UGAUUGAGCCGUGCCAAUAUC	UUUAUUGGCAUGGUUAAGUUU	Cleavage
cpe-miR171b	MSTRG.22995.1	NO	4.5	UGAUUGAGCCGUGCCAAUAUC	GUUUUUCGCAUGGAUCAAUUA	Cleavage
cpe-miR171c	MSTRG.20043.1	NO	4.5	UUGAGCCGUGCCAAUAUCACG	UCUGAUAUUGACCCGGUUCAC	Translation
cpe-miR171c	MSTRG.22367.1	NO	4.5	UUGAGCCGUGCCAAUAUCACG	GGUGCUUUUGGCAUGGCCUAA	Cleavage
cpe-miR319	MSTRG.29145.12	NO	4.5	UUGGACUGAAGGGAGCUCCC	GGGUGUUUCUUUUAGUCUAC	Cleavage
cpe-miR319	MSTRG.20997.1	NO	4.5	UUGGACUGAAGGGAGCUCCC	GGAGGCUCCCUUCGCUUCGA	Cleavage
cpe-miR319	MSTRG.21010.9	NO	4.5	UUGGACUGAAGGGAGCUCCC	UGUAGUUCUCUUUAGUAUAA	Cleavage
cpe-miR319	MSTRG.5146.1	NO	4.5	UUGGACUGAAGGGAGCUCCC	UGGUGCGCCAUUUAGUUCAA	Translation
cpa-miR5368	MSTRG.27919.1	NO	4.5	GGACAGUCUCAGGUAGACA	UUUCUCCCUUAGGCUGUUC	Translation
cpe-miR156d	MSTRG.3311.2	NO	4.5	UUGACAGAAGAUAGAGAGCAC	GUUCUCGCUGUCUUCUGCCGA	Cleavage
cpe-miR156d	MSTRG.11003.1	NO	4.5	UUGACAGAAGAUAGAGAGCAC	UUUUUCUUUUUUUUCUGUUAA	Cleavage
cpe-miR156d	MSTRG.14688.13	NO	4.5	UUGACAGAAGAUAGAGAGCAC	GCUGUUUCUAUUUCCUGUCAA	Cleavage
cpe-miR156d	MSTRG.30133.1	NO	4.5	UUGACAGAAGAUAGAGAGCAC	GAUUUUUCUUUUUUUUGUCAA	Cleavage
cpe-miR156d	MSTRG.14692.7	NO	4.5	UUGACAGAAGAUAGAGAGCAC	GGUCUCUCGAUUUUAUGUCAA	Cleavage
cpe-miR156d	MSTRG.12356.2	NO	4.5	UUGACAGAAGAUAGAGAGCAC	UCUCUCUCUCUUUUCUCUCAA	Cleavage
cpe-miR156d	MSTRG.3898.1	NO	4.5	UUGACAGAAGAUAGAGAGCAC	UCUCUCUCUAUUUUCUUUCUA	Cleavage
cpe-miR156d	MSTRG.28355.1	NO	4.5	UUGACAGAAGAUAGAGAGCAC	CUUUUUUGUAUUUUCUGUUAG	Cleavage
cpe-miR156d	MSTRG.9202.2	NO	4.5	UUGACAGAAGAUAGAGAGCAC	UGCCUUCUUAUUUUCUGUUGA	Cleavage
cpe-miR156d	MSTRG.5878.7	NO	4.5	UUGACAGAAGAUAGAGAGCAC	GGUCAUUCUAUCUUCUAUCGA	Cleavage
cpe-miR156d	MSTRG.1633.1	NO	4.5	UUGACAGAAGAUAGAGAGCAC	UAACUGACUUUCUUCUGUCAA	Cleavage
cpe-miR396a	MSTRG.13249.1	NO	4.5	UUCCACAGCUUUCUUGAACU	GCCCCAAGAAAGCUGUGGGC	Cleavage
cpe-miR396a	MSTRG.19424.20	NO	4.5	UUCCACAGCUUUCUUGAACU	ACUUUAUGGAAGCUAUGGAA	Cleavage
cpe-miR396a	MSTRG.19424.26	NO	4.5	UUCCACAGCUUUCUUGAACU	ACUUUAUGGAAGCUAUGGAA	Cleavage
cpe-miR5067	MSTRG.30400.1	NO	4.5	UAAAUUAGCCGACGUGGGACUUUC	GAAAGUCCCACAUUAGCUAAUUUU	Translation
cpe-miR5067	MSTRG.10118.7	NO	4.5	UAAAUUAGCCGACGUGGGACUUUC	GGGAGUUCUACAUUGACUAAUUUA	Cleavage
cpe-miR5067	MSTRG.748.3	NO	4.5	UAAAUUAGCCGACGUGGGACUUUC	GAAUGUUCUAUGUUUGUUAGUUUA	Translation
cpe-miR5067	MSTRG.18512.8	NO	4.5	UAAAUUAGCCGACGUGGGACUUUC	CUGCGGCCUAUGUUAGCUAGUUUA	Translation
cpe-miR5067	MSTRG.23785.5	NO	4.5	UAAAUUAGCCGACGUGGGACUUUC	UCCAAUCACACGUUUGGUAAUUUA	Translation
cpe-miR5067	MSTRG.2031.1	NO	4.5	UAAAUUAGCCGACGUGGGACUUUC	UUUUUAUCCAGGACGGUUAAUUUA	Cleavage
cpe-miR5067	MSTRG.20474.1	NO	4.5	UAAAUUAGCCGACGUGGGACUUUC	ACCAAUCCCAAGUUGGUUGAGUUG	Cleavage
cpe-miR396b	MSTRG.13249.1	NO	4.5	UUCCACAGCUUUCUUGAACUU	AGCCCCAAGAAAGCUGUGGGC	Cleavage
cpe-miR396b	MSTRG.19424.20	NO	4.5	UUCCACAGCUUUCUUGAACUU	UACUUUAUGGAAGCUAUGGAA	Cleavage
cpe-miR396b	MSTRG.19424.26	NO	4.5	UUCCACAGCUUUCUUGAACUU	UACUUUAUGGAAGCUAUGGAA	Cleavage
cpe-miR166	MSTRG.18008.1	NO	4.75	UCGGACCAG--GCUUCAUUCCCC	AGGGAAUGAAGCAACUGGUCCGC	Cleavage
cpe-miR156b	MSTRG.9716.3	NO	5	UGACAGAAGAUAGAGAGCAC	GUGCUCUUUCUUUUCUUUCU	Translation
cpe-miR156b	MSTRG.14155.6	NO	5	UGACAGAAGAUAGAGAGCAC	GUGUUCUUUGUUUUCUUGCA	Cleavage
cpe-miR156b	MSTRG.3898.1	NO	5	UGACAGAAGAUAGAGAGCAC	UCUCUCUCUAUUUUCUUUCU	Cleavage
cpe-miR156b	MSTRG.2021.1	NO	5	UGACAGAAGAUAGAGAGCAC	UCGCUUUCUCUCUUUUGUUU	Translation
cpe-miR156b	MSTRG.20783.1	NO	5	UGACAGAAGAUAGAGAGCAC	CUGCUCUUUAACUUCUCUUU	Translation
cpe-miR156b	MSTRG.3173.6	NO	5	UGACAGAAGAUAGAGAGCAC	UUGUUUUCUUUUUUUUGUUU	Translation
cpe-miR156b	MSTRG.20191.2	NO	5	UGACAGAAGAUAGAGAGCAC	UCUCAUUUUAUCUUUUGUUA	Cleavage
cpe-miR156b	MSTRG.8385.1	NO	5	UGACAGAAGAUAGAGAGCAC	UUGCUCUUUAU-UUCUGACA	Cleavage
cpe-miR156b	MSTRG.1820.1	NO	5	UGACAGAAGAUAGAGAGCAC	GUACUCGUUGGCUUUUGUCA	Translation
cpe-miR156b	MSTRG.1820.3	NO	5	UGACAGAAGAUAGAGAGCAC	GUACUCGUUGGCUUUUGUCA	Translation
cpe-miR156b	MSTRG.16438.4	NO	5	UGACAGAAGAUAGAGAGCAC	UUUUUCUCUGUUUUCUUUCU	Cleavage
cpe-miR156b	MSTRG.4279.24	NO	5	UGACAGAAGAUAGAGAGCAC	UGGAUUUUUGUUUUCUGUUG	Cleavage
cpe-miR156b	MSTRG.8280.7	NO	5	UGACAGAAGAUAGAGAGCAC	UUGUAUUCUAUAUUCUUUCA	Cleavage
cpe-miR156b	MSTRG.14126.1	NO	5	UGACAGAAGAUAGAGAGCAC	UUGAUUUUUAUUCUCUGUUG	Cleavage
cpe-miR156b	MSTRG.19174.6	NO	5	UGACAGAAGAUAGAGAGCAC	CUGAUCUAUAUUUUCUGCUA	Cleavage
cpe-miR156b	MSTRG.6300.15	NO	5	UGACAGAAGAUAGAGAGCAC	UUUUUUUUUUUCUUUUGUUA	Translation
cpe-miR156b	MSTRG.12919.1	NO	5	UGACAGAAGAUAGAGAGCAC	UUCCUUUUUAUUUUUGGUUA	Cleavage
cpe-miR156a	MSTRG.18349.10	NO	5	UGACAGAA-GAGAGUGAGCAC	AUGCUUACUUUUGUUCUGUUA	Cleavage
cpe-miR156a	MSTRG.26336.1	NO	5	UGACAGAAGAGAGUGAGCAC	GUGCUCUUUAUCAUCUGUUA	Translation
cpe-miR156a	MSTRG.3311.2	NO	5	UGACAGAAGAGAGUGAGCAC	GUUCUCGCUGUCUUCUGCCG	Translation
cpe-miR156a	MSTRG.1020.1	NO	5	UGACAGAAGAGAGUGAGCAC	CAGCUCGCUCUUUCUUGUCU	Cleavage
cpe-miR156a	MSTRG.11737.10	NO	5	UGACAGAAGAGAGUGAGCAC	UUGUUUGUUUUUUUCUUUUA	Cleavage
cpe-miR156a	MSTRG.660.1	NO	5	UGACAGAAGAGAGUGAGCAC	GGUCUCUUUCUUUUCUGUUG	Cleavage
cpe-miR156a	MSTRG.16766.2	NO	5	UGACAGAAGAGAGUGAGCAC	UUGCUUAUUCUUUUGUCUUA	Cleavage
cpe-miR156a	MSTRG.12356.2	NO	5	UGACAGAAGAGAGUGAGCAC	UCUCUCUCUCUUUUCUCUCA	Cleavage
cpe-miR156a	MSTRG.7318.5	NO	5	UGACAGAAGAGAGUGAGCAC	GUGUAGACUUUCUUUUGUUC	Cleavage
cpe-miR156a	MSTRG.5867.1	NO	5	UGACAGAAGAGAGUGAGCAC	UUCUUUAUUUUCUUUUGUGA	Cleavage
cpe-miR156a	MSTRG.19620.15	NO	5	UGACAGAAGAGAGUGAGCAC	CAGCUCCCACUCUUCUGUUU	Cleavage
cpe-miR156a	MSTRG.25474.3	NO	5	UGACAGAAGAGAGUGAGCAC	AUGCUUUCUCUCUUUUUUUC	Cleavage
cpe-miR156a	MSTRG.22152.1	NO	5	UGACAGAAGAGAGUGAGCAC	UCGUUGACUCUCUUUUAUUA	Cleavage
cpe-miR156a	MSTRG.16750.1	NO	5	UGACAGAAGAGAGUGAGCAC	CUGCUUUCUUUCUUCUUCCA	Cleavage
cpe-miR156a	MSTRG.10363.1	NO	5	UGACAGAAGAGAGUGAGCAC	AAGAUUACUUUUUUUUGUUG	Cleavage
cpe-miR156a	MSTRG.10363.3	NO	5	UGACAGAAGAGAGUGAGCAC	AAGAUUACUUUUUUUUGUUG	Cleavage
cpe-miR156a	MSTRG.25474.2	NO	5	UGACAGAAGAGAGUGAGCAC	AUGCUUUCUCUCUUUUUUUC	Cleavage
cpe-miR156a	MSTRG.3173.6	NO	5	UGACAGAAGAGAGUGAGCAC	UUGUUUUCUUUUUUUUGUUU	Cleavage
cpe-miR156a	MSTRG.27919.1	NO	5	UGACAGAAGAGAGUGAGCAC	AUUCUUGUUCUUUUUUGUUU	Cleavage
cpe-miR156a	MSTRG.27216.3	NO	5	UGACAGAAGAGAGUGAGCAC	AUUUUUACUCUCUUCUUUGA	Cleavage
cpe-miR156a	MSTRG.14126.1	NO	5	UGACAGAAGAGAGUGAGCAC	AUUUUUAUUCUCUGUUGUUA	Cleavage
cpe-miR156a	MSTRG.25474.1	NO	5	UGACAGAAGAGAGUGAGCAC	AUGCUUUCUCUCUUUUUUUC	Cleavage
cpe-miR156a	MSTRG.477.2	NO	5	UGACAGAAGAGAGUGAGCAC	CUUCUCAUACUCUUUUGUUC	Cleavage
cpe-miR156a	MSTRG.477.1	NO	5	UGACAGAAGAGAGUGAGCAC	CUUCUCAUACUCUUUUGUUC	Cleavage
cpe-miR156a	MSTRG.23431.13	NO	5	UGACAGAAGAGAGUGAGCAC	UUAUUUAUUCUUUUUUGUUC	Cleavage
cpe-miR156a	MSTRG.23431.12	NO	5	UGACAGAAGAGAGUGAGCAC	UUAUUUAUUCUUUUUUGUUC	Cleavage
cpe-miR156a	MSTRG.13569.1	NO	5	UGACAGAAGAGAGUGAGCAC	UUUUUUCCUCUCUUCUUUUA	Cleavage
cpe-miR156c	MSTRG.5821.1	NO	5	UGACAGAAG-AGAGGGAGCAC	GUGCUCUCUAUGCUUCUGUCA	Translation
cpe-miR156c	MSTRG.11984.3	NO	5	UGACAGAAGAGAGGGAGCAC	GUGUUUCCUUUUUUUUUUCU	Cleavage
cpe-miR156c	MSTRG.5982.1	NO	5	UGACAGAAGAGAGGGAGCAC	GUUCUCUUUUUUUUCUUUCG	Cleavage
cpe-miR156c	MSTRG.30133.1	NO	5	UGACAGAAGAGAGGGAGCAC	GAUUUUUCUUUUUUUUGUCA	Cleavage
cpe-miR156c	MSTRG.16392.1	NO	5	UGACAGAAGAGAGGGAGCAC	UCCCUUCUUUUCUUCUUUCA	Cleavage
cpe-miR156c	MSTRG.11728.2	NO	5	UGACAGAAGAGAGGGAGCAC	UCUCUCUCUCCCUUUUGUCG	Translation
cpe-miR156c	MSTRG.11909.3	NO	5	UGACAGAAGAGAGGGAGCAC	UCUCUCUCUCUCUUCUUUCU	Cleavage
cpe-miR156c	MSTRG.11909.2	NO	5	UGACAGAAGAGAGGGAGCAC	UCUCUCUCUCUCUUCUUUCU	Cleavage
cpe-miR156c	MSTRG.24427.4	NO	5	UGACAGAAGAGAGGGAGCAC	AAGCUCUUUCUUGUCUGUCC	Cleavage
cpe-miR156c	MSTRG.11907.9	NO	5	UGACAGAAGAGAGGGAGCAC	AUGUUUACUUUCUUCUGUAG	Cleavage
cpe-miR156c	MSTRG.5482.1	NO	5	UGACAGAAGAGAGGGAGCAC	CUGCUCCACCUUUUCUGUUC	Cleavage
cpe-miR156c	MSTRG.382.3	NO	5	UGACAGAAGAGAGGGAGCAC	CUGCUCCUUUUCUUCACUCU	Cleavage
cpe-miR156c	MSTRG.23833.6	NO	5	UGACAGAAGAGAGGGAGCAC	UUGCUUCUGUUCUUCUCUUA	Cleavage
cpe-miR156c	MSTRG.3643.2	NO	5	UGACAGAAGAGAGGGAGCAC	UUGCUCUUUUUCUUUUCUGA	Cleavage
cpe-miR156c	MSTRG.3643.3	NO	5	UGACAGAAGAGAGGGAGCAC	UUGCUCUUUUUCUUUUCUGA	Cleavage
cpe-miR156c	MSTRG.3643.1	NO	5	UGACAGAAGAGAGGGAGCAC	UUGCUCUUUUUCUUUUCUGA	Cleavage
cpe-miR156c	MSTRG.13787.1	NO	5	UGACAGAAGAGAGGGAGCAC	GUAUUCAAUCUCUUCUGUUG	Cleavage
cpe-miR156c	MSTRG.13033.3	NO	5	UGACAGAAGAGAGGGAGCAC	AUGCUCUUUCUUUUUCUUCA	Cleavage
cpe-miR156c	MSTRG.833.1	NO	5	UGACAGAAGAGAGGGAGCAC	GUAUUCAAUCUCUUCUGUUG	Cleavage
cpe-miR156c	MSTRG.13033.2	NO	5	UGACAGAAGAGAGGGAGCAC	AUGCUCUUUCUUUUUCUUCA	Cleavage
cpe-miR156c	MSTRG.22443.7	NO	5	UGACAGAAGAGAGGGAGCAC	AAGCUAUCUUUUUUCUGGCA	Cleavage
cpe-miR156c	MSTRG.13033.1	NO	5	UGACAGAAGAGAGGGAGCAC	AUGCUCUUUCUUUUUCUUCA	Cleavage
cpe-miR156c	MSTRG.13033.4	NO	5	UGACAGAAGAGAGGGAGCAC	AUGCUCUUUCUUUUUCUUCA	Cleavage
cpe-miR156c	MSTRG.15793.1	NO	5	UGACAGAAGAGAGGGAGCAC	GUGCCAUUUCUCUUCUGAUA	Cleavage
cpe-miR156c	MSTRG.11733.2	NO	5	UGACAGAAGAGAGGGAGCAC	AAGUUGCUUCUUUUUUGUCC	Cleavage
cpe-miR156c	MSTRG.18710.1	NO	5	UGACAGAAGAGAGGGAGCAC	CGGUGCUCUCUUUUUUGUCC	Cleavage
cpe-miR156c	MSTRG.7560.2	NO	5	UGACAGAAGAGAGGGAGCAC	UUUUUUUUUUUUUUUUGUUA	Cleavage
cpe-miR156c	MSTRG.6434.1	NO	5	UGACAGAAGAGAGGGAGCAC	AGGCACUUUCUUUCCUGUCA	Cleavage
cpe-miR156c	MSTRG.19562.1	NO	5	UGACAGAAGAGAGGGAGCAC	CUGAUUCUUCUCUUCUUUUU	Cleavage
cpe-miR156c	MSTRG.20137.4	NO	5	UGACAGAAGAGAGGGAGCAC	UUGCUGCUUUUCUUCUUUGA	Cleavage
cpe-miR156c	MSTRG.12816.3	NO	5	UGACAGAAGAGAGGGAGCAC	AUGUUAUUUUUCUUUUUUCA	Cleavage
cpe-miR156c	MSTRG.12816.2	NO	5	UGACAGAAGAGAGGGAGCAC	AUGUUAUUUUUCUUUUUUCA	Cleavage
cpe-miR156c	MSTRG.12816.1	NO	5	UGACAGAAGAGAGGGAGCAC	AUGUUAUUUUUCUUUUUUCA	Cleavage
cpe-miR156c	MSTRG.9202.1	NO	5	UGACAGAAGAGAGGGAGCAC	UUGUUUGCUGUCUUUUGUUG	Translation
cpe-miR156c	MSTRG.7205.7	NO	5	UGACAGAAGAGAGGGAGCAC	UUCUUCUCUCUGUUCUUUCA	Cleavage
cpe-miR156c	MSTRG.7496.2	NO	5	UGACAGAAGAGAGGGAGCAC	UUUUUCUUUCUUUGCUGUUA	Cleavage
cpe-miR156c	MSTRG.26803.6	NO	5	UGACAGAAGAGAGGGAGCAC	UUUUUUUUUUUUUUUUGUUA	Cleavage
cpe-miR156c	MSTRG.9716.2	NO	5	UGACAGAAGAGAGGGAGCAC	UUGAUCUUUCUUUUUUGGUA	Cleavage
cpe-miR156e	MSTRG.9202.1	NO	5	GUUGACAGAAGAGAGUGAGCAC	UUGUUUGCUGUCUUUUGUUGAU	Cleavage
cpe-miR156e	MSTRG.13787.1	NO	5	GUUGACAGAAGAGAGUGAGCAC	GUAUUCAAUCUCUUCUGUUGUU	Cleavage
cpe-miR156e	MSTRG.833.1	NO	5	GUUGACAGAAGAGAGUGAGCAC	GUAUUCAAUCUCUUCUGUUGUU	Cleavage
cpe-miR156e	MSTRG.11972.10	NO	5	GUUGACAGAAGAGAGUGAGCAC	UUGUGUAUUUUUUUCUGUCGGU	Cleavage
cpe-miR156e	MSTRG.3311.2	NO	5	GUUGACAGAAGAGAGUGAGCAC	GUUCUCGCUGUCUUCUGCCGAA	Cleavage
cpe-miR156e	MSTRG.11323.3	NO	5	GUUGACAGAAGAGAGUGAGCAC	AGUACAACUCUUUUCUGUCGAG	Cleavage
cpe-miR156e	MSTRG.1820.1	NO	5	GUUGACAGAAGAGAGUGAGCAC	GUACUCGUUGGCUUUUGUCAGC	Cleavage
cpe-miR156e	MSTRG.1820.3	NO	5	GUUGACAGAAGAGAGUGAGCAC	GUACUCGUUGGCUUUUGUCAGC	Cleavage
cpe-miR156e	MSTRG.25313.3	NO	5	GUUGACAGAAGAGAGUGAGCAC	UUGCUUCCCCUCUUCUUUCAAA	Cleavage
cpe-miR156e	MSTRG.19198.1	NO	5	GUUGACAGAAGAGAGUGAGCAC	CAGCUCAAUUUCCUCUGAUAAC	Translation
cpe-miR156e	MSTRG.14126.1	NO	5	GUUGACAGAAGAGAGUGAGCAC	AUUUUUAUUCUCUGUUGUUAGU	Cleavage
cpe-miR156e	MSTRG.20.8	NO	5	GUUGACAGAAGAGAGUGAGCAC	AGAGUCAUUUUCUCUUGUUGAC	Cleavage
cpe-miR156e	MSTRG.7560.2	NO	5	GUUGACAGAAGAGAGUGAGCAC	UUUUUUUUUUUUUUUUGUUAAU	Cleavage
cpe-miR156e	MSTRG.4887.16	NO	5	GUUGACAGAAGAGAGUGAGCAC	CUACUCAAGUUCUUUUGUUAUC	Cleavage
cpe-miR156e	MSTRG.16392.1	NO	5	GUUGACAGAAGAGAGUGAGCAC	UCCCUUCUUUUCUUCUUUCAAA	Cleavage
cpe-miR156e	MSTRG.781.2	NO	5	GUUGACAGAAGAGAGUGAGCAC	UUACUCUCUCUCUUCGGGCAAA	Cleavage
cpe-miR156e	MSTRG.781.1	NO	5	GUUGACAGAAGAGAGUGAGCAC	UUACUCUCUCUCUUCGGGCAAA	Cleavage
cpe-miR156e	MSTRG.20395.1	NO	5	GUUGACAGAAGAGAGUGAGCAC	GGCCUUCCUCUUUUCUUUCCAC	Cleavage
cpe-miR156e	MSTRG.8470.1	NO	5	GUUGACAGAAGAGAGUGAGCAC	UUGCCAAAGUUCUUCUGUCAGC	Cleavage
cpe-miR156e	MSTRG.7205.7	NO	5	GUUGACAGAAGAGAGUGAGCAC	UUCUUCUCUCUGUUCUUUCAAU	Translation
cpe-miR156e	MSTRG.26803.6	NO	5	GUUGACAGAAGAGAGUGAGCAC	UUUUUUUUUUUUUUUUGUUAAU	Cleavage
cpe-miR156e	MSTRG.11728.2	NO	5	GUUGACAGAAGAGAGUGAGCAC	UCUCUCUCUCCCUUUUGUCGUC	Cleavage
cpe-miR159	MSTRG.26570.6	NO	5	AUUGGAUUGAAGGGAGCUCCU	CUGAGUUCCAUUUAAGCCAAA	Cleavage
cpe-miR159	MSTRG.20123.5	NO	5	AUUGGAUUGAAGGGAGCUCCU	UUGGGCUUCUAUUGAUUUAAU	Translation
cpe-miR159	MSTRG.1020.1	NO	5	AUUGGAUUGAAGGGAGCUCCU	CUGAGCUCCUUAUACUCUAGU	Translation
cpe-miR159	MSTRG.28072.5	NO	5	AUUGGAUUGAAGGGAGCUCCU	CUCUCCCCCCUUUGAUCCAAU	Cleavage
cpe-miR159	MSTRG.748.3	NO	5	AUUGGAUUGAAGGGAGCUCCU	GGAAUCUGUCUUCAAUUCAAA	Cleavage
cpe-miR159	MSTRG.5146.1	NO	5	AUUGGAUUGAAGGGAGCUCCU	UGGUGCGCCAUUUAGUUCAAU	Cleavage
cpe-miR159	MSTRG.25126.10	NO	5	AUUGGAUUGAAGGGAGCUCCU	AAAAUCUCCUUUUAGACCAAU	Cleavage
cpe-miR159	MSTRG.2037.1	NO	5	AUUGGAUUGAAGGGAGCUCCU	UUCAGGUUUCUUUAAUCCCAU	Cleavage
cpe-miR159	MSTRG.5700.16	NO	5	AUUGGAUUGAAGGGAGCUCCU	AAGGGGUUUCUUCCAUCUGAU	Cleavage
cpe-miR159	MSTRG.5700.18	NO	5	AUUGGAUUGAAGGGAGCUCCU	AAGGGGUUUCUUCCAUCUGAU	Cleavage
cpe-miR159	MSTRG.20829.1	NO	5	AUUGGAUUGAAGGGAGCUCCU	UCGAAUUCUCUUCAACACAAU	Cleavage
cpe-miR160	MSTRG.14084.4	NO	5	UGCCUGGCUCCCUGUAUGCCA	CUGGAUUCAGGGAACCAGGAA	Cleavage
cpe-miR162	MSTRG.3914.10	NO	5	UCGAUAAACCUCUGCAUCCAG	GAGGAUG-AUGGGUUUAUUGG	Cleavage
cpe-miR162	MSTRG.29139.5	NO	5	UCGAUAAACCUCUGCAUCCAG	ACGGAUGUUGAGGAUUGUUGG	Cleavage
cpe-miR162	MSTRG.4700.8	NO	5	UCGAUAAACCUCUGCAUCCAG	CAAAAUGAAGAGGUAUAUUGA	Cleavage
cpe-miR164	MSTRG.24119.9	NO	5	UGGAGAAGCAGGGCACGUGCA	ACCAUUUGCUCCGUUUCUUCG	Translation
cpe-miR164	MSTRG.26803.7	NO	5	UGGAGAAGCAGGGCACGUGCA	CCCACCUGCCUUGCUCUUCAA	Cleavage
cpe-miR164	MSTRG.26803.6	NO	5	UGGAGAAGCAGGGCACGUGCA	CCCACCUGCCUUGCUCUUCAA	Cleavage
cpe-miR164	MSTRG.3643.2	NO	5	UGGAGAAGCAGGGCACGUGCA	GGGAUUUACCUUGUUUUUCCA	Cleavage
cpe-miR164	MSTRG.3643.3	NO	5	UGGAGAAGCAGGGCACGUGCA	GGGAUUUACCUUGUUUUUCCA	Cleavage
cpe-miR164	MSTRG.3643.1	NO	5	UGGAGAAGCAGGGCACGUGCA	GGGAUUUACCUUGUUUUUCCA	Cleavage
cpe-miR164	MSTRG.5616.1	NO	5	UGGAGAAGCAGGGC-ACGUGCA	AUCUCGUCGUUUUGCUUCUUCA	Cleavage
cpe-miR164	MSTRG.28417.1	NO	5	UGGAGAAGCAGGGCACGUGCA	UAUACUUUCAUUGCUUCUUCA	Cleavage
cpe-miR164	MSTRG.19092.2	NO	5	UGGAGAAGCAGGGCACGUGCA	AACACGAACCCAGAUUCUCCA	Translation
cpe-miR164	MSTRG.19092.1	NO	5	UGGAGAAGCAGGGCACGUGCA	AACACGAACCCAGAUUCUCCA	Translation
cpe-miR164	MSTRG.11728.2	NO	5	UGGAGAAGCAGGGCACGUGCA	GUCACCUUCUCUGUCUCUCUA	Cleavage
cpe-miR164	MSTRG.28570.5	NO	5	UGGAGAAGCAGGGCACGUGCA	CCCAAUUUCCUUGCUUCUCUC	Cleavage
cpe-miR166	MSTRG.15431.1	NO	5	UCGGACCAGGCUUCAUUCCCC	UCCGAAUGGGGUCGGGUUUGA	Cleavage
cpe-miR166	MSTRG.22327.1	NO	5	UCGGACCAGGCUUCAUUCCCC	AAGGGAAAAAGUUUGGUCAGA	Cleavage
cpe-miR167	MSTRG.28700.4	NO	5	UGAAGCUGCCAGCAUGAUCUA	UGGAUCAUGCUUGCAUUUUUC	Translation
cpe-miR167	MSTRG.20454.1	NO	5	UGAAGCUGCCAGCAUGAUCUA	UUUUUCAUGAUGGUAGUUUUA	Cleavage
cpe-miR167	MSTRG.5852.1	NO	5	UGAAGCUGCCAGCAUGAUCUA	GUUAUCAAACUGGAAGCUUCA	Cleavage
cpe-miR167	MSTRG.24732.6	NO	5	UGAAGCUGCCAGCAUGAUCUA	UCCGUUUUGCUGUCAGUUUCA	Cleavage
cpe-miR171a	MSTRG.2852.1	NO	5	UGAUUGAGCCGCGCCAAUAUC	UUUAUUGACAUGGCUAAGUCA	Cleavage
cpe-miR171b	MSTRG.27364.1	NO	5	UGAUUGAGCCGUGCCAAUAUC	GGAGUUGGUGUGGUUCAGUUG	Cleavage
cpe-miR171b	MSTRG.15116.12	NO	5	UGAUUGAGCCGUGCCAAUAUC	UAUUUUUGGACGGUUCAAUUG	Cleavage
cpe-miR171b	MSTRG.15116.10	NO	5	UGAUUGAGCCGUGCCAAUAUC	UAUUUUUGGACGGUUCAAUUG	Cleavage
cpe-miR171b	MSTRG.15116.11	NO	5	UGAUUGAGCCGUGCCAAUAUC	UAUUUUUGGACGGUUCAAUUG	Cleavage
cpe-miR171c	MSTRG.17170.7	NO	5	UUGAGCCGUGCCAAUAUCACG	CCUGAUAUUGUUGCUGCUCAU	Translation
cpe-miR171c	MSTRG.15805.6	NO	5	UUGAGCCGUGCCAAUAUCACG	AAUCAUAUUGGCUCGUUUUAA	Cleavage
cpe-miR171c	MSTRG.15805.5	NO	5	UUGAGCCGUGCCAAUAUCACG	AAUCAUAUUGGCUCGUUUUAA	Cleavage
cpe-miR171c	MSTRG.15805.3	NO	5	UUGAGCCGUGCCAAUAUCACG	AAUCAUAUUGGCUCGUUUUAA	Cleavage
cpe-miR319	MSTRG.11440.20	NO	5	UUGGACUGAAGGGAGCUCCC	AUUCGUUUCCUUUGGUCCAA	Cleavage
cpe-miR319	MSTRG.21072.1	NO	5	UUGGACUGAAGGGAGCUCCC	UUCAGCUUUCUUCUGUUCAA	Cleavage
cpe-miR319	MSTRG.1505.1	NO	5	UUGGACUGAAGGGAGCUCCC	UGGAGCGUUUUUUAGCCUAA	Cleavage
cpe-miR319	MSTRG.30724.1	NO	5	UUGGACUGAAGGGAGCUCCC	CGGACCUUCCUUCCUUCUAA	Cleavage
cpe-miR319	MSTRG.5821.1	NO	5	UUGGACUGAAGGGAGCUCCC	UGGAACACCUUUUAGUUUAU	Cleavage
cpa-miR5368	MSTRG.23688.3	NO	5	GGACAGUCUCAGGUAGACA	CUUUUGCCUGAGAUUGGCC	Cleavage
cpa-miR5368	MSTRG.23688.2	NO	5	GGACAGUCUCAGGUAGACA	CUUUUGCCUGAGAUUGGCC	Cleavage
cpa-miR5368	MSTRG.23688.1	NO	5	GGACAGUCUCAGGUAGACA	CUUUUGCCUGAGAUUGGCC	Cleavage
cpa-miR5368	MSTRG.11214.2	NO	5	GGACAGUCUCAGGUAGACA	UGUCUGCUUUGGGCUGUUA	Translation
cpa-miR5368	MSTRG.21384.11	NO	5	GGACAGUCUCAGGUAGACA	UGUCUAUCUGAGUUGGUUU	Cleavage
cpa-miR5368	MSTRG.22729.2	NO	5	GGACAGUCUCAGGUAGACA	UGCCUUCUUGGGGCUUUCC	Cleavage
cpa-miR5368	MSTRG.10806.1	NO	5	GGACAGUCUCAGGUAGACA	UGAUCAUCUGGGACUGUAC	Cleavage
cpe-miR156d	MSTRG.26544.10	NO	5	UUGACAGAAGAUAGAGAGCAC	UUGUUAUCUAUUUUGUGUCCA	Cleavage
cpe-miR156d	MSTRG.26544.9	NO	5	UUGACAGAAGAUAGAGAGCAC	UUGUUAUCUAUUUUGUGUCCA	Cleavage
cpe-miR156d	MSTRG.28252.2	NO	5	UUGACAGAAGAUAGAGAGCAC	CUGCUUUGUAUGUUUUUUCAA	Translation
cpe-miR156d	MSTRG.12919.1	NO	5	UUGACAGAAGAUAGAGAGCAC	UUCCUUUUUAUUUUUGGUUAA	Cleavage
cpe-miR156d	MSTRG.23672.6	NO	5	UUGACAGAAGAUAGAGAGCAC	UAACUUUCUGUUUUCUAUUGA	Cleavage
cpe-miR156d	MSTRG.24212.6	NO	5	UUGACAGAAGAUAGAGAGCAC	GAAUUCUUUAUCUUCUUCCAA	Cleavage
cpe-miR156d	MSTRG.22679.5	NO	5	UUGACAGAAGAUAGAGAGCAC	CAACUUUCUAGCUUUUGUCCA	Translation
cpe-miR156d	MSTRG.20191.2	NO	5	UUGACAGAAGAUAGAGAGCAC	UCUCAUUUUAUCUUUUGUUAU	Cleavage
cpe-miR156d	MSTRG.30846.6	NO	5	UUGACAGAAGAUAGAGAGCAC	UUGUUC-CUAUUUUUUGUUAU	Cleavage
cpe-miR156d	MSTRG.4279.24	NO	5	UUGACAGAAGAUAGAGAGCAC	UGGAUUUUUGUUUUCUGUUGC	Cleavage
cpe-miR396a	MSTRG.19528.13	NO	5	UUCCACAGCUUUCUUGAACU	UGUUUUAGAGAGUUGUGGUG	Cleavage
cpe-miR396a	MSTRG.17055.5	NO	5	UUCCACAGCUUUCUUGAACU	AUGCCACGAAGGUUGUGGAA	Cleavage
cpe-miR396a	MSTRG.24708.2	NO	5	UUCCACAGCUUUCUUGAACU	GGUGUCAGAAGGUCGUGGAA	Cleavage
cpe-miR396a	MSTRG.24708.3	NO	5	UUCCACAGCUUUCUUGAACU	GGUGUCAGAAGGUCGUGGAA	Cleavage
cpe-miR172	MSTRG.13453.1	NO	5	AGAAUCUUGAUGAUGCUGCAU	UAGCAGUGUCAUCAAGAUGUC	Cleavage
cpe-miR172	MSTRG.24134.3	NO	5	AGAAUCUUGAUGAUGCUGCAU	CUGCAGCAUUGUGGAGGUUUG	Cleavage
cpe-miR172	MSTRG.11737.10	NO	5	AGAAUCUUGAUGAUGCUGCAU	GUGAAGGGUCAUCAAUAUUCG	Cleavage
cpe-miR172	MSTRG.4115.7	NO	5	AGAAUCUUGAUGAUGCUGCAU	ACUCAGUAUCAUAAAUAUUUU	Cleavage
cpe-miR172	MSTRG.21483.6	NO	5	AGAAUCUUGAUGAUGCUGCAU	GUGCAGACUGAUCAAAAUUCU	Cleavage
cpe-miR172	MSTRG.5454.11	NO	5	AGAAUCUUGAUGAU-GCUGCAU	CCCCAGUGAUCAUCAAAAUUCU	Cleavage
cpe-miR172	MSTRG.11274.1	NO	5	AGAAUCUUGAUGAUGCUGCAU	CGUCGGCUUCGUCGAGAAUCU	Cleavage
cpe-miR172	MSTRG.11928.3	NO	5	AGAAUCUUGAUGAUGCUGCAU	GAGAGGCAUCAUCGACAUUGU	Cleavage
cpe-miR172	MSTRG.11928.1	NO	5	AGAAUCUUGAUGAUGCUGCAU	GAGAGGCAUCAUCGACAUUGU	Cleavage
cpe-miR172	MSTRG.27614.1	NO	5	AGAAUCUUGAUGAUGCUGCAU	AGACAGC-UUAUCAAGACUCU	Cleavage
cpe-miR172	MSTRG.19501.2	NO	5	AGAAUCUUGAUGAUGCUGCAU	UCGAGGUUUCCUCAAGAUUUU	Translation
cpe-miR5067	MSTRG.29825.3	NO	5	UAAAUUAGCCGACGUGGGACUUUC	UUUGUUCCUUCGUUGUUUAAUUUU	Cleavage
cpe-miR5067	MSTRG.4827.1	NO	5	UAAAUUAGCCGACGUGGGACUUUC	GCUAAAUUUAAGUUGGUUGAUUUA	Cleavage
cpe-miR5067	MSTRG.27364.2	NO	5	UAAAUUAGCCGACGUGGGACUUUC	CUGUAUACUAUAUCUGCUAAUUUA	Translation
cpe-miR396b	MSTRG.19528.13	NO	5	UUCCACAGCUUUCUUGAACUU	CUGUUUUAGAGAGUUGUGGUG	Cleavage
cpe-miR396b	MSTRG.17055.5	NO	5	UUCCACAGCUUUCUUGAACUU	GAUGCCACGAAGGUUGUGGAA	Cleavage
cpe-miR396b	MSTRG.24708.2	NO	5	UUCCACAGCUUUCUUGAACUU	UGGUGUCAGAAGGUCGUGGAA	Cleavage
cpe-miR396b	MSTRG.24708.3	NO	5	UUCCACAGCUUUCUUGAACUU	UGGUGUCAGAAGGUCGUGGAA	Cleavage
